# Supplementary material for: Determinants of seasonal changes in availability of food patches for elephants (Loxodonta africana) in a semi-arid African savanna
Source: PeerJ. 2017 Jun 20;5:e3453. doi: 10.7717/peerj.3453 (PMC5480392; doi:10.7717/peerj.3453)
Supplement: Supplemental Information 1 [file peerj-05-3453-s001.xlsx]

## Sheet: Green leaf patch density bulls
Patch density (patches/m2) time series for green leaf by land unit (bulls)
Land unit ID	1	2	3	4	5	6	7	8	9	10	11	12	13	14	15	16	17	18	19	20	21	22	23	24	25	26	27	28	29	30	31	32	33	34	35	36	37	38	43	44	45	46	47	48	49	50	51	52	53
Vegetation type	1	2	3	4	5	6	7	8	9	10	11	12	13	14	15	16	17	18	19	20	21	22	23	24	25	26	27	28	29	30	31	32	33	34	35	36	37	38	4	9	10	11	15	18	22	23	24	25	28
Early flush	0	0	0	0	0	0	0	0	0	0	0	0	0	0	0	0	0	0	0	0	0	0	0	0	0	0	0	0	0	0	0	0	0	0	0	0	0	0	0	0	0	0	0	0	0	0	0	0	0
Burnt	0	0	0	0	0	0	0	0	0	0	0	1	0	0	0	0	0	0	0	0	0	0	0	0	0	0	0	0	0	0	0	0	0	0	0	0	0	0	1	1	1	1	1	1	1	1	1	1	1
% clay	10	4.8	4	6.4	8	8	5	15.5	12.7	9.7	8.5	31.3	19	16	12.7	13	18	17.1	10.4	16.2	15.7	16.8	20.4	30.7	26	11.2	16.8	37.2	13.3	30.7	6.7	26	40.3	41.5	22.5	35.1	40	16.5	6.4	12.7	9.7	8.5	12.7	17.1	16.8	20.4	30.7	26	37.2
2002-03-12	0.193961	0.113867	0.0315876	0.139336	0.16384	0.242667	0.203488	0.272275	0.0848781	0.193843	0.0965852	0.0331556	0.161379	0.362206	0.131408	0.190826	0.172716	0.0944944	0.206089	0.124863	0.27261	0.0591181	0.0712324	0.363111	0.0291575	0.138628	0.120892	0.05684	0.0678167	0.0117111	0.103044	0.0764828	0.0453931	0.06845	0.185476	0.0966946	0.104544	0.0651382	0.114942	0.0848781	0.192207	0.0323266	0.131408	0.0944944	0.0590681	0.0712324	0.363111	0.0291575	0.0297067
2002-03-13	0.193961	0.113867	0.0315876	0.139336	0.16384	0.242667	0.203488	0.272275	0.0848781	0.193843	0.0965852	0.0331556	0.161379	0.362206	0.131408	0.190826	0.172716	0.0944944	0.206089	0.124863	0.27261	0.0591181	0.0712324	0.363111	0.0291575	0.138628	0.120892	0.05684	0.0678167	0.0117111	0.103044	0.0764828	0.0453931	0.06845	0.185476	0.0966946	0.104544	0.0651382	0.114942	0.0848781	0.192207	0.0323266	0.131408	0.0944944	0.0590681	0.0712324	0.363111	0.0291575	0.0297067
2002-03-14	0.193961	0.113867	0.0315876	0.139336	0.16384	0.242667	0.203488	0.272275	0.0848781	0.193843	0.0965852	0.0331556	0.161379	0.362206	0.131408	0.190826	0.172716	0.0944944	0.206089	0.124863	0.27261	0.0591181	0.0712324	0.363111	0.0291575	0.138628	0.120892	0.05684	0.0678167	0.0117111	0.103044	0.0764828	0.0453931	0.06845	0.185476	0.0966946	0.104544	0.0651382	0.114942	0.0848781	0.192207	0.0323266	0.131408	0.0944944	0.0590681	0.0712324	0.363111	0.0291575	0.0297067
2002-03-15	0.193961	0.113867	0.0315876	0.139336	0.16384	0.242667	0.203488	0.272275	0.0848781	0.193843	0.0965852	0.0331556	0.161379	0.362206	0.131408	0.190826	0.172716	0.0944944	0.206089	0.124863	0.27261	0.0591181	0.0712324	0.363111	0.0291575	0.138628	0.120892	0.05684	0.0678167	0.0117111	0.103044	0.0764828	0.0453931	0.06845	0.185476	0.0966946	0.104544	0.0651382	0.114942	0.0848781	0.192207	0.0323266	0.131408	0.0944944	0.0590681	0.0712324	0.363111	0.0291575	0.0297067
2002-03-16	0.193961	0.113867	0.0315876	0.139336	0.16384	0.242667	0.203488	0.272275	0.0848781	0.193843	0.0965852	0.0331556	0.161379	0.362206	0.131408	0.190826	0.172716	0.0944944	0.206089	0.124863	0.27261	0.0591181	0.0683397	0.363111	0.0291575	0.138628	0.120892	0.05684	0.0678167	0.0117111	0.103044	0.0764828	0.0453931	0.06845	0.185476	0.0966946	0.104544	0.0651382	0.114942	0.0848781	0.192207	0.0323266	0.131408	0.0944944	0.0590681	0.0712324	0.363111	0.0291575	0.0297067
2002-03-17	0.193961	0.113867	0.0315876	0.139336	0.16384	0.242667	0.203488	0.272275	0.0848781	0.193843	0.0965852	0.0331556	0.161379	0.362206	0.131408	0.190826	0.172716	0.0944944	0.206089	0.124863	0.27181	0.0591181	0.0683397	0.363111	0.0291575	0.138428	0.120892	0.05684	0.0678167	0.0117111	0.103044	0.0764828	0.0453931	0.06845	0.185476	0.0966946	0.104544	0.0651382	0.114942	0.0848781	0.192207	0.0323266	0.131408	0.0944944	0.0590681	0.0712324	0.363111	0.0291575	0.0297067
2002-03-18	0.193961	0.113867	0.0315876	0.139336	0.16384	0.242667	0.203488	0.272275	0.0848781	0.193843	0.0965852	0.0331556	0.161379	0.362206	0.131408	0.190826	0.172716	0.0944944	0.206089	0.124863	0.27181	0.0591181	0.0683397	0.363111	0.0291575	0.138428	0.120892	0.05684	0.0678167	0.0117111	0.103044	0.0764828	0.0453931	0.06845	0.185476	0.0966946	0.104544	0.0651382	0.114942	0.0848781	0.192207	0.0323266	0.131408	0.0944944	0.0590681	0.0712324	0.363111	0.0291575	0.0297067
2002-03-19	0.193961	0.113867	0.0315876	0.139336	0.16384	0.242667	0.203488	0.272275	0.0848781	0.193843	0.0965852	0.0331556	0.161379	0.362206	0.131408	0.190826	0.172716	0.0944944	0.206089	0.124863	0.27181	0.0591181	0.0683397	0.363111	0.0291575	0.138428	0.120892	0.05684	0.0678167	0.0117111	0.103044	0.0764828	0.0453931	0.06845	0.185476	0.0966946	0.104544	0.0651382	0.114942	0.0848781	0.192207	0.0323266	0.131408	0.0944944	0.0590681	0.0712324	0.363111	0.0291575	0.0297067
2002-03-20	0.193961	0.113867	0.0315876	0.139336	0.16384	0.242667	0.203488	0.272275	0.0848781	0.193843	0.0965852	0.0331556	0.161379	0.362206	0.131408	0.190826	0.172716	0.0944944	0.206089	0.124863	0.27181	0.0591181	0.0683397	0.363111	0.0291575	0.138428	0.120892	0.05684	0.0678167	0.0117111	0.103044	0.0764828	0.0453931	0.06845	0.185476	0.0966946	0.104544	0.0651382	0.114942	0.0848781	0.192207	0.0323266	0.131408	0.0944944	0.0590681	0.0712324	0.363111	0.0291575	0.0297067
2002-03-21	0.193961	0.113867	0.0315876	0.139336	0.16384	0.242667	0.203488	0.272275	0.0848781	0.193843	0.0965852	0.0331556	0.161379	0.335361	0.131408	0.115226	0.172716	0.0944944	0.206089	0.124863	0.27181	0.0591181	0.0683397	0.363111	0.0291575	0.138428	0.120408	0.05684	0.0678167	0.0117111	0.103044	0.0764828	0.0453931	0.06845	0.185476	0.0966946	0.104544	0.0651382	0.114942	0.0848781	0.192207	0.0323266	0.131408	0.0944944	0.0590681	0.0712324	0.363111	0.0291575	0.0297067
2002-03-22	0.193597	0.113867	0.0315876	0.139336	0.16384	0.242667	0.203488	0.272275	0.0848781	0.193843	0.0964519	0.0331556	0.161379	0.335139	0.131408	0.115226	0.172716	0.0944944	0.206089	0.124863	0.27181	0.0591181	0.0683397	0.363111	0.0291575	0.138228	0.120408	0.05684	0.0678167	0.0117111	0.103044	0.0764828	0.0453931	0.06845	0.185249	0.0966946	0.104544	0.0651382	0.114942	0.0848781	0.192207	0.0321933	0.131408	0.0944944	0.0590681	0.0712324	0.363111	0.0291575	0.0297067
2002-03-23	0.193597	0.113867	0.0315876	0.139336	0.16384	0.242667	0.203488	0.272275	0.0848781	0.193843	0.0964519	0.0331556	0.161379	0.335139	0.131408	0.115226	0.172716	0.0944944	0.206089	0.11696	0.27181	0.0591181	0.0604454	0.363111	0.0291575	0.138228	0.120408	0.05684	0.0678167	0.0117111	0.103044	0.0764828	0.0453931	0.06845	0.185249	0.0966946	0.104544	0.0634049	0.114942	0.0848781	0.192207	0.0321933	0.131408	0.0944944	0.0590681	0.0712324	0.363111	0.0291575	0.0297067
2002-03-24	0.193597	0.113867	0.0315876	0.139336	0.16384	0.242667	0.203488	0.272275	0.0848781	0.193843	0.0964519	0.0331556	0.161379	0.335139	0.131408	0.115226	0.172716	0.0944944	0.206089	0.11696	0.27181	0.0591181	0.0604454	0.363111	0.0291575	0.138228	0.120408	0.05684	0.0678167	0.0117111	0.103044	0.0764828	0.0453931	0.06845	0.185249	0.0966946	0.104544	0.0634049	0.114942	0.0848781	0.192207	0.0321933	0.131408	0.0944944	0.0590681	0.0712324	0.363111	0.0291575	0.0297067
2002-03-25	0.193597	0.113867	0.0315876	0.139336	0.16384	0.242667	0.203488	0.272275	0.0848781	0.193843	0.0964519	0.0331556	0.161379	0.335139	0.131408	0.115226	0.172716	0.0944944	0.206089	0.11696	0.27181	0.0591181	0.0604454	0.363111	0.0291575	0.138228	0.120408	0.05684	0.0678167	0.0117111	0.103044	0.0764828	0.0453931	0.06845	0.185249	0.0966946	0.104544	0.0634049	0.114942	0.0848781	0.192207	0.0321933	0.131408	0.0944944	0.0590681	0.0712324	0.363111	0.0291575	0.0297067
2002-03-26	0.193597	0.113867	0.0315876	0.139336	0.16384	0.242667	0.203488	0.272275	0.0848781	0.193843	0.0964519	0.0331556	0.161379	0.335139	0.131408	0.115226	0.172716	0.0944944	0.206089	0.11696	0.27181	0.0591181	0.0604454	0.363111	0.0291575	0.138228	0.119583	0.05684	0.0678167	0.0117111	0.103044	0.0764828	0.0453931	0.06845	0.185249	0.0966946	0.104544	0.0634049	0.114942	0.0848781	0.192207	0.0321933	0.131408	0.0944944	0.0590681	0.0712324	0.363111	0.0291575	0.0297067
2002-03-27	0.191097	0.113867	0.0315876	0.139336	0.16384	0.242667	0.203488	0.272275	0.0848781	0.193843	0.0964519	0.0331556	0.161379	0.335139	0.131408	0.115226	0.172716	0.0944944	0.206089	0.11696	0.27181	0.0591181	0.0604454	0.363111	0.0291575	0.138228	0.119583	0.05684	0.0678167	0.0117111	0.103044	0.0764828	0.0453931	0.06845	0.185249	0.075665	0.104544	0.0634049	0.114942	0.0848781	0.192207	0.0321933	0.131408	0.0944944	0.0590681	0.0712324	0.363111	0.0291575	0.0297067
2002-03-28	0.191097	0.113867	0.0315876	0.139336	0.16384	0.242667	0.203488	0.272275	0.0848781	0.193843	0.0866519	0.0331556	0.161379	0.335139	0.131408	0.115226	0.172716	0.0944944	0.206089	0.11696	0.27181	0.0591181	0.0604454	0.363111	0.0291575	0.138228	0.119583	0.05684	0.0678167	0.0117111	0.103044	0.0764828	0.0453931	0.06845	0.185249	0.075665	0.104544	0.0634049	0.114942	0.0848781	0.192207	0.0321933	0.131408	0.0944944	0.0590681	0.0712324	0.363111	0.0291575	0.0297067
2002-03-29	0.119997	0.113867	0.0315876	0.139336	0.16384	0.242667	0.203488	0.272275	0.0848781	0.193843	0.0866519	0.0331556	0.161379	0.335139	0.131408	0.113804	0.172716	0.0944944	0.206089	0.11506	0.27181	0.0591181	0.0604454	0.363111	0.0291575	0.138228	0.119583	0.05684	0.0678167	0.0117111	0.103044	0.0764828	0.0453931	0.06845	0.184695	0.075665	0.104544	0.0631282	0.114942	0.0848781	0.192207	0.0321933	0.131408	0.0944944	0.0590681	0.0712324	0.363111	0.0291575	0.0297067
2002-03-30	0.119997	0.113867	0.0315876	0.139336	0.16384	0.242667	0.203488	0.272275	0.0848781	0.193843	0.0866519	0.0331556	0.161379	0.335139	0.131408	0.113804	0.172716	0.0944944	0.206089	0.11506	0.27181	0.0591181	0.0604454	0.363111	0.0291575	0.138228	0.119583	0.05684	0.0678167	0.0117111	0.103044	0.0764828	0.0453931	0.06845	0.184695	0.075665	0.104544	0.0631282	0.114942	0.0848781	0.192207	0.0321933	0.131408	0.0944944	0.0590681	0.0712324	0.363111	0.0291575	0.0297067
2002-03-31	0.119997	0.113867	0.0315876	0.139336	0.16384	0.242667	0.203488	0.272275	0.0848781	0.193843	0.0629519	0.0331556	0.161379	0.335139	0.131408	0.113804	0.172716	0.0944944	0.206089	0.11506	0.27181	0.0591181	0.0604454	0.363111	0.0291575	0.138228	0.119583	0.05684	0.0678167	0.0117111	0.103044	0.0764828	0.0453931	0.06845	0.184695	0.075665	0.104544	0.0631282	0.114942	0.0848781	0.192207	0.0321933	0.131408	0.0944944	0.0590681	0.0712324	0.363111	0.0291575	0.0297067
2002-04-01	0.119997	0.113867	0.0315876	0.139336	0.16384	0.242667	0.203488	0.271875	0.0848781	0.193843	0.0629519	0.0331556	0.159779	0.335139	0.131408	0.113804	0.172716	0.0944944	0.206089	0.11506	0.27181	0.0591181	0.0586363	0.363111	0.0291575	0.138228	0.119583	0.05684	0.0678167	0.0117111	0.103044	0.0764828	0.0453931	0.06845	0.184695	0.075665	0.104544	0.0605948	0.114942	0.0848781	0.192207	0.0321933	0.131408	0.0944944	0.0590681	0.0712324	0.363111	0.0291575	0.0297067
2002-04-02	0.119997	0.113867	0.0315876	0.139336	0.16384	0.242667	0.203488	0.271875	0.0848781	0.193843	0.0629519	0.0331556	0.159779	0.335139	0.131408	0.113804	0.172716	0.0944944	0.206089	0.11506	0.27181	0.0591181	0.0586363	0.363111	0.0291575	0.138228	0.119583	0.05684	0.0678167	0.0117111	0.103044	0.0764828	0.0453931	0.06845	0.184695	0.075665	0.104544	0.0605948	0.114942	0.0848781	0.192207	0.0321933	0.131408	0.0944944	0.0590681	0.0712324	0.363111	0.0291575	0.0297067
2002-04-03	0.119997	0.113867	0.0315876	0.139336	0.16384	0.242667	0.203488	0.271875	0.0848781	0.193843	0.0629519	0.0331556	0.159779	0.335139	0.131408	0.113804	0.172716	0.0944944	0.206089	0.11506	0.27181	0.0591181	0.0586363	0.363111	0.0291575	0.138228	0.119583	0.05684	0.0678167	0.0117111	0.103044	0.0764828	0.0453931	0.06845	0.184695	0.075665	0.104544	0.0605948	0.114942	0.0848781	0.192207	0.0321933	0.131408	0.0944944	0.0590681	0.0712324	0.363111	0.0291575	0.0297067
2002-04-04	0.119997	0.113867	0.0315876	0.139336	0.16384	0.242667	0.203488	0.271875	0.0848781	0.193843	0.0629519	0.0331556	0.159779	0.335139	0.131408	0.113804	0.172716	0.0944944	0.206089	0.11506	0.27181	0.0591181	0.0586363	0.363111	0.0291575	0.138228	0.119583	0.05684	0.0678167	0.0117111	0.103044	0.0764828	0.0453931	0.06845	0.184695	0.075665	0.104544	0.0605948	0.114942	0.0848781	0.192207	0.0321933	0.131408	0.0944944	0.0590681	0.0712324	0.363111	0.0291575	0.0297067
2002-04-05	0.119997	0.113867	0.0315876	0.139336	0.16384	0.242667	0.203488	0.271875	0.0848781	0.193843	0.0629519	0.0331556	0.159779	0.335139	0.131408	0.113804	0.172716	0.0944944	0.206089	0.11506	0.27181	0.0591181	0.0586363	0.363111	0.0291575	0.138228	0.119583	0.05684	0.0678167	0.0117111	0.103044	0.0764828	0.0453931	0.06845	0.184695	0.075665	0.104544	0.0605948	0.114942	0.0848781	0.192207	0.0321933	0.131408	0.0944944	0.0590681	0.0712324	0.363111	0.0291575	0.0297067
2002-04-06	0.119997	0.113867	0.0315876	0.139336	0.16384	0.242667	0.203488	0.271875	0.0848781	0.193843	0.0629519	0.0331556	0.159779	0.335139	0.131408	0.113804	0.172716	0.0944944	0.206089	0.11506	0.27181	0.0591181	0.0586363	0.363111	0.0291575	0.138228	0.119583	0.05684	0.0678167	0.0117111	0.103044	0.0764828	0.0453931	0.06845	0.184695	0.075665	0.104544	0.0605948	0.114942	0.0848781	0.192207	0.0321933	0.131408	0.0944944	0.0590681	0.0712324	0.363111	0.0291575	0.0297067
2002-04-07	0.119997	0.113867	0.0315876	0.139336	0.16384	0.242667	0.203488	0.271875	0.0848781	0.193843	0.0629519	0.0331556	0.159779	0.335139	0.131408	0.113804	0.172716	0.0944944	0.206089	0.11506	0.27181	0.0591181	0.0586363	0.363111	0.0291575	0.138228	0.119583	0.05684	0.0678167	0.0117111	0.103044	0.0764828	0.0469931	0.06845	0.184695	0.075665	0.104544	0.0605948	0.114942	0.0848781	0.192207	0.0321933	0.131408	0.0944944	0.0590681	0.0712324	0.363111	0.0291575	0.0297067
2002-04-08	0.119997	0.113867	0.0315876	0.139336	0.16384	0.242667	0.203488	0.271875	0.0848781	0.193843	0.0629519	0.0331556	0.159779	0.335139	0.131408	0.113804	0.172716	0.0944944	0.206089	0.11506	0.27181	0.0591181	0.0586363	0.363111	0.0291575	0.138228	0.119583	0.05684	0.0678167	0.0117111	0.103044	0.0764828	0.0469931	0.06845	0.184695	0.0765761	0.104544	0.0605948	0.114942	0.0848781	0.192207	0.0321933	0.131408	0.0944944	0.0590681	0.0712324	0.363111	0.0291575	0.0297067
2002-04-09	0.115197	0.113867	0.0315876	0.139336	0.16384	0.242667	0.203488	0.271875	0.0848781	0.193843	0.0629519	0.0331556	0.159779	0.335139	0.131408	0.113804	0.172716	0.0944944	0.206089	0.11506	0.27181	0.0591181	0.0586363	0.363111	0.0291575	0.138228	0.119583	0.05684	0.0678167	0.0117111	0.103044	0.0764828	0.0469931	0.06845	0.184695	0.0765761	0.104544	0.0605948	0.114942	0.0848781	0.192207	0.0331933	0.131408	0.0944944	0.0590681	0.0712324	0.363111	0.0291575	0.0297067
2002-04-10	0.115197	0.113867	0.0304162	0.139336	0.16384	0.242667	0.203488	0.271875	0.0848781	0.193843	0.0629519	0.0331556	0.159779	0.335139	0.131408	0.113804	0.172716	0.0944944	0.206089	0.11506	0.27181	0.0591181	0.0586363	0.363111	0.0291575	0.138228	0.119583	0.05684	0.0678167	0.0117111	0.103044	0.0764828	0.0469931	0.06845	0.184695	0.0765761	0.104544	0.0605948	0.114942	0.0848781	0.192207	0.0331933	0.131408	0.0944944	0.0590681	0.0712324	0.363111	0.0291575	0.0297067
2002-04-11	0.115197	0.113867	0.0304162	0.139336	0.16384	0.242667	0.203488	0.271875	0.0848781	0.193176	0.0629519	0.0331556	0.159779	0.335139	0.131408	0.113804	0.172716	0.0944944	0.206089	0.11506	0.27181	0.0591181	0.0586363	0.363111	0.0291575	0.138228	0.119583	0.05684	0.0678167	0.0117111	0.103044	0.0764828	0.0469931	0.06845	0.184695	0.0765761	0.104544	0.0605948	0.114942	0.0848781	0.192207	0.0331933	0.131408	0.0944944	0.0590681	0.0712324	0.363111	0.0291575	0.0297067
2002-04-12	0.115197	0.113867	0.0304162	0.139336	0.16384	0.242667	0.203488	0.271875	0.0848781	0.193176	0.0629519	0.0331556	0.159779	0.308073	0.131408	0.113804	0.170716	0.0944944	0.206089	0.11506	0.27181	0.0591181	0.0586363	0.363111	0.0291575	0.138228	0.119583	0.05684	0.0678167	0.0117111	0.103044	0.0764828	0.0469931	0.06845	0.184695	0.0765761	0.104544	0.0605948	0.114942	0.0848781	0.192207	0.0331933	0.131408	0.0944944	0.0590681	0.0712324	0.363111	0.0291575	0.0297067
2002-04-13	0.115197	0.113867	0.0304162	0.139336	0.16384	0.242667	0.203488	0.271875	0.0848781	0.193176	0.0629519	0.0331556	0.149779	0.308073	0.131408	0.113804	0.170716	0.0944944	0.206089	0.11506	0.27181	0.0591181	0.0586363	0.363111	0.0291575	0.138228	0.119583	0.05604	0.0678167	0.0117111	0.103044	0.0764828	0.0469931	0.06845	0.184695	0.0765761	0.104544	0.0605948	0.114942	0.0848781	0.192207	0.0331933	0.131408	0.0944944	0.0590681	0.0712324	0.363111	0.0291575	0.0297067
2002-04-14	0.115197	0.113867	0.0304162	0.139336	0.16384	0.242667	0.203488	0.271875	0.0848781	0.193176	0.0629519	0.0331556	0.149779	0.305771	0.131408	0.113804	0.169969	0.0944944	0.206089	0.11506	0.27181	0.0591181	0.0586363	0.363111	0.0291575	0.138228	0.119583	0.05604	0.0678167	0.0117111	0.103044	0.0764828	0.0469931	0.06845	0.184695	0.0765761	0.104544	0.0605948	0.114942	0.0848781	0.192207	0.0331933	0.131408	0.0944944	0.0590681	0.0712324	0.363111	0.0291575	0.0297067
2002-04-15	0.115197	0.113867	0.0304162	0.139336	0.16384	0.242667	0.203488	0.271875	0.0848781	0.193176	0.0629519	0.0331556	0.149779	0.305771	0.131408	0.113804	0.169969	0.0944944	0.206089	0.11506	0.27181	0.0591181	0.0586363	0.363111	0.0291575	0.138228	0.119583	0.05604	0.0678167	0.0117111	0.103044	0.0764828	0.0469931	0.06845	0.184695	0.0765761	0.104544	0.0605948	0.114942	0.0848781	0.192207	0.0331933	0.131408	0.0944944	0.0590681	0.0712324	0.363111	0.0291575	0.0297067
2002-04-16	0.115197	0.113867	0.0304162	0.139336	0.16384	0.242667	0.203488	0.271875	0.0848781	0.193176	0.0629519	0.0331556	0.149779	0.305771	0.131408	0.113804	0.169969	0.0944944	0.206089	0.162587	0.27181	0.0591181	0.0586363	0.363111	0.0291575	0.138228	0.119583	0.05604	0.0678167	0.0117111	0.103044	0.0764828	0.0469931	0.06845	0.184695	0.0765761	0.104544	0.0605948	0.114942	0.0848781	0.192207	0.0331933	0.131408	0.0944944	0.0590681	0.0712324	0.363111	0.0291575	0.0297067
2002-04-17	0.115197	0.113867	0.0304162	0.139336	0.16384	0.242667	0.203488	0.271875	0.0848781	0.193176	0.0629519	0.0331556	0.149779	0.305771	0.131408	0.113804	0.169969	0.0944944	0.206089	0.162587	0.27181	0.0591181	0.0586363	0.363111	0.0291575	0.138228	0.119583	0.05604	0.0678167	0.0117111	0.103044	0.0764828	0.0469931	0.06845	0.184695	0.0765761	0.104544	0.0605948	0.114942	0.0848781	0.192207	0.0331933	0.131408	0.0944944	0.0590681	0.0712324	0.363111	0.0291575	0.0297067
2002-04-18	0.115197	0.113867	0.0304162	0.139336	0.16384	0.242667	0.203488	0.271875	0.0848781	0.193176	0.0625577	0.0331556	0.149779	0.305771	0.131408	0.113804	0.169969	0.0944944	0.206089	0.162587	0.27181	0.0591181	0.0586363	0.363111	0.0291575	0.138228	0.119583	0.05604	0.0678167	0.0117111	0.103044	0.0764828	0.0469931	0.06845	0.128295	0.0765761	0.104544	0.0605948	0.114942	0.0848781	0.192207	0.0331933	0.131408	0.0944944	0.0590681	0.0712324	0.363111	0.0291575	0.0297067
2002-04-19	0.115197	0.113867	0.0304162	0.139336	0.16384	0.242667	0.203488	0.271875	0.0848781	0.193176	0.0625577	0.0331556	0.149779	0.305771	0.131408	0.113804	0.169969	0.0944944	0.206089	0.162587	0.27181	0.0591181	0.0586363	0.363111	0.0291575	0.138228	0.119583	0.05604	0.0678167	0.0117111	0.103044	0.0764828	0.0469931	0.06845	0.124695	0.0765761	0.104544	0.0605948	0.114942	0.0848781	0.192207	0.0331933	0.131408	0.0944944	0.0590681	0.0712324	0.363111	0.0291575	0.0297067
2002-04-20	0.115197	0.113867	0.0304162	0.139336	0.16384	0.242667	0.203488	0.271875	0.0848781	0.193176	0.0625577	0.0331556	0.149779	0.303327	0.131408	0.0614043	0.169969	0.0944944	0.206089	0.162587	0.27181	0.0591181	0.0586363	0.363111	0.0291575	0.138228	0.119583	0.05604	0.0678167	0.0117111	0.103044	0.0764828	0.0469931	0.06845	0.124695	0.0765761	0.104544	0.0605948	0.114942	0.0848781	0.192207	0.0331933	0.131408	0.0944944	0.0590681	0.0712324	0.363111	0.0291575	0.0297067
2002-04-21	0.115197	0.113867	0.0304162	0.139336	0.16384	0.242667	0.203488	0.271875	0.0848781	0.193176	0.0625577	0.0331556	0.149779	0.303327	0.131408	0.0614043	0.169969	0.0944944	0.206089	0.162587	0.27181	0.0591181	0.0586363	0.363111	0.0291575	0.138228	0.119583	0.05604	0.0678167	0.0117111	0.103044	0.0764828	0.0469931	0.06845	0.124695	0.0765761	0.104544	0.0605948	0.114062	0.0848781	0.18914	0.0331933	0.131408	0.0944944	0.0590681	0.0712324	0.363111	0.0291575	0.0297067
2002-04-22	0.115197	0.113867	0.0304162	0.139336	0.16384	0.242667	0.203488	0.271875	0.0848781	0.193176	0.0625577	0.0331556	0.149779	0.303327	0.131408	0.0614043	0.169969	0.0944944	0.206089	0.162587	0.27181	0.0591181	0.0586363	0.363111	0.0291575	0.138228	0.119583	0.05604	0.0678167	0.0117111	0.103044	0.0764828	0.0469931	0.06845	0.124695	0.0765761	0.104544	0.0605948	0.114062	0.0848781	0.18914	0.0331933	0.131408	0.0944944	0.0590681	0.0712324	0.363111	0.0291575	0.0297067
2002-04-23	0.115197	0.113867	0.0304162	0.139336	0.16384	0.242667	0.203488	0.271875	0.0848781	0.193176	0.0625577	0.0331556	0.148129	0.303327	0.131408	0.0614043	0.169969	0.0944944	0.206089	0.162587	0.26941	0.0591181	0.0586363	0.363111	0.0291575	0.138228	0.119583	0.05604	0.0678167	0.0117111	0.103044	0.0764828	0.0469931	0.06845	0.124695	0.0765761	0.104544	0.0605948	0.114062	0.0848781	0.18914	0.0331933	0.131408	0.0944944	0.0590681	0.0712324	0.363111	0.0291575	0.0297067
2002-04-24	0.115197	0.113867	0.0304162	0.138936	0.16384	0.242667	0.203288	0.271875	0.0848781	0.193176	0.0625577	0.0331556	0.148129	0.296171	0.131408	0.0614043	0.169969	0.0944944	0.206089	0.162587	0.26941	0.0591181	0.0586363	0.363111	0.0275718	0.138228	0.119583	0.05604	0.0678167	0.0117111	0.103044	0.0764828	0.0469931	0.06845	0.124695	0.0765761	0.104544	0.0605948	0.114062	0.0848781	0.18914	0.0331933	0.131408	0.0944944	0.0590681	0.0712324	0.363111	0.0291575	0.0297067
2002-04-25	0.115197	0.113867	0.0304162	0.138936	0.16384	0.242667	0.203288	0.271875	0.0848781	0.193176	0.0625577	0.0331556	0.148129	0.296171	0.131408	0.0612043	0.169969	0.0944944	0.206089	0.162587	0.26941	0.0591181	0.0586363	0.363111	0.0275718	0.138228	0.119583	0.05604	0.0678167	0.0117111	0.103044	0.0764828	0.0469931	0.06845	0.124695	0.0765761	0.104544	0.0605948	0.114062	0.0848781	0.18914	0.0331933	0.131408	0.0944944	0.0590681	0.0712324	0.363111	0.0291575	0.0297067
2002-04-26	0.115197	0.113867	0.0304162	0.138936	0.162066	0.242667	0.20224	0.271875	0.0848781	0.193176	0.0625577	0.0331556	0.148129	0.296171	0.131408	0.0612043	0.169969	0.0944944	0.206089	0.162587	0.26941	0.0591181	0.0586363	0.363111	0.0275718	0.138228	0.119583	0.05604	0.0678167	0.0117111	0.103044	0.0764828	0.0469931	0.06845	0.124695	0.0765761	0.104544	0.0605948	0.113662	0.0848781	0.18914	0.0331933	0.131408	0.0944944	0.0590681	0.0712324	0.363111	0.0291575	0.0297067
2002-04-27	0.115197	0.113867	0.0304162	0.138936	0.162066	0.241467	0.20224	0.271875	0.0848781	0.193176	0.0625577	0.0331556	0.148129	0.296171	0.131408	0.0612043	0.169969	0.0944944	0.206089	0.162587	0.26941	0.0591181	0.0586363	0.363111	0.0275718	0.138228	0.119583	0.05604	0.0678167	0.0117111	0.103044	0.0764828	0.0469931	0.06845	0.124695	0.0765761	0.104544	0.0605948	0.113662	0.0848781	0.18914	0.0331933	0.131408	0.0944944	0.0590681	0.0712324	0.363111	0.0291575	0.0297067
2002-04-28	0.115197	0.113867	0.0304162	0.138936	0.162066	0.241467	0.20224	0.271875	0.0848781	0.193176	0.0625577	0.0331556	0.148129	0.296171	0.131408	0.0531376	0.169969	0.0944944	0.206089	0.162587	0.26941	0.0591181	0.0586363	0.363111	0.0275718	0.138228	0.119583	0.05604	0.0678167	0.0117111	0.103044	0.0764828	0.0469931	0.06845	0.124695	0.0765761	0.104544	0.0605948	0.113662	0.0848781	0.18914	0.0331933	0.131408	0.0944944	0.0590681	0.0712324	0.363111	0.0291575	0.0297067
2002-04-29	0.115197	0.113867	0.0304162	0.138936	0.162066	0.241467	0.20224	0.271875	0.0848781	0.193176	0.0620577	0.0331556	0.148129	0.296171	0.131408	0.0531376	0.169969	0.0944944	0.206089	0.162587	0.26941	0.0591181	0.0586363	0.363111	0.0275718	0.138228	0.119583	0.05604	0.0678167	0.0117111	0.103044	0.0764828	0.0469931	0.06845	0.124695	0.0765761	0.104544	0.0605948	0.113662	0.0848781	0.18914	0.0331933	0.131408	0.0944944	0.0590681	0.0712324	0.363111	0.0291575	0.0297067
2002-04-30	0.115197	0.113867	0.0304162	0.138936	0.162066	0.241467	0.20224	0.271875	0.0848781	0.193176	0.0620577	0.0331556	0.148129	0.296171	0.131408	0.0531376	0.169969	0.0944944	0.206089	0.162587	0.26941	0.0591181	0.0586363	0.363111	0.0275718	0.138228	0.119583	0.05604	0.0678167	0.0117111	0.103044	0.0764828	0.0469931	0.06845	0.124695	0.0765761	0.104544	0.0605948	0.113662	0.0848781	0.18914	0.0331933	0.131408	0.0944944	0.0590681	0.0712324	0.363111	0.0291575	0.0297067
2002-05-01	0.115197	0.113387	0.0304162	0.138936	0.162066	0.241467	0.20224	0.271875	0.0848781	0.193176	0.0620577	0.0331556	0.148129	0.273504	0.131408	0.0531376	0.165035	0.0944944	0.206089	0.162587	0.26941	0.0591181	0.0586363	0.363111	0.0275718	0.138228	0.116489	0.05604	0.0678167	0.0117111	0.103044	0.0764828	0.0469931	0.06845	0.124695	0.0765761	0.104544	0.0605948	0.113662	0.0848781	0.18914	0.0331933	0.131408	0.0944944	0.0590681	0.0712324	0.363111	0.0291575	0.0297067
2002-05-02	0.115197	0.113387	0.0304162	0.138936	0.162066	0.241467	0.20224	0.270275	0.0848781	0.193176	0.0620577	0.0331556	0.148129	0.273504	0.131408	0.0531376	0.165035	0.0944944	0.206089	0.162587	0.26722	0.0591181	0.0586363	0.363111	0.0275718	0.138228	0.116489	0.05604	0.0678167	0.0117111	0.103044	0.0713464	0.0469931	0.06845	0.116295	0.0765761	0.104544	0.0605948	0.113662	0.0848781	0.18914	0.0331933	0.131408	0.0944944	0.0590681	0.0712324	0.363111	0.0291575	0.0297067
2002-05-03	0.115197	0.113387	0.0304162	0.138936	0.162066	0.241467	0.20224	0.270275	0.0848781	0.193176	0.0620577	0.0331556	0.148129	0.27235	0.131408	0.0531376	0.164399	0.0944944	0.206089	0.162587	0.257486	0.0591181	0.0586363	0.363111	0.0275718	0.138228	0.116489	0.05604	0.0678167	0.0117111	0.103044	0.0713464	0.0469931	0.06845	0.107295	0.0765761	0.104544	0.0605948	0.113662	0.0848781	0.18914	0.0328314	0.0998075	0.0944944	0.0590681	0.0712324	0.363111	0.0291575	0.0297067
2002-05-04	0.115197	0.113387	0.0304162	0.138936	0.162066	0.241467	0.20224	0.270275	0.0848781	0.193176	0.0620577	0.0331556	0.147329	0.27235	0.131408	0.0531376	0.164399	0.0944944	0.206089	0.162587	0.257486	0.0591181	0.0586363	0.363111	0.0275718	0.138228	0.116489	0.05604	0.0678167	0.0117111	0.103044	0.0713464	0.0469931	0.06845	0.107295	0.0765761	0.104544	0.0605948	0.113662	0.0848781	0.18914	0.0328314	0.0998075	0.0944944	0.0590681	0.0712324	0.363111	0.0291575	0.0297067
2002-05-05	0.115197	0.113387	0.0304162	0.138936	0.162066	0.241467	0.20224	0.270275	0.0848781	0.193176	0.0620577	0.0331556	0.147329	0.271636	0.131408	0.0528299	0.164399	0.0944944	0.206089	0.161183	0.257486	0.0590681	0.0586363	0.363111	0.0275718	0.138228	0.116329	0.05604	0.0678167	0.0117111	0.103044	0.0713464	0.0469931	0.06845	0.104795	0.0765761	0.104544	0.0602312	0.113662	0.0848781	0.18914	0.0601314	0.0998075	0.0944944	0.0590681	0.0712324	0.363111	0.0291575	0.0297067
2002-05-06	0.101797	0.113387	0.0304162	0.138936	0.162066	0.241467	0.20224	0.270275	0.0848781	0.193176	0.0620577	0.0331556	0.147329	0.271636	0.131408	0.0528299	0.164399	0.0944944	0.206089	0.161183	0.251782	0.0590681	0.0586363	0.363111	0.0275718	0.138228	0.116329	0.05604	0.0678167	0.0117111	0.103044	0.0713464	0.0469931	0.06845	0.104795	0.0765761	0.104544	0.0602312	0.113662	0.0848781	0.189007	0.0601314	0.0998075	0.0944944	0.0590681	0.0712324	0.363111	0.0291575	0.0297067
2002-05-07	0.101797	0.113387	0.0304162	0.138936	0.162066	0.241467	0.198063	0.270275	0.0848781	0.193176	0.0620577	0.0331556	0.137729	0.271636	0.131408	0.0523	0.164399	0.0944944	0.206089	0.161183	0.251782	0.0590681	0.0586363	0.363111	0.0275718	0.138228	0.108072	0.05604	0.0676167	0.0117111	0.103044	0.0713464	0.0469931	0.06845	0.104795	0.0765761	0.104544	0.0602312	0.113662	0.0848781	0.189007	0.0601314	0.0998075	0.0944944	0.0590681	0.0712324	0.363111	0.0291575	0.0297067
2002-05-08	0.101797	0.113387	0.0304162	0.138936	0.162066	0.241467	0.198063	0.270275	0.0848781	0.193176	0.0620577	0.0331556	0.137729	0.271636	0.131408	0.0523	0.164399	0.0944944	0.206089	0.161183	0.251782	0.0590681	0.0586363	0.363111	0.0275718	0.132708	0.108072	0.05604	0.0676167	0.0117111	0.103044	0.0713464	0.0469931	0.06845	0.104795	0.0765761	0.104544	0.0602312	0.113662	0.0848781	0.189007	0.0601314	0.0998075	0.0944944	0.0590681	0.0712324	0.363111	0.0291575	0.0297067
2002-05-09	0.101797	0.113387	0.0304162	0.138936	0.162066	0.241467	0.198063	0.270275	0.0848781	0.193176	0.0620577	0.0331556	0.137729	0.271636	0.131226	0.0467	0.164399	0.0944944	0.206089	0.161183	0.251782	0.0590681	0.0586363	0.363111	0.0275718	0.132708	0.108072	0.05604	0.0676167	0.0117111	0.103044	0.0713464	0.0469931	0.06845	0.104795	0.0765761	0.104544	0.0602312	0.112862	0.0848781	0.189007	0.0601314	0.0996257	0.0944944	0.0590681	0.0712324	0.363111	0.0291575	0.0297067
2002-05-10	0.101797	0.113387	0.0304162	0.138936	0.162066	0.241467	0.198063	0.267475	0.0848781	0.193176	0.0620577	0.0331556	0.136929	0.271636	0.131226	0.0467	0.164399	0.0944944	0.206089	0.161183	0.243382	0.0590681	0.0586363	0.363111	0.0275718	0.132708	0.108072	0.05604	0.0676167	0.0117111	0.103044	0.0713464	0.0469931	0.06845	0.104795	0.0765761	0.104544	0.0602312	0.112862	0.0848781	0.189007	0.0601314	0.0996257	0.0944944	0.0590681	0.0712324	0.363111	0.0291575	0.0297067
2002-05-11	0.101797	0.113387	0.0304162	0.138936	0.162066	0.241467	0.198063	0.267475	0.0848781	0.193176	0.0620577	0.0331556	0.136929	0.271636	0.131226	0.0435	0.164399	0.0944944	0.206089	0.160734	0.243382	0.0590681	0.0586363	0.363111	0.0275718	0.132708	0.108072	0.05604	0.0676167	0.0117111	0.103044	0.0713464	0.0469931	0.06845	0.104795	0.0765761	0.103878	0.0602312	0.112862	0.0848781	0.189007	0.0601314	0.0996257	0.0944944	0.0590681	0.0712324	0.363111	0.0291575	0.0297067
2002-05-12	0.101797	0.113387	0.0304162	0.138936	0.162066	0.241467	0.198063	0.267475	0.0848781	0.193176	0.0620577	0.0331556	0.136929	0.271636	0.131226	0.0435	0.164399	0.0944944	0.206089	0.160734	0.243382	0.0590681	0.0576836	0.347111	0.0275718	0.132708	0.108072	0.05604	0.0676167	0.0117111	0.103044	0.0713464	0.0469931	0.06845	0.104795	0.0765761	0.103878	0.0602312	0.112862	0.0848781	0.189007	0.0601314	0.096959	0.0944944	0.0587214	0.0712324	0.363111	0.0291575	0.0297067
2002-05-13	0.101797	0.113387	0.0304162	0.138936	0.165533	0.175467	0.195213	0.267475	0.0848781	0.193176	0.0620577	0.0331556	0.136929	0.271636	0.131226	0.0435	0.164399	0.0944944	0.206089	0.160734	0.243382	0.0590681	0.0576836	0.347111	0.0275718	0.132708	0.108072	0.05604	0.0676167	0.0117111	0.103044	0.0713464	0.0469931	0.06845	0.104795	0.0765761	0.103878	0.0602312	0.112862	0.0848781	0.189007	0.0601314	0.096959	0.0944944	0.0585614	0.0712324	0.363111	0.0291575	0.0297067
2002-05-14	0.101797	0.113387	0.0304162	0.138936	0.165533	0.175467	0.195213	0.267475	0.0848781	0.193176	0.0620577	0.0331556	0.135354	0.271636	0.131226	0.0435	0.164399	0.0944944	0.199982	0.160734	0.218248	0.0590681	0.0576836	0.347111	0.0275718	0.132708	0.108072	0.05604	0.0676167	0.0117111	0.103044	0.0713464	0.0469931	0.06845	0.104795	0.0765761	0.103878	0.0602312	0.112862	0.0848781	0.189007	0.0601314	0.096959	0.0944944	0.0585614	0.0712324	0.363111	0.0291575	0.0297067
2002-05-15	0.091797	0.113387	0.0304162	0.138936	0.165533	0.175467	0.195213	0.267475	0.0848781	0.193176	0.0620577	0.0331556	0.135354	0.270391	0.131226	0.0435	0.164399	0.0944944	0.199982	0.160734	0.218248	0.0590681	0.0576836	0.347111	0.0275718	0.132708	0.108072	0.05604	0.0676167	0.0117111	0.103044	0.0713464	0.0469931	0.06845	0.104795	0.0765761	0.103878	0.0602312	0.112862	0.0848781	0.189007	0.0601314	0.096959	0.0944944	0.0585614	0.0712324	0.363111	0.0291575	0.0297067
2002-05-16	0.091797	0.113387	0.0304162	0.138936	0.165533	0.175467	0.194493	0.267475	0.0848781	0.193176	0.0620577	0.0331556	0.135354	0.270391	0.131226	0.0435	0.164399	0.0944944	0.199982	0.160734	0.218248	0.0590681	0.0576836	0.347111	0.0275718	0.132708	0.108072	0.05604	0.0676167	0.0117111	0.103044	0.0713464	0.0469931	0.06845	0.104795	0.0765761	0.103878	0.0602312	0.112862	0.0848781	0.185651	0.0601314	0.096959	0.0944944	0.0585614	0.0712324	0.363111	0.0291575	0.0297067
2002-05-17	0.091797	0.113387	0.0304162	0.138936	0.165533	0.175467	0.194493	0.267475	0.0848781	0.193176	0.0620577	0.0331556	0.135354	0.270391	0.131226	0.0435	0.164399	0.0944944	0.199982	0.160734	0.218248	0.0590681	0.0576836	0.347111	0.0275718	0.132708	0.108072	0.05604	0.0676167	0.0117111	0.103044	0.0713464	0.0469931	0.06845	0.0857949	0.0765761	0.103878	0.0602312	0.112862	0.0848781	0.185651	0.0601314	0.096959	0.0944944	0.0585614	0.0712324	0.363111	0.0291575	0.0297067
2002-05-18	0.094297	0.113387	0.0304162	0.138936	0.165533	0.175467	0.194493	0.267475	0.0848781	0.193176	0.0620577	0.0331556	0.135354	0.218169	0.131226	0.0435	0.142711	0.0944944	0.199982	0.160734	0.218248	0.0590681	0.0576836	0.347111	0.0275718	0.132708	0.107626	0.05604	0.0676167	0.0117111	0.103044	0.0713464	0.0469931	0.06845	0.0857949	0.0765761	0.103878	0.0602312	0.112862	0.0848781	0.185318	0.0601314	0.096959	0.0944944	0.0585614	0.0712324	0.363111	0.0291575	0.0297067
2002-05-19	0.094297	0.113387	0.0304162	0.138936	0.165533	0.175467	0.194493	0.267475	0.0848781	0.193176	0.0620577	0.0331556	0.135354	0.218169	0.131226	0.0435	0.142711	0.0944944	0.199982	0.160734	0.218248	0.0590681	0.0576836	0.347111	0.0275718	0.132708	0.107626	0.05604	0.0676167	0.0117111	0.103044	0.0713464	0.0469931	0.06845	0.0857949	0.0765761	0.103878	0.0602312	0.111822	0.0848781	0.185318	0.0601314	0.096959	0.0944944	0.0585614	0.0712324	0.363111	0.0291575	0.0297067
2002-05-20	0.094297	0.113387	0.0304162	0.138936	0.165533	0.175467	0.194493	0.267475	0.0848781	0.193176	0.0620577	0.0331556	0.135354	0.218169	0.131226	0.0435	0.142711	0.0944944	0.199982	0.160134	0.213359	0.0590681	0.0576836	0.347111	0.0275718	0.132708	0.107626	0.05604	0.0676167	0.0117111	0.103044	0.0713464	0.0469931	0.06845	0.0855949	0.0765761	0.103878	0.0602312	0.111822	0.0848781	0.185318	0.0601314	0.096959	0.0944944	0.0585614	0.0712324	0.363111	0.0291575	0.0297067
2002-05-21	0.094297	0.113387	0.0304162	0.138936	0.165379	0.175467	0.194493	0.267475	0.0848781	0.193176	0.0620577	0.0331556	0.135354	0.218169	0.131226	0.0431923	0.142711	0.0944944	0.199982	0.160134	0.21082	0.0590681	0.0576836	0.347111	0.0275718	0.132708	0.107626	0.05604	0.0676167	0.0117111	0.101911	0.0713464	0.0469931	0.06845	0.0855949	0.0765761	0.103878	0.0602312	0.111822	0.0848781	0.152163	0.0601314	0.096959	0.0918891	0.0585614	0.0712324	0.363111	0.0291575	0.0297067
2002-05-22	0.094297	0.113387	0.0304162	0.138936	0.165379	0.1748	0.194493	0.267475	0.0848781	0.193176	0.0616958	0.0331556	0.135354	0.217471	0.131226	0.0431923	0.142253	0.0944944	0.199982	0.155577	0.21082	0.0590681	0.0576836	0.347111	0.0275718	0.132708	0.107364	0.05604	0.0676167	0.0117111	0.101911	0.0713464	0.0469931	0.06845	0.082441	0.0765761	0.103878	0.0602312	0.111822	0.0848781	0.152163	0.0601314	0.096959	0.0918891	0.0585614	0.0712324	0.363111	0.0291575	0.0297067
2002-05-23	0.094297	0.113387	0.0304162	0.138936	0.165379	0.1748	0.194493	0.267475	0.0848781	0.193176	0.0409958	0.0331556	0.135354	0.217471	0.131226	0.0431923	0.142253	0.0944944	0.199982	0.155577	0.21082	0.0439214	0.0576836	0.347111	0.0275718	0.132708	0.107364	0.05604	0.0676167	0.0117111	0.101911	0.0713464	0.0469931	0.06845	0.082441	0.0765761	0.103878	0.0602312	0.111822	0.0848781	0.152163	0.0601314	0.096959	0.0918891	0.0585614	0.0712324	0.363111	0.0291575	0.0297067
2002-05-24	0.094297	0.113387	0.0304162	0.138936	0.157779	0.1748	0.194493	0.267475	0.0848781	0.193176	0.04139	0.0331556	0.135354	0.217471	0.131226	0.0431923	0.142253	0.0944944	0.199982	0.155577	0.204331	0.0434147	0.0576836	0.347111	0.0275718	0.132708	0.107364	0.05604	0.0676167	0.0117111	0.101911	0.0713464	0.0469931	0.06845	0.082441	0.0765761	0.103878	0.0602312	0.111822	0.0848781	0.152163	0.0601314	0.096959	0.0918891	0.0585614	0.0712324	0.363111	0.0291575	0.0297067
2002-05-25	0.091097	0.113387	0.0304162	0.138936	0.157779	0.1748	0.194493	0.267475	0.0848781	0.193176	0.04139	0.0331556	0.135354	0.217471	0.131226	0.0431923	0.142253	0.0944944	0.199982	0.155577	0.204331	0.0434147	0.0576836	0.347111	0.0275718	0.132708	0.107364	0.05604	0.0676167	0.0117111	0.101911	0.0713464	0.0469931	0.06845	0.082441	0.0765761	0.103878	0.0602312	0.111822	0.0848781	0.152163	0.0601314	0.096959	0.0918891	0.0585614	0.0712324	0.363111	0.0291575	0.0297067
2002-05-26	0.0904545	0.113387	0.0304162	0.138936	0.157779	0.1748	0.194493	0.267475	0.0848781	0.193176	0.04139	0.0331556	0.135354	0.217471	0.131226	0.0431923	0.142253	0.0944944	0.199982	0.155577	0.204331	0.0434147	0.0576836	0.347111	0.0275718	0.132708	0.107364	0.05604	0.0377833	0.0117111	0.101911	0.0713464	0.0469931	0.06845	0.082441	0.0765761	0.103878	0.0602312	0.111822	0.0848781	0.152163	0.0601314	0.096959	0.0918891	0.0585614	0.0694233	0.363111	0.0291575	0.0297067
2002-05-27	0.0904545	0.113387	0.0304162	0.138936	0.157779	0.1748	0.194493	0.267475	0.0848781	0.193176	0.04139	0.0331556	0.134854	0.217471	0.131226	0.040259	0.142253	0.0944944	0.199982	0.15459	0.204331	0.0434147	0.0576836	0.347111	0.0275718	0.0948922	0.107364	0.05604	0.0377833	0.0117111	0.101911	0.0713464	0.0469931	0.06845	0.082441	0.0765761	0.103878	0.0602312	0.111822	0.0848781	0.152163	0.0601314	0.096959	0.0918891	0.0585614	0.0694233	0.363111	0.0291575	0.0297067
2002-05-28	0.0754545	0.113387	0.0304162	0.138936	0.157779	0.1748	0.194493	0.267475	0.0848781	0.193176	0.04139	0.0331556	0.134854	0.217471	0.131226	0.0314179	0.142253	0.0944944	0.199982	0.15459	0.204331	0.0434147	0.0576836	0.347111	0.0275718	0.0948922	0.107364	0.05604	0.0377833	0.0117111	0.101911	0.0713464	0.0469931	0.06845	0.082441	0.0765761	0.103878	0.0602312	0.111822	0.0848781	0.152163	0.0601314	0.096959	0.0918891	0.0585614	0.0694233	0.363111	0.0291575	0.0297067
2002-05-29	0.0754545	0.113387	0.0304162	0.138936	0.157779	0.1748	0.194493	0.232396	0.0848781	0.193176	0.04139	0.0331556	0.134854	0.217471	0.131226	0.0314179	0.142253	0.0944944	0.199982	0.15459	0.204331	0.0434147	0.0576836	0.347111	0.0275718	0.0948922	0.107364	0.05604	0.0377833	0.0117111	0.101911	0.0713464	0.0469931	0.06845	0.082441	0.0765761	0.103878	0.0602312	0.111822	0.0848781	0.152163	0.0601314	0.096959	0.0918891	0.0585614	0.0694233	0.363111	0.0291575	0.0297067
2002-05-30	0.0754545	0.113387	0.0304162	0.138936	0.157779	0.1508	0.194493	0.232396	0.0848781	0.193176	0.04139	0.0331556	0.134854	0.217471	0.131226	0.0314179	0.142253	0.0944944	0.199982	0.15459	0.204331	0.0434147	0.0576836	0.347111	0.0275718	0.0948922	0.107364	0.05604	0.0343167	0.0117111	0.101911	0.0713464	0.0469931	0.06845	0.082441	0.0765761	0.103878	0.0602312	0.111822	0.0848781	0.152163	0.0601314	0.096959	0.0918891	0.0585614	0.0694233	0.363111	0.0291575	0.0297067
2002-05-31	0.0754545	0.113387	0.0304162	0.138936	0.157779	0.1508	0.194493	0.232396	0.0848781	0.193176	0.04139	0.0331556	0.134854	0.217471	0.131226	0.0314179	0.142253	0.0944944	0.199982	0.15459	0.229465	0.0434147	0.0576836	0.347111	0.0275718	0.0948922	0.107364	0.05604	0.0343167	0.0117111	0.0940444	0.0713464	0.0469931	0.06845	0.082441	0.0765761	0.103878	0.0598437	0.111822	0.0848781	0.152163	0.0601314	0.096959	0.0918891	0.0585614	0.0694233	0.363111	0.0291575	0.0297067
2002-06-01	0.0754545	0.113387	0.0304162	0.138936	0.157779	0.1508	0.194493	0.232396	0.0848781	0.193176	0.04139	0.0331556	0.134854	0.217471	0.131226	0.0314179	0.142253	0.0944944	0.123582	0.15459	0.229465	0.0434147	0.0576836	0.347111	0.0275718	0.0948922	0.107364	0.05604	0.0343167	0.0117111	0.0940444	0.0713464	0.0469931	0.06845	0.082441	0.0765761	0.103878	0.0598437	0.111822	0.0848781	0.152163	0.0601314	0.0965781	0.0918891	0.0585614	0.0694233	0.363111	0.0291575	0.0297067
2002-06-02	0.0754545	0.113387	0.0304162	0.138936	0.157779	0.1508	0.194493	0.232396	0.0848781	0.18651	0.04139	0.0331556	0.134854	0.217471	0.131226	0.0314179	0.142253	0.0944944	0.123582	0.15459	0.227243	0.0434147	0.0576836	0.344444	0.0275718	0.0948922	0.107364	0.05604	0.0343167	0.0117111	0.0938444	0.0713464	0.0469931	0.06845	0.082441	0.0765761	0.103778	0.0598437	0.111822	0.0848781	0.152163	0.0601314	0.0793781	0.0918891	0.0585614	0.0694233	0.363111	0.0291575	0.0297067
2002-06-03	0.0754545	0.113387	0.0304162	0.138936	0.157779	0.1508	0.194493	0.232396	0.0848781	0.18651	0.04139	0.0331556	0.134854	0.217471	0.131226	0.0314179	0.142253	0.0944944	0.123582	0.15459	0.227243	0.0434147	0.0576836	0.344444	0.0275718	0.0948922	0.091737	0.05604	0.0343167	0.0117111	0.0938444	0.0713464	0.0469931	0.06845	0.082441	0.0765761	0.103778	0.0598437	0.111822	0.0848781	0.152163	0.0601314	0.0793781	0.0918891	0.0585614	0.0694233	0.363111	0.0291575	0.0297067
2002-06-04	0.0754545	0.113387	0.0304162	0.138936	0.157779	0.1508	0.194493	0.232396	0.0848781	0.18651	0.04139	0.0331556	0.134854	0.213604	0.131226	0.0314179	0.140642	0.0944944	0.123582	0.15459	0.202109	0.0434147	0.0576836	0.344444	0.0275718	0.0948922	0.091737	0.05604	0.0343167	0.0117111	0.0940444	0.0713464	0.0469931	0.06845	0.082441	0.0765761	0.103778	0.0598437	0.111822	0.0848781	0.144785	0.0601314	0.0793781	0.0918891	0.0585614	0.0694233	0.363111	0.0291575	0.0297067
2002-06-05	0.0754545	0.113387	0.0304162	0.138936	0.157779	0.1508	0.194493	0.232396	0.0848781	0.18651	0.04139	0.0331556	0.134854	0.213604	0.131226	0.0314179	0.140642	0.0944944	0.123582	0.15459	0.150275	0.0434147	0.0571181	0.344444	0.0275718	0.0948922	0.0718255	0.05604	0.0343167	0.0117111	0.0940444	0.0713464	0.0469931	0.06845	0.081641	0.0765761	0.103778	0.061577	0.111822	0.0848781	0.144785	0.0601314	0.0793781	0.0918891	0.0585614	0.0694233	0.363111	0.0291575	0.0297067
2002-06-06	0.0754545	0.113387	0.0304162	0.138936	0.157779	0.1508	0.194493	0.232396	0.0848781	0.18651	0.0403233	0.0331556	0.134854	0.213604	0.131226	0.0314179	0.140642	0.0944944	0.123582	0.15459	0.150275	0.0403747	0.0571181	0.344444	0.0275718	0.0948922	0.0718255	0.05604	0.0343167	0.0117111	0.0940444	0.0693464	0.0469931	0.06845	0.081641	0.0765761	0.103778	0.061577	0.111822	0.0848781	0.144785	0.0601314	0.0793781	0.0918891	0.0585614	0.0694233	0.363111	0.0291575	0.0297067
2002-06-07	0.0754545	0.113387	0.0304162	0.138936	0.157779	0.1508	0.194493	0.232396	0.0848781	0.185694	0.0403233	0.0331556	0.134854	0.192493	0.131226	0.0314179	0.121564	0.0944944	0.123582	0.15459	0.144337	0.0403747	0.0571181	0.344444	0.0275718	0.0948922	0.0718255	0.05604	0.0343167	0.0117111	0.0940444	0.0693464	0.0469931	0.06845	0.081641	0.0765761	0.103778	0.061577	0.111822	0.0848781	0.144785	0.0601314	0.0793781	0.0918891	0.0585614	0.0694233	0.363111	0.0291575	0.0297067
2002-06-08	0.0494545	0.113387	0.0304162	0.138936	0.157779	0.1508	0.194493	0.232396	0.0848781	0.185694	0.0403233	0.0331556	0.134854	0.0551595	0.131226	0.0314179	0.0390977	0.0944944	0.123582	0.15459	0.144337	0.0403747	0.0571181	0.344444	0.0275718	0.0948922	0.0611055	0.05604	0.0343167	0.0117111	0.0940444	0.0693464	0.0469931	0.06845	0.081641	0.0765761	0.103778	0.061577	0.111822	0.0848781	0.144785	0.0601314	0.0793781	0.0918891	0.0585614	0.0694233	0.363111	0.0291575	0.0297067
2002-06-09	0.0494545	0.113387	0.0304162	0.138936	0.157779	0.1508	0.194493	0.232396	0.0848781	0.185694	0.0403233	0.0331556	0.134854	0.0551595	0.131226	0.0314179	0.0390977	0.0944944	0.123582	0.15459	0.144337	0.0403747	0.0571181	0.344444	0.0275718	0.0948922	0.0449188	0.05604	0.0343167	0.0117111	0.0940444	0.0693464	0.0469931	0.06845	0.081641	0.0765761	0.103778	0.061577	0.111822	0.0848781	0.144785	0.0601314	0.0793781	0.0918891	0.0585614	0.0694233	0.363111	0.0291575	0.0297067
2002-06-10	0.0494545	0.113387	0.0304162	0.138936	0.157779	0.1508	0.194493	0.200643	0.0848781	0.185694	0.0399804	0.0331556	0.134854	0.0551595	0.131226	0.0314179	0.0390977	0.0944944	0.117182	0.15459	0.144337	0.0403747	0.0571181	0.344444	0.0268789	0.0948922	0.0449188	0.05604	0.0343167	0.0117111	0.0940444	0.0693464	0.0469931	0.06845	0.081641	0.0765761	0.103778	0.0500326	0.111822	0.0848781	0.144785	0.0601314	0.0793781	0.0918891	0.0585614	0.0694233	0.363111	0.0291575	0.0297067
2002-06-11	0.0494545	0.113227	0.0304162	0.138936	0.156046	0.1508	0.194493	0.200643	0.0848781	0.185694	0.0399804	0.0331556	0.134854	0.0551595	0.131226	0.0314179	0.0385262	0.0944944	0.117182	0.15459	0.144337	0.0403747	0.0571181	0.344444	0.0268789	0.0948922	0.0449188	0.05604	0.0343167	0.0117111	0.0940444	0.0693464	0.0469931	0.06845	0.073241	0.0765761	0.103778	0.0500326	0.111822	0.0848781	0.144785	0.0601314	0.0793781	0.0918891	0.0585614	0.0694233	0.363111	0.0291575	0.0297067
2002-06-12	0.0494545	0.113227	0.0304162	0.138936	0.156046	0.1504	0.194493	0.200643	0.0848781	0.185694	0.0399804	0.0331556	0.134854	0.0551595	0.131226	0.0314179	0.0385262	0.0699399	0.117182	0.15459	0.144337	0.0403747	0.0600109	0.344444	0.0268789	0.0948922	0.0449188	0.05604	0.0343167	0.0117111	0.0940444	0.0693464	0.0469931	0.06845	0.073241	0.0765761	0.103778	0.0500326	0.111822	0.0848781	0.144785	0.0601314	0.0793781	0.0918891	0.0585614	0.0694233	0.363111	0.0291575	0.0297067
2002-06-13	0.0494545	0.113227	0.0304162	0.138936	0.156046	0.115733	0.191393	0.200643	0.0848781	0.185694	0.0399804	0.0331556	0.134854	0.0551595	0.131226	0.0284179	0.0385262	0.0699399	0.117182	0.151608	0.144337	0.0403747	0.0600109	0.344444	0.0268789	0.0747322	0.0449188	0.05604	0.0343167	0.0117111	0.0940444	0.0693464	0.0469931	0.06845	0.073241	0.0765761	0.103778	0.0500326	0.111822	0.0795765	0.144785	0.0601314	0.0793781	0.0918891	0.0585614	0.0694233	0.363111	0.0291575	0.0297067
2002-06-14	0.0494545	0.113227	0.0304162	0.138936	0.155646	0.115733	0.191393	0.200643	0.0846114	0.185561	0.0399804	0.0331556	0.134854	0.0488039	0.131226	0.0284179	0.0351262	0.0699399	0.117182	0.151608	0.144337	0.0357347	0.0600109	0.344444	0.0268789	0.0747322	0.0449188	0.05604	0.0343167	0.0117111	0.0940444	0.0693464	0.0469931	0.06845	0.073241	0.0765761	0.103778	0.0500326	0.111822	0.0795765	0.144785	0.0601314	0.0793781	0.0918891	0.0585614	0.0694233	0.363111	0.0291575	0.0297067
2002-06-15	0.0494545	0.113227	0.0304162	0.138936	0.155646	0.115733	0.191393	0.200643	0.0846114	0.185561	0.0399804	0.0331556	0.134854	0.0488039	0.131226	0.0276179	0.0351262	0.0699399	0.117182	0.151608	0.144337	0.0357347	0.0600109	0.344444	0.0268789	0.0480922	0.0449188	0.05604	0.0343167	0.0117111	0.0940444	0.0693464	0.0469931	0.06845	0.00764103	0.0765761	0.103778	0.0500326	0.111822	0.0795765	0.144785	0.0601314	0.0793781	0.0918891	0.0585614	0.0694233	0.363111	0.0291575	0.0297067
2002-06-16	0.0494545	0.113227	0.0304162	0.138936	0.155646	0.115733	0.191393	0.200643	0.0846114	0.185561	0.0399804	0.0331556	0.134854	0.0488039	0.131226	0.0260513	0.0351262	0.0699399	0.117182	0.151608	0.144337	0.0357347	0.0600109	0.344444	0.0268789	0.0480922	0.0449188	0.05604	0.0343167	0.0117111	0.0940444	0.0693464	0.0469931	0.06845	0.00764103	0.0765761	0.103778	0.0500326	0.111822	0.0795765	0.138118	0.0601314	0.0793781	0.0918891	0.0585614	0.0694233	0.363111	0.0291575	0.0297067
2002-06-17	0.0442545	0.112827	0.0304162	0.138936	0.155646	0.115733	0.191393	0.200643	0.0846114	0.18488	0.0399804	0.0331556	0.134854	0.0488039	0.131226	0.0260513	0.0351262	0.0699399	0.0493156	0.151608	0.144337	0.0357347	0.0600109	0.344444	0.0268789	0.0236922	0.0449188	0.05604	0.0343167	0.0117111	0.0940444	0.0561176	0.0469931	0.06845	0.00764103	0.0765761	0.103778	0.0500326	0.111822	0.0795765	0.138118	0.0601314	0.0793781	0.0918891	0.0585614	0.0694233	0.347111	0.0291575	0.0297067
2002-06-18	0.0442545	0.112827	0.0304162	0.138936	0.155646	0.113733	0.191393	0.200643	0.0846114	0.18488	0.0399804	0.0331556	0.134854	0.0488039	0.131226	0.0260513	0.0351262	0.0699399	0.0493156	0.151608	0.144337	0.0357347	0.0600109	0.344444	0.0268789	0.0236922	0.0449188	0.05604	0.0191167	0.0117111	0.0940444	0.0561176	0.0469931	0.06845	0.00764103	0.0765761	0.103778	0.0500326	0.111822	0.0795765	0.138118	0.0601314	0.0793781	0.0918891	0.0585614	0.0694233	0.347111	0.0291575	0.0297067
2002-06-19	0.0442545	0.112827	0.0304162	0.138936	0.155646	0.105067	0.191393	0.194221	0.0846114	0.18488	0.0399804	0.0331556	0.134854	0.0488039	0.131226	0.0260513	0.0351262	0.0699399	0.0493156	0.151608	0.124053	0.0357347	0.0600109	0.344444	0.0268789	0.0236922	0.0449188	0.05604	0.0191167	0.0117111	0.0940444	0.0561176	0.0469931	0.06845	0.00764103	0.0765761	0.103778	0.0500326	0.111822	0.0795765	0.138118	0.0601314	0.0793781	0.0918891	0.0585614	0.0694233	0.347111	0.0291575	0.0297067
2002-06-20	0.0442545	0.112827	0.0304162	0.138936	0.155646	0.105067	0.191393	0.194221	0.0789734	0.133458	0.0399804	0.0331556	0.133804	0.0488039	0.131226	0.0260513	0.0351262	0.0699399	0.0493156	0.151608	0.124053	0.0357347	0.0600109	0.344444	0.0268789	0.0236922	0.0119055	0.05604	0.0191167	0.0117111	0.0940444	0.0561176	0.0469931	0.067275	0.00724103	0.0765761	0.103778	0.0500326	0.111822	0.0795765	0.138118	0.0601314	0.0793781	0.0918891	0.0585614	0.0694233	0.347111	0.0291575	0.0297067
2002-06-21	0.0442545	0.112827	0.0304162	0.137896	0.155646	0.105067	0.191393	0.194221	0.0789734	0.133458	0.0399804	0.0331556	0.133804	0.0488039	0.131226	0.0260513	0.0351262	0.0699399	0.0493156	0.127608	0.112942	0.0357347	0.0600109	0.344444	0.0268789	0.0236922	0.0119055	0.05604	0.0191167	0.0117111	0.0936444	0.0561176	0.0469931	0.067275	0.00724103	0.0765761	0.103778	0.0500326	0.111822	0.0795765	0.138118	0.0601314	0.0793781	0.0918891	0.0585614	0.0694233	0.347111	0.0291575	0.0297067
2002-06-22	0.0442545	0.112827	0.0304162	0.137896	0.155646	0.105067	0.191393	0.194221	0.0789734	0.133458	0.0399804	0.0331556	0.133804	0.0488039	0.131226	0.0260513	0.0351262	0.0699399	0.0493156	0.127608	0.112942	0.0357347	0.0600109	0.344444	0.0268789	0.0236922	0.0119055	0.05604	0.0191167	0.0117111	0.0936444	0.0561176	0.0469931	0.067275	0.00724103	0.0765761	0.103778	0.0500326	0.111822	0.0795765	0.138118	0.0601314	0.0793781	0.0918891	0.0585614	0.0694233	0.344444	0.0291575	0.0297067
2002-06-23	0.0381	0.112827	0.0304162	0.137896	0.155492	0.105067	0.191393	0.194221	0.0786114	0.133458	0.0399804	0.0331556	0.133804	0.0478754	0.131226	0.0260513	0.0351262	0.0699399	0.0493156	0.127608	0.112942	0.0357347	0.0600109	0.344444	0.0268789	0.0236922	0.0119055	0.05604	0.0191167	0.0117111	0.0936444	0.0561176	0.0469931	0.067275	0.00724103	0.0765761	0.103778	0.0500326	0.111822	0.0795765	0.138118	0.0601314	0.0793781	0.0918891	0.0585614	0.0694233	0.344444	0.0291575	0.0297067
2002-06-24	0.0381	0.112827	0.0304162	0.137896	0.155492	0.105067	0.191393	0.181195	0.0786114	0.133458	0.0399804	0.0331556	0.133804	0.046542	0.131226	0.0260513	0.0351262	0.0699399	0.0493156	0.125002	0.112942	0.0357347	0.0600109	0.344444	0.0268789	0.0236922	0.0119055	0.05604	0.0191167	0.0117111	0.0936444	0.0561176	0.0469931	0.067275	0.00724103	0.0765761	0.103778	0.0500326	0.111822	0.0795765	0.138118	0.0601314	0.0793781	0.0918891	0.0585614	0.0694233	0.344444	0.0291575	0.0297067
2002-06-25	0.0371	0.112827	0.0304162	0.137016	0.155492	0.105067	0.191393	0.181195	0.0786114	0.130391	0.0399804	0.0331556	0.133804	0.046542	0.131226	0.0260513	0.0351262	0.0699399	0.0493156	0.125002	0.112942	0.0357347	0.0600109	0.344444	0.0268789	0.0236922	0.0119055	0.05604	0.0191167	0.0117111	0.0936444	0.0561176	0.0469931	0.067275	0.00724103	0.0765761	0.103778	0.0488493	0.111822	0.0795765	0.138118	0.0601314	0.0793781	0.0918891	0.0585614	0.0694233	0.344444	0.0291575	0.0297067
2002-06-26	0.0371	0.112827	0.0253685	0.135416	0.155492	0.100867	0.191393	0.181195	0.0786114	0.130058	0.0399804	0.0331556	0.133004	0.046542	0.131226	0.0257436	0.0351262	0.0686732	0.0382489	0.125002	0.112942	0.0357347	0.0600109	0.344444	0.0268789	0.0236922	0.0119055	0.05604	0.0191167	0.0117111	0.0936444	0.0561176	0.0469931	0.067275	0.00693333	0.0765761	0.103778	0.0488493	0.111822	0.0795765	0.138118	0.0601314	0.0793781	0.0918891	0.0585614	0.0694233	0.344444	0.0291575	0.0297067
2002-06-27	0.0371	0.112827	0.0253685	0.135416	0.155492	0.100867	0.191393	0.181195	0.0786114	0.130058	0.0399804	0.0331556	0.132754	0.0452976	0.131226	0.0237897	0.0351262	0.0686732	0.0382489	0.125002	0.112942	0.0357347	0.0600109	0.344444	0.0268789	0.0236922	0.0119055	0.05604	0.0191167	0.0117111	0.0936444	0.0561176	0.0469931	0.067275	0.00693333	0.0765761	0.103778	0.0488493	0.111822	0.0795765	0.137437	0.0601314	0.0793781	0.0918891	0.0585614	0.0694233	0.344444	0.0291575	0.0297067
2002-06-28	0.0371	0.112827	0.0253685	0.13515	0.151225	0.0996667	0.19126	0.181195	0.0786114	0.130058	0.0399804	0.0331556	0.0847542	0.0452976	0.131226	0.0237897	0.0351262	0.0686732	0.0382489	0.125002	0.112942	0.0334694	0.0600109	0.344444	0.0268789	0.0236922	0.0119055	0.05604	0.0191167	0.0117111	0.0936444	0.0561176	0.0469931	0.067275	0.00693333	0.0765761	0.103778	0.0488493	0.111822	0.0795765	0.137437	0.0601314	0.0793781	0.0918891	0.0585614	0.0694233	0.344444	0.0291575	0.0297067
2002-06-29	0.0371	0.112827	0.0246435	0.131603	0.151225	0.100333	0.19126	0.172631	0.0786114	0.130058	0.0399804	0.0331556	0.0847542	0.0430754	0.131226	0.0177231	0.0303929	0.0686732	0.0382489	0.125002	0.112942	0.0334694	0.0600109	0.344444	0.0268789	0.0236922	0.0119055	0.05604	0.0191167	0.0117111	0.0936444	0.0561176	0.0469931	0.067275	0.00601026	0.0765761	0.103778	0.0488493	0.111822	0.0739384	0.137437	0.0601314	0.0769781	0.0918891	0.0585614	0.0694233	0.344444	0.0291575	0.0297067
2002-06-30	0.0363727	0.112827	0.0246435	0.131603	0.151225	0.0959333	0.19126	0.172631	0.0786114	0.130058	0.0399804	0.0331556	0.0847542	0.0392278	0.131226	0.0177231	0.0303929	0.0686732	0.0278489	0.125002	0.112942	0.0334694	0.0600109	0.344444	0.0268789	0.00929222	0.0119055	0.05604	0.0191167	0.0117111	0.0936444	0.0561176	0.0469931	0.067275	0.00601026	0.0759094	0.103778	0.048412	0.111822	0.0735765	0.137437	0.0601314	0.0769781	0.0918891	0.0585614	0.0694233	0.344444	0.0291575	0.0297067
2002-07-01	0.0363727	0.112827	0.0246435	0.131603	0.148292	0.0959333	0.19126	0.159609	0.0733099	0.130058	0.0399804	0.0331556	0.0847542	0.0392278	0.131226	0.0177231	0.0303929	0.0686732	0.0278489	0.125002	0.112942	0.0334694	0.0587109	0.344444	0.0268789	0.00929222	0.0119055	0.05604	0.0191167	0.0117111	0.0936444	0.0561176	0.0469931	0.046775	0.00601026	0.0759094	0.103778	0.048412	0.111822	0.0735765	0.137437	0.0601314	0.0769781	0.0918891	0.0585614	0.0655779	0.344444	0.0291575	0.0297067
2002-07-02	0.0363727	0.112827	0.0246435	0.131603	0.148292	0.0959333	0.19126	0.159609	0.0733099	0.130058	0.0399804	0.0331556	0.0847542	0.0392278	0.131226	0.0177231	0.0303929	0.0686732	0.0278489	0.125002	0.112942	0.0334694	0.0587109	0.29	0.0268789	0.00929222	0.0114605	0.05604	0.0191167	0.0117111	0.0936444	0.0561176	0.0469931	0.042175	0.00601026	0.0759094	0.103778	0.048412	0.111822	0.0735765	0.0927553	0.0601314	0.0769781	0.0918891	0.0585614	0.0655779	0.344444	0.0291575	0.0297067
2002-07-03	0.0363727	0.112827	0.0246435	0.131603	0.148292	0.0959333	0.19126	0.159609	0.0733099	0.130058	0.0399804	0.0331556	0.0847542	0.0386992	0.131226	0.0177231	0.0303929	0.0686732	0.0278489	0.125002	0.112942	0.0334694	0.0587109	0.29	0.0268789	0.00929222	0.0114605	0.05604	0.00602778	0.0117111	0.0936444	0.0561176	0.0469931	0.042175	0.00601026	0.0759094	0.103778	0.048412	0.110588	0.0735765	0.0782886	0.0601314	0.0769781	0.0918891	0.0585614	0.0655779	0.344444	0.0291575	0.0297067
2002-07-04	0.0363727	0.112827	0.0246435	0.131603	0.147807	0.0959333	0.19126	0.159609	0.0733099	0.130058	0.0399804	0.0331556	0.0847542	0.0386992	0.131226	0.0113231	0.0303929	0.0686732	0.0198489	0.125002	0.112942	0.0334694	0.0587109	0.29	0.0268789	0.00929222	0.0114605	0.05604	0.00602778	0.0117111	0.0936444	0.0561176	0.0469931	0.041075	0.00601026	0.0759094	0.103778	0.048412	0.110588	0.0735765	0.0782886	0.0601314	0.0769781	0.0918891	0.0585614	0.0591236	0.344444	0.0291575	0.0297067
2002-07-05	0.0363727	0.112827	0.0246435	0.131603	0.147807	0.0959333	0.19126	0.159609	0.0733099	0.130058	0.0399804	0.0331556	0.0847542	0.0386992	0.131226	0.0113231	0.0303929	0.0686732	0.0198489	0.125002	0.112942	0.0334694	0.0587109	0.29	0.0268789	0.00929222	0.0114605	0.0297067	0.00602778	0.0117111	0.0936444	0.0561176	0.0469931	0.039475	0.00601026	0.0382206	0.103778	0.048412	0.110588	0.0735765	0.0782886	0.0601314	0.0769781	0.0918891	0.0585614	0.0591236	0.344444	0.0291575	0.0297067
2002-07-06	0.0363727	0.112827	0.0246435	0.127163	0.147807	0.0959333	0.19126	0.159609	0.0733099	0.130058	0.0399804	0.0331556	0.0847542	0.0386992	0.131226	0.0113231	0.0303929	0.0686732	0.0198489	0.110723	0.112942	0.0334694	0.0587109	0.29	0.0268789	0.00929222	0.0114605	0.0297067	0.00602778	0.0117111	0.0916444	0.0561176	0.0469931	0.039475	0.00601026	0.0382206	0.103778	0.048412	0.110588	0.0735765	0.0774886	0.0601314	0.0749781	0.0918891	0.0585614	0.0591236	0.344444	0.0291575	0.0297067
2002-07-07	0.0363727	0.112827	0.0246435	0.127163	0.147499	0.0806	0.19126	0.159609	0.0733099	0.129258	0.0399804	0.0331556	0.0847542	0.0386992	0.131226	0.0113231	0.0303929	0.0686732	0.0198489	0.110723	0.112942	0.0334694	0.0558181	0.29	0.0268789	0.00929222	0.0114605	0.0297067	0.00602778	0.0117111	0.0916444	0.0561176	0.0469931	0.039475	0.00601026	0.0382206	0.103778	0.048412	0.1096	0.0735765	0.0774886	0.0601314	0.0749781	0.0918891	0.0585614	0.0591236	0.344444	0.0291575	0.0297067
2002-07-08	0.0363727	0.112827	0.0246435	0.127163	0.147499	0.0806	0.19126	0.159609	0.0733099	0.129258	0.0399804	0.0331556	0.0847542	0.0386992	0.131226	0.0113231	0.0303929	0.0686732	0.0198489	0.110723	0.112942	0.0334694	0.0558181	0.29	0.0268789	0.00929222	0.0114605	0.0297067	0.00602778	0.0117111	0.0916444	0.0561176	0.0469931	0.039475	0.00601026	0.0382206	0.103778	0.048412	0.1096	0.0735765	0.0774886	0.0394314	0.0749781	0.0918891	0.0585614	0.0591236	0.344444	0.0291575	0.0297067
2002-07-09	0.0363727	0.112827	0.0246435	0.127163	0.147499	0.0711333	0.19126	0.159209	0.0733099	0.129258	0.0399804	0.0331556	0.0677542	0.0386992	0.131226	0.0113231	0.0303929	0.0489399	0.0198489	0.110723	0.112942	0.0334694	0.0558181	0.29	0.0268789	0.00929222	0.0114605	0.0297067	0.00602778	0.0117111	0.0916444	0.0561176	0.0469931	0.039475	0.00581026	0.0382206	0.103778	0.048412	0.1096	0.0735765	0.0774886	0.0394314	0.0749781	0.0918891	0.0585614	0.0591236	0.344444	0.0291575	0.0297067
2002-07-10	0.0363727	0.112827	0.0246435	0.127163	0.147499	0.0711333	0.19126	0.159209	0.0733099	0.129258	0.0399804	0.0331556	0.0677542	0.0386992	0.131226	0.0107077	0.0303929	0.0489399	0.0198489	0.110723	0.112142	0.0334694	0.0558181	0.29	0.0268789	0.00929222	0.0114605	0.0297067	0.00602778	0.0117111	0.0916444	0.0561176	0.0469931	0.039475	0.00581026	0.0382206	0.103778	0.0413787	0.1096	0.0735765	0.0774886	0.0394314	0.0749781	0.0918891	0.0585614	0.0591236	0.344444	0.0291575	0.0297067
2002-07-11	0.0338727	0.112827	0.0246435	0.127163	0.147499	0.0711333	0.19126	0.159209	0.0733099	0.129258	0.0399804	0.0331556	0.0677542	0.0386992	0.131226	0.0107077	0.0303929	0.0489399	0.0198489	0.110723	0.112142	0.0334694	0.0558181	0.29	0.0268789	0.00929222	0.0114605	0.0297067	0.00602778	0.0117111	0.0916444	0.0561176	0.0469931	0.039475	0.00581026	0.0382206	0.103778	0.0413787	0.1096	0.0735765	0.0774886	0.0394314	0.0749781	0.0918891	0.0585614	0.0591236	0.344444	0.0291575	0.0297067
2002-07-12	0.0338727	0.112027	0.0246435	0.127163	0.147499	0.0711333	0.19126	0.159209	0.0733099	0.0961023	0.0399804	0.0331556	0.0677542	0.0386992	0.131226	0.0107077	0.0303929	0.0489399	0.0198489	0.110723	0.112142	0.0334694	0.0558181	0.29	0.0268789	0.00689222	0.0114605	0.0297067	0.00572778	0.0117111	0.0916444	0.0561176	0.0469931	0.039475	0.00581026	0.0382206	0.103778	0.0413787	0.1096	0.0735765	0.0774886	0.0394314	0.0749781	0.0918891	0.0585614	0.0591236	0.344444	0.0291575	0.0297067
2002-07-13	0.0338727	0.112027	0.0246435	0.108041	0.147246	0.0703333	0.172093	0.159209	0.0733099	0.0961023	0.0399804	0.0331556	0.0677542	0.0386992	0.131226	0.0107077	0.0303929	0.0489399	0.0198489	0.110723	0.0754625	0.0334694	0.0558181	0.29	0.0268789	0.00689222	0.0114605	0.0297067	0.00572778	0.0117111	0.0916444	0.0561176	0.0469931	0.039475	0.00581026	0.0382206	0.103778	0.0413787	0.1096	0.0735765	0.0774886	0.0394314	0.0749781	0.0918891	0.0585614	0.0591236	0.344444	0.0291575	0.0297067
2002-07-14	0.0338727	0.112027	0.0242935	0.100761	0.147246	0.0703333	0.172093	0.159209	0.0733099	0.0961023	0.0399804	0.0331556	0.0677542	0.0386992	0.131226	0.0107077	0.0303929	0.0489399	0.0198489	0.110723	0.0754625	0.0334694	0.0558181	0.29	0.0268789	0.00689222	0.0114605	0.0297067	0.00572778	0.0117111	0.0916444	0.0561176	0.0469931	0.039475	0.00581026	0.0382206	0.103778	0.0413787	0.1096	0.0735765	0.0774886	0.0394314	0.0749781	0.0918891	0.0585614	0.0591236	0.344444	0.0291575	0.0297067
2002-07-15	0.0338727	0.112027	0.0242935	0.0930812	0.147246	0.0703333	0.171093	0.159209	0.0733099	0.0961023	0.0399804	0.0331556	0.0677542	0.0386992	0.131226	0.0105077	0.0303929	0.0489399	0.0198489	0.110723	0.0754625	0.0334694	0.0558181	0.29	0.0268789	0.00689222	0.0114605	0.0297067	0.00572778	0.0117111	0.0916444	0.0561176	0.0469931	0.039475	0.00581026	0.0382206	0.103778	0.0413787	0.1096	0.0735765	0.0774886	0.0394314	0.0749781	0.0906224	0.0585614	0.0591236	0.344444	0.0291575	0.0297067
2002-07-16	0.0338727	0.112027	0.0242935	0.0930812	0.147121	0.0605333	0.171093	0.159209	0.0733099	0.0909468	0.0389804	0.0331556	0.0677542	0.0386992	0.131226	0.0105077	0.0303929	0.0489399	0.0195556	0.110723	0.0754625	0.0334694	0.0558181	0.29	0.0268789	0.00689222	0.0114605	0.0297067	0.00572778	0.0117111	0.0916444	0.0561176	0.0469931	0.039475	0.00581026	0.0382206	0.103778	0.0413787	0.1096	0.0735765	0.0774886	0.0394314	0.0749781	0.0906224	0.0585614	0.0571181	0.344444	0.0291575	0.0297067
2002-07-17	0.0338727	0.111427	0.0242935	0.0930812	0.142854	0.0605333	0.161454	0.159209	0.0733099	0.0889314	0.0389804	0.0331556	0.0677542	0.0386992	0.131226	0.0105077	0.0303929	0.0489399	0.0195556	0.110723	0.0754625	0.0334694	0.0558181	0.29	0.0268789	0.00689222	0.0114605	0.0297067	0.00572778	0.0117111	0.0916444	0.0561176	0.0469931	0.039475	0.00521026	0.0382206	0.103778	0.0413787	0.1096	0.0735765	0.0774886	0.0394314	0.0749781	0.0906224	0.0585614	0.0571181	0.344444	0.0291575	0.0297067
2002-07-18	0.0338727	0.111427	0.0242935	0.0930812	0.142854	0.0605333	0.161454	0.159209	0.0733099	0.0744647	0.0389804	0.0331556	0.0677542	0.0386992	0.129226	0.0105077	0.0303929	0.0489399	0.0195556	0.108823	0.0754625	0.0334694	0.0558181	0.29	0.0268789	0.00689222	0.0114605	0.0297067	0.00572778	0.0117111	0.0916444	0.0561176	0.0469931	0.034475	0.00521026	0.0382206	0.103778	0.0413787	0.1096	0.0735765	0.0774886	0.0394314	0.0749781	0.0906224	0.0585614	0.0571181	0.344444	0.0291575	0.0297067
2002-07-19	0.0338727	0.111427	0.0242935	0.081725	0.133387	0.0605333	0.159338	0.159209	0.0733099	0.0730425	0.0389804	0.0331556	0.0677542	0.0386992	0.129226	0.0105077	0.0303929	0.0489399	0.0195556	0.108823	0.0754625	0.0334694	0.0558181	0.29	0.0268789	0.00689222	0.0114605	0.0297067	0.00572778	0.0117111	0.0916444	0.0561176	0.0469931	0.034475	0.00521026	0.0382206	0.103778	0.0413787	0.108733	0.0735765	0.029422	0.0394314	0.0749781	0.0906224	0.0585614	0.0571181	0.344444	0.0291575	0.0297067
2002-07-20	0.0338727	0.111427	0.0242935	0.081725	0.133387	0.0605333	0.159338	0.159209	0.0733099	0.0730425	0.0389804	0.0331556	0.0677542	0.0386992	0.129226	0.0105077	0.0303929	0.0489399	0.0195556	0.108823	0.0754625	0.0334694	0.0558181	0.29	0.0268789	0.00689222	0.0114605	0.0297067	0.00572778	0.0117111	0.0916444	0.061254	0.0469931	0.034475	0.00521026	0.0382206	0.0925778	0.0413787	0.108733	0.0735765	0.029422	0.0394314	0.0749781	0.0906224	0.0585614	0.0571181	0.344444	0.0291575	0.0297067
2002-07-21	0.0338727	0.111427	0.0242935	0.081725	0.133387	0.0605333	0.159338	0.159209	0.0733099	0.0730425	0.0389804	0.0331556	0.0677542	0.0374928	0.129226	0.0105077	0.0303929	0.0489399	0.0186667	0.108823	0.0754625	0.0334694	0.0543781	0.29	0.0268789	0.00670333	0.0085005	0.0297067	0.00572778	0.0117111	0.0916444	0.0415661	0.0469931	0.034475	0.00521026	0.0382206	0.0925778	0.0396454	0.0897997	0.0735765	0.029422	0.0394314	0.0749781	0.0906224	0.0585614	0.0571181	0.344444	0.0291575	0.0297067
2002-07-22	0.0338727	0.111427	0.0242935	0.081725	0.133387	0.0605333	0.159338	0.159209	0.0733099	0.0303758	0.0389804	0.0331556	0.0677542	0.0374928	0.129226	0.0105077	0.0303929	0.0489399	0.0186667	0.108823	0.0754625	0.0334694	0.0543781	0.29	0.0268789	0.00670333	0.0085005	0.0297067	0.00572778	0.0117111	0.0916444	0.0415661	0.0469931	0.034475	0.00521026	0.0246087	0.0925778	0.0396454	0.0897997	0.0735765	0.029422	0.0394314	0.0749781	0.0906224	0.0585614	0.0571181	0.344444	0.0291575	0.0297067
2002-07-23	0.0338727	0.111427	0.0242935	0.081725	0.133387	0.0605333	0.159338	0.159209	0.0733099	0.0303758	0.0389804	0.0331556	0.0677542	0.0374928	0.129226	0.00890769	0.0303929	0.0489399	0.0186667	0.108823	0.0754625	0.0334694	0.0543781	0.29	0.0268789	0.00670333	0.0085005	0.0297067	0.00572778	0.0117111	0.0818667	0.0415661	0.0469931	0.034475	0.00521026	0.0246087	0.0925778	0.0396454	0.0897997	0.0735765	0.0242664	0.0394314	0.0749781	0.0906224	0.0585614	0.0571181	0.29	0.0291575	0.0297067
2002-07-24	0.0338727	0.111427	0.0242935	0.080925	0.132703	0.0605333	0.159338	0.130883	0.0733099	0.0303758	0.0389804	0.0331556	0.0677542	0.0157714	0.129226	0.00890769	0.00157961	0.0489399	0.0186667	0.108823	0.0754625	0.0298427	0.0543781	0.29	0.0268789	0.00670333	0.0085005	0.0297067	0.00572778	0.0117111	0.0818667	0.0415661	0.0469931	0.034475	0.00521026	0.0246087	0.0925778	0.0396454	0.0897997	0.0735765	0.0228442	0.0394314	0.0749781	0.0906224	0.0585614	0.0571181	0.29	0.0291575	0.0297067
2002-07-25	0.0338727	0.111427	0.0242935	0.080925	0.132051	0.0605333	0.159338	0.130883	0.0733099	0.0251543	0.0389804	0.0331556	0.0677542	0.0157714	0.129226	0.00890769	0.00157961	0.0463346	0.0186667	0.108823	0.0754625	0.0298427	0.0543781	0.29	0.0268789	0.00670333	0.0057005	0.0297067	0.00572778	0.0117111	0.0818667	0.0415661	0.0469931	0.034475	0.00521026	0.0246087	0.0925778	0.0396454	0.0897997	0.0735765	0.0228442	0.0394314	0.0749781	0.0906224	0.0585614	0.0571181	0.29	0.0291575	0.0297067
2002-07-26	0.0338727	0.111427	0.0202042	0.080925	0.132051	0.0561333	0.159338	0.129083	0.0733099	0.0251543	0.0389804	0.0331556	0.0677542	0.0157714	0.129226	0.00890769	0.00157961	0.0463346	0.00386667	0.108123	0.0754625	0.0298427	0.0543781	0.29	0.0268789	0.00670333	0.0057005	0.0297067	0.00572778	0.0117111	0.0818667	0.0415661	0.0469931	0.034475	0.00521026	0.0158087	0.0925778	0.0396454	0.0897997	0.0735765	0.0228442	0.0356314	0.0749781	0.0906224	0.0585614	0.0571181	0.29	0.0291575	0.0297067
2002-07-27	0.0338727	0.111427	0.0202042	0.080925	0.128451	0.0561333	0.157388	0.126483	0.0733099	0.0251543	0.0389804	0.0331556	0.0677542	0.0157714	0.129226	0.00890769	0.00157961	0.0463346	0.00386667	0.106669	0.0754625	0.0298427	0.0543781	0.29	0.0268789	0.00670333	0.0057005	0.0297067	0.00456111	0.0117111	0.0818667	0.0415661	0.0469931	0.018075	0.00521026	0.0158087	0.0925778	0.0396454	0.0868757	0.0735765	0.0228442	0.0356314	0.0749781	0.0906224	0.0585614	0.0571181	0.29	0.0291575	0.0297067
2002-07-28	0.0338727	0.111427	0.0202042	0.0558584	0.128451	0.0524	0.157388	0.126483	0.0733099	0.0251543	0.0389804	0.0331556	0.0677542	0.0136825	0.129226	0.00832051	0.00157961	0.0463346	0.00386667	0.106669	0.0754625	0.0298427	0.0446181	0.250667	0.0268789	0.00670333	0.0057005	0.0297067	0.00456111	0.0117111	0.0786667	0.0365661	0.0469931	0.018075	0.00470769	0.0158087	0.0925778	0.0396454	0.0868757	0.0735765	0.0228442	0.0356314	0.0749781	0.0906224	0.0585614	0.0571181	0.29	0.0291575	0.0297067
2002-07-29	0.0338727	0.111427	0.0202042	0.0517831	0.115251	0.0524	0.157388	0.126483	0.0733099	0.0251543	0.0389804	0.0331556	0.0677542	0.0136825	0.112026	0.00832051	0.00157961	0.0463346	0.00386667	0.106669	0.0754625	0.0298427	0.0446181	0.250667	0.0268789	0.00670333	0.0057005	0.0297067	0.00456111	0.0117111	0.0786667	0.0365661	0.0469931	0.018075	0.00470769	0.0158087	0.0925778	0.0396454	0.0868757	0.0735765	0.0228442	0.0356314	0.0749781	0.0906224	0.0555214	0.0571181	0.29	0.0291575	0.0297067
2002-07-30	0.0348727	0.111427	0.0202042	0.0517831	0.115251	0.0524	0.157388	0.126483	0.0733099	0.0251543	0.0389804	0.0331556	0.0677542	0.0136825	0.112026	0.00832051	0.00157961	0.0463346	0.00386667	0.0911778	0.0754625	0.0298427	0.0446181	0.250667	0.0268789	0.00670333	0.00539747	0.0297067	0.00456111	0.0117111	0.0786667	0.0365661	0.0469931	0.018075	0.00470769	0.0158087	0.0925778	0.0396454	0.0829557	0.0735765	0.0228442	0.0356314	0.0749781	0.0906224	0.0555214	0.0571181	0.29	0.0291575	0.0297067
2002-07-31	0.0348727	0.111427	0.0202042	0.0517831	0.115251	0.0524	0.154988	0.126483	0.0733099	0.0246825	0.0389804	0.0331556	0.0677542	0.0136825	0.111744	0.00832051	0.00157961	0.0463346	0.00386667	0.0436505	0.0754625	0.0298427	0.0446181	0.250667	0.0268789	0.00670333	0.00513697	0.0297067	0.00456111	0.0117111	0.0616667	0.0365661	0.0469931	0.018075	0.00470769	0.0158087	0.0925778	0.0396454	0.0820757	0.0720527	0.0228442	0.0356314	0.0749781	0.0906224	0.0555214	0.0571181	0.29	0.0291575	0.0297067
2002-08-01	0.0348727	0.11076	0.0198792	0.049348	0.115251	0.0524	0.154103	0.124172	0.0733099	0.0246825	0.0389804	0.0331556	0.0677542	0.0104825	0.111744	0.00832051	0.00157961	0.0463346	0.00386667	0.0418505	0.0754625	0.0298427	0.0446181	0.250667	0.0268789	0.00670333	0.00513697	0.0297067	0.00456111	0.0117111	0.0616667	0.0365661	0.0469931	0.018075	0.00470769	0.0158087	0.0896444	0.0396454	0.0820757	0.0717861	0.0228442	0.0356314	0.0749781	0.0906224	0.0555214	0.0571181	0.29	0.0291575	0.0297067
2002-08-02	0.0348727	0.10956	0.0198792	0.049348	0.111785	0.0524	0.153903	0.124172	0.0733099	0.0243748	0.0389804	0.0331556	0.0677542	0.00976825	0.111363	0.00832051	0.00157961	0.0463346	0.00386667	0.0298364	0.0754625	0.0298427	0.0446181	0.250667	0.0268789	0.00652	0.00513697	0.0297067	0.00456111	0.0117111	0.0616667	0.0365661	0.0469931	0.018075	0.00470769	0.0158087	0.0896444	0.0396454	0.0779957	0.0717861	0.0228442	0.0356314	0.0749781	0.0906224	0.0555214	0.0571181	0.29	0.0291575	0.0297067
2002-08-03	0.0348727	0.10956	0.0198792	0.041648	0.0223179	0.0496	0.153631	0.124172	0.0733099	0.0243748	0.0389804	0.0331556	0.0677542	0.00976825	0.111363	0.00832051	0.00157961	0.0463346	0.00386667	0.0298364	0.0754625	0.0293627	0.0446181	0.250667	0.0268789	0.00652	0.00513697	0.0297067	0.00456111	0.0117111	0.0616667	0.0365661	0.0469931	0.013975	0.00470769	0.0158087	0.0896444	0.0396454	0.0655361	0.0717861	0.0228442	0.0356314	0.0749781	0.0718542	0.0555214	0.0545818	0.29	0.0291575	0.0297067
2002-08-04	0.0345091	0.10956	0.0192626	0.040441	0.0223179	0.0342667	0.153631	0.124172	0.0733099	0.0243748	0.0389804	0.0331556	0.0677542	0.00976825	0.111363	0.00832051	0.00157961	0.0463346	0.00386667	0.0298364	0.0754625	0.0293627	0.0446181	0.250667	0.0265789	0.00652	0.00513697	0.0297067	0.00456111	0.0117111	0.0616667	0.0365661	0.0469931	0.013975	0.00470769	0.0158087	0.0896444	0.0396454	0.0655361	0.0717861	0.0228442	0.0356314	0.0749781	0.0718542	0.0381094	0.0545818	0.29	0.0291575	0.0297067
2002-08-05	0.0345091	0.10836	0.0192626	0.0379877	0.0218462	0.0342667	0.153631	0.0685718	0.0733099	0.0240209	0.0389804	0.0331556	0.0677542	0.00712698	0.111363	0.00832051	0.000335165	0.0463346	0.00386667	0.0298364	0.0297128	0.0288372	0.0446181	0.250667	0.0265789	0.00652	0.00513697	0.0297067	0.00456111	0.0117111	0.0616667	0.0365661	0.0469931	0.013475	0.00470769	0.0158087	0.0896444	0.0396454	0.0655361	0.0717861	0.0225365	0.0352885	0.0749781	0.0718542	0.0381094	0.0545818	0.29	0.0291575	0.0297067
2002-08-06	0.0345091	0.10836	0.0192626	0.0379877	0.0129128	0.0342667	0.153631	0.0685718	0.0733099	0.0240209	0.0389804	0.0331556	0.0677542	0.00401587	0.108963	0.00796667	0.000335165	0.0463346	0.00346667	0.00465455	0.0281128	0.0288372	0.0446181	0.250667	0.0265789	0.00652	0.00317455	0.0297067	0.00456111	0.0117111	0.0616667	0.0365661	0.0469931	0.013475	0.00470769	0.0158087	0.0896444	0.0396454	0.065125	0.0717861	0.0225365	0.0352885	0.0749781	0.0718542	0.0334694	0.0532818	0.29	0.0291575	0.0297067
2002-08-07	0.0345091	0.10836	0.0192626	0.029148	0.0129128	0.0342667	0.153631	0.0677718	0.0733099	0.0240209	0.0389804	0.0331556	0.0677542	0.00401587	0.0746967	0.00453333	0.000335165	0.0463346	0.00346667	0.0036	0.0281128	0.0288372	0.0446181	0.250667	0.0265789	0.00652	0.00317455	0.0297067	0.00456111	0.0117111	0.0616667	0.0365661	0.0405392	0.01215	0.00470769	0.014702	0.0878778	0.0396454	0.065125	0.0717861	0.0174688	0.0352885	0.0749781	0.0718542	0.0334694	0.0532818	0.29	0.0291575	0.0297067
2002-08-08	0.0345091	0.10836	0.0192626	0.029148	0.0129128	0.0342667	0.153631	0.0677718	0.0733099	0.0240209	0.0389804	0.0331556	0.0677542	0.00401587	0.0746967	0.00453333	0.000335165	0.0275664	0.00346667	0.0036	0.0281128	0.0288372	0.0440848	0.250667	0.0265789	0.00652	0.00317455	0.0016	0.00456111	0.0117111	0.0616667	0.0365661	0.038928	0.01215	0.00470769	0.00187704	0.0878778	0.0396454	0.065125	0.0717861	0.0174688	0.0352885	0.0749781	0.0718542	0.0334694	0.0518418	0.29	0.0291575	0.0297067
2002-08-09	0.0345091	0.10836	0.0192626	0.029148	0.0129128	0.0342667	0.153631	0.0677718	0.0733099	0.0240209	0.0387804	0.0331556	0.0675042	0.00401587	0.0746967	0.00453333	0.000335165	0.0275664	0.00253333	0.0036	0.0281128	0.0288372	0.0440848	0.250667	0.0265789	0.00652	0.00317455	0.0016	0.00456111	0.0117111	0.0616667	0.0365661	0.0243185	0.01215	0.00470769	0.00187704	0.0878778	0.0396454	0.065125	0.0717861	0.0174688	0.0352885	0.0749781	0.0718542	0.0334694	0.0518418	0.29	0.0291575	0.0297067
2002-08-10	0.0345091	0.10836	0.0186454	0.029148	0.0129128	0.0342667	0.153498	0.0677718	0.0733099	0.0240209	0.0387804	0.0331556	0.0664167	0.00401587	0.0746967	0.00453333	0.000335165	0.0275664	0.00253333	0.0036	0.0281128	0.0288372	0.0440848	0.250667	0.0265789	0.00652	0.00317455	0.0016	0.00456111	0.0117111	0.0616667	0.0365661	0.0243185	0.01215	0.00470769	0.00187704	0.0653444	0.0396454	0.065125	0.0714224	0.0174688	0.0352885	0.0749781	0.0718542	0.0334694	0.0518418	0.29	0.0291575	0.0297067
2002-08-11	0.0345091	0.10836	0.0186454	0.0273564	0.00962051	0.0342667	0.153498	0.0677718	0.0733099	0.0240209	0.0386065	0.0331556	0.0664167	0.00401587	0.0746967	0.00453333	0	0.0275664	0.00253333	0.0036	0.0281128	0.0288372	0.0440848	0.250667	0.0265789	0.00652	0.00317455	0.0016	0.00456111	0.0117111	0.0616667	0.0365661	0.0243185	0.01215	0.00530769	0.00187704	0.0653444	0.0396454	0.065125	0.0714224	0.0174688	0.0352885	0.0749781	0.0718542	0.0334694	0.0518418	0.29	0.0291575	0.0297067
2002-08-12	0.0345091	0.10836	0.0186454	0.0273564	0.00962051	0.0334667	0.153498	0.0677718	0.0733099	0.0240209	0.0386065	0.0331556	0.0664167	0.00401587	0.0746967	0.00453333	0	0.0275664	0.00253333	0.0036	0.0281128	0.0288372	0.0440848	0.250667	0.0265789	0.00652	0.00317455	0.0016	0.00456111	0.0117111	0.0616667	0.0365661	0.0243185	0.01215	0.00530769	0.00187704	0.0653444	0.0396454	0.065125	0.0714224	0.0174688	0.0352885	0.0749781	0.0521209	0.0334694	0.0518418	0.29	0.0291575	0.0297067
2002-08-13	0.0315091	0.10324	0.0184454	0.0267564	0.00962051	0.0334667	0.154198	0.0677718	0.0733099	0.0240209	0.0386065	0.0331556	0.0664167	0.00401587	0.0746967	0.00453333	0	0.0275664	0.00253333	0.0036	0.0330017	0.0208292	0.0415485	0.250667	0.0265789	0.00652	0.00317455	0.0016	0.00456111	0.0117111	0.0616667	0.0365661	0.0243185	0.01215	0.00530769	0.00187704	0.0653444	0.0396454	0.065125	0.0714224	0.0174688	0.0352885	0.0749781	0.0251169	0.0334694	0.0518418	0.29	0.0291575	0.0297067
2002-08-14	0.0315091	0.10324	0.0184454	0.0262675	0.00962051	0.0330667	0.154198	0.0548311	0.0733099	0.0240209	0.0386065	0.0331556	0.0664167	0.00401587	0.0746967	0.00453333	0	0.0275664	0.00253333	0.0036	0.0330017	0.0208292	0.0415485	0.250667	0.0265789	0.00652	0.00317455	0.0016	0.00456111	0.0117111	0.0616667	0.0309328	0.0243185	0.01215	0.00530769	0.00187704	0.0653444	0.0396454	0.065125	0.0714224	0.0174688	0.0352885	0.0749781	0.0251169	0.0334694	0.0518418	0.29	0.0291575	0.0297067
2002-08-15	0.0301091	0.10084	0.0136359	0.0249675	0.00962051	0.0330667	0.154198	0.0548311	0.0717861	0.0236209	0.0386065	0.0331556	0.06515	0.00401587	0.0505633	0.00213333	0	0.0275664	0.00253333	0.0036	0.0330017	0.0208292	0.0415485	0.250667	0.0265789	0.00652	0.00317455	0.0016	0.00456111	0.0117111	0.0616667	0.0257864	0.0243185	0.01215	0.00530769	0.00187704	0.0653444	0.0396454	0.065125	0.0714224	0.0174688	0.0352885	0.0749781	0.0251169	0.0298427	0.0518418	0.29	0.0291575	0.0297067
2002-08-16	0.0301091	0.10084	0.0136359	0.0249675	0.00962051	0.0330667	0.154198	0.0548311	0.0717861	0.0236209	0.0382123	0.0331556	0.06515	0.00401587	0.00403001	0.00213333	0	0.0275664	0.00253333	0.0036	0.0330017	0.0004025	0.0415485	0.250667	0.0265789	0.00652	0.00222909	0.0016	0.00456111	0.0117111	0.0612667	0.0252364	0.0243185	0.01215	0.00530769	0.00187704	0.0653444	0.0396454	0.0647846	0.0714224	0.0174688	0.0352885	0.0749781	0.0251169	0.0298427	0.0518418	0.29	0.0291575	0.0297067
2002-08-17	0.0301091	0.10084	0.00770258	0.0249675	0.00915897	0.0330667	0.154198	0.0548311	0.0717861	0.0236209	0.0382123	0.0331556	0.06515	0.00401587	0.00403001	0.00213333	0	0.0275664	0.00253333	0.0036	0.0330017	0.0004025	0.0415485	0.250667	0.0265789	0.00652	0.00222909	0.0016	0.00456111	0.0117111	0.0612667	0.0252364	0.0243185	0.01215	0.00530769	0.0229067	0.0653444	0.0396454	0.0647846	0.0714224	0.0174688	0.0352885	0.0749781	0.0251169	0.0218347	0.0518418	0.29	0.0291575	0.0297067
2002-08-18	0.0301091	0.10084	0.00770258	0.0249675	0.00915897	0.0330667	0.154198	0.0548311	0.0717861	0.0236209	0.0370123	0.0331556	0.06515	0.00401587	0.00403001	0.00213333	0	0.0275664	0.00253333	0.0036	0.0330017	0.0004025	0.0415485	0.250667	0.0265789	0.00652	0.00222909	0.0016	0.00456111	0.0113111	0.0612667	0.0252364	0.0243185	0.01215	0.00530769	0.0229067	0.0653444	0.0396454	0.0603446	0.0714224	0.0174688	0.0352885	0.0749781	0.000562406	0.0218347	0.0518418	0.29	0.0291575	0.0297067
2002-08-19	0.0301091	0.10084	0.00770258	0.0210475	0.00915897	0.0330667	0.154198	0.0548311	0.0715861	0.0203235	0.0370123	0.0331556	0.06515	0.00401587	0.00403001	0.00213333	0	0.0275664	0.00253333	0.0036	0.0330017	0.0004025	0.0415485	0.250667	0.0265789	0.00652	0.00222909	0.0016	0.00456111	0.0113111	0.0612667	0.0117864	0.0243185	0.01215	0.00370769	0.0229067	0.0653444	0.0396454	0.0603446	0.0714224	0.0174688	0.0352885	0.0749781	0.000562406	0.0218347	0.0420818	0.250667	0.0291575	0.0297067
2002-08-20	0.0301091	0.10084	0.00770258	0.0210475	0.00915897	0.0330667	0.154198	0.0548311	0.0715861	0.0203235	0.0370123	0.0331556	0.06515	0.00401587	0.00403001	0.00213333	0	0.0275664	0.00253333	0.0036	0.0330017	0.0004025	0.0415485	0.0951111	0.0265789	0.00652	0.00222909	0.0016	0.00456111	0.0113111	0.0612667	0.0117864	0.024	0.01215	0.00155385	0.0229067	0.0653444	0.0396454	0.0603446	0.0714224	0.0174688	0.0352885	0.0746967	0.000562406	0.0218347	0.0420818	0.250667	0.0291575	0.0297067
2002-08-21	0.0301091	0.09964	0.00770258	0.0199846	0.00915897	0.0330667	0.152801	0.0520311	0.0715861	0.0203235	0.0370123	0.0331556	0.06505	0.00157143	0.00403001	0.00213333	0	0.000562406	0.00253333	0.0036	0.0330017	0.0004025	0.0415485	0.0951111	0.0265789	0.00652	0.00222909	0.0016	0.00456111	0.0113111	0.0612667	0.0117864	0.024	0.01215	0.00155385	0.0229067	0.0653444	0.0192515	0.0603446	0.0714224	0.016997	0.0352885	0.0746967	0.000562406	0.0218347	0.0420818	0.250667	0.0291575	0.0297067
2002-08-22	0.0283818	0.09964	0.00770258	0.0199846	0.00915897	0.0330667	0.156979	0.0520311	0.0715861	0.0203235	0.0370123	0.0328889	0.0646	0.00157143	0.00403001	0.00213333	0	0.000562406	0.00133333	0.0036	0.0330017	0.0004025	0.0415485	0.0951111	0.0265789	0.00652	0.00222909	0.0016	0.00456111	0.0113111	0.0612667	0.0117864	0.0224	0.01215	0.00155385	0.0229067	0.0653444	0.0192515	0.0603446	0.0714224	0.016997	0.0342218	0.0746967	0.000562406	0.0218347	0.0420818	0.250667	0.0291575	0.0297067
2002-08-23	0.0283818	0.09964	0.00770258	0.0199846	0.00915897	0.0330667	0.155113	0.0491311	0.0715861	0.0203235	0.0370123	0.0328889	0.0646	0.00157143	0.00403001	0.00213333	0	0.000562406	0.00133333	0.0036	0.0330017	0.0004025	0.0255943	0.0951111	0.0265789	0.00652	0.00222909	0.0016	0.0197611	0.0113111	0.0605333	0.0117864	0.0221714	0.00515	0.00155385	0.0229067	0.0653444	0.0192515	0.0603446	0.0714224	0.016997	0.0332218	0.0746967	0.000562406	0.0218347	0.0420818	0.250667	0.0291575	0.0297067
2002-08-24	0.0283818	0.09964	0.00747758	0.019318	0.00915897	0.0330667	0.155113	0.0491311	0.0715861	0.0203235	0.0370123	0.0328889	0.0646	0.00157143	0.00403001	0.00213333	0	0.000562406	0.00133333	0.0036	0.0330017	0.0004025	0.0255943	0.0951111	0.0265789	0.00652	0.00222909	0.0016	0.0197611	0.0113111	0.0605333	0.0117864	0.0221714	0.00515	0.00155385	0.021403	0.0653444	0.0192515	0.0573579	0.0714224	0.016997	0.0332218	0.0746967	0.000562406	0.0218347	0.0261276	0.250667	0.0291575	0.0297067
2002-08-25	0.0335818	0.09964	0.00698472	0.0188127	0.00915897	0.0330667	0.151358	0.0491311	0.0715861	0.0203235	0.0370123	0.0328889	0.0646	0.00157143	0.00403001	0.00213333	0	0.000562406	0.00133333	0.0036	0.0330017	0.0004025	0	0	0.0265789	0.00652	0.00222909	0.0016	0.0197611	0.0113111	0.0605333	0.0117864	0.0192063	0.00515	0.00155385	0.021403	0.0653444	0.0192515	0.0322913	0.0714224	0.016797	0.0332218	0.0746967	0.000562406	0.0218347	0.0261276	0.250667	0.0291575	0.0297067
2002-08-26	0.0335818	0.09964	0.00613651	0.0188127	0.00915897	0.0330667	0.151358	0.0491311	0.0715861	0.0207235	0.0370123	0.0244889	0.0594	0.00157143	0.00403001	0.00213333	0	0.000562406	0.00133333	0.0036	0.0330017	0.0004025	0	0	0.0265789	0.00652	0.00177788	0.0016	0.0180944	0.0113111	0.0605333	0.0117864	0.0192063	0.00515	0.00155385	0.021403	0.0564111	0.0192515	0.0322913	0.0714224	0.016797	0.0332218	0.0746967	0.000562406	0.0218347	0.0261276	0.0951111	0.0291575	0.0297067
2002-08-27	0.0335818	0.09924	0.00613651	0.0124127	0.00915897	0.0330667	0.151358	0.0491311	0.0715861	0.0207235	0.0370123	0.0244889	0.0594	0.00157143	0.00403001	0.00213333	0	0.000562406	0.000333333	0.0036	0.0330017	0.0004025	0	0	0.0252718	0.00652	0.00177788	0.0016	0.0180944	0.0113111	0.0605333	0.0117864	0.0192063	0.00515	0.00155385	0.021403	0.0564111	0.0192515	0.0316395	0.0712224	0.016797	0.0332218	0.0746967	0.000562406	0.00140806	0.0261276	0.0951111	0.0291575	0.0297067
2002-08-28	0.0335818	0.09924	0.00613651	0.0124127	0.00915897	0.0330667	0.147697	0.0491311	0.0715861	0.0207235	0.0370123	0.0244889	0.0594	0.00157143	0.00403001	0.0014	0	0.000562406	0.000333333	0.0036	0.0330017	0.0004025	0	0	0.0252718	0.00652	0.00177788	0.0016	0.0180944	0.0113111	0.0605333	0.0117864	0.0192063	0.00515	0.0006	0.021403	0.0564111	0.0192515	0.0239595	0.0712224	0.0159816	0.0332218	0.0713633	0.000562406	0.00140806	0.0261276	0.0951111	0.0291575	0.0297067
2002-08-29	0.0335818	0.09924	0.00300317	0.0118794	0.00915897	0.0330667	0.147697	0.0491311	0.0715861	0.0204158	0.0368218	0.0244889	0.0594	0.00157143	0.00403001	0.0014	0	0.000562406	0.000333333	0.0036	0.0330017	0.0004025	0	0	0.0252718	0.00652	0.00177788	0.0016	0.0180944	0.0113111	0.0605333	0.0117864	0.0192063	0.00515	0.0006	0.021403	0.0564111	0.0192515	0.0239595	0.0712224	0.0159816	0.0332218	0.0713633	0.000562406	0.00140806	0.0261276	0.0951111	0.0291575	0.0297067
2002-08-30	0.0335818	0.09924	0.00300317	0.0118794	0.00915897	0.0330667	0.147697	0.0491311	0.0731099	0.0204158	0.0368218	0.0244889	0.0594	0.00157143	0.00403001	0.0014	0	0.000562406	0.000333333	0.0036	0.0330017	0.0004025	0	0	0.0251956	0.00652	0.00177788	0.0016	0.0180944	0.0113111	0.0605333	0.0174197	0.0192063	0.00515	0.0006	0.021403	0.0564111	0.0192515	0.0239595	0.0712224	0.0159816	0.0332218	0.0713633	0.000562406	0.000928056	0.0261276	0.0951111	0.0291575	0.0016
2002-08-31	0.0232636	0.09924	0.00300317	0.0118794	0.00915897	0.0330667	0.147697	0.0491311	0.0731099	0.0204158	0.00572184	0.0244889	0.0594	0.00157143	0.00403001	0.0014	0	0.000562406	0.000333333	0.0004	0.0330017	0.0004025	0	0	0.0251956	0.00652	0.00177788	0.0016	0.0192611	0.00811111	0.0605333	0.0174197	0.0192063	0.00515	0.0006	0.021403	0.0564111	0.000251515	0.0234543	0.0712224	0.0159816	0.0332218	0.0713633	0.000562406	0.000928056	0.0261276	0.0951111	0.0291575	0.0016
2002-09-01	0.0210636	0.09924	0.00300317	0.0118794	0.00915897	0.0330667	0.14743	0.0491311	0.0731099	0.0204158	0.00572184	0.0244889	0.0594	0.00157143	0.00403001	0.0006	0	0.000562406	0.000333333	0.0004	0.0330017	0.0004025	0	0	0.0251956	0.00652	0.00177788	0.0016	0.0192611	0.00811111	0.0570667	0.0174197	0.0192063	0.00515	0.0006	0.021403	0.0564111	0.000251515	0.0234543	0.0712224	0.0159816	0.0332218	0.0713633	0.000562406	0.000928056	0.0261276	0.0951111	0.0291575	0.0016
2002-09-02	0.0210636	0.09924	0.00300317	0.0118794	0.00915897	0.0330667	0.1454	0.0491311	0.0731099	0.0204158	0.00572184	0.0244889	0.0594	0.00157143	0.00403001	0.0006	0	0.000562406	0.000333333	0.00495758	0.0330017	0.0050425	0	0	0.0251956	0.00543026	0.00177788	0.0016	0.0192611	0.00811111	0.0570667	0.0174197	0.0192063	0.00515	0.0006	0.021403	0.0551111	0.000251515	0.0234543	0.0712224	0.0159816	0.0332218	0.0713633	0.000562406	0.000928056	0.0255943	0.0951111	0.0291575	0.0016
2002-09-03	0.0210636	0.09924	0.00300317	0.0118794	0.00390769	0.0330667	0.1454	0.0491311	0.0731099	0.0204158	0.00572184	0.0244889	0.0594	0.00157143	0.00403001	0.0006	0	0.000562406	0.000333333	0.00495758	0.0330017	0.0050425	0	0	0.0251956	0.00543026	0.00177788	0.0016	0.0192611	0.00811111	0.0570667	0.0174197	0.0192063	0.00515	0.0006	0.021403	0.0551111	0.000251515	0.0234543	0.0712224	0.0159816	0.0330218	0.0713633	0.000562406	0.000928056	0	0.0951111	0.0278504	0.0016
2002-09-04	0.0210636	0.09924	0.00300317	0.0118794	0.00390769	0.0330667	0.144985	0.0491311	0.0731099	0.0204158	0.00572184	0.0244889	0.0594	0.00157143	0.00403001	0.0006	0	0.000562406	0.000333333	0.00495758	0.0330017	0.0050425	0	0	0.0251956	0.00543026	0.00177788	0.0016	0.0192611	0.00811111	0.0570667	0.0174197	0.0192063	0.00515	0.0006	0.021403	0.0551111	0.000251515	0.0234543	0.0712224	0.0159816	0.0330218	0.0713633	0.000562406	0.00402917	0	0.0951111	0.0278504	0.0016
2002-09-05	0.0210636	0.09924	0.00284127	0.00835936	0.00390769	0.0330667	0.144985	0.0491311	0.0731099	0.0204158	0.00572184	0.0244889	0.0594	0.001	0.00403001	0.0006	0	0.000562406	0.000333333	0.00495758	0.0330017	0.0050425	0	0	0.0251956	0.00543026	0.00177788	0.0016	0.0320611	0.00811111	0.0570667	0.0149697	0.0192063	0.00515	0.0006	0.021403	0.0551111	0.000251515	0.0234543	0.0712224	0.0126842	0.0330218	0.0713633	0.000562406	0.00402917	0	0.0951111	0.0278504	0.0016
2002-09-06	0.0210636	0.09452	0.00284127	0.00835936	0.0036	0.0330667	0.144985	0.0491311	0.0731099	0.0204158	0.00572184	0.0244889	0.0594	0.001	0.00403001	0.0006	0	0.000562406	0.000333333	0.00495758	0.0330017	0.0050425	0	0	0.0251956	0.00543026	0.00177788	0.0016	0.0320611	0.00811111	0.0570667	0.0169697	0.0104635	0.00515	0.0006	0.021403	0.0551111	0.000251515	0.0234543	0.0712224	0.0106842	0.0330218	0.0713633	0.000562406	0.00402917	0	0.0951111	0.0278504	0.0016
2002-09-07	0.0210636	0.09452	0.00284127	0.00835936	0.0036	0.0330667	0.14685	0.0491311	0.0731099	0.0204158	0.00572184	0.0244889	0.058075	0.001	0.00403001	0.0006	0	0.000562406	0.000333333	0.00495758	0.0330017	0.0050425	0	0	0.0251956	0.00543026	0.00177788	0.0016	0.0320611	0.00811111	0.0570667	0.0169697	0.0104635	0.00515	0.0006	0.021403	0.0551111	0.000251515	0.0234543	0.0712224	0.0106842	0.0330218	0.0713633	0.000562406	0.00402917	0	0.0951111	0.0278504	0.0016
2002-09-08	0.0210636	0.09452	0.00284127	0.00835936	0.0036	0.0330667	0.14685	0.0491311	0.0731081	0.0204158	0.00572184	0.0244889	0.058075	0.001	0.000696681	0.0006	0	0.000562406	0.000333333	0.00495758	0.0330017	0.00866917	0	0	0.00609561	0.00543026	0.00177788	0.0016	0.0320611	0.00811111	0.0570667	0.0169697	0.0104635	0.00515	0.0006	0.021403	0.0551111	0.000251515	0.0234543	0.0712224	0.0106842	0.0330218	0.04723	0.000562406	0.00402917	0	0.0951111	0.0278504	0.0016
2002-09-09	0.0210636	0.09452	0.00284127	0.00742673	0.0036	0.0330667	0.14685	0.0491311	0.0731081	0.0204158	0.00572184	0.0241333	0.0593417	0.001	0.000696681	0.003	0	0.000562406	0.000333333	0.00495758	0.0330017	0.00866917	0	0	0.00609561	0.00543026	0.00177788	0.0016	0.0320611	0.00811111	0.0570667	0.0169697	0.0104635	0.00515	0.0006	0.021403	0.0551111	0.000251515	0.0230016	0.0712224	0.0106842	0.0330218	0.000696681	0.000562406	0.00402917	0	0.0951111	0.0278504	0.0016
2002-09-10	0.0210636	0.09452	0.00284127	0.00742673	0.0036	0.0330667	0.155383	0.0491311	0.0731081	0.0204158	0.00572184	0.0241333	0.0593417	0.001	0.000696681	0.003	0	0.000562406	0.000333333	0.00495758	0.0330017	0.00866917	0	0	0.00609561	0.00543026	0.00177788	0.0016	0.0319611	0.00811111	0.0570667	0.0169697	0.0104635	0.00515	0.0006	0.021403	0.0551111	0.000251515	0.0230016	0.0712224	0.0102842	0.0330218	0.000696681	0.000562406	0.00402917	0	0.0951111	0.0278504	0.0016
2002-09-11	0.0210636	0.09452	0.00284127	0.00807848	0.0036	0.0330667	0.157499	0.0475039	0.0731081	0.0204158	0.00572184	0.0241333	0.0593417	0.001	0.000696681	0.003	0	0.000562406	0.000333333	0.00495758	0.0330017	0.00866917	0	0	0.00609561	0.00543026	0.00177788	0.0016	0.0319611	0.00811111	0.0570667	0.0169697	0.0104635	0.00515	0.0006	0.021403	0.0551111	0.000251515	0.0230016	0.0712224	0.0102842	0.0330218	0.000696681	0.000562406	0.00402917	0	0.0951111	0.0278504	0.0016
2002-09-12	0.0210636	0.09412	0.00284127	0.00894515	0.0036	0.0330667	0.154665	0.0450039	0.0731081	0.0204158	0.00572184	0.0241333	0.0243417	0	0.000696681	0.003	0	0.000562406	0.000333333	0.00495758	0.084835	0.00866917	0	0	0.00609561	0.00543026	0.0192979	0.0016	0.0319611	0.00811111	0.00124444	0.0169697	0.00265397	0.00515	0.0006	0.021403	0.0551111	0.000251515	0.0230016	0.0712224	0.0102842	0.0330218	0.000696681	0.000562406	0.00402917	0	0.0951111	0.0278504	0.0016
2002-09-13	0.0210636	0.09412	0.00284127	0.0208013	0.0036	0.0330667	0.154665	0.0450039	0.0731081	0.0204158	0.00572184	0.0241333	0.0243417	0	0.000696681	0.00358718	0	0.000562406	0.000333333	0.00495758	0.105119	0.00866917	0	0	0.00609561	0.00543026	0.0523112	0.0016	0.0319611	0.00811111	0.0119556	0.0169697	0.00265397	0.00515	0.00110256	0.021403	0.0551111	0.000251515	0.0224016	0.0712224	0.0102842	0.0330218	0.000696681	0.000562406	0.00866917	0	0.0951111	0.00875037	0.0016
2002-09-14	0.0214273	0.09412	0	0.0208013	0.0036	0.0330667	0.154665	0.0450039	0.0731081	0.0204158	0.00572184	0.0241333	0.0243417	0	0.000696681	0.00358718	0	0.000562406	0.000333333	0.00495758	0.105119	0.00866917	0	0	0.00609561	0.00543026	0.0523112	0.0016	0.0317611	0.00811111	0.0123556	0.0169697	0.00265397	0.00515	0.00110256	0.0223141	0.0551111	0.000251515	0.0224016	0.0712224	0.0101303	0.0330218	0.000696681	0.000562406	0.00866917	0	0.0951111	0.00845037	0.0016
2002-09-15	0.0214273	0.09412	0	0.022593	0.0036	0.0330667	0.154665	0.0450039	0.0731081	0.0204158	0.00572184	0.0241333	0.0243417	0	0.000696681	0.00918718	0	0.000562406	0.000333333	0.00495758	0.105119	0.00866917	0	0	0.00609561	0.00543026	0.0523112	0.0016	0.0317611	0.00811111	0.0123556	0.0169697	0.00265397	0.00515	0.00110256	0.0223141	0.0551111	0.000251515	0.0224016	0.0712224	0.0101303	0.0330218	0.000696681	0.000562406	0.0238158	0	0.0951111	0.00845037	0.0016
2002-09-16	0.0214273	0.09412	0	0.022593	0.0036	0.0330667	0.154665	0.0288817	0.0731081	0.0204158	0.00572184	0.0241333	0.0219917	0	0.000696681	0.00918718	0	0.000562406	0.000333333	0.00495758	0.105119	0.00866917	0	0	0.00609561	0.00543026	0.0630312	0.0016	0.0317611	0.00811111	0.0123556	0.0169697	0.00265397	0.00515	0.00110256	0.0223141	0.0551111	0.000251515	0.0232683	0.0712224	0.0101303	0.0330218	0.000696681	0.000562406	0.0238158	0	0.0951111	0.00845037	0.0016
2002-09-17	0.0474273	0.09412	0	0.022593	0.00413333	0.0348	0.156838	0.0288817	0.0731081	0.0184158	0.00572184	0.0241333	0.0219917	0	0.000696681	0.00918718	0	0.000562406	0.00833333	0.00495758	0.105119	0.0238158	0	0	0.00609561	0.0432458	0.0630312	0.0016	0.0317611	0.00811111	0.0123556	0.0169697	0.00265397	0.00515	0.00110256	0.0223141	0.0580444	0.000251515	0.0232683	0.0712224	0.0101303	0.0330218	0.000696681	0.00032381	0.0238158	0	0.0951111	0.00837418	0.0016
2002-09-18	0.118527	0.09412	0	0.022113	0.00413333	0.0348	0.156838	0.0288817	0.0784097	0.0184158	0.00572184	0.0241333	0.0219917	0	0.000696681	0.00918718	0	0.000562406	0.00833333	0.00495758	0.111057	0.0238158	0	0	0.00609561	0.0432458	0.0712882	0.0016	0.0319611	0.00811111	0.0124889	0.0169697	0.00265397	0.00515	0.00110256	0.0359259	0.0580444	0.000251515	0.0244016	0.0712224	0.0101303	0.0330218	0.000696681	0.00032381	0.0238158	0	0.0951111	0.00837418	0.0016
2002-09-19	0.118527	0.09412	0	0.022113	0.00413333	0.0348	0.130438	0.0288817	0.0784097	0.0184158	0.00572184	0.0241333	0.0219917	0	0.000696681	0.00918718	0.000571429	0.000562406	0.00833333	0.00495758	0.111057	0.0238158	0	0	0.00609561	0.0432458	0.0712882	0.0016	0.0319611	0.00811111	0.0156889	0.0307485	0.00265397	0.00515	0.00110256	0.0365185	0.0580444	0.000251515	0.0244016	0.0712224	0.0101303	0.0330218	0.000696681	0.00032381	0.0238158	0	0.0951111	0.00837418	0.0016
2002-09-20	0.121527	0.09412	0	0.0245663	0.00413333	0.0348	0.130438	0.0288817	0.0784097	0.0184158	0.00572184	0.0241333	0.0219917	0	0.000696681	0.00918718	0.000571429	0.000562406	0.00873333	0.0128606	0.121337	0.0238158	0	0	0.00609561	0.0432458	0.0732506	0.0016	0.0319611	0.00811111	0.0156889	0.0441985	0.00265397	0.00185	0.00110256	0.0365185	0.0565444	0.000251515	0.0257216	0.0712224	0.0101303	0.0330218	0.000696681	0.00032381	0.0238158	0	0	0.00837418	0.0016
2002-09-21	0.121527	0.09412	0	0.0245663	0.00413333	0.0348	0.130438	0.041908	0.0784097	0.0186158	0.00572184	0.0241333	0.0227917	0.00264127	0.000696681	0.00918718	0.00181587	0.00182907	0.00873333	0.0139152	0.121337	0.0268558	0	0	0.00609561	0.0878058	0.0763439	0	0.0319611	0.00811111	0.0156889	0.0441985	0.00265397	0.00185	0.00110256	0.0365185	0.0565444	0.000251515	0.0257216	0.0712224	0.0101303	0.0330218	0.000696681	0.00032381	0.0268558	0	0	0.00837418	0.0016
2002-09-22	0.121527	0.09412	0.000617143	0.0245663	0.00413333	0.0348	0.130438	0.041908	0.0784097	0.0099047	0.00572184	0.0241333	0.0227917	0.00264127	0.000696681	0.00918718	0.00181587	0.00182907	0.0439067	0.0139152	0.121337	0.0268558	0	0	0.00609561	0.0878058	0.0763439	0	0.0319611	0.00811111	0.0156889	0.0441985	0.0113968	0.00185	0.00110256	0.0365185	0.0565444	0.000251515	0.0263734	0.0712224	0.00924145	0.0330218	0.000696681	0.00032381	0.0268558	0	0	0.00837418	0.0016
2002-09-23	0.134927	0.09412	0.000617143	0.0245663	0.00413333	0.0501333	0.129638	0.0380858	0.0784097	0.0099047	0.00572184	0.0149333	0.0707917	0.00264127	0.000696681	0.00918718	0.00181587	0.00182907	0.0543067	0.0139152	0.121337	0.0268558	0	0	0.00609561	0.0878058	0.0925306	0	0.0319611	0.00811111	0.0156889	0.0441985	0.00967619	0.00185	0.00110256	0.0365185	0.0565444	0.000251515	0.0263734	0.0712224	0.00924145	0.0330218	0.000696681	0.00032381	0.0268558	0	0	0.00837418	0.0016
2002-09-24	0.134927	0.09332	0.000617143	0.0245663	0.00413333	0.0501333	0.129638	0.0380858	0.0784097	0.0099047	0.00572184	0.0149333	0.0707917	0.00264127	0.000696681	0.0123872	0.00181587	0.00182907	0.0543067	0.0281939	0.121337	0.0268558	0	0	0.0251956	0.0878058	0.0939706	0	0.0319611	0.00811111	0.0156889	0.0441985	0.00967619	0.00685	0.00270256	0.0371852	0.0565444	0.000251515	0.0263734	0.0712224	0.00924145	0.0330218	0.000696681	0.00032381	0.0268558	0	0	0.00837418	0.0016
2002-09-25	0.132327	0.09332	0.000617143	0.0245663	0.0176	0.0557333	0.129638	0.0380858	0.0784097	0.0099047	0.00572184	0.0149333	0.0703917	0.00494283	0.000696681	0.0123872	0.00256335	0.00182907	0.0543067	0.0281939	0.121337	0.0268558	0	0	0.0251956	0.0878058	0.0944218	0	0.0339278	0.00811111	0.0156889	0.0638864	0.0112762	0.00685	0.00270256	0.0371852	0.0677444	0.000688745	0.0263734	0.0712224	0.0166192	0.0330218	0.000696681	0.00032381	0.0268558	0	0	0.00845037	0
2002-09-26	0.132327	0.09332	0.000617143	0.0245663	0.0176	0.0557333	0.129638	0.0964728	0.0784097	0.0099047	0.00572184	0.0149333	0.0799917	0.00494283	0.000696681	0.0123872	0.00256335	0.00182907	0.0543067	0.0281939	0.122137	0.0268558	0	0	0.0251956	0.0902058	0.0944218	0	0.0339278	0.00811111	0.0156889	0.0638864	0.0112762	0.00685	0.00290256	0.0459852	0.0677444	0.000688745	0.0263734	0.0714224	0.0166192	0.0330218	0.00403001	0.00032381	0.0268558	0	0	0.00845037	0
2002-09-27	0.133055	0.093	0.000617143	0.0245663	0.0205333	0.0557333	0.129638	0.0964728	0.0784097	0.0099047	0.00572184	0.0149333	0.0799917	0.00814283	0.000696681	0.0126949	0.00256335	0.00182907	0.0543067	0.0417636	0.122137	0.0268558	0.0013	0	0.0251956	0.0902058	0.0944218	0	0.03225	0.00811111	0.0156889	0.0638864	0.0112762	0.00685	0.00370256	0.0459852	0.0677444	0.000688745	0.0263734	0.0714224	0.0166192	0.0330218	0.00403001	0.00032381	0.0268558	0	0	0.00845037	0
2002-09-28	0.133055	0.093	0.000950476	0.0245663	0.0376	0.121733	0.129638	0.0964728	0.0784097	0.0099047	0.00572184	0.0149333	0.0799917	0.0088095	0.000696681	0.0133103	0.00358557	0.00182907	0.0543067	0.0417636	0.122137	0.0268558	0.0013	0	0.0251956	0.104606	0.0947248	0	0.03225	0.00811111	0.0156889	0.0638864	0.0112762	0.00685	0.00370256	0.0459852	0.0677444	0.000688745	0.0268786	0.0714224	0.0166192	0.0330218	0.00403001	0.00032381	0.0268558	0	0	0.00845037	0
2002-09-29	0.133055	0.093	0.000950476	0.0257383	0.0446667	0.1356	0.129638	0.0987839	0.0784097	0.0100585	0.00572184	0.0141333	0.0799917	0.0088095	0.000696681	0.0133103	0.00358557	0.00182907	0.0543067	0.0424095	0.122137	0.0268558	0.0013	0	0.0212956	0.131246	0.0947248	0	0.0620833	0.00811111	0.0156889	0.0638864	0.0112762	0.00685	0.00370256	0.0459852	0.0902778	0.000688745	0.0268786	0.0714224	0.0166192	0.0330218	0.00403001	0.00032381	0.0268558	0	0	0.00845037	0
2002-09-30	0.143055	0.093	0.00179869	0.0332849	0.0453179	0.1412	0.134695	0.101284	0.0840478	0.0100585	0.00572184	0.0141333	0.0799917	0.0088095	0.000696681	0.0193769	0.00358557	0.00150526	0.0551956	0.0424095	0.168164	0.0268558	0.0013	0	0.0212956	0.131246	0.0971164	0	0.06555	0.00811111	0.0167556	0.0638864	0.0112762	0.00685	0.00370256	0.0459852	0.0902778	0.000688745	0.0268786	0.0714224	0.0166192	0.0330218	0.00403001	0.00032381	0.0268558	0	0	0.00845037	0
2002-10-01	0.143055	0.093	0.00179869	0.0332849	0.0453179	0.1412	0.141129	0.101284	0.0840478	0.0100585	0.00572184	0.0141333	0.0799917	0.00952379	0.000696681	0.0277513	0.00358557	0.00150526	0.0551956	0.0424095	0.168164	0.0268558	0.0013	0	0.0213718	0.131246	0.0971164	0	0.06555	0.00811111	0.0169556	0.0638864	0.0112762	0.00685	0.0597026	0.0459852	0.0902778	0.000688745	0.0353786	0.0714224	0.0166192	0.0330218	0.00403001	0.00032381	0.0268558	0	0	0.00845037	0
2002-10-02	0.143055	0.093	0.00588798	0.0332849	0.0453179	0.149867	0.141129	0.104084	0.0840478	0.0100585	0.00572184	0.0141333	0.0807917	0.0365905	0.000696681	0.0277513	0.00558557	0.00150526	0.0553556	0.0424095	0.176564	0.0269058	0.0013	0	0.0213718	0.131246	0.0982218	0	0.06555	0.00731111	0.0169556	0.0638864	0.0112762	0.00685	0.0606026	0.0459852	0.0902778	0.00105238	0.0353786	0.0714224	0.0166192	0.0330218	0.00403001	0.00032381	0.0268558	0	0	0.00845037	0
2002-10-03	0.143055	0.0934	0.00682964	0.0618579	0.0457795	0.149867	0.141129	0.104084	0.0840478	0.0100585	0.00572184	0.0141333	0.115792	0.042946	0.000696681	0.0307513	0.00898557	0.00150526	0.0553556	0.0424095	0.187675	0.0269058	0.0013	0	0.0213718	0.131246	0.0982218	0	0.06555	0.00731111	0.0169556	0.0630364	0.0112762	0.00685	0.0627564	0.0459852	0.09	0.00105238	0.0402586	0.0714224	0.0166192	0.0330218	0.00403001	0.00032381	0.0268558	0	0	0.00845037	0
2002-10-04	0.149209	0.0934	0.00682964	0.0700468	0.0457795	0.151067	0.143494	0.104084	0.0840478	0.0103662	0.00591232	0.0141333	0.115792	0.0468508	0.000696681	0.106351	0.00898557	0.00150526	0.0553556	0.0424095	0.21281	0.0269058	0.0013	0	0.0211289	0.131246	0.0982218	0	0.06555	0.00731111	0.0169556	0.0630364	0.0112762	0.00735	0.0711564	0.0459852	0.09	0.00105238	0.0455072	0.0714224	0.0196859	0.0330218	0.00403001	0.00032381	0.0268558	0	0	0.00845037	0
2002-10-05	0.149209	0.0934	0.00682964	0.0951135	0.0499308	0.151067	0.144214	0.104084	0.0844114	0.0103662	0.00591232	0.0141333	0.126242	0.049073	0.00403001	0.106351	0.0137189	0.00150526	0.0565556	0.0424095	0.21281	0.0265033	0.0013	0	0.0211289	0.131246	0.113848	0	0.06525	0.00731111	0.0169556	0.0630364	0.0112762	0.03245	0.0711564	0.0459852	0.09	0.00105238	0.0644405	0.0714224	0.0188679	0.0330218	0.00403001	0	0.0268558	0	0	0.00845037	0
2002-10-06	0.149209	0.0964667	0.0116392	0.0959135	0.0511923	0.152267	0.144214	0.105644	0.0844114	0.0103662	0.00591232	0.0141333	0.126242	0.0496016	0.00403001	0.107151	0.0137189	0.00150526	0.0565556	0.0424095	0.21281	0.0265033	0.0013	0	0.0211289	0.136766	0.114293	0	0.0655389	0.00731111	0.0169556	0.0630364	0.0112762	0.03245	0.0711564	0.0459852	0.0814667	0.00105238	0.0644405	0.0714224	0.0188679	0.0330218	0.00403001	0	0.0264533	0	0	0.00845037	0
2002-10-07	0.170609	0.0969467	0.0116392	0.0983486	0.0511923	0.152267	0.144414	0.105309	0.0844114	0.0106739	0.00591232	0.0141333	0.131692	0.050846	0.00403001	0.123126	0.0137189	0.00150526	0.0565556	0.0424095	0.21281	0.0265033	0.0013	0	0.0209939	0.136766	0.117093	0	0.0655389	0.00731111	0.0169556	0.0630364	0.0112762	0.03245	0.0801564	0.0459852	0.0814667	0.00105238	0.0668756	0.0714224	0.0188679	0.0330218	0.00403001	0	0.0264533	0	0	0.00820752	0
2002-10-08	0.170609	0.0969467	0.0116392	0.102789	0.0516769	0.152267	0.144414	0.105376	0.0844114	0.0106739	0.00591232	0.0141333	0.133017	0.0622682	0.00403001	0.124126	0.0137189	0.00150526	0.0565556	0.0424095	0.21281	0.0265033	0.0013	0	0.0209939	0.136766	0.120314	0	0.0655389	0.00731111	0.0169556	0.0630364	0.0112762	0.03245	0.0840641	0.0459852	0.0617333	0.00105238	0.0668756	0.0714224	0.0188679	0.0330218	0.00403001	0	0.0264533	0	0	0.00820752	0
2002-10-09	0.175409	0.0969467	0.0116392	0.10563	0.0516769	0.158467	0.147514	0.105376	0.0844114	0.0106739	0.00591232	0.0127556	0.133017	0.0849349	0.00403001	0.176526	0.0186522	0.00150526	0.0565556	0.0424095	0.21281	0.0265033	0.0013	0	0.0209939	0.136766	0.120314	0	0.0655389	0.00731111	0.0169556	0.0630364	0.0112762	0.03125	0.0842641	0.0459852	0.0617333	0.00105238	0.0668756	0.0714224	0.0188679	0.0330218	0.00403001	0	0.0264533	0	0	0.00820752	0
2002-10-10	0.175409	0.0969467	0.0118642	0.107082	0.0516769	0.158467	0.147514	0.105376	0.0844114	0.0108073	0.00591232	0.0127556	0.133017	0.0895524	0.00403001	0.177279	0.0186522	0.00150526	0.0565556	0.0430907	0.21361	0.0265033	0.0013	0	0.0209939	0.136966	0.120537	0	0.0656389	0.00731111	0.0169556	0.0630364	0.0112762	0.03125	0.0842641	0.0459852	0.0617333	0.00105238	0.0717267	0.0714224	0.0190013	0.0330218	0.00403001	0	0.0287187	0	0	0.00820752	0
2002-10-11	0.177136	0.0969467	0.0118642	0.107082	0.0516769	0.159267	0.147514	0.105376	0.0844114	0.0108073	0.00608623	0.0127556	0.133017	0.0967079	0.00403001	0.178679	0.0186522	0.00150526	0.0565556	0.0430907	0.219036	0.0265033	0.0013	0	0.0209939	0.136966	0.120537	0	0.0656389	0.00666667	0.0169556	0.0630364	0.0112762	0.03125	0.0842641	0.0459852	0.0617333	0.00105238	0.0727667	0.0714224	0.0190013	0.0330218	0.00403001	0	0.0287187	0	0	0.00820752	0
2002-10-12	0.177136	0.0969467	0.0118642	0.10727	0.0526942	0.159267	0.149914	0.105376	0.0844114	0.0108073	0.00608623	0.0135556	0.133017	0.0944063	0.00403001	0.182413	0.0179048	0.00150526	0.0565556	0.0470592	0.219036	0.0265033	0.0013	0	0.0209939	0.132097	0.120537	0	0.0656389	0.00666667	0.0169556	0.0630364	0.0112762	0.03125	0.0938641	0.0453185	0.0617333	0.000615152	0.0729553	0.0714224	0.0190013	0.0330218	0.00403001	0	0.0287187	0	0	0.00820752	0
2002-10-13	0.177136	0.0969467	0.0118642	0.107611	0.0526942	0.162067	0.152764	0.108076	0.0846781	0.0108073	0.00608623	0.0135556	0.133017	0.0944063	0.00403001	0.182413	0.0179048	0.00150526	0.0566889	0.0470592	0.219036	0.0287687	0.0013	0	0.0209939	0.132097	0.120537	0	0.0656389	0.00666667	0.0334889	0.0630364	0.0112762	0.03125	0.0938641	0.0453185	0.0617333	0.000615152	0.0983623	0.0714224	0.0187744	0.0330218	0.00403001	0	0.0287187	0	0	0.00820752	0
2002-10-14	0.181055	0.0969467	0.0120642	0.105408	0.0526942	0.162067	0.152764	0.108076	0.0846781	0.0108073	0.00608623	0.0135556	0.133017	0.23174	0.00403001	0.1913	0.100707	0.00126667	0.0576222	0.0485137	0.219036	0.0287687	0.0013	0	0.0209939	0.132097	0.120537	0	0.0656389	0.00666667	0.0334889	0.0630364	0.0112762	0.03805	0.0947872	0.0453185	0.0617333	0.000615152	0.0983623	0.0714224	0.0187744	0.0330218	0.00403001	0	0.0287187	0	0	0.0080725	0
2002-10-15	0.183255	0.0969467	0.0120642	0.105408	0.0530942	0.164667	0.153453	0.108076	0.0846781	0.0108073	0.00628623	0.0139111	0.134104	0.310806	0.00403001	0.1913	0.122395	0.00126667	0.0576222	0.0485137	0.219036	0.0287687	0.0013	0	0.0209939	0.132097	0.120537	0	0.0656389	0.00666667	0.0334889	0.0630364	0.0112762	0.03805	0.0963872	0.0453185	0.0617333	0.000615152	0.0983623	0.0714224	0.0187744	0.0332218	0.00403001	0	0.0287187	0	0	0.0080725	0
2002-10-16	0.183255	0.0969467	0.0120642	0.106008	0.053566	0.164667	0.17262	0.110876	0.0776081	0.0109611	0.00628623	0.0139111	0.135954	0.314006	0.00333333	0.192722	0.122984	0.00126667	0.0576222	0.120489	0.219036	0.0287687	0.0013	0	0.0209939	0.132097	0.120537	0	0.0656389	0.00666667	0.0334889	0.0630364	0.0112762	0.03805	0.0963872	0.0453185	0.0617333	0.000615152	0.0983623	0.0714224	0.0187744	0.0332218	0.00403001	0	0.0287187	0	0	0.0080725	0
2002-10-17	0.183255	0.0975467	0.0120642	0.106008	0.0537199	0.164667	0.172892	0.110876	0.0776081	0.0109611	0.0073529	0.0139111	0.135954	0.316965	0.00333333	0.192722	0.122984	0.00126667	0.0572889	0.120489	0.219036	0.0287687	0.0013	0	0.0211289	0.132097	0.120537	0	0.0656389	0.00666667	0.0334889	0.0630364	0.0112762	0.03805	0.0963872	0.0453185	0.0617333	0.000615152	0.0989623	0.0714224	0.0187744	0.0332218	0.00403001	0	0.0287187	0	0	0.00820752	0
2002-10-18	0.183618	0.0987467	0.012557	0.106542	0.0537199	0.164667	0.172892	0.112476	0.0776081	0.0109611	0.00769576	0.0141778	0.136454	0.317663	0.00333333	0.19303	0.123442	0.00126667	0.0572889	0.120489	0.219036	0.0287687	0.0013	0	0.0214289	0.132097	0.120537	0	0.0656389	0.00666667	0.0334889	0.0630364	0.0112762	0.03805	0.0963872	0.0453185	0.0617333	0.000615152	0.0994957	0.0773272	0.0189282	0.0346314	0.00643001	0	0.0287187	0	0	0.00820752	0
2002-10-19	0.185018	0.0987467	0.012557	0.106542	0.0537199	0.165467	0.172892	0.112476	0.0776081	0.0109611	0.00819576	0.0141778	0.136454	0.318416	0.00333333	0.19303	0.123442	0.00126667	0.0582889	0.120489	0.236393	0.0287687	0.00225273	0	0.0214289	0.132097	0.120537	0	0.0656389	0.00666667	0.0334889	0.0630364	0.0112762	0.03805	0.0963872	0.0453185	0.0617333	0.000615152	0.0994957	0.0773272	0.0189282	0.0346314	0.00309668	0	0.0287187	0	0	0.00820752	0
2002-10-20	0.185018	0.0987467	0.012557	0.106542	0.0554939	0.165867	0.17394	0.112476	0.0776081	0.0109611	0.00832909	0.0233778	0.138104	0.318638	0.00333333	0.199738	0.123442	0.00126667	0.0582889	0.120489	0.238793	0.0287687	0.00225273	0	0.0214289	0.132297	0.120069	0	0.0656389	0.00666667	0.0334889	0.0630364	0.0112762	0.03805	0.0971679	0.0365185	0.0617333	0.000615152	0.0994957	0.0771272	0.0189282	0.0347647	0.00309668	0	0.0287187	0	0	0.00820752	0
2002-10-21	0.185018	0.0989067	0.012557	0.106542	0.0554939	0.1824	0.17394	0.112476	0.0778081	0.0107342	0.00832909	0.0233778	0.138104	0.343083	0.00333333	0.199738	0.152255	0.00126667	0.126489	0.146632	0.275472	0.0372183	0.00225273	0	0.0214289	0.132297	0.120069	0	0.0656389	0.00666667	0.0334889	0.0630364	0.0112762	0.04215	0.0991679	0.0365185	0.0617333	0.0207575	0.0994957	0.0700571	0.0189282	0.0290429	0.00309668	0	0.0367267	0.0159542	0	0.00850752	0
2002-10-22	0.185018	0.0989067	0.012557	0.106542	0.0607452	0.1824	0.17854	0.112476	0.0778081	0.0107342	0.00832909	0.0233778	0.138104	0.343083	0.00333333	0.203171	0.152255	0.00126667	0.126489	0.147232	0.275472	0.0372183	0.00225273	0	0.0214289	0.132297	0.120069	0	0.0656389	0.00666667	0.0334889	0.0630364	0.0112762	0.04215	0.0991679	0.0365185	0.0617333	0.0207575	0.0994957	0.0700571	0.0189282	0.0290429	0.0024	0.0245545	0.0367267	0.0159542	0	0.00850752	0
2002-10-23	0.185018	0.0989067	0.012557	0.106542	0.0607452	0.1824	0.17854	0.112876	0.0778081	0.0107342	0.00832909	0.0233778	0.138104	0.344417	0.00333333	0.203171	0.152255	0.00126667	0.126489	0.147232	0.275472	0.0372183	0.00225273	0	0.0214289	0.132297	0.120069	0	0.0656389	0.00666667	0.0413556	0.0579	0.0112762	0.04215	0.0991679	0.0365185	0.0617333	0.0207575	0.0994957	0.0704208	0.0189282	0.0290429	0.0024	0.0245545	0.0367267	0.0159542	0	0.00850752	0
2002-10-24	0.187518	0.0989067	0.012557	0.106542	0.0607452	0.1824	0.17854	0.112876	0.0778081	0.0107342	0.00832909	0.0233778	0.138104	0.344417	0.00333333	0.203971	0.152255	0.00126667	0.126489	0.147932	0.275472	0.0372183	0.00225273	0	0.0214289	0.132297	0.120069	0	0.0656389	0.00666667	0.0413556	0.0579	0.0112762	0.04215	0.100455	0.0365185	0.0617333	0.0207575	0.0994957	0.0757224	0.0189282	0.0290429	0.0024	0.0245545	0.0367267	0.0159542	0	0.00850752	0
2002-10-25	0.187518	0.0989067	0.012557	0.106542	0.0607452	0.1824	0.17854	0.112876	0.0778081	0.0107342	0.00832909	0.0233778	0.138104	0.346337	0.00333333	0.203371	0.152255	0.00126667	0.126489	0.148176	0.280139	0.0372183	0.00225273	0	0.0214289	0.132297	0.120069	0	0.0656389	0.00666667	0.0413556	0.0579	0.0112762	0.04215	0.100455	0.0365185	0.0617333	0.0207575	0.0994957	0.0757224	0.0189282	0.0290429	0.0024	0.0245545	0.0367267	0.0159542	0	0.00850752	0
2002-10-26	0.187518	0.104027	0.012557	0.107022	0.0607452	0.1824	0.17854	0.113711	0.0778081	0.00960855	0.00260725	0.0233778	0.139704	0.346337	0.00333333	0.203371	0.152255	0.00126667	0.126489	0.148176	0.280139	0.0372183	0.00225273	0	0.0214289	0.132297	0.120069	0	0.0656389	0.00666667	0.0413556	0.0579	0.0112762	0.04215	0.100455	0.0365185	0.0617333	0.0207575	0.0994957	0.0757224	0.0189282	0.0290429	0.0024	0.0245545	0.0367267	0.0159542	0	0.00850752	0
2002-10-27	0.187518	0.104027	0.012557	0.107022	0.0607452	0.1824	0.17854	0.113711	0.0778081	0.012906	0.00260725	0.0233778	0.139704	0.346969	0.00333333	0.203371	0.152255	0.00126667	0.126489	0.150409	0.280139	0.038045	0.027847	0	0.0214289	0.132297	0.120069	0	0.0656389	0.00666667	0.0468222	0.0579	0.0112762	0.04215	0.100955	0.0365185	0.0617333	0.0207575	0.0994957	0.0762843	0.0189282	0.0290429	0.0024	0.0245545	0.0367267	0.0159542	0	0.00850752	0
2002-10-28	0.187518	0.104027	0.013557	0.107474	0.0607452	0.1824	0.17854	0.113711	0.0778081	0.012906	0.00260725	0.0233778	0.139704	0.346969	0.00333333	0.218238	0.152255	0.00126667	0.126489	0.150409	0.280139	0.0385706	0.027847	0	0.0214289	0.132297	0.120069	0	0.0656389	0.00666667	0.0472222	0.0630464	0.0103429	0.04235	0.119955	0.0365185	0.0617333	0.0207575	0.0999483	0.0762843	0.0189282	0.0290429	0.00573333	0.0245545	0.0375989	0.0159542	0	0.00850752	0
2002-10-29	0.187518	0.104027	0.013557	0.109676	0.0610528	0.1824	0.179282	0.113711	0.0778081	0.0131329	0.00260725	0.0233778	0.139704	0.346969	0.00333333	0.218238	0.152255	0.00126667	0.126489	0.150409	0.280139	0.0385706	0.0268943	0	0.0253289	0.132297	0.120069	0	0.0656389	0.00706667	0.0472222	0.0630464	0.0103429	0.04345	0.121288	0.0365185	0.0617333	0.0207575	0.0999483	0.0762843	0.0189282	0.0290429	0.00573333	0.0245545	0.0375989	0.0159542	0	0.00850752	0
2002-10-30	0.187518	0.104027	0.0163983	0.109676	0.0610528	0.1824	0.179282	0.113711	0.0778081	0.0131329	0.00260725	0.0247556	0.139704	0.346969	0.00333333	0.218238	0.152255	0.00126667	0.126489	0.154209	0.277948	0.0385706	0.0268943	0	0.0253289	0.132297	0.120515	0	0.0656389	0.00706667	0.0472222	0.0630464	0.0104317	0.04345	0.121288	0.0365185	0.0617333	0.0207575	0.0999483	0.0762843	0.0222256	0.0290429	0.00573333	0.0245545	0.0375989	0.0159542	0	0.00850752	0
2002-10-31	0.187518	0.104027	0.0163983	0.109676	0.0610528	0.1824	0.179282	0.14879	0.0778081	0.0207551	0.00260725	0.0247556	0.139704	0.348124	0.00351515	0.218768	0.152891	0.00126667	0.126489	0.154968	0.28017	0.0385706	0.0268943	0	0.0253289	0.132297	0.120515	0	0.0656389	0.00706667	0.0472222	0.0630464	0.0120429	0.04345	0.123488	0.0365185	0.0617333	0.0207575	0.0999483	0.0762843	0.0366923	0.00174286	0.00591515	0	0.0375989	0.0159542	0	0.00850752	0
2002-11-01	0.187518	0.104027	0.0214459	0.111276	0.0610528	0.1824	0.179282	0.15249	0.0778081	0.0207551	0.0337072	0.0247556	0.139704	0.348124	0.00351515	0.218768	0.152891	0.00126667	0.129689	0.154968	0.28017	0.0385706	0.0268943	0	0.0253289	0.132297	0.120515	0	0.0656389	0.00706667	0.0472222	0.0630464	0.0184968	0.044775	0.124442	0.0376252	0.0635	0.0207575	0.0999483	0.0762843	0.0369192	0.0294371	0.00591515	0	0.0375989	0.0159542	0	0.00850752	0
2002-11-02	0.187518	0.105227	0.0214459	0.117676	0.15052	0.217067	0.179282	0.15249	0.0778081	0.0258228	0.0337072	0.0247556	0.139704	0.369235	0.00351515	0.218768	0.171969	0.00126667	0.206089	0.173659	0.28017	0.0385706	0.0358849	0	0.0255718	0.132297	0.120778	0	0.0656389	0.00706667	0.0472222	0.0630464	0.0184968	0.061175	0.124442	0.0376252	0.0648	0.0207575	0.100828	0.0778081	0.0369192	0.0294371	0.00591515	0	0.0375989	0.0172542	0	0.00875037	0
2002-11-03	0.187518	0.105227	0.0214459	0.117676	0.15052	0.217067	0.180082	0.165431	0.0778081	0.0270946	0.0337072	0.0247556	0.139954	0.369235	0.00379654	0.218768	0.171969	0.00126667	0.206089	0.173659	0.282709	0.0385706	0.0518391	0	0.0255718	0.132486	0.120778	0	0.0656389	0.00706667	0.0472222	0.0630464	0.0184968	0.061175	0.124842	0.0376252	0.0648	0.0207575	0.100828	0.0778081	0.0419869	0.0332371	0.00591515	0	0.0375989	0.0172542	0	0.00875037	0
2002-11-04	0.187518	0.105627	0.0214459	0.117676	0.15292	0.217067	0.180082	0.166431	0.0778081	0.0435767	0.0341014	0.0247556	0.141529	0.369235	0.00379654	0.218768	0.171969	0.00159048	0.206089	0.176713	0.282709	0.0385706	0.0523724	0	0.0255718	0.132486	0.120778	0.0281067	0.0656389	0.00706667	0.0472222	0.0630464	0.0184968	0.061175	0.124842	0.0376252	0.0648	0.0261575	0.100828	0.0778081	0.0427869	0.0332371	0.00619654	0	0.0380789	0.0177875	0	0.00845037	0.0281067
2002-11-05	0.187518	0.105627	0.0214459	0.117676	0.15292	0.218667	0.180082	0.166631	0.0778081	0.0435767	0.0341014	0.0247556	0.141529	0.369235	0.00379654	0.218768	0.171969	0.00159048	0.206089	0.176713	0.282709	0.0385706	0.0523724	0.155556	0.0255718	0.137355	0.120778	0.0281067	0.0659389	0.00706667	0.0472222	0.0654964	0.0184968	0.06235	0.124842	0.0376252	0.0649	0.0261575	0.108508	0.0778081	0.0448023	0.0332371	0.00619654	0	0.0380789	0.0177875	0	0.00845037	0.0281067
2002-11-06	0.187518	0.105627	0.0226173	0.125356	0.15292	0.218667	0.181082	0.166966	0.0848781	0.0980656	0.0341014	0.0247556	0.143879	0.369235	0.00449322	0.219501	0.171969	0.00159048	0.206089	0.176713	0.282709	0.0387306	0.0552652	0.155556	0.0255718	0.137355	0.120778	0.0281067	0.0659389	0.00706667	0.0472222	0.0654964	0.0188153	0.06265	0.125796	0.0376252	0.0649	0.0323019	0.108508	0.0778081	0.0448023	0.0332371	0.00619654	0.00032381	0.0380789	0.0177875	0	0.00845037	0.0281067
2002-11-07	0.188161	0.107627	0.0285673	0.13051	0.153173	0.218667	0.181488	0.166966	0.0848781	0.0991912	0.0398233	0.0247556	0.143879	0.369235	0.00449322	0.219501	0.171969	0.00159048	0.206089	0.176713	0.282709	0.0387306	0.0552652	0.155556	0.0255718	0.137355	0.120778	0.0289067	0.0659389	0.00706667	0.0472222	0.0654964	0.0188153	0.06265	0.125796	0.0504502	0.0734333	0.0325786	0.109742	0.0848781	0.0452741	0.0389589	0.00689322	0.00032381	0.0382389	0.0177875	0	0.00875037	0.0297067
2002-11-08	0.188161	0.107627	0.0285673	0.13091	0.153173	0.219067	0.181688	0.166966	0.0848781	0.0991912	0.0398233	0.0247556	0.143879	0.370235	0.00449322	0.219501	0.171969	0.00159048	0.206089	0.176713	0.282709	0.0387306	0.0572706	0.155556	0.0255718	0.137355	0.120778	0.0289067	0.0659389	0.00851111	0.0472222	0.0663464	0.0365296	0.06265	0.125796	0.0504502	0.0737111	0.0325786	0.110142	0.0848781	0.0515553	0.0389589	0.00689322	0.00032381	0.0382389	0.0177875	0	0.00875037	0.0297067
2002-11-09	0.188161	0.107627	0.0285673	0.13091	0.153173	0.219067	0.181688	0.167766	0.0848781	0.0995245	0.0398233	0.0247556	0.143879	0.370235	0.00449322	0.219501	0.171969	0.00159048	0.206089	0.176713	0.282709	0.0387306	0.0587106	0.155556	0.0255718	0.137355	0.120778	0.0289067	0.0659389	0.0117111	0.0472222	0.0714828	0.0365296	0.06265	0.125796	0.0592502	0.0737111	0.0413453	0.110142	0.0848781	0.100889	0.0694589	0.00689322	0.00032381	0.0382389	0.0459181	0	0.00875037	0.0297067
2002-11-10	0.188161	0.107627	0.0285673	0.13091	0.154107	0.219067	0.181688	0.171988	0.0848781	0.101525	0.0618852	0.0247556	0.160879	0.370235	0.00715988	0.219501	0.171969	0.00182907	0.206089	0.176713	0.282709	0.0387306	0.0587106	0.155556	0.0255718	0.138444	0.120778	0.0289067	0.0659389	0.0117111	0.0472222	0.0714828	0.0365296	0.06265	0.125796	0.0592502	0.0737111	0.0413453	0.110142	0.0848781	0.100889	0.0931589	0.00689322	0.0202957	0.0382389	0.0523724	0.155556	0.00875037	0.0297067
2002-11-11	0.188161	0.107627	0.0285673	0.13139	0.167307	0.219067	0.181688	0.171988	0.0848781	0.101525	0.0716852	0.0247556	0.160879	0.370235	0.00715988	0.219501	0.171969	0.00182907	0.206089	0.176713	0.282709	0.0591572	0.0596633	0.155556	0.0255718	0.138444	0.120778	0.0289067	0.0676167	0.0117111	0.0472222	0.0714828	0.0382503	0.06265	0.125796	0.0592502	0.0743778	0.0417328	0.110142	0.0848781	0.100889	0.0945208	0.00955988	0.0202957	0.0382389	0.0596633	0.155556	0.0100575	0.0297067
2002-11-12	0.188161	0.107627	0.0285673	0.13139	0.167307	0.219067	0.181688	0.18131	0.0848781	0.149991	0.0953852	0.0247556	0.160979	0.370235	0.0508932	0.219501	0.171969	0.028833	0.206089	0.176713	0.282709	0.0591572	0.0596633	0.155556	0.0255718	0.138628	0.120778	0.0289067	0.0678167	0.0117111	0.0472222	0.0714828	0.0382503	0.06265	0.125796	0.0592502	0.0758778	0.0417328	0.110142	0.0848781	0.182111	0.0945208	0.0356932	0.0472997	0.0382389	0.0596633	0.155556	0.0100575	0.0297067
2002-11-13	0.188161	0.107627	0.0292923	0.13139	0.167307	0.219067	0.181688	0.217063	0.0848781	0.149991	0.0953852	0.0247556	0.160979	0.370235	0.0824932	0.219501	0.171969	0.028833	0.206089	0.179319	0.282709	0.0591572	0.0614724	0.155556	0.0255718	0.138628	0.120778	0.0289067	0.0678167	0.0117111	0.0472222	0.0714828	0.0382503	0.06265	0.125796	0.0592502	0.0848111	0.0442661	0.110142	0.0848781	0.185866	0.0945208	0.0356932	0.0472997	0.0382389	0.0596633	0.155556	0.00981466	0.0297067
2002-11-14	0.188161	0.107627	0.0292923	0.13139	0.167307	0.243067	0.181688	0.219263	0.0848781	0.151413	0.0953852	0.0331556	0.160979	0.370235	0.0844932	0.219501	0.171969	0.028833	0.206089	0.179319	0.282709	0.0591572	0.0614724	0.250667	0.0255718	0.138628	0.120778	0.0305067	0.0678167	0.0117111	0.0472222	0.0714828	0.0382503	0.06565	0.125796	0.0592502	0.0848111	0.0445176	0.110142	0.0848781	0.187289	0.0945208	0.131027	0.0472997	0.0382389	0.0596633	0.155556	0.0100575	0.0297067
2002-11-15	0.188161	0.112347	0.0292923	0.13139	0.167307	0.243067	0.181688	0.219263	0.0848781	0.152094	0.0953852	0.0331556	0.161379	0.370235	0.131027	0.219501	0.171969	0.028833	0.206089	0.179319	0.282709	0.0591572	0.0712324	0.29	0.0255718	0.138628	0.120778	0.0305067	0.0678167	0.0117111	0.0472222	0.0764828	0.0382503	0.06725	0.125796	0.0599169	0.0848111	0.0639549	0.110142	0.0848781	0.187289	0.0945208	0.131027	0.0472997	0.0382389	0.0596633	0.155556	0.0100575	0.0297067
2002-11-16	0.191361	0.112667	0.0314257	0.13139	0.167307	0.243067	0.203488	0.247589	0.0848781	0.152094	0.0953852	0.0331556	0.161379	0.372536	0.131027	0.219501	0.172716	0.028833	0.206089	0.179319	0.282709	0.0595597	0.0712324	0.29	0.0255718	0.138628	0.121261	0.0305067	0.0678167	0.0117111	0.0472222	0.0764828	0.0382503	0.06725	0.125796	0.0599169	0.0848111	0.0651382	0.114062	0.0848781	0.187969	0.0945208	0.131027	0.0472997	0.0590681	0.0596633	0.158222	0.0100575	0.0297067
2002-11-17	0.191361	0.112667	0.0314257	0.13491	0.167307	0.243067	0.203488	0.247589	0.0848781	0.18525	0.0953852	0.0331556	0.161379	0.372536	0.131027	0.219501	0.172716	0.028833	0.206089	0.179319	0.282709	0.0595597	0.0712324	0.344444	0.0255718	0.138628	0.121261	0.05684	0.0678167	0.0117111	0.0472222	0.0764828	0.0382503	0.06725	0.125796	0.0976057	0.0848111	0.0651382	0.114062	0.0848781	0.187969	0.0945208	0.131027	0.0472997	0.0590681	0.0596633	0.292667	0.0100575	0.0297067
2002-11-18	0.191361	0.112667	0.0314257	0.13491	0.167307	0.243067	0.203488	0.2584	0.0848781	0.188605	0.0953852	0.0331556	0.161379	0.372536	0.131027	0.219501	0.172716	0.028833	0.206089	0.179319	0.2849	0.0595597	0.0712324	0.347111	0.0255718	0.138628	0.121261	0.05684	0.0678167	0.0117111	0.0472222	0.0764828	0.0460598	0.06725	0.125796	0.0976057	0.0848111	0.0651382	0.114062	0.0848781	0.187969	0.0945208	0.131027	0.0485664	0.0590681	0.0694233	0.292667	0.0100575	0.0297067
2002-11-19	0.191361	0.112667	0.0315876	0.138456	0.167307	0.243067	0.203488	0.272275	0.0848781	0.188605	0.0953852	0.0331556	0.161379	0.372536	0.131027	0.219501	0.172716	0.028833	0.206089	0.179319	0.2849	0.0595597	0.0712324	0.347111	0.0255718	0.138628	0.121261	0.05684	0.0678167	0.0117111	0.103044	0.0764828	0.0460598	0.06725	0.125796	0.0976057	0.0848111	0.0651382	0.114062	0.0848781	0.187969	0.0945208	0.131027	0.0485664	0.0590681	0.0694233	0.347111	0.0100575	0.0297067
2002-11-20	0.191361	0.112667	0.0315876	0.138456	0.167307	0.243067	0.203488	0.272275	0.0848781	0.19051	0.0953852	0.0331556	0.161379	0.372536	0.131027	0.219501	0.172716	0.028833	0.206089	0.179319	0.2849	0.0595597	0.0712324	0.347111	0.0255718	0.138628	0.121261	0.05684	0.0678167	0.0117111	0.103044	0.0764828	0.0460598	0.06725	0.125796	0.0976057	0.0848111	0.0651382	0.114062	0.0848781	0.189058	0.0945208	0.131027	0.0485664	0.0590681	0.0694233	0.347111	0.0100575	0.0297067
2002-11-21	0.191361	0.113467	0.0315876	0.138456	0.167307	0.243067	0.203488	0.272275	0.0848781	0.19051	0.0953852	0.0331556	0.161379	0.372536	0.131027	0.219501	0.172716	0.028833	0.206089	0.179319	0.2849	0.0595597	0.0712324	0.347111	0.0255718	0.138628	0.122554	0.05684	0.0678167	0.0117111	0.103044	0.0764828	0.0460598	0.06725	0.125796	0.0976057	0.0848111	0.0651382	0.114942	0.0848781	0.191874	0.0945208	0.131027	0.0731209	0.0590681	0.0694233	0.363111	0.0100575	0.0297067
2002-11-22	0.192961	0.113467	0.0315876	0.138456	0.167307	0.243067	0.203488	0.272275	0.0848781	0.19051	0.0953852	0.0331556	0.161379	0.372536	0.131027	0.219501	0.172716	0.0533875	0.206089	0.179319	0.2849	0.0595597	0.0712324	0.363111	0.0255718	0.138628	0.122554	0.05684	0.0678167	0.0117111	0.103044	0.0764828	0.0460598	0.06725	0.132196	0.0976057	0.0848111	0.0651382	0.114942	0.0848781	0.191874	0.0945208	0.131027	0.0731209	0.0590681	0.0694233	0.363111	0.0291575	0.0297067
2002-11-23	0.192961	0.113467	0.0315876	0.139336	0.167307	0.243067	0.203488	0.272275	0.0848781	0.193576	0.0953852	0.0331556	0.161379	0.372536	0.131408	0.219501	0.172716	0.0533875	0.206089	0.179319	0.2849	0.0595597	0.0712324	0.363111	0.0255718	0.138628	0.122554	0.05684	0.0678167	0.0117111	0.103044	0.0764828	0.0460598	0.06725	0.132196	0.0976057	0.0848111	0.0651382	0.114942	0.0848781	0.191874	0.0945208	0.131408	0.0731209	0.0590681	0.0694233	0.363111	0.0291575	0.0297067
2002-11-24	0.192961	0.113467	0.0315876	0.139336	0.167307	0.243067	0.203488	0.272275	0.0848781	0.193576	0.0953852	0.0331556	0.161379	0.372536	0.131408	0.219501	0.172716	0.0533875	0.206089	0.179319	0.2849	0.0595597	0.0712324	0.363111	0.0255718	0.138628	0.122554	0.05684	0.0678167	0.0117111	0.103044	0.0764828	0.0460598	0.06725	0.132196	0.0976057	0.0848111	0.0651382	0.114942	0.0848781	0.192207	0.0945208	0.131408	0.0731209	0.0590681	0.0712324	0.363111	0.0291575	0.0297067
2002-11-25	0.192961	0.113467	0.0315876	0.139336	0.167307	0.243067	0.203488	0.272275	0.0848781	0.193576	0.0953852	0.0331556	0.161379	0.372536	0.131408	0.219501	0.172716	0.0533875	0.206089	0.179319	0.2849	0.0595597	0.0712324	0.363111	0.0255718	0.138628	0.122554	0.05684	0.0678167	0.0117111	0.103044	0.0764828	0.0460598	0.06725	0.132196	0.0976057	0.0848111	0.0651382	0.114942	0.0848781	0.192207	0.0945208	0.131408	0.0731209	0.0590681	0.0712324	0.363111	0.0291575	0.0297067
2002-11-26	0.193961	0.113867	0.0315876	0.139336	0.167307	0.243067	0.203488	0.272275	0.0848781	0.193576	0.0953852	0.0331556	0.161379	0.372536	0.131408	0.221068	0.172716	0.0721558	0.206089	0.179319	0.2849	0.0595597	0.0712324	0.363111	0.0255718	0.138628	0.122554	0.05684	0.0678167	0.0117111	0.103044	0.0764828	0.0460598	0.06725	0.132196	0.0976057	0.0848111	0.0651382	0.114942	0.0848781	0.192207	0.0945208	0.131408	0.0731209	0.0590681	0.0712324	0.363111	0.0291575	0.0297067
2002-11-27	0.193961	0.113867	0.0315876	0.139336	0.167307	0.243067	0.203488	0.272275	0.0848781	0.193576	0.0953852	0.0331556	0.161379	0.372536	0.131408	0.221068	0.172716	0.0721558	0.206089	0.179319	0.294633	0.0595597	0.0712324	0.363111	0.0255718	0.138628	0.122554	0.05684	0.0678167	0.0117111	0.103044	0.0764828	0.0460598	0.06725	0.132196	0.0976057	0.104544	0.0651382	0.114942	0.0848781	0.192207	0.0945208	0.131408	0.0731209	0.0590681	0.0712324	0.363111	0.0291575	0.0297067
2002-11-28	0.193961	0.113867	0.0315876	0.139336	0.167307	0.243067	0.203488	0.272275	0.0848781	0.193576	0.0953852	0.0331556	0.161379	0.372536	0.131408	0.221068	0.172716	0.0721558	0.206089	0.179319	0.294633	0.0595597	0.0712324	0.363111	0.0255718	0.138628	0.122554	0.05684	0.0678167	0.0117111	0.103044	0.0764828	0.0460598	0.06725	0.132196	0.0976057	0.104544	0.0651382	0.114942	0.0848781	0.192207	0.0945208	0.131408	0.0731209	0.0590681	0.0712324	0.363111	0.0291575	0.0297067
2002-11-29	0.193961	0.113867	0.0315876	0.139336	0.167307	0.243067	0.203488	0.272275	0.0848781	0.194243	0.0953852	0.0331556	0.161379	0.372536	0.131408	0.221068	0.172716	0.0721558	0.206089	0.179319	0.294633	0.0595597	0.0712324	0.363111	0.0255718	0.138628	0.122554	0.05684	0.0678167	0.0117111	0.103044	0.0764828	0.0460598	0.06725	0.132196	0.0976057	0.104544	0.0651382	0.114942	0.0848781	0.192207	0.0945208	0.131408	0.0918891	0.0590681	0.0712324	0.363111	0.0291575	0.0297067
2002-11-30	0.193961	0.113867	0.0315876	0.139336	0.167307	0.243067	0.203488	0.272275	0.0848781	0.194243	0.0953852	0.0331556	0.161379	0.372536	0.131408	0.221068	0.172716	0.0721558	0.206089	0.179319	0.294633	0.0595597	0.0712324	0.363111	0.0255718	0.138628	0.122554	0.05684	0.0678167	0.0117111	0.103044	0.0764828	0.0460598	0.06725	0.132196	0.0976057	0.104544	0.0651382	0.114942	0.0848781	0.192207	0.0945208	0.131408	0.0918891	0.0590681	0.0712324	0.363111	0.0291575	0.0297067
2002-12-01	0.193961	0.113867	0.0315876	0.139336	0.167307	0.243067	0.203488	0.272275	0.0848781	0.194243	0.0953852	0.0331556	0.161379	0.372536	0.131408	0.221068	0.172716	0.0721558	0.206089	0.179319	0.294633	0.0595597	0.0712324	0.363111	0.0255718	0.138628	0.122554	0.05684	0.0678167	0.0117111	0.103044	0.0764828	0.0460598	0.06725	0.132196	0.0976057	0.104544	0.0651382	0.114942	0.0848781	0.192207	0.0945208	0.131408	0.0918891	0.0590681	0.0712324	0.363111	0.0291575	0.0297067
2002-12-02	0.193961	0.113867	0.0315876	0.139336	0.167307	0.243067	0.203488	0.272275	0.0848781	0.194243	0.0953852	0.0331556	0.161379	0.372536	0.131408	0.221068	0.172716	0.0944944	0.206089	0.179319	0.294633	0.0595597	0.0712324	0.363111	0.0255718	0.138628	0.122554	0.05684	0.0678167	0.0117111	0.103044	0.0764828	0.0460598	0.06725	0.132196	0.0976057	0.104544	0.0651382	0.114942	0.0848781	0.192207	0.0945208	0.131408	0.0944944	0.0590681	0.0712324	0.363111	0.0291575	0.0297067
2002-12-03	0.193961	0.113867	0.0315876	0.139336	0.167307	0.243067	0.203488	0.272275	0.0848781	0.194243	0.0953852	0.0331556	0.161379	0.372536	0.131408	0.221068	0.172716	0.0944944	0.206089	0.179319	0.294633	0.0595597	0.0712324	0.363111	0.0255718	0.138628	0.122554	0.05684	0.0678167	0.0117111	0.103044	0.0764828	0.0460598	0.06845	0.132196	0.0976057	0.104544	0.0651382	0.114942	0.0848781	0.192207	0.0945208	0.131408	0.0944944	0.0590681	0.0712324	0.363111	0.0291575	0.0297067
2002-12-04	0.193961	0.113867	0.0315876	0.139336	0.167307	0.243067	0.203488	0.272275	0.0848781	0.194243	0.0953852	0.0331556	0.161379	0.372536	0.131408	0.221068	0.172716	0.0944944	0.206089	0.179319	0.294633	0.0595597	0.0712324	0.363111	0.0255718	0.138628	0.122554	0.05684	0.0678167	0.0117111	0.103044	0.0764828	0.0460598	0.06845	0.188596	0.0976057	0.104544	0.0651382	0.114942	0.0848781	0.192207	0.0945208	0.131408	0.0944944	0.0590681	0.0712324	0.363111	0.0291575	0.0297067
2002-12-05	0.193961	0.113867	0.0315876	0.139336	0.167307	0.243067	0.203488	0.272275	0.0848781	0.194243	0.0953852	0.0331556	0.161379	0.372536	0.131408	0.221068	0.172716	0.0944944	0.206089	0.179319	0.294633	0.0595597	0.0712324	0.363111	0.0255718	0.138628	0.122554	0.05684	0.0678167	0.0117111	0.103044	0.0764828	0.0460598	0.06845	0.188596	0.0976057	0.104544	0.0651382	0.114942	0.0848781	0.192207	0.0945208	0.131408	0.0944944	0.0590681	0.0712324	0.363111	0.0291575	0.0297067
2002-12-06	0.193961	0.113867	0.0315876	0.139336	0.167307	0.243067	0.203488	0.272275	0.0848781	0.194243	0.0953852	0.0331556	0.161379	0.372536	0.131408	0.221068	0.172716	0.0944944	0.206089	0.179319	0.294633	0.0595597	0.0712324	0.363111	0.0255718	0.138628	0.122554	0.05684	0.0678167	0.0117111	0.103044	0.0764828	0.0460598	0.06845	0.188596	0.0976057	0.104544	0.0651382	0.114942	0.0848781	0.192207	0.0945208	0.131408	0.0944944	0.0590681	0.0712324	0.363111	0.0291575	0.0297067
2002-12-07	0.193961	0.113867	0.0315876	0.139336	0.167307	0.243067	0.203488	0.272275	0.0848781	0.194243	0.0953852	0.0331556	0.161379	0.372536	0.131408	0.221068	0.172716	0.0944944	0.206089	0.179319	0.294633	0.0595597	0.0712324	0.363111	0.0255718	0.138628	0.122554	0.05684	0.0678167	0.0117111	0.103044	0.0764828	0.0460598	0.06845	0.188596	0.0976057	0.104544	0.0651382	0.114942	0.0848781	0.192207	0.0945208	0.131408	0.0944944	0.0590681	0.0712324	0.363111	0.0291575	0.0297067
2002-12-08	0.193961	0.113867	0.0315876	0.139336	0.167307	0.243067	0.203488	0.272275	0.0848781	0.194243	0.0953852	0.0331556	0.161379	0.372536	0.131408	0.221068	0.172716	0.0944944	0.206089	0.179319	0.294633	0.0595597	0.0712324	0.363111	0.0255718	0.138628	0.122554	0.05684	0.0678167	0.0117111	0.103044	0.0764828	0.0460598	0.06845	0.188596	0.0976057	0.104544	0.0651382	0.114942	0.0848781	0.192207	0.0945208	0.131408	0.0944944	0.0590681	0.0712324	0.363111	0.0291575	0.0297067
2002-12-09	0.193961	0.113867	0.0315876	0.139336	0.167307	0.243067	0.203488	0.272275	0.0848781	0.194243	0.0953852	0.0331556	0.161379	0.372536	0.131408	0.221068	0.172716	0.0944944	0.206089	0.179319	0.294633	0.0595597	0.0712324	0.363111	0.0268789	0.138628	0.122554	0.05684	0.0678167	0.0117111	0.103044	0.0764828	0.0460598	0.06845	0.188596	0.0976057	0.104544	0.0651382	0.114942	0.0848781	0.192207	0.0945208	0.131408	0.0944944	0.0590681	0.0712324	0.363111	0.0291575	0.0297067
2002-12-10	0.193961	0.113867	0.0315876	0.139336	0.167307	0.243067	0.203488	0.272275	0.0848781	0.194243	0.0953852	0.0331556	0.161379	0.375647	0.131408	0.221068	0.172716	0.0944944	0.206089	0.179319	0.294633	0.0595597	0.0712324	0.363111	0.0268789	0.138628	0.122554	0.05684	0.0678167	0.0117111	0.103044	0.0764828	0.0460598	0.06845	0.188596	0.0976057	0.104544	0.0651382	0.114942	0.0848781	0.192207	0.0945208	0.131408	0.0944944	0.0590681	0.0712324	0.363111	0.0291575	0.0297067
2002-12-11	0.193961	0.113867	0.0315876	0.139336	0.167307	0.243067	0.203488	0.272275	0.0848781	0.194243	0.0953852	0.0331556	0.161379	0.375647	0.131408	0.221068	0.172716	0.0944944	0.206089	0.179319	0.294633	0.0595597	0.0712324	0.363111	0.0268789	0.138628	0.122554	0.05684	0.0678167	0.0117111	0.103044	0.0764828	0.0460598	0.06845	0.188596	0.0976057	0.104544	0.0651382	0.114942	0.0848781	0.192207	0.0945208	0.131408	0.0944944	0.0590681	0.0712324	0.363111	0.0291575	0.0297067
2002-12-12	0.193961	0.113867	0.0315876	0.139336	0.167307	0.243067	0.203488	0.272275	0.0848781	0.194243	0.0953852	0.0331556	0.161379	0.375647	0.131408	0.221068	0.172716	0.0944944	0.206089	0.179319	0.294633	0.0595597	0.0712324	0.363111	0.0268789	0.138628	0.122554	0.05684	0.0678167	0.0117111	0.103044	0.0764828	0.0460598	0.06845	0.188596	0.0976057	0.104544	0.0651382	0.114942	0.0848781	0.192207	0.0945208	0.131408	0.0944944	0.0590681	0.0712324	0.363111	0.0291575	0.0297067
2002-12-13	0.193961	0.113867	0.0315876	0.139336	0.167307	0.243067	0.203488	0.272275	0.0848781	0.194243	0.0953852	0.0331556	0.161379	0.375647	0.131408	0.221068	0.172716	0.0944944	0.206089	0.179319	0.294633	0.0595597	0.0712324	0.363111	0.0268789	0.138628	0.122554	0.05684	0.0678167	0.0117111	0.103044	0.0764828	0.0469931	0.06845	0.188596	0.0976057	0.104544	0.0651382	0.114942	0.0848781	0.192207	0.0945208	0.131408	0.0944944	0.0590681	0.0712324	0.363111	0.0291575	0.0297067
2002-12-14	0.193961	0.113867	0.0315876	0.139336	0.167307	0.243067	0.203488	0.272275	0.0848781	0.194243	0.0953852	0.0331556	0.161379	0.375647	0.131408	0.221068	0.172716	0.0944944	0.206089	0.179319	0.294633	0.0595597	0.0712324	0.363111	0.0268789	0.138628	0.122554	0.05684	0.0678167	0.0117111	0.103044	0.0764828	0.0469931	0.06845	0.188596	0.0976057	0.104544	0.0651382	0.114942	0.0848781	0.192207	0.0945208	0.131408	0.0944944	0.0590681	0.0712324	0.363111	0.0291575	0.0297067
2002-12-15	0.193961	0.113867	0.0315876	0.139336	0.167307	0.243067	0.203488	0.272275	0.0848781	0.194243	0.0953852	0.0331556	0.161379	0.375647	0.131408	0.221068	0.172716	0.0944944	0.206089	0.179319	0.294633	0.0595597	0.0712324	0.363111	0.0268789	0.138628	0.122554	0.05684	0.0678167	0.0117111	0.103044	0.0764828	0.0469931	0.06845	0.188596	0.0976057	0.104544	0.0651382	0.114942	0.0848781	0.192207	0.0945208	0.131408	0.0944944	0.0590681	0.0712324	0.363111	0.0291575	0.0297067
2002-12-16	0.193961	0.113867	0.0315876	0.139336	0.167307	0.243067	0.203488	0.272275	0.0848781	0.194243	0.0953852	0.0331556	0.161379	0.375647	0.131408	0.221068	0.172716	0.0944944	0.206089	0.179319	0.294633	0.0595597	0.0712324	0.363111	0.0268789	0.138628	0.122554	0.05684	0.0678167	0.0117111	0.103044	0.0764828	0.0469931	0.06845	0.188596	0.0976057	0.104544	0.0651382	0.114942	0.0848781	0.192207	0.0945208	0.131408	0.0944944	0.0590681	0.0712324	0.363111	0.0291575	0.0297067
2002-12-17	0.193961	0.113867	0.0315876	0.139336	0.167307	0.243067	0.203488	0.272275	0.0848781	0.194243	0.0953852	0.0331556	0.161379	0.375647	0.131408	0.221068	0.172716	0.0944944	0.206089	0.179319	0.294633	0.0595597	0.0712324	0.363111	0.0268789	0.138628	0.122554	0.05684	0.0678167	0.0117111	0.103044	0.0764828	0.0469931	0.06845	0.188596	0.0976057	0.104544	0.0651382	0.114942	0.0848781	0.192207	0.0945208	0.131408	0.0944944	0.0590681	0.0712324	0.363111	0.0291575	0.0297067
2002-12-18	0.193961	0.113867	0.0315876	0.139336	0.167307	0.243067	0.203488	0.272275	0.0848781	0.194243	0.0953852	0.0331556	0.161379	0.375647	0.131408	0.221068	0.172716	0.0944944	0.206089	0.179319	0.294633	0.0595597	0.0712324	0.363111	0.0268789	0.138628	0.122554	0.05684	0.0678167	0.0117111	0.103044	0.0764828	0.0469931	0.06845	0.188596	0.0976057	0.104544	0.0651382	0.114942	0.0848781	0.192207	0.0945208	0.131408	0.0944944	0.0590681	0.0712324	0.363111	0.0291575	0.0297067
2002-12-19	0.193961	0.113867	0.0315876	0.139336	0.167307	0.243067	0.203488	0.272275	0.0848781	0.194243	0.0953852	0.0331556	0.161379	0.375647	0.131408	0.221068	0.172716	0.0944944	0.206089	0.179319	0.294633	0.0595597	0.0712324	0.363111	0.0268789	0.138628	0.122554	0.05684	0.0678167	0.0117111	0.103044	0.0764828	0.0469931	0.06845	0.188596	0.0976057	0.104544	0.0651382	0.114942	0.0848781	0.192207	0.0945208	0.131408	0.0944944	0.0590681	0.0712324	0.363111	0.0291575	0.0297067
2002-12-20	0.193961	0.113867	0.0315876	0.139336	0.167307	0.243067	0.203488	0.272275	0.0848781	0.194243	0.0953852	0.0331556	0.161379	0.375647	0.131408	0.221068	0.172716	0.0944944	0.206089	0.179319	0.294633	0.0595597	0.0712324	0.363111	0.0268789	0.138628	0.122554	0.05684	0.0678167	0.0117111	0.103044	0.0764828	0.0469931	0.06845	0.188596	0.0976057	0.104544	0.0651382	0.114942	0.0848781	0.192207	0.0945208	0.131408	0.0944944	0.0590681	0.0712324	0.363111	0.0291575	0.0297067
2002-12-21	0.193961	0.113867	0.0315876	0.139336	0.167307	0.243067	0.203488	0.272275	0.0848781	0.194243	0.0953852	0.0331556	0.161379	0.375647	0.131408	0.221068	0.172716	0.0944944	0.206089	0.179319	0.294633	0.0595597	0.0712324	0.363111	0.0268789	0.138628	0.122554	0.05684	0.0678167	0.0117111	0.103044	0.0764828	0.0469931	0.06845	0.188596	0.0976057	0.104544	0.0651382	0.114942	0.0848781	0.192207	0.0945208	0.131408	0.0944944	0.0590681	0.0712324	0.363111	0.0291575	0.0297067
2002-12-22	0.193961	0.113867	0.0315876	0.139336	0.167307	0.243067	0.203488	0.272275	0.0848781	0.194243	0.0953852	0.0331556	0.161379	0.375647	0.131408	0.221068	0.172716	0.0944944	0.206089	0.179319	0.294633	0.0595597	0.0712324	0.363111	0.0268789	0.138628	0.122554	0.05684	0.0678167	0.0117111	0.103044	0.0764828	0.0469931	0.06845	0.188596	0.0976057	0.104544	0.0651382	0.114942	0.0848781	0.192207	0.0945208	0.131408	0.0944944	0.0590681	0.0712324	0.363111	0.0291575	0.0297067
2002-12-23	0.193961	0.113867	0.0315876	0.139336	0.167307	0.243067	0.203488	0.272275	0.0848781	0.194243	0.0953852	0.0331556	0.161379	0.375647	0.131408	0.221068	0.172716	0.0944944	0.206089	0.179319	0.294633	0.0595597	0.0712324	0.363111	0.0268789	0.138628	0.122554	0.05684	0.0678167	0.0117111	0.103044	0.0764828	0.0469931	0.06845	0.188596	0.0976057	0.104544	0.0651382	0.114942	0.0848781	0.192207	0.0945208	0.131408	0.0944944	0.0590681	0.0712324	0.363111	0.0291575	0.0297067
2002-12-24	0.193961	0.113867	0.0315876	0.139336	0.167307	0.243067	0.203488	0.272275	0.0848781	0.194243	0.0953852	0.0331556	0.161379	0.375647	0.131408	0.221068	0.172716	0.0944944	0.206089	0.179319	0.294633	0.0595597	0.0712324	0.363111	0.0268789	0.138628	0.122554	0.05684	0.0678167	0.0117111	0.103044	0.0764828	0.0469931	0.06845	0.188596	0.0976057	0.104544	0.0651382	0.114942	0.0848781	0.192207	0.0945208	0.131408	0.0944944	0.0590681	0.0712324	0.363111	0.0291575	0.0297067
2002-12-25	0.193961	0.113867	0.0315876	0.139336	0.167307	0.243067	0.203488	0.272275	0.0848781	0.194243	0.0953852	0.0331556	0.161379	0.375647	0.131408	0.221068	0.172716	0.0944944	0.206089	0.179319	0.294633	0.0595597	0.0712324	0.363111	0.0268789	0.138628	0.122554	0.05684	0.0678167	0.0117111	0.103044	0.0764828	0.0469931	0.06845	0.188596	0.0976057	0.104544	0.0651382	0.114942	0.0848781	0.192207	0.0945208	0.131408	0.0944944	0.0590681	0.0712324	0.363111	0.0291575	0.0297067
2002-12-26	0.193961	0.113867	0.0315876	0.139336	0.167307	0.243067	0.203488	0.272275	0.0848781	0.194243	0.0953852	0.0331556	0.161379	0.375647	0.131408	0.221068	0.172716	0.0944944	0.206089	0.179319	0.294633	0.0595597	0.0712324	0.363111	0.0284647	0.138628	0.122554	0.05684	0.0678167	0.0117111	0.103044	0.0764828	0.0469931	0.06845	0.188596	0.0976057	0.104544	0.0651382	0.114942	0.0848781	0.192207	0.0945208	0.131408	0.0944944	0.0590681	0.0712324	0.363111	0.0291575	0.0297067
2002-12-27	0.193961	0.113867	0.0315876	0.139336	0.167307	0.243067	0.203488	0.272275	0.0848781	0.194243	0.0953852	0.0331556	0.161379	0.375647	0.131408	0.221068	0.172716	0.0944944	0.206089	0.179319	0.294633	0.0595597	0.0712324	0.363111	0.0284647	0.138628	0.122554	0.05684	0.0678167	0.0117111	0.103044	0.0764828	0.0469931	0.06845	0.188596	0.0976057	0.104544	0.0651382	0.114942	0.0848781	0.192207	0.0945208	0.131408	0.0944944	0.0590681	0.0712324	0.363111	0.0291575	0.0297067
2002-12-28	0.193961	0.113867	0.0315876	0.139336	0.167307	0.243067	0.203488	0.272275	0.0848781	0.194243	0.0953852	0.0331556	0.161379	0.375647	0.131408	0.221068	0.172716	0.0944944	0.206089	0.179319	0.294633	0.0595597	0.0712324	0.363111	0.0284647	0.138628	0.122554	0.05684	0.0678167	0.0117111	0.103044	0.0764828	0.0469931	0.06845	0.188596	0.0976057	0.104544	0.0651382	0.114942	0.0848781	0.192207	0.0945208	0.131408	0.0944944	0.0590681	0.0712324	0.363111	0.0291575	0.0297067
2002-12-29	0.193961	0.113867	0.0315876	0.139336	0.167307	0.243067	0.203488	0.272275	0.0848781	0.194243	0.0953852	0.0331556	0.161379	0.375647	0.131408	0.221068	0.172716	0.0944944	0.206089	0.179319	0.294633	0.0595597	0.0712324	0.363111	0.0284647	0.138628	0.122554	0.05684	0.0678167	0.0117111	0.103044	0.0764828	0.0469931	0.06845	0.188596	0.0976057	0.104544	0.0651382	0.114942	0.0848781	0.192207	0.0945208	0.131408	0.0944944	0.0590681	0.0712324	0.363111	0.0291575	0.0297067
2002-12-30	0.193961	0.113867	0.0315876	0.139336	0.167307	0.243067	0.203488	0.272275	0.0848781	0.194243	0.0965852	0.0331556	0.161379	0.375647	0.131408	0.221068	0.172716	0.0944944	0.206089	0.179319	0.294633	0.0595597	0.0712324	0.363111	0.0284647	0.138628	0.122554	0.05684	0.0678167	0.0117111	0.103044	0.0764828	0.0469931	0.06845	0.188596	0.0976057	0.104544	0.0651382	0.114942	0.0848781	0.192207	0.0945208	0.131408	0.0944944	0.0590681	0.0712324	0.363111	0.0291575	0.0297067
2002-12-31	0.193961	0.113867	0.0315876	0.139336	0.167307	0.243067	0.203488	0.272275	0.0848781	0.194243	0.0965852	0.0331556	0.161379	0.375647	0.131408	0.221068	0.172716	0.0944944	0.206089	0.179319	0.294633	0.0595597	0.0712324	0.363111	0.0291575	0.138628	0.122554	0.05684	0.0678167	0.0117111	0.103044	0.0764828	0.0469931	0.06845	0.188596	0.0976057	0.104544	0.0651382	0.114942	0.0848781	0.192207	0.0945208	0.131408	0.0944944	0.0590681	0.0712324	0.363111	0.0291575	0.0297067
2003-01-01	0.193961	0.113867	0.0315876	0.139336	0.167307	0.243067	0.203488	0.272275	0.0848781	0.194243	0.0965852	0.0331556	0.161379	0.375647	0.131408	0.221068	0.172716	0.0944944	0.206089	0.179319	0.294633	0.0595597	0.0712324	0.363111	0.0291575	0.138628	0.122554	0.05684	0.0678167	0.0117111	0.103044	0.0764828	0.0469931	0.06845	0.188596	0.0976057	0.104544	0.0651382	0.114942	0.0848781	0.192207	0.0945208	0.131408	0.0944944	0.0590681	0.0712324	0.363111	0.0291575	0.0297067
2003-01-02	0.193961	0.113867	0.0315876	0.139336	0.167307	0.243067	0.203488	0.272275	0.0848781	0.194243	0.0965852	0.0331556	0.161379	0.375647	0.131408	0.221068	0.172716	0.0944944	0.206089	0.179319	0.294633	0.0595597	0.0712324	0.363111	0.0291575	0.138628	0.122554	0.05684	0.0678167	0.0117111	0.103044	0.0764828	0.0469931	0.06845	0.188596	0.0976057	0.104544	0.0651382	0.114942	0.0848781	0.192207	0.0945208	0.131408	0.0944944	0.0590681	0.0712324	0.363111	0.0291575	0.0297067
2003-01-03	0.193961	0.113867	0.0315876	0.139336	0.167307	0.243067	0.203488	0.272275	0.0848781	0.194243	0.0965852	0.0331556	0.161379	0.375647	0.131408	0.221068	0.172716	0.0944944	0.206089	0.179319	0.294633	0.0595597	0.0712324	0.363111	0.0291575	0.138628	0.122554	0.05684	0.0678167	0.0117111	0.103044	0.0764828	0.0469931	0.06845	0.188596	0.0976057	0.104544	0.0651382	0.114942	0.0848781	0.192207	0.0945208	0.131408	0.0944944	0.0590681	0.0712324	0.363111	0.0291575	0.0297067
2003-01-04	0.193961	0.113867	0.0315876	0.139336	0.167307	0.243067	0.203488	0.272275	0.0848781	0.194243	0.0965852	0.0331556	0.161379	0.375647	0.131408	0.221068	0.172716	0.0944944	0.206089	0.179319	0.294633	0.0595597	0.0712324	0.363111	0.0291575	0.138628	0.122554	0.05684	0.0678167	0.0117111	0.103044	0.0764828	0.0469931	0.06845	0.188596	0.0976057	0.104544	0.0651382	0.114942	0.0848781	0.192207	0.0945208	0.131408	0.0944944	0.0590681	0.0712324	0.363111	0.0291575	0.0297067
2003-01-05	0.193961	0.113867	0.0315876	0.139336	0.167307	0.243067	0.203488	0.272275	0.0848781	0.194243	0.0965852	0.0331556	0.161379	0.375647	0.131408	0.221068	0.172716	0.0944944	0.206089	0.179319	0.294633	0.0595597	0.0712324	0.363111	0.0291575	0.138628	0.122554	0.05684	0.0678167	0.0117111	0.103044	0.0764828	0.0469931	0.06845	0.188596	0.0976057	0.104544	0.0651382	0.114942	0.0848781	0.192207	0.0945208	0.131408	0.0944944	0.0590681	0.0712324	0.363111	0.0291575	0.0297067
2003-01-06	0.193961	0.113867	0.0315876	0.139336	0.167307	0.243067	0.203488	0.272275	0.0848781	0.194243	0.0965852	0.0331556	0.161379	0.375647	0.131408	0.221668	0.172716	0.0944944	0.206089	0.179319	0.294633	0.0595597	0.0712324	0.363111	0.0291575	0.138628	0.122554	0.05684	0.0678167	0.0117111	0.103044	0.0764828	0.0469931	0.06845	0.188596	0.0976057	0.104544	0.0651382	0.114942	0.0848781	0.192207	0.0945208	0.131408	0.0944944	0.0590681	0.0712324	0.363111	0.0291575	0.0297067
2003-01-07	0.193961	0.113867	0.0315876	0.139336	0.167307	0.243067	0.203488	0.272275	0.0848781	0.194243	0.0965852	0.0331556	0.161379	0.375647	0.131408	0.221668	0.172716	0.0944944	0.206089	0.179319	0.294633	0.0595597	0.0712324	0.363111	0.0291575	0.138628	0.122554	0.05684	0.0678167	0.0117111	0.103044	0.0764828	0.0469931	0.06845	0.188596	0.0976057	0.104544	0.0651382	0.114942	0.0848781	0.192207	0.0945208	0.131408	0.0944944	0.0590681	0.0712324	0.363111	0.0291575	0.0297067
2003-01-08	0.193961	0.113867	0.0315876	0.139336	0.167307	0.243067	0.203488	0.272275	0.0848781	0.194243	0.0965852	0.0331556	0.161379	0.375647	0.131408	0.221668	0.172716	0.0944944	0.206089	0.179319	0.294633	0.0595597	0.0712324	0.363111	0.0291575	0.138628	0.122554	0.05684	0.0678167	0.0117111	0.103044	0.0764828	0.0469931	0.06845	0.188596	0.0976057	0.104544	0.0651382	0.114942	0.0848781	0.192207	0.0945208	0.131408	0.0944944	0.0590681	0.0712324	0.363111	0.0291575	0.0297067
2003-01-09	0.193961	0.113867	0.0315876	0.139336	0.167307	0.243067	0.203488	0.272275	0.0848781	0.193843	0.0965852	0.0331556	0.161379	0.375647	0.131408	0.221668	0.172716	0.0944944	0.206089	0.179319	0.294633	0.0595597	0.0712324	0.363111	0.0291575	0.138628	0.122554	0.05684	0.0678167	0.0117111	0.103044	0.0764828	0.0469931	0.06845	0.188596	0.0976057	0.104544	0.0651382	0.114942	0.0848781	0.192207	0.0945208	0.131408	0.0944944	0.0590681	0.0712324	0.363111	0.0291575	0.0297067
2003-01-10	0.193961	0.113867	0.0315876	0.139336	0.167307	0.243067	0.203488	0.272275	0.0848781	0.193843	0.0965852	0.0331556	0.161379	0.375647	0.131408	0.221668	0.172716	0.0944944	0.206089	0.179319	0.294633	0.0595597	0.0712324	0.363111	0.0291575	0.138628	0.122554	0.05684	0.0678167	0.0117111	0.103044	0.0764828	0.0469931	0.06845	0.188596	0.0976057	0.104544	0.0651382	0.114942	0.0848781	0.192207	0.0945208	0.131408	0.0944944	0.0590681	0.0712324	0.363111	0.0291575	0.0297067
2003-01-11	0.193961	0.113867	0.0315876	0.139336	0.167307	0.243067	0.203488	0.272275	0.0848781	0.193843	0.0965852	0.0331556	0.161379	0.375647	0.131408	0.221668	0.172716	0.0944944	0.206089	0.179319	0.294633	0.0595597	0.0712324	0.363111	0.0291575	0.138628	0.122554	0.05684	0.0678167	0.0117111	0.103044	0.0764828	0.0469931	0.06845	0.188596	0.0976057	0.104544	0.0651382	0.114942	0.0848781	0.192207	0.0945208	0.131408	0.0944944	0.0590681	0.0712324	0.363111	0.0291575	0.0297067
2003-01-12	0.193961	0.113867	0.0315876	0.139336	0.167307	0.243067	0.203488	0.272275	0.0848781	0.193843	0.0965852	0.0331556	0.161379	0.375647	0.131408	0.221668	0.172716	0.0944944	0.206089	0.179319	0.294633	0.0595597	0.0712324	0.363111	0.0291575	0.138628	0.122554	0.05684	0.0678167	0.0117111	0.103044	0.0764828	0.0469931	0.06845	0.188596	0.0976057	0.104544	0.0651382	0.114942	0.0848781	0.192207	0.0945208	0.131408	0.0944944	0.0590681	0.0712324	0.363111	0.0291575	0.0297067
2003-01-13	0.193961	0.113867	0.0315876	0.139336	0.167307	0.243067	0.203488	0.272275	0.0848781	0.193843	0.0965852	0.0331556	0.161379	0.375647	0.131408	0.221668	0.172716	0.0944944	0.206089	0.179319	0.294633	0.0595597	0.0712324	0.363111	0.0291575	0.138628	0.122554	0.05684	0.0678167	0.0117111	0.103044	0.0764828	0.0469931	0.06845	0.188596	0.0976057	0.104544	0.0651382	0.114942	0.0848781	0.192207	0.0945208	0.131408	0.0944944	0.0590681	0.0712324	0.363111	0.0291575	0.0297067
2003-01-14	0.193961	0.113867	0.0315876	0.139336	0.167307	0.243067	0.203488	0.272275	0.0848781	0.193843	0.0965852	0.0331556	0.161379	0.375647	0.131408	0.221668	0.172716	0.0944944	0.206089	0.179319	0.294633	0.0595597	0.0712324	0.363111	0.0291575	0.138628	0.122554	0.05684	0.0678167	0.0117111	0.103044	0.0764828	0.0469931	0.06845	0.188596	0.0976057	0.104544	0.0651382	0.114942	0.0848781	0.192207	0.0945208	0.131408	0.0944944	0.0590681	0.0712324	0.363111	0.0291575	0.0297067
2003-01-15	0.193961	0.113867	0.0315876	0.139336	0.167307	0.243067	0.203488	0.272275	0.0848781	0.193843	0.0965852	0.0331556	0.161379	0.375647	0.131408	0.221668	0.172716	0.0944944	0.206089	0.179319	0.294633	0.0595597	0.0712324	0.363111	0.0291575	0.138628	0.122554	0.05684	0.0678167	0.0117111	0.103044	0.0764828	0.0469931	0.06845	0.188596	0.0976057	0.104544	0.0651382	0.114942	0.0848781	0.192207	0.0945208	0.131408	0.0944944	0.0590681	0.0712324	0.363111	0.0291575	0.0297067
2003-01-16	0.193961	0.113867	0.0315876	0.139336	0.167307	0.243067	0.203488	0.272275	0.0848781	0.193843	0.0965852	0.0331556	0.161379	0.375647	0.131408	0.221668	0.172716	0.0944944	0.206089	0.179319	0.294633	0.0595597	0.0712324	0.363111	0.0291575	0.138628	0.122554	0.05684	0.0678167	0.0117111	0.103044	0.0764828	0.0469931	0.06845	0.188596	0.0976057	0.104544	0.0651382	0.114942	0.0848781	0.192207	0.0945208	0.131408	0.0944944	0.0590681	0.0712324	0.363111	0.0291575	0.0297067
2003-01-17	0.193961	0.113867	0.0315876	0.139336	0.167307	0.243067	0.203488	0.272275	0.0848781	0.193843	0.0965852	0.0331556	0.161379	0.375647	0.131408	0.221668	0.172716	0.0944944	0.206089	0.179319	0.294633	0.0595597	0.0712324	0.363111	0.0291575	0.138628	0.122554	0.05684	0.0678167	0.0117111	0.103044	0.0764828	0.0469931	0.06845	0.188596	0.0976057	0.104544	0.0651382	0.114942	0.0848781	0.192207	0.0945208	0.131408	0.0944944	0.0590681	0.0712324	0.363111	0.0291575	0.0297067
2003-01-18	0.193961	0.113867	0.0315876	0.139336	0.167307	0.243067	0.203488	0.272275	0.0848781	0.193843	0.0965852	0.0331556	0.161379	0.375647	0.131408	0.221668	0.172716	0.0944944	0.206089	0.179319	0.294633	0.0595597	0.0712324	0.363111	0.0291575	0.138628	0.122554	0.05684	0.0678167	0.0117111	0.103044	0.0764828	0.0469931	0.06845	0.188596	0.0976057	0.104544	0.0651382	0.114942	0.0848781	0.192207	0.0945208	0.131408	0.0944944	0.0590681	0.0712324	0.363111	0.0291575	0.0297067
2003-01-19	0.193961	0.113867	0.0315876	0.139336	0.167307	0.243067	0.203488	0.272275	0.0848781	0.193843	0.0965852	0.0331556	0.157379	0.375647	0.131408	0.221668	0.172716	0.0944944	0.206089	0.179319	0.294633	0.0595597	0.0712324	0.363111	0.0291575	0.138628	0.122554	0.05684	0.0678167	0.0117111	0.103044	0.0764828	0.0469931	0.06845	0.188596	0.0976057	0.104544	0.0651382	0.114942	0.0848781	0.192207	0.0945208	0.131408	0.0944944	0.0590681	0.0712324	0.363111	0.0291575	0.0297067
2003-01-20	0.193961	0.113867	0.0315876	0.139336	0.167307	0.243067	0.203488	0.272275	0.0848781	0.193843	0.0965852	0.0331556	0.157379	0.375647	0.131408	0.221668	0.172716	0.0944944	0.206089	0.179319	0.294633	0.0595597	0.0712324	0.363111	0.0291575	0.138628	0.122554	0.05684	0.0678167	0.0117111	0.103044	0.0764828	0.0469931	0.06845	0.188596	0.0976057	0.104544	0.0651382	0.114942	0.0848781	0.192207	0.0945208	0.131408	0.0944944	0.0590681	0.0712324	0.363111	0.0291575	0.0297067
2003-01-21	0.193961	0.113867	0.0315876	0.139336	0.167307	0.243067	0.203488	0.272275	0.0848781	0.193843	0.0965852	0.0331556	0.157379	0.375647	0.131408	0.221668	0.172716	0.0944944	0.206089	0.179319	0.294633	0.0595597	0.0712324	0.363111	0.0291575	0.138628	0.122554	0.05684	0.0678167	0.0117111	0.103044	0.0764828	0.0469931	0.06845	0.188596	0.0976057	0.104544	0.0651382	0.114942	0.0848781	0.192207	0.0945208	0.131408	0.0944944	0.0590681	0.0712324	0.363111	0.0291575	0.0297067
2003-01-22	0.193961	0.113867	0.0315876	0.139336	0.167307	0.243067	0.203488	0.272275	0.0848781	0.193843	0.0965852	0.0331556	0.157379	0.375647	0.131408	0.221668	0.172716	0.0944944	0.206089	0.179319	0.294633	0.0595597	0.0712324	0.363111	0.0291575	0.138628	0.122554	0.05684	0.0678167	0.0117111	0.103044	0.0764828	0.0469931	0.06845	0.188596	0.0976057	0.104544	0.0651382	0.114942	0.0848781	0.192207	0.0945208	0.131408	0.0944944	0.0590681	0.0712324	0.363111	0.0291575	0.0297067
2003-01-23	0.193961	0.113867	0.0315876	0.139336	0.167307	0.243067	0.203488	0.272275	0.0848781	0.193843	0.0965852	0.0331556	0.157379	0.375647	0.131408	0.221668	0.172716	0.0944944	0.206089	0.179319	0.294633	0.0595597	0.0712324	0.363111	0.0291575	0.138628	0.122554	0.05684	0.0678167	0.0117111	0.103044	0.0764828	0.0469931	0.06845	0.188596	0.0976057	0.104544	0.0651382	0.114942	0.0848781	0.192207	0.0945208	0.131408	0.0944944	0.0590681	0.0712324	0.363111	0.0291575	0.0297067
2003-01-24	0.193961	0.113867	0.0315876	0.139336	0.167307	0.243067	0.203488	0.272275	0.0848781	0.193843	0.0965852	0.0331556	0.157379	0.375647	0.131408	0.221668	0.172716	0.0944944	0.206089	0.179319	0.294633	0.0595597	0.0712324	0.363111	0.0291575	0.138628	0.122554	0.05684	0.0678167	0.0117111	0.103044	0.0764828	0.0469931	0.06845	0.188596	0.0976057	0.104544	0.0651382	0.114942	0.0848781	0.192207	0.0945208	0.131408	0.0944944	0.0590681	0.0712324	0.363111	0.0291575	0.0297067
2003-01-25	0.193961	0.113867	0.0315876	0.139336	0.167307	0.243067	0.203488	0.272275	0.0848781	0.193843	0.0965852	0.0331556	0.157379	0.375647	0.131408	0.221668	0.172716	0.0944944	0.206089	0.179319	0.294633	0.0595597	0.0712324	0.363111	0.0291575	0.138628	0.122554	0.05684	0.0678167	0.0117111	0.103044	0.0764828	0.0469931	0.06845	0.188596	0.0976057	0.104544	0.0651382	0.114942	0.0848781	0.192207	0.0945208	0.131408	0.0944944	0.0590681	0.0712324	0.363111	0.0291575	0.0297067
2003-01-26	0.193961	0.113867	0.0315876	0.139336	0.167307	0.243067	0.203488	0.272275	0.0848781	0.193843	0.0965852	0.0331556	0.157379	0.375647	0.131408	0.221668	0.172716	0.0944944	0.206089	0.179319	0.294633	0.0595597	0.0712324	0.363111	0.0291575	0.138628	0.122554	0.05684	0.0678167	0.0117111	0.103044	0.0764828	0.0469931	0.06845	0.188596	0.0976057	0.104544	0.0651382	0.114942	0.0848781	0.192207	0.0945208	0.131408	0.0944944	0.0590681	0.0712324	0.363111	0.0291575	0.0297067
2003-01-27	0.193961	0.113867	0.0315876	0.139336	0.167307	0.243067	0.203488	0.272275	0.0848781	0.193843	0.0965852	0.0331556	0.157379	0.375647	0.131408	0.221668	0.172716	0.0944944	0.206089	0.179319	0.294633	0.0595597	0.0712324	0.363111	0.0291575	0.138628	0.122554	0.05684	0.0678167	0.0117111	0.103044	0.0764828	0.0469931	0.06845	0.188596	0.0976057	0.104544	0.0651382	0.114942	0.0848781	0.192207	0.0945208	0.131408	0.0944944	0.0590681	0.0712324	0.363111	0.0291575	0.0297067
2003-01-28	0.193961	0.113867	0.0315876	0.139336	0.167307	0.243067	0.203488	0.272275	0.0848781	0.193843	0.0965852	0.0331556	0.157379	0.375647	0.131408	0.221668	0.172716	0.0944944	0.206089	0.179319	0.294633	0.0595597	0.0712324	0.363111	0.0291575	0.138628	0.122554	0.05684	0.0678167	0.0117111	0.103044	0.0764828	0.0469931	0.06845	0.188596	0.0976057	0.104544	0.0651382	0.114942	0.0848781	0.192207	0.0945208	0.131408	0.0944944	0.0590681	0.0712324	0.363111	0.0291575	0.0297067
2003-01-29	0.193961	0.113867	0.0315876	0.139336	0.167307	0.243067	0.203488	0.272275	0.0848781	0.193843	0.0965852	0.0331556	0.157379	0.375647	0.131408	0.221668	0.172716	0.0944944	0.206089	0.179319	0.294633	0.0595597	0.0712324	0.363111	0.0291575	0.138628	0.122554	0.05684	0.0678167	0.0117111	0.103044	0.0764828	0.0469931	0.06845	0.188596	0.0976057	0.104544	0.0651382	0.114942	0.0848781	0.192207	0.0945208	0.131408	0.0944944	0.0590681	0.0712324	0.363111	0.0291575	0.0297067
2003-01-30	0.193961	0.113867	0.0315876	0.139336	0.167307	0.243067	0.203488	0.272275	0.0848781	0.193843	0.0965852	0.0331556	0.157379	0.375647	0.131408	0.221668	0.172716	0.0944944	0.206089	0.179319	0.294633	0.0595597	0.0712324	0.363111	0.0291575	0.138628	0.122554	0.05684	0.0678167	0.0117111	0.103044	0.0764828	0.0469931	0.06845	0.188596	0.0976057	0.104544	0.0651382	0.114942	0.0848781	0.192207	0.0945208	0.131408	0.0944944	0.0590681	0.0712324	0.363111	0.0291575	0.0297067
2003-01-31	0.193961	0.113867	0.0315876	0.139336	0.167307	0.243067	0.203488	0.272275	0.0848781	0.193843	0.0965852	0.0331556	0.157379	0.375647	0.131408	0.221668	0.172716	0.0944944	0.206089	0.179319	0.294633	0.0595597	0.0712324	0.363111	0.0291575	0.138628	0.122554	0.05684	0.0678167	0.0117111	0.103044	0.0764828	0.0469931	0.06845	0.188596	0.0976057	0.104544	0.0651382	0.114942	0.0848781	0.192207	0.0945208	0.131408	0.0944944	0.0590681	0.0712324	0.363111	0.0291575	0.0297067
2003-02-01	0.193961	0.113867	0.0315876	0.139336	0.167307	0.243067	0.203488	0.272275	0.0848781	0.193843	0.0965852	0.0331556	0.157379	0.375647	0.131408	0.221668	0.172716	0.0944944	0.206089	0.179319	0.294633	0.0595597	0.0712324	0.363111	0.0291575	0.138628	0.122554	0.05684	0.0678167	0.0117111	0.103044	0.0764828	0.0469931	0.06845	0.188596	0.0976057	0.104544	0.0651382	0.114942	0.0848781	0.192207	0.0945208	0.131408	0.0944944	0.0590681	0.0712324	0.363111	0.0291575	0.0297067
2003-02-02	0.193961	0.113867	0.0315876	0.139336	0.167307	0.243067	0.203488	0.272275	0.0848781	0.193843	0.0965852	0.0331556	0.157379	0.375647	0.131408	0.221668	0.172716	0.0944944	0.206089	0.179319	0.294633	0.0595597	0.0712324	0.363111	0.0291575	0.138628	0.122554	0.05684	0.0678167	0.0117111	0.103044	0.0764828	0.0469931	0.06845	0.188596	0.0976057	0.104544	0.0651382	0.114942	0.0848781	0.192207	0.0945208	0.131408	0.0944944	0.0590681	0.0712324	0.363111	0.0291575	0.0297067
2003-02-03	0.193961	0.113867	0.0315876	0.139336	0.167307	0.243067	0.203488	0.272275	0.0848781	0.193843	0.0965852	0.0331556	0.157379	0.375647	0.131408	0.221668	0.172716	0.0944944	0.206089	0.179319	0.294633	0.0595597	0.0712324	0.363111	0.0291575	0.138628	0.122554	0.05684	0.0678167	0.0117111	0.103044	0.0764828	0.0469931	0.06845	0.188596	0.0976057	0.104544	0.0651382	0.114942	0.0848781	0.192207	0.0945208	0.131408	0.0944944	0.0590681	0.0712324	0.363111	0.0291575	0.0297067
2003-02-04	0.193961	0.113867	0.0315876	0.139336	0.167307	0.243067	0.203488	0.272275	0.0848781	0.193843	0.0965852	0.0331556	0.157379	0.375647	0.131408	0.221668	0.172716	0.0944944	0.206089	0.179319	0.294633	0.0595597	0.0712324	0.363111	0.0291575	0.138628	0.122554	0.05684	0.0678167	0.0117111	0.103044	0.0764828	0.0469931	0.06845	0.188596	0.0976057	0.104544	0.0651382	0.114942	0.0848781	0.192207	0.0945208	0.131408	0.0944944	0.0590681	0.0712324	0.363111	0.0291575	0.0297067
2003-02-05	0.193961	0.113867	0.0315876	0.139336	0.167307	0.243067	0.203488	0.272275	0.0848781	0.193843	0.0965852	0.0331556	0.157379	0.375647	0.131408	0.221668	0.172716	0.0944944	0.206089	0.179319	0.294633	0.0595597	0.0712324	0.363111	0.0291575	0.138628	0.122554	0.05684	0.0678167	0.0117111	0.103044	0.0764828	0.0469931	0.06845	0.188596	0.0976057	0.104544	0.0651382	0.114942	0.0848781	0.192207	0.0945208	0.131408	0.0944944	0.0590681	0.0712324	0.363111	0.0291575	0.0297067
2003-02-06	0.193961	0.113867	0.0315876	0.139336	0.167307	0.243067	0.203488	0.272275	0.0848781	0.193843	0.0965852	0.0331556	0.157379	0.375647	0.131408	0.221668	0.172716	0.0944944	0.206089	0.179319	0.294633	0.0595597	0.0712324	0.363111	0.0291575	0.138628	0.122554	0.05684	0.0678167	0.0117111	0.103044	0.0764828	0.0469931	0.06845	0.188596	0.0976057	0.104544	0.0651382	0.114942	0.0848781	0.192207	0.0945208	0.131408	0.0944944	0.0590681	0.0712324	0.363111	0.0291575	0.0297067
2003-02-07	0.193961	0.113867	0.0315876	0.139336	0.167307	0.243067	0.203488	0.272275	0.0848781	0.193843	0.0965852	0.0331556	0.157379	0.375647	0.131408	0.221668	0.172716	0.0944944	0.206089	0.179319	0.294633	0.0595597	0.0712324	0.363111	0.0291575	0.138628	0.122554	0.05684	0.0678167	0.0117111	0.103044	0.0764828	0.0469931	0.06845	0.188596	0.0976057	0.104544	0.0651382	0.114942	0.0848781	0.192207	0.0945208	0.131408	0.0944944	0.0590681	0.0712324	0.363111	0.0291575	0.0297067
2003-02-08	0.193961	0.113867	0.0315876	0.139336	0.167307	0.243067	0.203488	0.272275	0.0848781	0.193843	0.0965852	0.0331556	0.157379	0.375647	0.131408	0.221668	0.172716	0.0944944	0.206089	0.179319	0.294633	0.0595597	0.0712324	0.363111	0.0291575	0.138628	0.122554	0.05684	0.0678167	0.0117111	0.103044	0.0764828	0.0469931	0.06845	0.188596	0.0976057	0.104544	0.0651382	0.114942	0.0848781	0.192207	0.0945208	0.131408	0.0944944	0.0590681	0.0712324	0.363111	0.0291575	0.0297067
2003-02-09	0.193961	0.113867	0.0315876	0.139336	0.167307	0.243067	0.203488	0.272275	0.0848781	0.193843	0.0965852	0.0331556	0.157379	0.375647	0.131408	0.221668	0.172716	0.0944944	0.206089	0.179319	0.294633	0.0595597	0.0712324	0.363111	0.0291575	0.138628	0.122554	0.05684	0.0678167	0.0117111	0.103044	0.0764828	0.0469931	0.06845	0.188596	0.0976057	0.104544	0.0651382	0.114942	0.0848781	0.192207	0.0945208	0.131408	0.0944944	0.0590681	0.0712324	0.363111	0.0291575	0.0297067
2003-02-10	0.193961	0.113867	0.0315876	0.139336	0.167307	0.243067	0.203488	0.272275	0.0848781	0.193843	0.0965852	0.0331556	0.157379	0.375647	0.131408	0.221668	0.172716	0.0944944	0.206089	0.179319	0.294633	0.0595597	0.0712324	0.363111	0.0291575	0.138628	0.122554	0.05684	0.0678167	0.0117111	0.103044	0.0764828	0.0469931	0.06845	0.188596	0.0976057	0.104544	0.0651382	0.114942	0.0848781	0.192207	0.0945208	0.131408	0.0944944	0.0590681	0.0712324	0.363111	0.0291575	0.0297067
2003-02-11	0.193961	0.113867	0.0315876	0.139336	0.167307	0.243067	0.203488	0.272275	0.0848781	0.193843	0.0965852	0.0331556	0.157379	0.375647	0.131408	0.221668	0.172716	0.0944944	0.206089	0.179319	0.294633	0.0595597	0.0712324	0.363111	0.0291575	0.138628	0.122554	0.05684	0.0678167	0.0117111	0.103044	0.0764828	0.0469931	0.06845	0.188596	0.0976057	0.104544	0.0651382	0.114942	0.0848781	0.192207	0.0945208	0.131408	0.0944944	0.0590681	0.0712324	0.363111	0.0291575	0.0297067
2003-02-12	0.193961	0.113867	0.0315876	0.139336	0.167307	0.243067	0.203488	0.272275	0.0848781	0.193843	0.0965852	0.0331556	0.157379	0.375647	0.131408	0.221668	0.172716	0.0944944	0.206089	0.179319	0.294633	0.0595597	0.0712324	0.363111	0.0291575	0.138628	0.122554	0.05684	0.0678167	0.0117111	0.103044	0.0764828	0.0469931	0.06845	0.188596	0.0976057	0.104544	0.0651382	0.114942	0.0848781	0.192207	0.0945208	0.131408	0.0944944	0.0590681	0.0712324	0.363111	0.0291575	0.0297067
2003-02-13	0.193961	0.113867	0.0315876	0.139336	0.167307	0.243067	0.203488	0.272275	0.0848781	0.193843	0.0965852	0.0331556	0.157379	0.375647	0.131408	0.221668	0.172716	0.0944944	0.206089	0.179319	0.294633	0.0595597	0.0712324	0.363111	0.0291575	0.138628	0.122554	0.05684	0.0678167	0.0117111	0.103044	0.0764828	0.0469931	0.06845	0.188596	0.0976057	0.104544	0.0651382	0.114942	0.0848781	0.192207	0.0945208	0.131408	0.0944944	0.0590681	0.0712324	0.363111	0.0291575	0.0297067
2003-02-14	0.193961	0.113867	0.0315876	0.139336	0.167307	0.243067	0.203488	0.272275	0.0848781	0.193843	0.0965852	0.0331556	0.157379	0.375647	0.131408	0.221668	0.172716	0.0944944	0.206089	0.179319	0.294633	0.0595597	0.0712324	0.363111	0.0291575	0.138628	0.122554	0.05684	0.0678167	0.0117111	0.103044	0.0764828	0.0469931	0.06845	0.188596	0.0976057	0.104544	0.0651382	0.114942	0.0848781	0.192207	0.0945208	0.131408	0.0944944	0.0590681	0.0712324	0.363111	0.0291575	0.0297067
2003-02-15	0.193961	0.113867	0.0315876	0.139336	0.167307	0.243067	0.203488	0.272275	0.0848781	0.193843	0.0965852	0.0331556	0.157379	0.375647	0.131408	0.221668	0.172716	0.0944944	0.206089	0.179319	0.294633	0.0595597	0.0712324	0.363111	0.0291575	0.138628	0.122554	0.05684	0.0678167	0.0117111	0.103044	0.0764828	0.0469931	0.06845	0.188596	0.0976057	0.104544	0.0651382	0.114942	0.0848781	0.192207	0.0945208	0.131408	0.0944944	0.0590681	0.0712324	0.363111	0.0291575	0.0297067
2003-02-16	0.193961	0.113867	0.0315876	0.139336	0.167307	0.243067	0.203488	0.272275	0.0848781	0.193843	0.0965852	0.0331556	0.157379	0.375647	0.131408	0.221668	0.172716	0.0944944	0.206089	0.179319	0.294633	0.0595597	0.0712324	0.363111	0.0291575	0.138628	0.122554	0.05684	0.0678167	0.0117111	0.103044	0.0764828	0.0469931	0.06845	0.188596	0.0976057	0.104544	0.0651382	0.114942	0.0848781	0.192207	0.0945208	0.131408	0.0944944	0.0590681	0.0712324	0.363111	0.0291575	0.0297067
2003-02-17	0.193961	0.113867	0.0315876	0.139336	0.167307	0.243067	0.203488	0.272275	0.0848781	0.193843	0.0965852	0.0331556	0.157379	0.375647	0.131408	0.221668	0.172716	0.0944944	0.206089	0.179319	0.294633	0.0595597	0.0712324	0.363111	0.0291575	0.138628	0.122554	0.05684	0.0678167	0.0117111	0.103044	0.0764828	0.0469931	0.06845	0.188596	0.0976057	0.104544	0.0651382	0.114942	0.0848781	0.192207	0.0945208	0.131408	0.0944944	0.0590681	0.0712324	0.363111	0.0291575	0.0297067
2003-02-18	0.193961	0.113867	0.0315876	0.139336	0.167307	0.243067	0.203488	0.272275	0.0848781	0.193843	0.0965852	0.0331556	0.157379	0.375647	0.131408	0.221668	0.172716	0.0944944	0.206089	0.179319	0.294633	0.0595597	0.0712324	0.363111	0.0291575	0.138628	0.122554	0.05684	0.0678167	0.0117111	0.103044	0.0764828	0.0469931	0.06845	0.188596	0.0976057	0.104544	0.0651382	0.114942	0.0848781	0.192207	0.0945208	0.131408	0.0944944	0.0590681	0.0712324	0.363111	0.0291575	0.0297067
2003-02-19	0.193961	0.113867	0.0315876	0.139336	0.167307	0.243067	0.203488	0.272275	0.0848781	0.193843	0.0965852	0.0331556	0.157379	0.375647	0.131408	0.221668	0.172716	0.0944944	0.206089	0.179319	0.294633	0.0595597	0.0712324	0.363111	0.0291575	0.138628	0.122554	0.05684	0.0678167	0.0117111	0.103044	0.0764828	0.0469931	0.06845	0.188596	0.0976057	0.104544	0.0651382	0.114942	0.0848781	0.192207	0.0945208	0.131408	0.0944944	0.0590681	0.0712324	0.363111	0.0291575	0.0297067
2003-02-20	0.193961	0.113867	0.0315876	0.139336	0.167307	0.243067	0.203488	0.272275	0.0848781	0.193843	0.0965852	0.0331556	0.157379	0.375647	0.131408	0.221668	0.172716	0.0944944	0.206089	0.179319	0.294633	0.0595597	0.0712324	0.363111	0.0291575	0.138628	0.122554	0.05684	0.0678167	0.0117111	0.103044	0.0764828	0.0469931	0.06845	0.188596	0.0976057	0.104544	0.0651382	0.114942	0.0848781	0.192207	0.0945208	0.131408	0.0944944	0.0590681	0.0712324	0.363111	0.0291575	0.0297067
2003-02-21	0.193961	0.113867	0.0315876	0.139336	0.167307	0.243067	0.203488	0.272275	0.0848781	0.193843	0.0965852	0.0331556	0.157379	0.375647	0.131408	0.221668	0.172716	0.0944944	0.206089	0.179319	0.294633	0.0595597	0.0712324	0.363111	0.0291575	0.138628	0.122554	0.05684	0.0678167	0.0117111	0.103044	0.0764828	0.0469931	0.06845	0.188596	0.0976057	0.104544	0.0651382	0.114942	0.0848781	0.192207	0.0945208	0.131408	0.0944944	0.0590681	0.0712324	0.363111	0.0291575	0.0297067
2003-02-22	0.193961	0.113867	0.0315876	0.139336	0.167307	0.243067	0.203488	0.272275	0.0848781	0.193843	0.0965852	0.0331556	0.157379	0.375647	0.131408	0.221668	0.172716	0.0944944	0.206089	0.179319	0.294633	0.0595597	0.0712324	0.363111	0.0291575	0.138628	0.122554	0.05684	0.0678167	0.0117111	0.103044	0.0764828	0.0469931	0.06845	0.188596	0.0976057	0.104544	0.0651382	0.114942	0.0848781	0.192207	0.0945208	0.131408	0.0944944	0.0590681	0.0712324	0.363111	0.0291575	0.0297067
2003-02-23	0.193961	0.113867	0.0315876	0.139336	0.167307	0.243067	0.203488	0.272275	0.0848781	0.193843	0.0965852	0.0331556	0.157379	0.375647	0.131408	0.221668	0.172716	0.0944944	0.206089	0.179319	0.294633	0.0595597	0.0712324	0.363111	0.0291575	0.138628	0.122554	0.05684	0.0678167	0.0117111	0.103044	0.0764828	0.0469931	0.06845	0.188596	0.0976057	0.104544	0.0651382	0.114942	0.0848781	0.192207	0.0945208	0.131408	0.0944944	0.0590681	0.0712324	0.363111	0.0291575	0.0297067
2003-02-24	0.193961	0.113867	0.0315876	0.139336	0.167307	0.243067	0.203488	0.272275	0.0848781	0.193843	0.0965852	0.0331556	0.157379	0.375647	0.131408	0.221668	0.172716	0.0944944	0.206089	0.179319	0.294633	0.0595597	0.0712324	0.363111	0.0291575	0.138628	0.122554	0.05684	0.0678167	0.0117111	0.103044	0.0764828	0.0469931	0.06845	0.188596	0.0976057	0.104544	0.0651382	0.114942	0.0848781	0.192207	0.0945208	0.131408	0.0944944	0.0590681	0.0712324	0.363111	0.0291575	0.0297067
2003-02-25	0.193961	0.113867	0.0315876	0.139336	0.167307	0.243067	0.203488	0.272275	0.0848781	0.193843	0.0965852	0.0331556	0.157379	0.375647	0.131408	0.221668	0.172716	0.0944944	0.206089	0.179319	0.294633	0.0595597	0.0712324	0.363111	0.0291575	0.138628	0.122554	0.05684	0.0678167	0.0117111	0.103044	0.0764828	0.0469931	0.06845	0.188596	0.0976057	0.104544	0.0651382	0.114942	0.0848781	0.192207	0.0945208	0.131408	0.0944944	0.0590681	0.0712324	0.363111	0.0291575	0.0297067
2003-02-26	0.193961	0.113867	0.0315876	0.139336	0.167307	0.243067	0.203488	0.272275	0.0848781	0.193843	0.0965852	0.0331556	0.157379	0.375647	0.131408	0.221668	0.172716	0.0944944	0.206089	0.179319	0.294633	0.0595597	0.0712324	0.363111	0.0291575	0.138628	0.122554	0.05684	0.0678167	0.0117111	0.103044	0.0764828	0.0469931	0.06845	0.188596	0.0976057	0.104544	0.0651382	0.114942	0.0848781	0.192207	0.0945208	0.131408	0.0944944	0.0590681	0.0712324	0.363111	0.0291575	0.0297067
2003-02-27	0.193961	0.113867	0.0315876	0.139336	0.167307	0.243067	0.203488	0.272275	0.0848781	0.193843	0.0965852	0.0331556	0.157379	0.375647	0.131408	0.221668	0.172716	0.0944944	0.206089	0.179319	0.294633	0.0595597	0.0712324	0.363111	0.0291575	0.138628	0.122554	0.05684	0.0678167	0.0117111	0.103044	0.0764828	0.0469931	0.06845	0.188596	0.0976057	0.104544	0.0651382	0.114942	0.0848781	0.192207	0.0945208	0.131408	0.0944944	0.0590681	0.0712324	0.363111	0.0291575	0.0297067
2003-02-28	0.193961	0.113867	0.0315876	0.139336	0.167307	0.243067	0.203488	0.272275	0.0848781	0.193843	0.0965852	0.0331556	0.157379	0.375647	0.131408	0.221668	0.172716	0.0944944	0.206089	0.179319	0.294633	0.0595597	0.0712324	0.363111	0.0291575	0.138628	0.122554	0.05684	0.0678167	0.0117111	0.103044	0.0764828	0.0469931	0.06845	0.188596	0.0976057	0.104544	0.0651382	0.114942	0.0848781	0.192207	0.0945208	0.131408	0.0944944	0.0590681	0.0712324	0.363111	0.0291575	0.0297067
2003-03-01	0.193961	0.113867	0.0315876	0.139336	0.167307	0.243067	0.203488	0.272275	0.0848781	0.193843	0.0965852	0.0331556	0.157379	0.375647	0.131408	0.221668	0.172716	0.0944944	0.206089	0.179319	0.294633	0.0595597	0.0712324	0.363111	0.0291575	0.138628	0.122554	0.05684	0.0678167	0.0117111	0.103044	0.0764828	0.0469931	0.06845	0.188596	0.0976057	0.104544	0.0651382	0.114942	0.0848781	0.192207	0.0945208	0.131408	0.0944944	0.0590681	0.0712324	0.363111	0.0291575	0.0297067
2003-03-02	0.193961	0.113867	0.0315876	0.139336	0.167307	0.243067	0.203488	0.272275	0.0848781	0.193843	0.0965852	0.0331556	0.157379	0.375647	0.131408	0.221668	0.172716	0.0944944	0.206089	0.179319	0.294633	0.0595597	0.0712324	0.363111	0.0291575	0.138628	0.122554	0.05684	0.0678167	0.0117111	0.103044	0.0764828	0.0469931	0.06845	0.188596	0.0976057	0.104544	0.0651382	0.114942	0.0848781	0.192207	0.0945208	0.131408	0.0944944	0.0590681	0.0712324	0.363111	0.0291575	0.0297067
2003-03-03	0.193961	0.113867	0.0315876	0.139336	0.167307	0.243067	0.203488	0.272275	0.0848781	0.193843	0.0965852	0.0331556	0.157379	0.375647	0.131408	0.221668	0.172716	0.0944944	0.206089	0.179319	0.294633	0.0595597	0.0712324	0.363111	0.0291575	0.138628	0.122554	0.05684	0.0678167	0.0117111	0.103044	0.0764828	0.0469931	0.06845	0.188596	0.0976057	0.104544	0.0651382	0.114942	0.0848781	0.192207	0.0945208	0.131408	0.0944944	0.0590681	0.0712324	0.363111	0.0291575	0.0297067
2003-03-04	0.193961	0.113867	0.0315876	0.139336	0.167307	0.243067	0.203488	0.272275	0.0848781	0.193843	0.0965852	0.0331556	0.157379	0.375647	0.131408	0.221668	0.172716	0.0944944	0.206089	0.179319	0.294633	0.0595597	0.0712324	0.363111	0.0291575	0.138628	0.122554	0.05684	0.0678167	0.0117111	0.103044	0.0764828	0.0469931	0.06845	0.188596	0.0976057	0.104544	0.0651382	0.114942	0.0848781	0.192207	0.0945208	0.131408	0.0944944	0.0590681	0.0712324	0.363111	0.0291575	0.0297067
2003-03-05	0.193961	0.113867	0.0315876	0.139336	0.167307	0.243067	0.203488	0.272275	0.0848781	0.193843	0.0965852	0.0331556	0.157379	0.375647	0.131408	0.221668	0.172716	0.0944944	0.206089	0.179319	0.294633	0.0595597	0.0712324	0.363111	0.0291575	0.138628	0.122554	0.05684	0.0678167	0.0117111	0.103044	0.0764828	0.0469931	0.06845	0.188596	0.0976057	0.104544	0.0651382	0.114942	0.0848781	0.192207	0.0945208	0.131408	0.0944944	0.0590681	0.0712324	0.363111	0.0291575	0.0297067
2003-03-06	0.193961	0.113867	0.0315876	0.139336	0.167307	0.243067	0.203488	0.272275	0.0848781	0.193843	0.0965852	0.0331556	0.157379	0.375647	0.131408	0.221668	0.172716	0.0944944	0.206089	0.179319	0.294633	0.0595597	0.0712324	0.363111	0.0291575	0.138628	0.122554	0.05684	0.0678167	0.0117111	0.103044	0.0764828	0.0469931	0.06845	0.188596	0.0976057	0.104544	0.0651382	0.114942	0.0848781	0.192207	0.0945208	0.131408	0.0944944	0.0590681	0.0712324	0.363111	0.0291575	0.0297067
2003-03-07	0.193961	0.113867	0.0315876	0.139336	0.167307	0.243067	0.203488	0.272275	0.0848781	0.193843	0.0965852	0.0331556	0.157379	0.375647	0.131408	0.221668	0.172716	0.0944944	0.206089	0.179319	0.294633	0.0595597	0.0712324	0.363111	0.0291575	0.138628	0.122554	0.05684	0.0678167	0.0117111	0.103044	0.0764828	0.0469931	0.06845	0.188596	0.0976057	0.104544	0.0651382	0.114942	0.0848781	0.192207	0.0945208	0.131408	0.0944944	0.0590681	0.0712324	0.363111	0.0291575	0.0297067
2003-03-08	0.193961	0.113867	0.0315876	0.139336	0.167307	0.243067	0.203488	0.272275	0.0848781	0.193843	0.0965852	0.0331556	0.157379	0.375647	0.131408	0.221668	0.172716	0.0944944	0.206089	0.179319	0.294633	0.0595597	0.0712324	0.363111	0.0291575	0.138628	0.122554	0.05684	0.0678167	0.0117111	0.103044	0.0764828	0.0469931	0.06845	0.188596	0.0976057	0.104544	0.0651382	0.114942	0.0848781	0.192207	0.0945208	0.131408	0.0944944	0.0590681	0.0712324	0.363111	0.0291575	0.0297067
2003-03-09	0.193961	0.113867	0.0315876	0.139336	0.167307	0.243067	0.203488	0.272275	0.0848781	0.193843	0.0965852	0.0331556	0.157379	0.375647	0.131408	0.221668	0.172716	0.0944944	0.206089	0.179319	0.294633	0.0595597	0.0712324	0.363111	0.0291575	0.138628	0.122554	0.05684	0.0678167	0.0117111	0.103044	0.0764828	0.0469931	0.06845	0.188596	0.0976057	0.104544	0.0651382	0.114942	0.0848781	0.192207	0.0945208	0.131408	0.0944944	0.0590681	0.0712324	0.363111	0.0291575	0.0297067
2003-03-10	0.193961	0.113867	0.0315876	0.139336	0.167307	0.243067	0.203488	0.272275	0.0848781	0.193843	0.0965852	0.0331556	0.157379	0.375647	0.131408	0.221668	0.172716	0.0944944	0.206089	0.179319	0.294633	0.0595597	0.0712324	0.363111	0.0291575	0.138628	0.122554	0.05684	0.0678167	0.0117111	0.103044	0.0764828	0.0469931	0.06845	0.188596	0.0976057	0.104544	0.0651382	0.114942	0.0848781	0.192207	0.0945208	0.131408	0.0944944	0.0590681	0.0712324	0.363111	0.0291575	0.0297067
[truncated: 12 more columns]

## Sheet: Green leaf patch density cows
Patch density (patches/m2) time series for green leaf by land unit (cows)
Land unit ID	1	2	3	4	5	6	7	8	9	10	11	12	13	14	15	16	17	18	19	20	21	22	23	24	25	26	27	28	29	30	31	32	33	34	35	36	37	38	43	44	45	46	47	48	49	50	51	52	53
Vegetation type	1	2	3	4	5	6	7	8	9	10	11	12	13	14	15	16	17	18	19	20	21	22	23	24	25	26	27	28	29	30	31	32	33	34	35	36	37	38	4	9	10	11	15	18	22	23	24	25	28
Early flush	0	0	0	0	0	0	0	0	0	0	0	0	0	0	0	0	0	0	0	0	0	0	0	0	0	0	0	0	0	0	0	0	0	0	0	0	0	0	0	0	0	0	0	0	0	0	0	0	0
Burnt	0	0	0	0	0	0	0	0	0	0	0	1	0	0	0	0	0	0	0	0	0	0	0	0	0	0	0	0	0	0	0	0	0	0	0	0	0	0	1	1	1	1	1	1	1	1	1	1	1
% clay	10	4.8	4	6.4	8	8	5	15.5	12.7	9.7	8.5	31.3	19	16	12.7	13	18	17.1	10.4	16.2	15.7	16.8	20.4	30.7	26	11.2	16.8	37.2	13.3	30.7	6.7	26	40.3	41.5	22.5	35.1	40	16.5	6.4	12.7	9.7	8.5	12.7	17.1	16.8	20.4	30.7	26	37.2
2002-03-12	0.181109	0.103893	0.0226639	0.125605	0.161189	0.212133	0.159174	0.25574	0.0835387	0.186012	0.0928231	0.0327111	0.155312	0.344958	0.124503	0.183423	0.166532	0.0919763	0.19928	0.113237	0.252235	0.0575633	0.0708191	0.344444	0.0286884	0.132676	0.115257	0.05492	0.0653556	0.0111778	0.0460222	0.0763828	0.0436286	0.05815	0.173208	0.0863141	0.104344	0.060979	0.0176382	0.00656094	0.185099	0.0290825	0.12505	0.0919763	0.0575433	0.0708191	0.344444	0.0286884	0.0382933
2002-03-13	0.181109	0.103893	0.0226639	0.125605	0.161189	0.212133	0.159174	0.25574	0.0835387	0.186012	0.0928231	0.0327111	0.155312	0.344958	0.124503	0.183423	0.166532	0.0919763	0.19928	0.113237	0.252235	0.0575633	0.0708191	0.344444	0.0286884	0.132676	0.115257	0.05492	0.0653556	0.0111778	0.0460222	0.0763828	0.0436286	0.05815	0.173208	0.0863141	0.104344	0.060979	0.0176382	0.00656094	0.185099	0.0290825	0.12505	0.0919763	0.0575433	0.0708191	0.344444	0.0286884	0.0382933
2002-03-14	0.181109	0.103893	0.0226639	0.125605	0.161189	0.212133	0.159174	0.25574	0.0835387	0.186012	0.0928231	0.0327111	0.155312	0.344958	0.124503	0.183423	0.166532	0.0919763	0.19928	0.113237	0.252235	0.0575633	0.0708191	0.344444	0.0286884	0.132676	0.115257	0.05492	0.0653556	0.0111778	0.0460222	0.0763828	0.0436286	0.05815	0.173208	0.0863141	0.104344	0.060979	0.0176382	0.00656094	0.185099	0.0290825	0.12505	0.0919763	0.0575433	0.0708191	0.344444	0.0286884	0.0382933
2002-03-15	0.181109	0.103893	0.0226639	0.125605	0.161189	0.212133	0.159174	0.25574	0.0835387	0.186012	0.0928231	0.0327111	0.155312	0.344958	0.124503	0.183423	0.166532	0.0919763	0.19928	0.113237	0.252235	0.0575633	0.0708191	0.344444	0.0286884	0.132676	0.115257	0.05492	0.0653556	0.0111778	0.0460222	0.0763828	0.0436286	0.05815	0.173208	0.0863141	0.104344	0.060979	0.0176382	0.00656094	0.185099	0.0290825	0.12505	0.0919763	0.0575433	0.0708191	0.344444	0.0286884	0.0382933
2002-03-16	0.181109	0.103893	0.0226639	0.125605	0.161189	0.212133	0.159174	0.25574	0.0835387	0.186012	0.0928231	0.0327111	0.155312	0.344958	0.124503	0.183423	0.166532	0.0919763	0.19928	0.113237	0.252235	0.0575633	0.0679264	0.344444	0.0286884	0.132676	0.115257	0.05492	0.0653556	0.0111778	0.0460222	0.0763828	0.0436286	0.05815	0.173208	0.0863141	0.104344	0.060979	0.0176382	0.00656094	0.185099	0.0290825	0.12505	0.0919763	0.0575433	0.0708191	0.344444	0.0286884	0.0382933
2002-03-17	0.181109	0.103893	0.0226639	0.125605	0.161189	0.212133	0.159174	0.25574	0.0835387	0.186012	0.0928231	0.0327111	0.155312	0.344958	0.124503	0.183423	0.166532	0.0919763	0.19928	0.113237	0.252101	0.0575633	0.0679264	0.344444	0.0286884	0.132636	0.115257	0.05492	0.0653556	0.0111778	0.0460222	0.0763828	0.0436286	0.05815	0.173208	0.0863141	0.104344	0.060979	0.0176382	0.00656094	0.185099	0.0290825	0.12505	0.0919763	0.0575433	0.0708191	0.344444	0.0286884	0.0382933
2002-03-18	0.181109	0.103893	0.0226639	0.125605	0.161189	0.212133	0.159174	0.25574	0.0835387	0.186012	0.0928231	0.0327111	0.155312	0.344958	0.124503	0.183423	0.166532	0.0919763	0.19928	0.113237	0.252101	0.0575633	0.0679264	0.344444	0.0286884	0.132636	0.115257	0.05492	0.0653556	0.0111778	0.0460222	0.0763828	0.0436286	0.05815	0.173208	0.0863141	0.104344	0.060979	0.0176382	0.00656094	0.185099	0.0290825	0.12505	0.0919763	0.0575433	0.0708191	0.344444	0.0286884	0.0382933
2002-03-19	0.181109	0.103893	0.0226639	0.125605	0.161189	0.212133	0.159174	0.25574	0.0835387	0.186012	0.0928231	0.0327111	0.155312	0.344958	0.124503	0.183423	0.166532	0.0919763	0.19928	0.113237	0.252101	0.0575633	0.0679264	0.344444	0.0286884	0.132636	0.115257	0.05492	0.0653556	0.0111778	0.0460222	0.0763828	0.0436286	0.05815	0.173208	0.0863141	0.104344	0.060979	0.0176382	0.00656094	0.185099	0.0290825	0.12505	0.0919763	0.0575433	0.0708191	0.344444	0.0286884	0.0382933
2002-03-20	0.181109	0.103893	0.0226639	0.125605	0.161189	0.212133	0.159174	0.25574	0.0835387	0.186012	0.0928231	0.0327111	0.155312	0.344958	0.124503	0.183423	0.166532	0.0919763	0.19928	0.113237	0.252101	0.0575633	0.0679264	0.344444	0.0286884	0.132636	0.115257	0.05492	0.0653556	0.0111778	0.0460222	0.0763828	0.0436286	0.05815	0.173208	0.0863141	0.104344	0.060979	0.0176382	0.00656094	0.185099	0.0290825	0.12505	0.0919763	0.0575433	0.0708191	0.344444	0.0286884	0.0382933
2002-03-21	0.181109	0.103893	0.0226639	0.125605	0.161189	0.212133	0.159174	0.25574	0.0835387	0.186012	0.0928231	0.0327111	0.155312	0.318113	0.124503	0.107823	0.166532	0.0919763	0.19928	0.113237	0.252101	0.0575633	0.0679264	0.344444	0.0286884	0.132636	0.114773	0.05492	0.0653556	0.0111778	0.0460222	0.0763828	0.0436286	0.05815	0.173208	0.0863141	0.104344	0.060979	0.0176382	0.00656094	0.185099	0.0290825	0.12505	0.0919763	0.0575433	0.0708191	0.344444	0.0286884	0.0382933
2002-03-22	0.180927	0.103893	0.0226639	0.125605	0.161189	0.212133	0.159174	0.25574	0.0835387	0.186012	0.0928231	0.0327111	0.155312	0.318039	0.124503	0.107823	0.166532	0.0919763	0.19928	0.113237	0.252101	0.0575633	0.0679264	0.344444	0.0286884	0.132636	0.114773	0.05492	0.0653556	0.0111778	0.0460222	0.0763828	0.0436286	0.05815	0.173031	0.0863141	0.104344	0.060979	0.0176382	0.00656094	0.185099	0.0290825	0.12505	0.0919763	0.0575433	0.0708191	0.344444	0.0286884	0.0382933
2002-03-23	0.180927	0.103893	0.0226639	0.125605	0.161189	0.212133	0.159174	0.25574	0.0835387	0.186012	0.0928231	0.0327111	0.155312	0.318039	0.124503	0.107823	0.166532	0.0919763	0.19928	0.105334	0.252101	0.0575633	0.0600321	0.344444	0.0286884	0.132636	0.114773	0.05492	0.0653556	0.0111778	0.0460222	0.0763828	0.0436286	0.05815	0.173031	0.0863141	0.104344	0.0592457	0.0176382	0.00656094	0.185099	0.0290825	0.12505	0.0919763	0.0575433	0.0708191	0.344444	0.0286884	0.0382933
2002-03-24	0.180927	0.103893	0.0226639	0.125605	0.161189	0.212133	0.159174	0.25574	0.0835387	0.186012	0.0928231	0.0327111	0.155312	0.318039	0.124503	0.107823	0.166532	0.0919763	0.19928	0.105334	0.252101	0.0575633	0.0600321	0.344444	0.0286884	0.132636	0.114773	0.05492	0.0653556	0.0111778	0.0460222	0.0763828	0.0436286	0.05815	0.173031	0.0863141	0.104344	0.0592457	0.0176382	0.00656094	0.185099	0.0290825	0.12505	0.0919763	0.0575433	0.0708191	0.344444	0.0286884	0.0382933
2002-03-25	0.180927	0.103893	0.0226639	0.125605	0.161189	0.212133	0.159174	0.25574	0.0835387	0.186012	0.0928231	0.0327111	0.155312	0.318039	0.124503	0.107823	0.166532	0.0919763	0.19928	0.105334	0.252101	0.0575633	0.0600321	0.344444	0.0286884	0.132636	0.114773	0.05492	0.0653556	0.0111778	0.0460222	0.0763828	0.0436286	0.05815	0.173031	0.0863141	0.104344	0.0592457	0.0176382	0.00656094	0.185099	0.0290825	0.12505	0.0919763	0.0575433	0.0708191	0.344444	0.0286884	0.0382933
2002-03-26	0.180927	0.103893	0.0226639	0.125605	0.161189	0.212133	0.159174	0.25574	0.0835387	0.186012	0.0928231	0.0327111	0.155312	0.318039	0.124503	0.107823	0.166532	0.0919763	0.19928	0.105334	0.252101	0.0575633	0.0600321	0.344444	0.0286884	0.132636	0.114278	0.05492	0.0653556	0.0111778	0.0460222	0.0763828	0.0436286	0.05815	0.173031	0.0863141	0.104344	0.0592457	0.0176382	0.00656094	0.185099	0.0290825	0.12505	0.0919763	0.0575433	0.0708191	0.344444	0.0286884	0.0382933
2002-03-27	0.178427	0.103893	0.0226639	0.125605	0.161189	0.212133	0.159174	0.25574	0.0835387	0.186012	0.0928231	0.0327111	0.155312	0.318039	0.124503	0.107823	0.166532	0.0919763	0.19928	0.105334	0.252101	0.0575633	0.0600321	0.344444	0.0286884	0.132636	0.114278	0.05492	0.0653556	0.0111778	0.0460222	0.0763828	0.0436286	0.05815	0.173031	0.0652844	0.104344	0.0592457	0.0176382	0.00656094	0.185099	0.0290825	0.12505	0.0919763	0.0575433	0.0708191	0.344444	0.0286884	0.0382933
2002-03-28	0.178427	0.103893	0.0226639	0.125605	0.161189	0.212133	0.159174	0.25574	0.0835387	0.186012	0.0830231	0.0327111	0.155312	0.318039	0.124503	0.107823	0.166532	0.0919763	0.19928	0.105334	0.252101	0.0575633	0.0600321	0.344444	0.0286884	0.132636	0.114278	0.05492	0.0653556	0.0111778	0.0460222	0.0763828	0.0436286	0.05815	0.173031	0.0652844	0.104344	0.0592457	0.0176382	0.00656094	0.185099	0.0290825	0.12505	0.0919763	0.0575433	0.0708191	0.344444	0.0286884	0.0382933
2002-03-29	0.107327	0.103893	0.0226639	0.125605	0.161189	0.212133	0.159174	0.25574	0.0835387	0.186012	0.0830231	0.0327111	0.155312	0.318039	0.124503	0.106756	0.166532	0.0919763	0.19928	0.104643	0.252101	0.0575633	0.0600321	0.344444	0.0286884	0.132636	0.114278	0.05492	0.0653556	0.0111778	0.0460222	0.0763828	0.0436286	0.05815	0.172754	0.0652844	0.104344	0.058969	0.0176382	0.00656094	0.185099	0.0290825	0.12505	0.0919763	0.0575433	0.0708191	0.344444	0.0286884	0.0382933
2002-03-30	0.107327	0.103893	0.0226639	0.125605	0.161189	0.212133	0.159174	0.25574	0.0835387	0.186012	0.0830231	0.0327111	0.155312	0.318039	0.124503	0.106756	0.166532	0.0919763	0.19928	0.104643	0.252101	0.0575633	0.0600321	0.344444	0.0286884	0.132636	0.114278	0.05492	0.0653556	0.0111778	0.0460222	0.0763828	0.0436286	0.05815	0.172754	0.0652844	0.104344	0.058969	0.0176382	0.00656094	0.185099	0.0290825	0.12505	0.0919763	0.0575433	0.0708191	0.344444	0.0286884	0.0382933
2002-03-31	0.107327	0.103893	0.0226639	0.125605	0.161189	0.212133	0.159174	0.25574	0.0835387	0.186012	0.0593231	0.0327111	0.155312	0.318039	0.124503	0.106756	0.166532	0.0919763	0.19928	0.104643	0.252101	0.0575633	0.0600321	0.344444	0.0286884	0.132636	0.114278	0.05492	0.0653556	0.0111778	0.0460222	0.0763828	0.0436286	0.05815	0.172754	0.0652844	0.104344	0.058969	0.0176382	0.00656094	0.185099	0.0290825	0.12505	0.0919763	0.0575433	0.0708191	0.344444	0.0286884	0.0382933
2002-04-01	0.107327	0.103893	0.0226639	0.125605	0.161189	0.212133	0.159174	0.25564	0.0835387	0.186012	0.0593231	0.0327111	0.154913	0.318039	0.124503	0.106756	0.166532	0.0919763	0.19928	0.104643	0.252101	0.0575633	0.058223	0.344444	0.0286884	0.132636	0.114278	0.05492	0.0653556	0.0111778	0.0460222	0.0763828	0.0436286	0.05815	0.172754	0.0652844	0.104344	0.0564357	0.0176382	0.00656094	0.185099	0.0290825	0.12505	0.0919763	0.0575433	0.0708191	0.344444	0.0286884	0.0382933
2002-04-02	0.107327	0.103893	0.0226639	0.125605	0.161189	0.212133	0.159174	0.25564	0.0835387	0.186012	0.0593231	0.0327111	0.154913	0.318039	0.124503	0.106756	0.166532	0.0919763	0.19928	0.104643	0.252101	0.0575633	0.058223	0.344444	0.0286884	0.132636	0.114278	0.05492	0.0653556	0.0111778	0.0460222	0.0763828	0.0436286	0.05815	0.172754	0.0652844	0.104344	0.0564357	0.0176382	0.00656094	0.185099	0.0290825	0.12505	0.0919763	0.0575433	0.0708191	0.344444	0.0286884	0.0382933
2002-04-03	0.107327	0.103893	0.0226639	0.125605	0.161189	0.212133	0.159174	0.25564	0.0835387	0.186012	0.0593231	0.0327111	0.154913	0.318039	0.124503	0.106756	0.166532	0.0919763	0.19928	0.104643	0.252101	0.0575633	0.058223	0.344444	0.0286884	0.132636	0.114278	0.05492	0.0653556	0.0111778	0.0460222	0.0763828	0.0436286	0.05815	0.172754	0.0652844	0.104344	0.0564357	0.0176382	0.00656094	0.185099	0.0290825	0.12505	0.0919763	0.0575433	0.0708191	0.344444	0.0286884	0.0382933
2002-04-04	0.107327	0.103893	0.0226639	0.125605	0.161189	0.212133	0.159174	0.25564	0.0835387	0.186012	0.0593231	0.0327111	0.154913	0.318039	0.124503	0.106756	0.166532	0.0919763	0.19928	0.104643	0.252101	0.0575633	0.058223	0.344444	0.0286884	0.132636	0.114278	0.05492	0.0653556	0.0111778	0.0460222	0.0763828	0.0436286	0.05815	0.172754	0.0652844	0.104344	0.0564357	0.0176382	0.00656094	0.185099	0.0290825	0.12505	0.0919763	0.0575433	0.0708191	0.344444	0.0286884	0.0382933
2002-04-05	0.107327	0.103893	0.0226639	0.125605	0.161189	0.212133	0.159174	0.25564	0.0835387	0.186012	0.0593231	0.0327111	0.154913	0.318039	0.124503	0.106756	0.166532	0.0919763	0.19928	0.104643	0.252101	0.0575633	0.058223	0.344444	0.0286884	0.132636	0.114278	0.05492	0.0653556	0.0111778	0.0460222	0.0763828	0.0436286	0.05815	0.172754	0.0652844	0.104344	0.0564357	0.0176382	0.00656094	0.185099	0.0290825	0.12505	0.0919763	0.0575433	0.0708191	0.344444	0.0286884	0.0382933
2002-04-06	0.107327	0.103893	0.0226639	0.125605	0.161189	0.212133	0.159174	0.25564	0.0835387	0.186012	0.0593231	0.0327111	0.154913	0.318039	0.124503	0.106756	0.166532	0.0919763	0.19928	0.104643	0.252101	0.0575633	0.058223	0.344444	0.0286884	0.132636	0.114278	0.05492	0.0653556	0.0111778	0.0460222	0.0763828	0.0436286	0.05815	0.172754	0.0652844	0.104344	0.0564357	0.0176382	0.00656094	0.185099	0.0290825	0.12505	0.0919763	0.0575433	0.0708191	0.344444	0.0286884	0.0382933
2002-04-07	0.107327	0.103893	0.0226639	0.125605	0.161189	0.212133	0.159174	0.25564	0.0835387	0.186012	0.0593231	0.0327111	0.154913	0.318039	0.124503	0.106756	0.166532	0.0919763	0.19928	0.104643	0.252101	0.0575633	0.058223	0.344444	0.0286884	0.132636	0.114278	0.05492	0.0653556	0.0111778	0.0460222	0.0763828	0.0452286	0.05815	0.172754	0.0652844	0.104344	0.0564357	0.0176382	0.00656094	0.185099	0.0290825	0.12505	0.0919763	0.0575433	0.0708191	0.344444	0.0286884	0.0382933
2002-04-08	0.107327	0.103893	0.0226639	0.125605	0.161189	0.212133	0.159174	0.25564	0.0835387	0.186012	0.0593231	0.0327111	0.154913	0.318039	0.124503	0.106756	0.166532	0.0919763	0.19928	0.104643	0.252101	0.0575633	0.058223	0.344444	0.0286884	0.132636	0.114278	0.05492	0.0653556	0.0111778	0.0460222	0.0763828	0.0452286	0.05815	0.172754	0.0661956	0.104344	0.0564357	0.0176382	0.00656094	0.185099	0.0290825	0.12505	0.0919763	0.0575433	0.0708191	0.344444	0.0286884	0.0382933
2002-04-09	0.102527	0.103893	0.0226639	0.125605	0.161189	0.212133	0.159174	0.25564	0.0835387	0.186012	0.0593231	0.0327111	0.154913	0.318039	0.124503	0.106756	0.166532	0.0919763	0.19928	0.104643	0.252101	0.0575633	0.058223	0.344444	0.0286884	0.132636	0.114278	0.05492	0.0653556	0.0111778	0.0460222	0.0763828	0.0452286	0.05815	0.172754	0.0661956	0.104344	0.0564357	0.0176382	0.00656094	0.185099	0.0300825	0.12505	0.0919763	0.0575433	0.0708191	0.344444	0.0286884	0.0382933
2002-04-10	0.102527	0.103893	0.0214925	0.125605	0.161189	0.212133	0.159174	0.25564	0.0835387	0.186012	0.0593231	0.0327111	0.154913	0.318039	0.124503	0.106756	0.166532	0.0919763	0.19928	0.104643	0.252101	0.0575633	0.058223	0.344444	0.0286884	0.132636	0.114278	0.05492	0.0653556	0.0111778	0.0460222	0.0763828	0.0452286	0.05815	0.172754	0.0661956	0.104344	0.0564357	0.0176382	0.00656094	0.185099	0.0300825	0.12505	0.0919763	0.0575433	0.0708191	0.344444	0.0286884	0.0382933
2002-04-11	0.102527	0.103893	0.0214925	0.125605	0.161189	0.212133	0.159174	0.25564	0.0835387	0.185345	0.0593231	0.0327111	0.154913	0.318039	0.124503	0.106756	0.166532	0.0919763	0.19928	0.104643	0.252101	0.0575633	0.058223	0.344444	0.0286884	0.132636	0.114278	0.05492	0.0653556	0.0111778	0.0460222	0.0763828	0.0452286	0.05815	0.172754	0.0661956	0.104344	0.0564357	0.0176382	0.00656094	0.185099	0.0300825	0.12505	0.0919763	0.0575433	0.0708191	0.344444	0.0286884	0.0382933
2002-04-12	0.102527	0.103893	0.0214925	0.125605	0.161189	0.212133	0.159174	0.25564	0.0835387	0.185345	0.0593231	0.0327111	0.154913	0.290973	0.124503	0.106756	0.164532	0.0919763	0.19928	0.104643	0.252101	0.0575633	0.058223	0.344444	0.0286884	0.132636	0.114278	0.05492	0.0653556	0.0111778	0.0460222	0.0763828	0.0452286	0.05815	0.172754	0.0661956	0.104344	0.0564357	0.0176382	0.00656094	0.185099	0.0300825	0.12505	0.0919763	0.0575433	0.0708191	0.344444	0.0286884	0.0382933
2002-04-13	0.102527	0.103893	0.0214925	0.125605	0.161189	0.212133	0.159174	0.25564	0.0835387	0.185345	0.0593231	0.0327111	0.144912	0.290973	0.124503	0.106756	0.164532	0.0919763	0.19928	0.104643	0.252101	0.0575633	0.058223	0.344444	0.0286884	0.132636	0.114278	0.05476	0.0653556	0.0111778	0.0460222	0.0763828	0.0452286	0.05815	0.172754	0.0661956	0.104344	0.0564357	0.0176382	0.00656094	0.185099	0.0300825	0.12505	0.0919763	0.0575433	0.0708191	0.344444	0.0286884	0.0382933
2002-04-14	0.102527	0.103893	0.0214925	0.125605	0.161189	0.212133	0.159174	0.25564	0.0835387	0.185345	0.0593231	0.0327111	0.144912	0.288735	0.124503	0.106756	0.164283	0.0919763	0.19928	0.104643	0.252101	0.0575633	0.058223	0.344444	0.0286884	0.132636	0.114278	0.05476	0.0653556	0.0111778	0.0460222	0.0763828	0.0452286	0.05815	0.172754	0.0661956	0.104344	0.0564357	0.0176382	0.00656094	0.185099	0.0300825	0.12505	0.0919763	0.0575433	0.0708191	0.344444	0.0286884	0.0382933
2002-04-15	0.102527	0.103893	0.0214925	0.125605	0.161189	0.212133	0.159174	0.25564	0.0835387	0.185345	0.0593231	0.0327111	0.144912	0.288735	0.124503	0.106756	0.164283	0.0919763	0.19928	0.104643	0.252101	0.0575633	0.058223	0.344444	0.0286884	0.132636	0.114278	0.05476	0.0653556	0.0111778	0.0460222	0.0763828	0.0452286	0.05815	0.172754	0.0661956	0.104344	0.0564357	0.0176382	0.00656094	0.185099	0.0300825	0.12505	0.0919763	0.0575433	0.0708191	0.344444	0.0286884	0.0382933
2002-04-16	0.102527	0.103893	0.0214925	0.125605	0.161189	0.212133	0.159174	0.25564	0.0835387	0.185345	0.0593231	0.0327111	0.144912	0.288735	0.124503	0.106756	0.164283	0.0919763	0.19928	0.152171	0.252101	0.0575633	0.058223	0.344444	0.0286884	0.132636	0.114278	0.05476	0.0653556	0.0111778	0.0460222	0.0763828	0.0452286	0.05815	0.172754	0.0661956	0.104344	0.0564357	0.0176382	0.00656094	0.185099	0.0300825	0.12505	0.0919763	0.0575433	0.0708191	0.344444	0.0286884	0.0382933
2002-04-17	0.102527	0.103893	0.0214925	0.125605	0.161189	0.212133	0.159174	0.25564	0.0835387	0.185345	0.0593231	0.0327111	0.144912	0.288735	0.124503	0.106756	0.164283	0.0919763	0.19928	0.152171	0.252101	0.0575633	0.058223	0.344444	0.0286884	0.132636	0.114278	0.05476	0.0653556	0.0111778	0.0460222	0.0763828	0.0452286	0.05815	0.172754	0.0661956	0.104344	0.0564357	0.0176382	0.00656094	0.185099	0.0300825	0.12505	0.0919763	0.0575433	0.0708191	0.344444	0.0286884	0.0382933
2002-04-18	0.102527	0.103893	0.0214925	0.125605	0.161189	0.212133	0.159174	0.25564	0.0835387	0.185345	0.059126	0.0327111	0.144912	0.288735	0.124503	0.106756	0.164283	0.0919763	0.19928	0.152171	0.252101	0.0575633	0.058223	0.344444	0.0286884	0.132636	0.114278	0.05476	0.0653556	0.0111778	0.0460222	0.0763828	0.0452286	0.05815	0.116354	0.0661956	0.104344	0.0564357	0.0176382	0.00656094	0.185099	0.0300825	0.12505	0.0919763	0.0575433	0.0708191	0.344444	0.0286884	0.0382933
2002-04-19	0.102527	0.103893	0.0214925	0.125605	0.161189	0.212133	0.159174	0.25564	0.0835387	0.185345	0.059126	0.0327111	0.144912	0.288735	0.124503	0.106756	0.164283	0.0919763	0.19928	0.152171	0.252101	0.0575633	0.058223	0.344444	0.0286884	0.132636	0.114278	0.05476	0.0653556	0.0111778	0.0460222	0.0763828	0.0452286	0.05815	0.112754	0.0661956	0.104344	0.0564357	0.0176382	0.00656094	0.185099	0.0300825	0.12505	0.0919763	0.0575433	0.0708191	0.344444	0.0286884	0.0382933
2002-04-20	0.102527	0.103893	0.0214925	0.125605	0.161189	0.212133	0.159174	0.25564	0.0835387	0.185345	0.059126	0.0327111	0.144912	0.28629	0.124503	0.0543564	0.164283	0.0919763	0.19928	0.152171	0.252101	0.0575633	0.058223	0.344444	0.0286884	0.132636	0.114278	0.05476	0.0653556	0.0111778	0.0460222	0.0763828	0.0452286	0.05815	0.112754	0.0661956	0.104344	0.0564357	0.0176382	0.00656094	0.185099	0.0300825	0.12505	0.0919763	0.0575433	0.0708191	0.344444	0.0286884	0.0382933
2002-04-21	0.102527	0.103893	0.0214925	0.125605	0.161189	0.212133	0.159174	0.25564	0.0835387	0.185345	0.059126	0.0327111	0.144912	0.28629	0.124503	0.0543564	0.164283	0.0919763	0.19928	0.152171	0.252101	0.0575633	0.058223	0.344444	0.0286884	0.132636	0.114278	0.05476	0.0653556	0.0111778	0.0460222	0.0763828	0.0452286	0.05815	0.112754	0.0661956	0.104344	0.0564357	0.0176382	0.00656094	0.182032	0.0300825	0.12505	0.0919763	0.0575433	0.0708191	0.344444	0.0286884	0.0382933
2002-04-22	0.102527	0.103893	0.0214925	0.125605	0.161189	0.212133	0.159174	0.25564	0.0835387	0.185345	0.059126	0.0327111	0.144912	0.28629	0.124503	0.0543564	0.164283	0.0919763	0.19928	0.152171	0.252101	0.0575633	0.058223	0.344444	0.0286884	0.132636	0.114278	0.05476	0.0653556	0.0111778	0.0460222	0.0763828	0.0452286	0.05815	0.112754	0.0661956	0.104344	0.0564357	0.0176382	0.00656094	0.182032	0.0300825	0.12505	0.0919763	0.0575433	0.0708191	0.344444	0.0286884	0.0382933
2002-04-23	0.102527	0.103893	0.0214925	0.125605	0.161189	0.212133	0.159174	0.25564	0.0835387	0.185345	0.059126	0.0327111	0.144088	0.28629	0.124503	0.0543564	0.164283	0.0919763	0.19928	0.152171	0.251701	0.0575633	0.058223	0.344444	0.0286884	0.132636	0.114278	0.05476	0.0653556	0.0111778	0.0460222	0.0763828	0.0452286	0.05815	0.112754	0.0661956	0.104344	0.0564357	0.0176382	0.00656094	0.182032	0.0300825	0.12505	0.0919763	0.0575433	0.0708191	0.344444	0.0286884	0.0382933
2002-04-24	0.102527	0.103893	0.0214925	0.125525	0.161189	0.212133	0.159149	0.25564	0.0835387	0.185345	0.059126	0.0327111	0.144088	0.279135	0.124503	0.0543564	0.164283	0.0919763	0.19928	0.152171	0.251701	0.0575633	0.058223	0.344444	0.0271027	0.132636	0.114278	0.05476	0.0653556	0.0111778	0.0460222	0.0763828	0.0452286	0.05815	0.112754	0.0661956	0.104344	0.0564357	0.0176382	0.00656094	0.182032	0.0300825	0.12505	0.0919763	0.0575433	0.0708191	0.344444	0.0286884	0.0382933
2002-04-25	0.102527	0.103893	0.0214925	0.125525	0.161189	0.212133	0.159149	0.25564	0.0835387	0.185345	0.059126	0.0327111	0.144088	0.279135	0.124503	0.0541564	0.164283	0.0919763	0.19928	0.152171	0.251701	0.0575633	0.058223	0.344444	0.0271027	0.132636	0.114278	0.05476	0.0653556	0.0111778	0.0460222	0.0763828	0.0452286	0.05815	0.112754	0.0661956	0.104344	0.0564357	0.0176382	0.00656094	0.182032	0.0300825	0.12505	0.0919763	0.0575433	0.0708191	0.344444	0.0286884	0.0382933
2002-04-26	0.102527	0.103893	0.0214925	0.125525	0.159415	0.212133	0.158101	0.25564	0.0835387	0.185345	0.059126	0.0327111	0.144088	0.279135	0.124503	0.0541564	0.164283	0.0919763	0.19928	0.152171	0.251701	0.0575633	0.058223	0.344444	0.0271027	0.132636	0.114278	0.05476	0.0653556	0.0111778	0.0460222	0.0763828	0.0452286	0.05815	0.112754	0.0661956	0.104344	0.0564357	0.0175582	0.00656094	0.182032	0.0300825	0.12505	0.0919763	0.0575433	0.0708191	0.344444	0.0286884	0.0382933
2002-04-27	0.102527	0.103893	0.0214925	0.125525	0.159415	0.210933	0.158101	0.25564	0.0835387	0.185345	0.059126	0.0327111	0.144088	0.279135	0.124503	0.0541564	0.164283	0.0919763	0.19928	0.152171	0.251701	0.0575633	0.058223	0.344444	0.0271027	0.132636	0.114278	0.05476	0.0653556	0.0111778	0.0460222	0.0763828	0.0452286	0.05815	0.112754	0.0661956	0.104344	0.0564357	0.0175582	0.00656094	0.182032	0.0300825	0.12505	0.0919763	0.0575433	0.0708191	0.344444	0.0286884	0.0382933
2002-04-28	0.102527	0.103893	0.0214925	0.125525	0.159415	0.210933	0.158101	0.25564	0.0835387	0.185345	0.059126	0.0327111	0.144088	0.279135	0.124503	0.0460897	0.164283	0.0919763	0.19928	0.152171	0.251701	0.0575633	0.058223	0.344444	0.0271027	0.132636	0.114278	0.05476	0.0653556	0.0111778	0.0460222	0.0763828	0.0452286	0.05815	0.112754	0.0661956	0.104344	0.0564357	0.0175582	0.00656094	0.182032	0.0300825	0.12505	0.0919763	0.0575433	0.0708191	0.344444	0.0286884	0.0382933
2002-04-29	0.102527	0.103893	0.0214925	0.125525	0.159415	0.210933	0.158101	0.25564	0.0835387	0.185345	0.058626	0.0327111	0.144088	0.279135	0.124503	0.0460897	0.164283	0.0919763	0.19928	0.152171	0.251701	0.0575633	0.058223	0.344444	0.0271027	0.132636	0.114278	0.05476	0.0653556	0.0111778	0.0460222	0.0763828	0.0452286	0.05815	0.112754	0.0661956	0.104344	0.0564357	0.0175582	0.00656094	0.182032	0.0300825	0.12505	0.0919763	0.0575433	0.0708191	0.344444	0.0286884	0.0382933
2002-04-30	0.102527	0.103893	0.0214925	0.125525	0.159415	0.210933	0.158101	0.25564	0.0835387	0.185345	0.058626	0.0327111	0.144088	0.279135	0.124503	0.0460897	0.164283	0.0919763	0.19928	0.152171	0.251701	0.0575633	0.058223	0.344444	0.0271027	0.132636	0.114278	0.05476	0.0653556	0.0111778	0.0460222	0.0763828	0.0452286	0.05815	0.112754	0.0661956	0.104344	0.0564357	0.0175582	0.00656094	0.182032	0.0300825	0.12505	0.0919763	0.0575433	0.0708191	0.344444	0.0286884	0.0382933
2002-05-01	0.102527	0.103413	0.0214925	0.125525	0.159415	0.210933	0.158101	0.25564	0.0835387	0.185345	0.058626	0.0327111	0.144088	0.256468	0.124503	0.0460897	0.15935	0.0919763	0.19928	0.152171	0.251701	0.0575633	0.058223	0.344444	0.0271027	0.132636	0.111185	0.05476	0.0653556	0.0111778	0.0460222	0.0763828	0.0452286	0.05815	0.112754	0.0661956	0.104344	0.0564357	0.0175582	0.00656094	0.182032	0.0300825	0.12505	0.0919763	0.0575433	0.0708191	0.344444	0.0286884	0.0382933
2002-05-02	0.102527	0.103413	0.0214925	0.125525	0.159415	0.210933	0.158101	0.25404	0.0835387	0.185345	0.058626	0.0327111	0.144088	0.256468	0.124503	0.0460897	0.15935	0.0919763	0.19928	0.152171	0.249511	0.0575633	0.058223	0.344444	0.0271027	0.132636	0.111185	0.05476	0.0653556	0.0111778	0.0460222	0.0712464	0.0452286	0.05815	0.104354	0.0661956	0.104344	0.0564357	0.0175582	0.00656094	0.182032	0.0300825	0.12505	0.0919763	0.0575433	0.0708191	0.344444	0.0286884	0.0382933
2002-05-03	0.102527	0.103413	0.0214925	0.125525	0.159415	0.210933	0.158101	0.25404	0.0835387	0.185345	0.058626	0.0327111	0.144088	0.25557	0.124503	0.0460897	0.159195	0.0919763	0.19928	0.152171	0.239777	0.0575633	0.058223	0.344444	0.0271027	0.132636	0.111185	0.05476	0.0653556	0.0111778	0.0460222	0.0712464	0.0452286	0.05815	0.0953538	0.0661956	0.104344	0.0564357	0.0175582	0.00656094	0.182032	0.0300825	0.0934499	0.0919763	0.0575433	0.0708191	0.344444	0.0286884	0.0382933
2002-05-04	0.102527	0.103413	0.0214925	0.125525	0.159415	0.210933	0.158101	0.25404	0.0835387	0.185345	0.058626	0.0327111	0.143288	0.25557	0.124503	0.0460897	0.159195	0.0919763	0.19928	0.152171	0.239777	0.0575633	0.058223	0.344444	0.0271027	0.132636	0.111185	0.05476	0.0653556	0.0111778	0.0460222	0.0712464	0.0452286	0.05815	0.0953538	0.0661956	0.104344	0.0564357	0.0175582	0.00656094	0.182032	0.0300825	0.0934499	0.0919763	0.0575433	0.0708191	0.344444	0.0286884	0.0382933
2002-05-05	0.102527	0.103413	0.0214925	0.125525	0.159415	0.210933	0.158101	0.25404	0.0835387	0.185345	0.058626	0.0327111	0.143288	0.25557	0.124503	0.0460897	0.159195	0.0919763	0.19928	0.151448	0.239777	0.0575433	0.058223	0.344444	0.0271027	0.132636	0.111169	0.05476	0.0653556	0.0111778	0.0460222	0.0712464	0.0452286	0.05815	0.0935538	0.0661956	0.104344	0.0564357	0.0175582	0.00656094	0.182032	0.0573825	0.0934499	0.0919763	0.0575433	0.0708191	0.344444	0.0286884	0.0382933
2002-05-06	0.0891273	0.103413	0.0214925	0.125525	0.159415	0.210933	0.158101	0.25404	0.0835387	0.185345	0.058626	0.0327111	0.143288	0.25557	0.124503	0.0460897	0.159195	0.0919763	0.19928	0.151448	0.234351	0.0575433	0.058223	0.344444	0.0271027	0.132636	0.111169	0.05476	0.0653556	0.0111778	0.0460222	0.0712464	0.0452286	0.05815	0.0935538	0.0661956	0.104344	0.0564357	0.0175582	0.00656094	0.181899	0.0573825	0.0934499	0.0919763	0.0575433	0.0708191	0.344444	0.0286884	0.0382933
2002-05-07	0.0891273	0.103413	0.0214925	0.125525	0.159415	0.210933	0.153924	0.25404	0.0835387	0.185345	0.058626	0.0327111	0.133687	0.25557	0.124503	0.0456923	0.159195	0.0919763	0.19928	0.151448	0.234351	0.0575433	0.058223	0.344444	0.0271027	0.132636	0.102992	0.05476	0.0652889	0.0111778	0.0460222	0.0712464	0.0452286	0.05815	0.0935538	0.0661956	0.104344	0.0564357	0.0175582	0.00656094	0.181899	0.0573825	0.0934499	0.0919763	0.0575433	0.0708191	0.344444	0.0286884	0.0382933
2002-05-08	0.0891273	0.103413	0.0214925	0.125525	0.159415	0.210933	0.153924	0.25404	0.0835387	0.185345	0.058626	0.0327111	0.133687	0.25557	0.124503	0.0456923	0.159195	0.0919763	0.19928	0.151448	0.234351	0.0575433	0.058223	0.344444	0.0271027	0.127116	0.102992	0.05476	0.0652889	0.0111778	0.0460222	0.0712464	0.0452286	0.05815	0.0935538	0.0661956	0.104344	0.0564357	0.0175582	0.00656094	0.181899	0.0573825	0.0934499	0.0919763	0.0575433	0.0708191	0.344444	0.0286884	0.0382933
2002-05-09	0.0891273	0.103413	0.0214925	0.125525	0.159415	0.210933	0.153924	0.25404	0.0835387	0.185345	0.058626	0.0327111	0.133687	0.25557	0.124321	0.0400923	0.159195	0.0919763	0.19928	0.151448	0.234351	0.0575433	0.058223	0.344444	0.0271027	0.127116	0.102992	0.05476	0.0652889	0.0111778	0.0460222	0.0712464	0.0452286	0.05815	0.0935538	0.0661956	0.104344	0.0564357	0.0175582	0.00656094	0.181899	0.0573825	0.0932681	0.0919763	0.0575433	0.0708191	0.344444	0.0286884	0.0382933
2002-05-10	0.0891273	0.103413	0.0214925	0.125525	0.159415	0.210933	0.153924	0.25334	0.0835387	0.185345	0.058626	0.0327111	0.133488	0.25557	0.124321	0.0400923	0.159195	0.0919763	0.19928	0.151448	0.231551	0.0575433	0.058223	0.344444	0.0271027	0.127116	0.102992	0.05476	0.0652889	0.0111778	0.0460222	0.0712464	0.0452286	0.05815	0.0935538	0.0661956	0.104344	0.0564357	0.0175582	0.00656094	0.181899	0.0573825	0.0932681	0.0919763	0.0575433	0.0708191	0.344444	0.0286884	0.0382933
2002-05-11	0.0891273	0.103413	0.0214925	0.125525	0.159415	0.210933	0.153924	0.25334	0.0835387	0.185345	0.058626	0.0327111	0.133488	0.25557	0.124321	0.0368923	0.159195	0.0919763	0.19928	0.151	0.231551	0.0575433	0.058223	0.344444	0.0271027	0.127116	0.102992	0.05476	0.0652889	0.0111778	0.0460222	0.0712464	0.0452286	0.05815	0.0935538	0.0661956	0.103678	0.0564357	0.0175582	0.00656094	0.181899	0.0573825	0.0932681	0.0919763	0.0575433	0.0708191	0.344444	0.0286884	0.0382933
2002-05-12	0.0891273	0.103413	0.0214925	0.125525	0.159415	0.210933	0.153924	0.25334	0.0835387	0.185345	0.058626	0.0327111	0.133488	0.25557	0.124321	0.0368923	0.159195	0.0919763	0.19928	0.151	0.231551	0.0575433	0.0572703	0.344444	0.0271027	0.127116	0.102992	0.05476	0.0652889	0.0111778	0.0460222	0.0712464	0.0452286	0.05815	0.0935538	0.0661956	0.103678	0.0564357	0.0175582	0.00656094	0.181899	0.0573825	0.0906014	0.0919763	0.0575433	0.0708191	0.344444	0.0286884	0.0382933
2002-05-13	0.0891273	0.103413	0.0214925	0.125525	0.162882	0.144933	0.151074	0.25334	0.0835387	0.185345	0.058626	0.0327111	0.133488	0.25557	0.124321	0.0368923	0.159195	0.0919763	0.19928	0.151	0.231551	0.0575433	0.0572703	0.344444	0.0271027	0.127116	0.102992	0.05476	0.0652889	0.0111778	0.0460222	0.0712464	0.0452286	0.05815	0.0935538	0.0661956	0.103678	0.0564357	0.0175582	0.00656094	0.181899	0.0573825	0.0906014	0.0919763	0.0575113	0.0708191	0.344444	0.0286884	0.0382933
2002-05-14	0.0891273	0.103413	0.0214925	0.125525	0.162882	0.144933	0.151074	0.25334	0.0835387	0.185345	0.058626	0.0327111	0.131938	0.25557	0.124321	0.0368923	0.159195	0.0919763	0.193173	0.151	0.206416	0.0575433	0.0572703	0.344444	0.0271027	0.127116	0.102992	0.05476	0.0652889	0.0111778	0.0460222	0.0712464	0.0452286	0.05815	0.0935538	0.0661956	0.103678	0.0564357	0.0175582	0.00656094	0.181899	0.0573825	0.0906014	0.0919763	0.0575113	0.0708191	0.344444	0.0286884	0.0382933
2002-05-15	0.0791273	0.103413	0.0214925	0.125525	0.162882	0.144933	0.151074	0.25334	0.0835387	0.185345	0.058626	0.0327111	0.131938	0.254326	0.124321	0.0368923	0.159195	0.0919763	0.193173	0.151	0.206416	0.0575433	0.0572703	0.344444	0.0271027	0.127116	0.102992	0.05476	0.0652889	0.0111778	0.0460222	0.0712464	0.0452286	0.05815	0.0935538	0.0661956	0.103678	0.0564357	0.0175582	0.00656094	0.181899	0.0573825	0.0906014	0.0919763	0.0575113	0.0708191	0.344444	0.0286884	0.0382933
2002-05-16	0.0791273	0.103413	0.0214925	0.125525	0.162882	0.144933	0.150624	0.25334	0.0835387	0.185345	0.058626	0.0327111	0.131938	0.254326	0.124321	0.0368923	0.159195	0.0919763	0.193173	0.151	0.206416	0.0575433	0.0572703	0.344444	0.0271027	0.127116	0.102992	0.05476	0.0652889	0.0111778	0.0460222	0.0712464	0.0452286	0.05815	0.0935538	0.0661956	0.103678	0.0564357	0.0175582	0.00656094	0.178544	0.0573825	0.0906014	0.0919763	0.0575113	0.0708191	0.344444	0.0286884	0.0382933
2002-05-17	0.0791273	0.103413	0.0214925	0.125525	0.162882	0.144933	0.150624	0.25334	0.0835387	0.185345	0.058626	0.0327111	0.131938	0.254326	0.124321	0.0368923	0.159195	0.0919763	0.193173	0.151	0.206416	0.0575433	0.0572703	0.344444	0.0271027	0.127116	0.102992	0.05476	0.0652889	0.0111778	0.0460222	0.0712464	0.0452286	0.05815	0.0745538	0.0661956	0.103678	0.0564357	0.0175582	0.00656094	0.178544	0.0573825	0.0906014	0.0919763	0.0575113	0.0708191	0.344444	0.0286884	0.0382933
2002-05-18	0.0816273	0.103413	0.0214925	0.125525	0.162882	0.144933	0.150624	0.25334	0.0835387	0.185345	0.058626	0.0327111	0.131938	0.202103	0.124321	0.0368923	0.137506	0.0919763	0.193173	0.151	0.206416	0.0575433	0.0572703	0.344444	0.0271027	0.127116	0.102581	0.05476	0.0652889	0.0111778	0.0460222	0.0712464	0.0452286	0.05815	0.0745538	0.0661956	0.103678	0.0564357	0.0175582	0.00656094	0.17821	0.0573825	0.0906014	0.0919763	0.0575113	0.0708191	0.344444	0.0286884	0.0382933
2002-05-19	0.0816273	0.103413	0.0214925	0.125525	0.162882	0.144933	0.150624	0.25334	0.0835387	0.185345	0.058626	0.0327111	0.131938	0.202103	0.124321	0.0368923	0.137506	0.0919763	0.193173	0.151	0.206416	0.0575433	0.0572703	0.344444	0.0271027	0.127116	0.102581	0.05476	0.0652889	0.0111778	0.0460222	0.0712464	0.0452286	0.05815	0.0745538	0.0661956	0.103678	0.0564357	0.0175582	0.00656094	0.17821	0.0573825	0.0906014	0.0919763	0.0575113	0.0708191	0.344444	0.0286884	0.0382933
2002-05-20	0.0816273	0.103413	0.0214925	0.125525	0.162882	0.144933	0.150624	0.25334	0.0835387	0.185345	0.058626	0.0327111	0.131938	0.202103	0.124321	0.0368923	0.137506	0.0919763	0.193173	0.151	0.201527	0.0575433	0.0572703	0.344444	0.0271027	0.127116	0.102581	0.05476	0.0652889	0.0111778	0.0460222	0.0712464	0.0452286	0.05815	0.0745538	0.0661956	0.103678	0.0564357	0.0175582	0.00656094	0.17821	0.0573825	0.0906014	0.0919763	0.0575113	0.0708191	0.344444	0.0286884	0.0382933
2002-05-21	0.0816273	0.103413	0.0214925	0.125525	0.162831	0.144933	0.150624	0.25334	0.0835387	0.185345	0.058626	0.0327111	0.131938	0.202103	0.124321	0.0368154	0.137506	0.0919763	0.193173	0.151	0.200727	0.0575433	0.0572703	0.344444	0.0271027	0.127116	0.102581	0.05476	0.0652889	0.0111778	0.0452667	0.0712464	0.0452286	0.05815	0.0745538	0.0661956	0.103678	0.0564357	0.0175582	0.00656094	0.145055	0.0573825	0.0906014	0.089371	0.0575113	0.0708191	0.344444	0.0286884	0.0382933
2002-05-22	0.0816273	0.103413	0.0214925	0.125525	0.162831	0.144267	0.150624	0.25334	0.0835387	0.185345	0.058626	0.0327111	0.131938	0.201871	0.124321	0.0368154	0.137354	0.0919763	0.193173	0.146442	0.200727	0.0575433	0.0572703	0.344444	0.0271027	0.127116	0.102439	0.05476	0.0652889	0.0111778	0.0452667	0.0712464	0.0452286	0.05815	0.0715	0.0661956	0.103678	0.0564357	0.0175582	0.00656094	0.145055	0.0573825	0.0906014	0.089371	0.0575113	0.0708191	0.344444	0.0286884	0.0382933
2002-05-23	0.0816273	0.103413	0.0214925	0.125525	0.162831	0.144267	0.150624	0.25334	0.0835387	0.185345	0.037926	0.0327111	0.131938	0.201871	0.124321	0.0368154	0.137354	0.0919763	0.193173	0.146442	0.200727	0.0423967	0.0572703	0.344444	0.0271027	0.127116	0.102439	0.05476	0.0652889	0.0111778	0.0452667	0.0712464	0.0452286	0.05815	0.0715	0.0661956	0.103678	0.0564357	0.0175582	0.00656094	0.145055	0.0573825	0.0906014	0.089371	0.0575113	0.0708191	0.344444	0.0286884	0.0382933
2002-05-24	0.0816273	0.103413	0.0214925	0.125525	0.155231	0.144267	0.150624	0.25334	0.0835387	0.185345	0.0381231	0.0327111	0.131938	0.201871	0.124321	0.0368154	0.137354	0.0919763	0.193173	0.146442	0.194239	0.0423647	0.0572703	0.344444	0.0271027	0.127116	0.102439	0.05476	0.0652889	0.0111778	0.0452667	0.0712464	0.0452286	0.05815	0.0715	0.0661956	0.103678	0.0564357	0.0175582	0.00656094	0.145055	0.0573825	0.0906014	0.089371	0.0575113	0.0708191	0.344444	0.0286884	0.0382933
2002-05-25	0.0784273	0.103413	0.0214925	0.125525	0.155231	0.144267	0.150624	0.25334	0.0835387	0.185345	0.0381231	0.0327111	0.131938	0.201871	0.124321	0.0368154	0.137354	0.0919763	0.193173	0.146442	0.194239	0.0423647	0.0572703	0.344444	0.0271027	0.127116	0.102439	0.05476	0.0652889	0.0111778	0.0452667	0.0712464	0.0452286	0.05815	0.0715	0.0661956	0.103678	0.0564357	0.0175582	0.00656094	0.145055	0.0573825	0.0906014	0.089371	0.0575113	0.0708191	0.344444	0.0286884	0.0382933
2002-05-26	0.0779455	0.103413	0.0214925	0.125525	0.155231	0.144267	0.150624	0.25334	0.0835387	0.185345	0.0381231	0.0327111	0.131938	0.201871	0.124321	0.0368154	0.137354	0.0919763	0.193173	0.146442	0.194239	0.0423647	0.0572703	0.344444	0.0271027	0.127116	0.102439	0.05476	0.0355222	0.0111778	0.0452667	0.0712464	0.0452286	0.05815	0.0715	0.0661956	0.103678	0.0564357	0.0175582	0.00656094	0.145055	0.0573825	0.0906014	0.089371	0.0575113	0.06901	0.344444	0.0286884	0.0382933
2002-05-27	0.0779455	0.103413	0.0214925	0.125525	0.155231	0.144267	0.150624	0.25334	0.0835387	0.185345	0.0381231	0.0327111	0.131812	0.201871	0.124321	0.0348154	0.137354	0.0919763	0.193173	0.145994	0.194239	0.0423647	0.0572703	0.344444	0.0271027	0.0898026	0.102439	0.05476	0.0355222	0.0111778	0.0452667	0.0712464	0.0452286	0.05815	0.0715	0.0661956	0.103678	0.0564357	0.0175582	0.00656094	0.145055	0.0573825	0.0906014	0.089371	0.0575113	0.06901	0.344444	0.0286884	0.0382933
2002-05-28	0.0629455	0.103413	0.0214925	0.125525	0.155231	0.144267	0.150624	0.25334	0.0835387	0.185345	0.0381231	0.0327111	0.131812	0.201871	0.124321	0.0261282	0.137354	0.0919763	0.193173	0.145994	0.194239	0.0423647	0.0572703	0.344444	0.0271027	0.0898026	0.102439	0.05476	0.0355222	0.0111778	0.0452667	0.0712464	0.0452286	0.05815	0.0715	0.0661956	0.103678	0.0564357	0.0175582	0.00656094	0.145055	0.0573825	0.0906014	0.089371	0.0575113	0.06901	0.344444	0.0286884	0.0382933
2002-05-29	0.0629455	0.103413	0.0214925	0.125525	0.155231	0.144267	0.150624	0.218261	0.0835387	0.185345	0.0381231	0.0327111	0.131812	0.201871	0.124321	0.0261282	0.137354	0.0919763	0.193173	0.145994	0.194239	0.0423647	0.0572703	0.344444	0.0271027	0.0898026	0.102439	0.05476	0.0355222	0.0111778	0.0452667	0.0712464	0.0452286	0.05815	0.0715	0.0661956	0.103678	0.0564357	0.0175582	0.00656094	0.145055	0.0573825	0.0906014	0.089371	0.0575113	0.06901	0.344444	0.0286884	0.0382933
2002-05-30	0.0629455	0.103413	0.0214925	0.125525	0.155231	0.120267	0.150624	0.218261	0.0835387	0.185345	0.0381231	0.0327111	0.131812	0.201871	0.124321	0.0261282	0.137354	0.0919763	0.193173	0.145994	0.194239	0.0423647	0.0572703	0.344444	0.0271027	0.0898026	0.102439	0.05476	0.0320556	0.0111778	0.0452667	0.0712464	0.0452286	0.05815	0.0715	0.0661956	0.103678	0.0564357	0.0175582	0.00656094	0.145055	0.0573825	0.0906014	0.089371	0.0575113	0.06901	0.344444	0.0286884	0.0382933
2002-05-31	0.0629455	0.103413	0.0214925	0.125525	0.155231	0.120267	0.150624	0.218261	0.0835387	0.185345	0.0381231	0.0327111	0.131812	0.201871	0.124321	0.0261282	0.137354	0.0919763	0.193173	0.145994	0.219373	0.0423647	0.0572703	0.344444	0.0271027	0.0898026	0.102439	0.05476	0.0320556	0.0111778	0.0374	0.0712464	0.0452286	0.05815	0.0715	0.0661956	0.103678	0.0562419	0.0175582	0.00656094	0.145055	0.0573825	0.0906014	0.089371	0.0575113	0.06901	0.344444	0.0286884	0.0382933
2002-06-01	0.0629455	0.103413	0.0214925	0.125525	0.155231	0.120267	0.150624	0.218261	0.0835387	0.185345	0.0381231	0.0327111	0.131812	0.201871	0.124321	0.0261282	0.137354	0.0919763	0.116773	0.145994	0.219373	0.0423647	0.0572703	0.344444	0.0271027	0.0898026	0.102439	0.05476	0.0320556	0.0111778	0.0374	0.0712464	0.0452286	0.05815	0.0715	0.0661956	0.103678	0.0562419	0.0175582	0.00656094	0.145055	0.0573825	0.0906014	0.089371	0.0575113	0.06901	0.344444	0.0286884	0.0382933
2002-06-02	0.0629455	0.103413	0.0214925	0.125525	0.155231	0.120267	0.150624	0.218261	0.0835387	0.178679	0.0381231	0.0327111	0.131812	0.201871	0.124321	0.0261282	0.137354	0.0919763	0.116773	0.145994	0.217151	0.0423647	0.0572703	0.344444	0.0271027	0.0898026	0.102439	0.05476	0.0320556	0.0111778	0.0373333	0.0712464	0.0452286	0.05815	0.0715	0.0661956	0.103644	0.0562419	0.0175582	0.00656094	0.145055	0.0573825	0.0734014	0.089371	0.0575113	0.06901	0.344444	0.0286884	0.0382933
2002-06-03	0.0629455	0.103413	0.0214925	0.125525	0.155231	0.120267	0.150624	0.218261	0.0835387	0.178679	0.0381231	0.0327111	0.131812	0.201871	0.124321	0.0261282	0.137354	0.0919763	0.116773	0.145994	0.217151	0.0423647	0.0572703	0.344444	0.0271027	0.0898026	0.0868121	0.05476	0.0320556	0.0111778	0.0373333	0.0712464	0.0452286	0.05815	0.0715	0.0661956	0.103644	0.0562419	0.0175582	0.00656094	0.145055	0.0573825	0.0734014	0.089371	0.0575113	0.06901	0.344444	0.0286884	0.0382933
2002-06-04	0.0629455	0.103413	0.0214925	0.125525	0.155231	0.120267	0.150624	0.218261	0.0835387	0.178679	0.0381231	0.0327111	0.131812	0.200848	0.124321	0.0261282	0.135939	0.0919763	0.116773	0.145994	0.192016	0.0423647	0.0572703	0.344444	0.0271027	0.0898026	0.0868121	0.05476	0.0320556	0.0111778	0.0374	0.0712464	0.0452286	0.05815	0.0715	0.0661956	0.103644	0.0562419	0.0175582	0.00656094	0.137677	0.0573825	0.0734014	0.089371	0.0575113	0.06901	0.344444	0.0286884	0.0382933
2002-06-05	0.0629455	0.103413	0.0214925	0.125525	0.155231	0.120267	0.150624	0.218261	0.0835387	0.178679	0.0381231	0.0327111	0.131812	0.200848	0.124321	0.0261282	0.135939	0.0919763	0.116773	0.145994	0.140183	0.0423647	0.0567048	0.344444	0.0271027	0.0898026	0.0675515	0.05476	0.0320556	0.0111778	0.0374	0.0712464	0.0452286	0.05815	0.0707	0.0661956	0.103644	0.0579753	0.0175582	0.00656094	0.137677	0.0573825	0.0734014	0.089371	0.0575113	0.06901	0.344444	0.0286884	0.0382933
2002-06-06	0.0629455	0.103413	0.0214925	0.125525	0.155231	0.120267	0.150624	0.218261	0.0835387	0.178679	0.0378564	0.0327111	0.131812	0.200848	0.124321	0.0261282	0.135939	0.0919763	0.116773	0.145994	0.140183	0.0393247	0.0567048	0.344444	0.0271027	0.0898026	0.0675515	0.05476	0.0320556	0.0111778	0.0374	0.0692464	0.0452286	0.05815	0.0707	0.0661956	0.103644	0.0579753	0.0175582	0.00656094	0.137677	0.0573825	0.0734014	0.089371	0.0575113	0.06901	0.344444	0.0286884	0.0382933
2002-06-07	0.0629455	0.103413	0.0214925	0.125525	0.155231	0.120267	0.150624	0.218261	0.0835387	0.178458	0.0378564	0.0327111	0.131812	0.179737	0.124321	0.0261282	0.116861	0.0919763	0.116773	0.145994	0.138203	0.0393247	0.0567048	0.344444	0.0271027	0.0898026	0.0675515	0.05476	0.0320556	0.0111778	0.0374	0.0692464	0.0452286	0.05815	0.0707	0.0661956	0.103644	0.0579753	0.0175582	0.00656094	0.137677	0.0573825	0.0734014	0.089371	0.0575113	0.06901	0.344444	0.0286884	0.0382933
2002-06-08	0.0369455	0.103413	0.0214925	0.125525	0.155231	0.120267	0.150624	0.218261	0.0835387	0.178458	0.0378564	0.0327111	0.131812	0.0424039	0.124321	0.0261282	0.0343945	0.0919763	0.116773	0.145994	0.138203	0.0393247	0.0567048	0.344444	0.0271027	0.0898026	0.0568315	0.05476	0.0320556	0.0111778	0.0374	0.0692464	0.0452286	0.05815	0.0707	0.0661956	0.103644	0.0579753	0.0175582	0.00656094	0.137677	0.0573825	0.0734014	0.089371	0.0575113	0.06901	0.344444	0.0286884	0.0382933
2002-06-09	0.0369455	0.103413	0.0214925	0.125525	0.155231	0.120267	0.150624	0.218261	0.0835387	0.178458	0.0378564	0.0327111	0.131812	0.0424039	0.124321	0.0261282	0.0343945	0.0919763	0.116773	0.145994	0.138203	0.0393247	0.0567048	0.344444	0.0271027	0.0898026	0.0406448	0.05476	0.0320556	0.0111778	0.0374	0.0692464	0.0452286	0.05815	0.0707	0.0661956	0.103644	0.0579753	0.0175582	0.00656094	0.137677	0.0573825	0.0734014	0.089371	0.0575113	0.06901	0.344444	0.0286884	0.0382933
2002-06-10	0.0369455	0.103413	0.0214925	0.125525	0.155231	0.120267	0.150624	0.186509	0.0835387	0.178458	0.037685	0.0327111	0.131812	0.0424039	0.124321	0.0261282	0.0343945	0.0919763	0.110373	0.145994	0.138203	0.0393247	0.0567048	0.344444	0.0264098	0.0898026	0.0406448	0.05476	0.0320556	0.0111778	0.0374	0.0692464	0.0452286	0.05815	0.0707	0.0661956	0.103644	0.049503	0.0175582	0.00656094	0.137677	0.0573825	0.0734014	0.089371	0.0575113	0.06901	0.344444	0.0286884	0.0382933
2002-06-11	0.0369455	0.103253	0.0214925	0.125525	0.153497	0.120267	0.150624	0.186509	0.0835387	0.178458	0.037685	0.0327111	0.131812	0.0424039	0.124321	0.0261282	0.0342993	0.0919763	0.110373	0.145994	0.138203	0.0393247	0.0567048	0.344444	0.0264098	0.0898026	0.0406448	0.05476	0.0320556	0.0111778	0.0374	0.0692464	0.0452286	0.05815	0.0623	0.0661956	0.103644	0.049503	0.0175582	0.00656094	0.137677	0.0573825	0.0734014	0.089371	0.0575113	0.06901	0.344444	0.0286884	0.0382933
2002-06-12	0.0369455	0.103253	0.0214925	0.125525	0.153497	0.120133	0.150624	0.186509	0.0835387	0.178458	0.037685	0.0327111	0.131812	0.0424039	0.124321	0.0261282	0.0342993	0.0674218	0.110373	0.145994	0.138203	0.0393247	0.0595975	0.344444	0.0264098	0.0898026	0.0406448	0.05476	0.0320556	0.0111778	0.0374	0.0692464	0.0452286	0.05815	0.0623	0.0661956	0.103644	0.049503	0.0175582	0.00656094	0.137677	0.0573825	0.0734014	0.089371	0.0575113	0.06901	0.344444	0.0286884	0.0382933
2002-06-13	0.0369455	0.103253	0.0214925	0.125525	0.153497	0.0854667	0.147524	0.186509	0.0835387	0.178458	0.037685	0.0327111	0.131812	0.0424039	0.124321	0.0231282	0.0342993	0.0674218	0.110373	0.143012	0.138203	0.0393247	0.0595975	0.344444	0.0264098	0.0696426	0.0406448	0.05476	0.0320556	0.0111778	0.0374	0.0692464	0.0452286	0.05815	0.0623	0.0661956	0.103644	0.049503	0.0175582	0.00656094	0.137677	0.0573825	0.0734014	0.089371	0.0575113	0.06901	0.344444	0.0286884	0.0382933
2002-06-14	0.0369455	0.103253	0.0214925	0.125525	0.153431	0.0854667	0.147524	0.186509	0.0834498	0.178325	0.037685	0.0327111	0.131812	0.0360484	0.124321	0.0231282	0.0308993	0.0674218	0.110373	0.143012	0.138203	0.0346847	0.0595975	0.344444	0.0264098	0.0696426	0.0406448	0.05476	0.0320556	0.0111778	0.0374	0.0692464	0.0452286	0.05815	0.0623	0.0661956	0.103644	0.049503	0.0175582	0.00656094	0.137677	0.0573825	0.0734014	0.089371	0.0575113	0.06901	0.344444	0.0286884	0.0382933
2002-06-15	0.0369455	0.103253	0.0214925	0.125525	0.153431	0.0854667	0.147524	0.186509	0.0834498	0.178325	0.037685	0.0327111	0.131812	0.0360484	0.124321	0.0229282	0.0308993	0.0674218	0.110373	0.143012	0.138203	0.0346847	0.0595975	0.344444	0.0264098	0.0430026	0.0406448	0.05476	0.0320556	0.0111778	0.0374	0.0692464	0.0452286	0.05815	0.0039	0.0661956	0.103644	0.049503	0.0175582	0.00656094	0.137677	0.0573825	0.0734014	0.089371	0.0575113	0.06901	0.344444	0.0286884	0.0382933
2002-06-16	0.0369455	0.103253	0.0214925	0.125525	0.153431	0.0854667	0.147524	0.186509	0.0834498	0.178325	0.037685	0.0327111	0.131812	0.0360484	0.124321	0.0213615	0.0308993	0.0674218	0.04584	0.143012	0.138203	0.0346847	0.0595975	0.344444	0.0264098	0.0430026	0.0406448	0.05476	0.0320556	0.0111778	0.0374	0.0692464	0.0452286	0.05815	0.0039	0.0661956	0.103644	0.049503	0.0175582	0.00656094	0.13101	0.0573825	0.0734014	0.089371	0.0575113	0.06901	0.344444	0.0286884	0.0382933
2002-06-17	0.0317455	0.103173	0.0214925	0.125525	0.153431	0.0854667	0.147524	0.186509	0.0834498	0.177871	0.037685	0.0327111	0.131812	0.0360484	0.124321	0.0213615	0.0308993	0.0674218	0.04584	0.143012	0.138203	0.0346847	0.0595975	0.344444	0.0264098	0.0186026	0.0406448	0.05476	0.0320556	0.0111778	0.0374	0.0560176	0.0452286	0.05815	0.0039	0.0661956	0.103644	0.049503	0.0175582	0.00656094	0.13101	0.0573825	0.0734014	0.089371	0.0575113	0.06901	0.344444	0.0286884	0.0382933
2002-06-18	0.0317455	0.103173	0.0214925	0.125525	0.153431	0.0834667	0.147524	0.186509	0.0834498	0.177871	0.037685	0.0327111	0.131812	0.0360484	0.124321	0.0213615	0.0308993	0.0674218	0.04584	0.143012	0.138203	0.0346847	0.0595975	0.344444	0.0264098	0.0186026	0.0406448	0.05476	0.0168556	0.0111778	0.0374	0.0560176	0.0452286	0.05815	0.0039	0.0661956	0.103644	0.049503	0.0175582	0.00656094	0.13101	0.0573825	0.0734014	0.089371	0.0575113	0.06901	0.344444	0.0286884	0.0382933
2002-06-19	0.0317455	0.103173	0.0214925	0.125525	0.153431	0.0748	0.147524	0.180086	0.0834498	0.177871	0.037685	0.0327111	0.131812	0.0360484	0.124321	0.0213615	0.0308993	0.0674218	0.04584	0.143012	0.11792	0.0346847	0.0595975	0.344444	0.0264098	0.0186026	0.0406448	0.05476	0.0168556	0.0111778	0.0374	0.0560176	0.0452286	0.05815	0.0039	0.0661956	0.103644	0.049503	0.0175582	0.00656094	0.13101	0.0573825	0.0734014	0.089371	0.0575113	0.06901	0.344444	0.0286884	0.0382933
2002-06-20	0.0317455	0.103173	0.0214925	0.125525	0.153431	0.0748	0.147524	0.180086	0.0778117	0.126449	0.037685	0.0327111	0.131288	0.0360484	0.124321	0.0213615	0.0308993	0.0674218	0.04584	0.143012	0.11792	0.0346847	0.0595975	0.344444	0.0264098	0.0186026	0.00763145	0.05476	0.0168556	0.0111778	0.0374	0.0560176	0.0452286	0.056975	0.0038	0.0661956	0.103644	0.049503	0.0175582	0.00656094	0.13101	0.0573825	0.0734014	0.089371	0.0575113	0.06901	0.344444	0.0286884	0.0382933
2002-06-21	0.0317455	0.103173	0.0214925	0.124485	0.153431	0.0748	0.147524	0.180086	0.0778117	0.126449	0.037685	0.0327111	0.131288	0.0360484	0.124321	0.0213615	0.0308993	0.0674218	0.04584	0.119012	0.106809	0.0346847	0.0595975	0.344444	0.0264098	0.0186026	0.00763145	0.05476	0.0168556	0.0111778	0.0372667	0.0560176	0.0452286	0.056975	0.0038	0.0661956	0.103644	0.049503	0.0175582	0.00656094	0.13101	0.0573825	0.0734014	0.089371	0.0575113	0.06901	0.344444	0.0286884	0.0382933
2002-06-22	0.0317455	0.103173	0.0214925	0.124485	0.153431	0.0748	0.147524	0.180086	0.0778117	0.126449	0.037685	0.0327111	0.131288	0.0360484	0.124321	0.0213615	0.0308993	0.0674218	0.04584	0.119012	0.106809	0.0346847	0.0595975	0.344444	0.0264098	0.0186026	0.00763145	0.05476	0.0168556	0.0111778	0.0372667	0.0560176	0.0452286	0.056975	0.0038	0.0661956	0.103644	0.049503	0.0175582	0.00656094	0.13101	0.0573825	0.0734014	0.089371	0.0575113	0.06901	0.344444	0.0286884	0.0382933
2002-06-23	0.0263727	0.103173	0.0214925	0.124485	0.153379	0.0748	0.147524	0.180086	0.0774498	0.126449	0.037685	0.0327111	0.131288	0.0357389	0.124321	0.0213615	0.0308993	0.0674218	0.04584	0.119012	0.106809	0.0346847	0.0595975	0.344444	0.0264098	0.0186026	0.00763145	0.05476	0.0168556	0.0111778	0.0372667	0.0560176	0.0452286	0.056975	0.0038	0.0661956	0.103644	0.049503	0.0175582	0.00656094	0.13101	0.0573825	0.0734014	0.089371	0.0575113	0.06901	0.344444	0.0286884	0.0382933
2002-06-24	0.0263727	0.103173	0.0214925	0.124485	0.153379	0.0748	0.147524	0.16706	0.0774498	0.126449	0.037685	0.0327111	0.131288	0.0354426	0.124321	0.0213615	0.0308993	0.0674218	0.04584	0.116406	0.106809	0.0346847	0.0595975	0.344444	0.0264098	0.0186026	0.00763145	0.05476	0.0168556	0.0111778	0.0372667	0.0560176	0.0452286	0.056975	0.0038	0.0661956	0.103644	0.049503	0.0175582	0.00656094	0.13101	0.0573825	0.0734014	0.089371	0.0575113	0.06901	0.344444	0.0286884	0.0382933
2002-06-25	0.0253727	0.103173	0.0214925	0.123605	0.153379	0.0748	0.147524	0.16706	0.0774498	0.123382	0.037685	0.0327111	0.131288	0.0354426	0.124321	0.0213615	0.0308993	0.0674218	0.04584	0.116406	0.106809	0.0346847	0.0595975	0.344444	0.0264098	0.0186026	0.00763145	0.05476	0.0168556	0.0111778	0.0372667	0.0560176	0.0452286	0.056975	0.0038	0.0661956	0.103644	0.0483197	0.0175582	0.00656094	0.13101	0.0573825	0.0734014	0.089371	0.0575113	0.06901	0.344444	0.0286884	0.0382933
2002-06-26	0.0253727	0.103173	0.0164448	0.123285	0.153379	0.0713333	0.147524	0.16706	0.0774498	0.123049	0.037685	0.0327111	0.131087	0.0354426	0.124321	0.0212846	0.0308993	0.0671403	0.0347733	0.116406	0.106809	0.0346847	0.0595975	0.344444	0.0264098	0.0186026	0.00763145	0.05476	0.0168556	0.0111778	0.0372667	0.0560176	0.0452286	0.056975	0.00372308	0.0661956	0.103644	0.0483197	0.0175582	0.00656094	0.13101	0.0573825	0.0734014	0.089371	0.0575113	0.06901	0.344444	0.0286884	0.0382933
2002-06-27	0.0253727	0.103173	0.0164448	0.123285	0.153379	0.0713333	0.147524	0.16706	0.0774498	0.123049	0.037685	0.0327111	0.131025	0.0341981	0.124321	0.0197077	0.0308993	0.0671403	0.0347733	0.116406	0.106809	0.0346847	0.0595975	0.344444	0.0264098	0.0186026	0.00763145	0.05476	0.0168556	0.0111778	0.0372667	0.0560176	0.0452286	0.056975	0.00372308	0.0661956	0.103644	0.0483197	0.0175582	0.00656094	0.13101	0.0573825	0.0734014	0.089371	0.0575113	0.06901	0.344444	0.0286884	0.0382933
2002-06-28	0.0253727	0.103173	0.0164448	0.123285	0.149113	0.0701333	0.147524	0.16706	0.0774498	0.123049	0.037685	0.0327111	0.083025	0.0341981	0.124321	0.0197077	0.0308993	0.0671403	0.0347733	0.116406	0.106809	0.0324193	0.0595975	0.344444	0.0264098	0.0186026	0.00763145	0.05476	0.0168556	0.0111778	0.0372667	0.0560176	0.0452286	0.056975	0.00372308	0.0661956	0.103644	0.0483197	0.0175582	0.00656094	0.13101	0.0573825	0.0734014	0.089371	0.0575113	0.06901	0.344444	0.0286884	0.0382933
2002-06-29	0.0253727	0.103173	0.0162032	0.119738	0.149113	0.0708	0.147524	0.158497	0.0774498	0.123049	0.037685	0.0327111	0.083025	0.0319759	0.124321	0.013641	0.026166	0.0671403	0.0347733	0.116406	0.106809	0.0324193	0.0595975	0.344444	0.0264098	0.0186026	0.00763145	0.05476	0.0168556	0.0111778	0.0372667	0.0560176	0.0452286	0.056975	0.00349231	0.0661956	0.103644	0.0483197	0.0175582	0.00656094	0.13101	0.0573825	0.0734014	0.089371	0.0575113	0.06901	0.344444	0.0286884	0.0382933
2002-06-30	0.0250091	0.103173	0.0162032	0.119738	0.149113	0.0664	0.147524	0.158497	0.0774498	0.123049	0.037685	0.0327111	0.083025	0.0301008	0.124321	0.013641	0.026166	0.0671403	0.0243733	0.116406	0.106809	0.0324193	0.0595975	0.344444	0.0264098	0.00420256	0.00763145	0.05476	0.0168556	0.0111778	0.0372667	0.0560176	0.0452286	0.056975	0.00349231	0.0660474	0.103644	0.0481011	0.0175582	0.00656094	0.13101	0.0573825	0.0734014	0.089371	0.0575113	0.06901	0.344444	0.0286884	0.0382933
2002-07-01	0.0250091	0.103173	0.0162032	0.119738	0.146179	0.0664	0.147524	0.146275	0.0721482	0.123049	0.037685	0.0327111	0.083025	0.0301008	0.124321	0.013641	0.026166	0.0671403	0.0243733	0.116406	0.106809	0.0324193	0.0582975	0.344444	0.0264098	0.00420256	0.00763145	0.05476	0.0168556	0.0111778	0.0372667	0.0560176	0.0452286	0.036475	0.00349231	0.0660474	0.103644	0.0481011	0.0175582	0.00656094	0.13101	0.0573825	0.0734014	0.089371	0.0575113	0.0651646	0.344444	0.0286884	0.0382933
2002-07-02	0.0250091	0.103173	0.0162032	0.119738	0.146179	0.0664	0.147524	0.146275	0.0721482	0.123049	0.037685	0.0327111	0.083025	0.0301008	0.124321	0.013641	0.026166	0.0671403	0.0243733	0.116406	0.106809	0.0324193	0.0582975	0.29	0.0264098	0.00420256	0.00727545	0.05476	0.0168556	0.0111778	0.0372667	0.0560176	0.0452286	0.034175	0.00349231	0.0660474	0.103644	0.0481011	0.0175582	0.00656094	0.0883436	0.0573825	0.0734014	0.089371	0.0575113	0.0651646	0.344444	0.0286884	0.0382933
2002-07-03	0.0250091	0.103173	0.0162032	0.119738	0.146179	0.0664	0.147524	0.146275	0.0721482	0.123049	0.037685	0.0327111	0.083025	0.0299246	0.124321	0.013641	0.026166	0.0671403	0.0243733	0.116406	0.106809	0.0324193	0.0582975	0.29	0.0264098	0.00420256	0.00727545	0.05476	0.00376667	0.0111778	0.0372667	0.0560176	0.0452286	0.034175	0.00349231	0.0660474	0.103644	0.0481011	0.0167849	0.00656094	0.0738769	0.0573825	0.0734014	0.089371	0.0575113	0.0651646	0.344444	0.0286884	0.0382933
2002-07-04	0.0250091	0.103173	0.0162032	0.119738	0.145856	0.0664	0.147524	0.146275	0.0721482	0.123049	0.037685	0.0327111	0.083025	0.0299246	0.124321	0.00724103	0.026166	0.0671403	0.0163733	0.116406	0.106809	0.0324193	0.0582975	0.29	0.0264098	0.00420256	0.00727545	0.05476	0.00376667	0.0111778	0.0372667	0.0560176	0.0452286	0.033625	0.00349231	0.0660474	0.103644	0.0481011	0.0167849	0.00656094	0.0738769	0.0573825	0.0734014	0.089371	0.0575113	0.0587103	0.344444	0.0286884	0.0382933
2002-07-05	0.0250091	0.103173	0.0162032	0.119738	0.145856	0.0664	0.147524	0.146275	0.0721482	0.123049	0.037685	0.0327111	0.083025	0.0299246	0.124321	0.00724103	0.026166	0.0671403	0.0163733	0.116406	0.106809	0.0324193	0.0582975	0.29	0.0264098	0.00420256	0.00727545	0.0284267	0.00376667	0.0111778	0.0372667	0.0560176	0.0452286	0.032025	0.00349231	0.0283585	0.103644	0.0481011	0.0167849	0.00656094	0.0738769	0.0573825	0.0734014	0.089371	0.0575113	0.0587103	0.344444	0.0286884	0.0382933
2002-07-06	0.0250091	0.103173	0.0162032	0.115298	0.145856	0.0664	0.147524	0.146275	0.0721482	0.123049	0.037685	0.0327111	0.083025	0.0299246	0.124321	0.00724103	0.026166	0.0671403	0.0163733	0.102127	0.106809	0.0324193	0.0582975	0.29	0.0264098	0.00420256	0.00727545	0.0284267	0.00376667	0.0111778	0.0352667	0.0560176	0.0452286	0.032025	0.00349231	0.0283585	0.103644	0.0481011	0.0167849	0.00656094	0.0738769	0.0573825	0.0714014	0.089371	0.0575113	0.0587103	0.344444	0.0286884	0.0382933
2002-07-07	0.0250091	0.103173	0.0162032	0.115298	0.145754	0.0510667	0.147524	0.146275	0.0721482	0.122915	0.037685	0.0327111	0.083025	0.0299246	0.124321	0.00724103	0.026166	0.0671403	0.0163733	0.102127	0.106809	0.0324193	0.0554048	0.29	0.0264098	0.00420256	0.00727545	0.0284267	0.00376667	0.0111778	0.0352667	0.0560176	0.0452286	0.032025	0.00349231	0.0283585	0.103644	0.0481011	0.0163049	0.00656094	0.0738769	0.0573825	0.0714014	0.089371	0.0575113	0.0587103	0.344444	0.0286884	0.0382933
2002-07-08	0.0250091	0.103173	0.0162032	0.115298	0.145754	0.0510667	0.147524	0.146275	0.0721482	0.122915	0.037685	0.0327111	0.083025	0.0299246	0.124321	0.00724103	0.026166	0.0671403	0.0163733	0.102127	0.106809	0.0324193	0.0554048	0.29	0.0264098	0.00420256	0.00727545	0.0284267	0.00376667	0.0111778	0.0352667	0.0560176	0.0452286	0.032025	0.00349231	0.0283585	0.103644	0.0481011	0.0163049	0.00656094	0.0738769	0.0366825	0.0714014	0.089371	0.0575113	0.0587103	0.344444	0.0286884	0.0382933
2002-07-09	0.0250091	0.103173	0.0162032	0.115298	0.145754	0.0416	0.147524	0.145875	0.0721482	0.122915	0.037685	0.0327111	0.066025	0.0299246	0.124321	0.00724103	0.026166	0.047407	0.0163733	0.102127	0.106809	0.0324193	0.0554048	0.29	0.0264098	0.00420256	0.00727545	0.0284267	0.00376667	0.0111778	0.0352667	0.0560176	0.0452286	0.032025	0.00329231	0.0283585	0.103644	0.0481011	0.0163049	0.00656094	0.0738769	0.0366825	0.0714014	0.089371	0.0575113	0.0587103	0.344444	0.0286884	0.0382933
2002-07-10	0.0250091	0.103173	0.0162032	0.115298	0.145754	0.0416	0.147524	0.145875	0.0721482	0.122915	0.037685	0.0327111	0.066025	0.0299246	0.124321	0.0071641	0.026166	0.047407	0.0163733	0.102127	0.106675	0.0324193	0.0554048	0.29	0.0264098	0.00420256	0.00727545	0.0284267	0.00376667	0.0111778	0.0352667	0.0560176	0.0452286	0.032025	0.00329231	0.0283585	0.103644	0.0410677	0.0163049	0.00656094	0.0738769	0.0366825	0.0714014	0.089371	0.0575113	0.0587103	0.344444	0.0286884	0.0382933
2002-07-11	0.0225091	0.103173	0.0162032	0.115298	0.145754	0.0416	0.147524	0.145875	0.0721482	0.122915	0.037685	0.0327111	0.066025	0.0299246	0.124321	0.0071641	0.026166	0.047407	0.0163733	0.102127	0.106675	0.0324193	0.0554048	0.29	0.0264098	0.00420256	0.00727545	0.0284267	0.00376667	0.0111778	0.0352667	0.0560176	0.0452286	0.032025	0.00329231	0.0283585	0.103644	0.0410677	0.0163049	0.00656094	0.0738769	0.0366825	0.0714014	0.089371	0.0575113	0.0587103	0.344444	0.0286884	0.0382933
2002-07-12	0.0225091	0.103013	0.0162032	0.115298	0.145754	0.0416	0.147524	0.145875	0.0721482	0.0897598	0.037685	0.0327111	0.066025	0.0299246	0.124321	0.0071641	0.026166	0.047407	0.0163733	0.102127	0.106675	0.0324193	0.0554048	0.29	0.0264098	0.00372256	0.00727545	0.0284267	0.00366667	0.0111778	0.0352667	0.0560176	0.0452286	0.032025	0.00329231	0.0283585	0.103644	0.0410677	0.0163049	0.00656094	0.0738769	0.0366825	0.0714014	0.089371	0.0575113	0.0587103	0.344444	0.0286884	0.0382933
2002-07-13	0.0225091	0.103013	0.0162032	0.0963651	0.145636	0.0408	0.128357	0.145875	0.0721482	0.0897598	0.037685	0.0327111	0.066025	0.0299246	0.124321	0.0071641	0.026166	0.047407	0.0163733	0.102127	0.0699958	0.0324193	0.0554048	0.29	0.0264098	0.00372256	0.00727545	0.0284267	0.00366667	0.0111778	0.0352667	0.0560176	0.0452286	0.032025	0.00329231	0.0283585	0.103644	0.0410677	0.0163049	0.00656094	0.0738769	0.0366825	0.0714014	0.089371	0.0575113	0.0587103	0.344444	0.0286884	0.0382933
2002-07-14	0.0225091	0.103013	0.0161198	0.0890851	0.145636	0.0408	0.128357	0.145875	0.0721482	0.0897598	0.037685	0.0327111	0.066025	0.0299246	0.124321	0.0071641	0.026166	0.047407	0.0163733	0.102127	0.0699958	0.0324193	0.0554048	0.29	0.0264098	0.00372256	0.00727545	0.0284267	0.00366667	0.0111778	0.0352667	0.0560176	0.0452286	0.032025	0.00329231	0.0283585	0.103644	0.0410677	0.0163049	0.00656094	0.0738769	0.0366825	0.0714014	0.089371	0.0575113	0.0587103	0.344444	0.0286884	0.0382933
2002-07-15	0.0225091	0.103013	0.0161198	0.0814051	0.145636	0.0408	0.127357	0.145875	0.0721482	0.0897598	0.037685	0.0327111	0.066025	0.0299246	0.124321	0.0069641	0.026166	0.047407	0.0163733	0.102127	0.0699958	0.0324193	0.0554048	0.29	0.0264098	0.00372256	0.00727545	0.0284267	0.00366667	0.0111778	0.0352667	0.0560176	0.0452286	0.032025	0.00329231	0.0283585	0.103644	0.0410677	0.0163049	0.00656094	0.0738769	0.0366825	0.0714014	0.0890895	0.0575113	0.0587103	0.344444	0.0286884	0.0382933
2002-07-16	0.0225091	0.103013	0.0161198	0.0814051	0.145636	0.0352	0.127357	0.145875	0.0721482	0.0846043	0.036685	0.0327111	0.066025	0.0299246	0.124321	0.0069641	0.026166	0.047407	0.0161867	0.102127	0.0699958	0.0324193	0.0554048	0.29	0.0264098	0.00372256	0.00727545	0.0284267	0.00366667	0.0111778	0.0352667	0.0560176	0.0452286	0.032025	0.00329231	0.0283585	0.103644	0.0410677	0.0163049	0.00656094	0.0738769	0.0366825	0.0714014	0.0890895	0.0575113	0.0567048	0.344444	0.0286884	0.0382933
2002-07-17	0.0225091	0.102853	0.0161198	0.0814051	0.141369	0.0352	0.117769	0.145875	0.0721482	0.0832607	0.036685	0.0327111	0.066025	0.0299246	0.124321	0.0069641	0.026166	0.047407	0.0161867	0.102127	0.0699958	0.0324193	0.0554048	0.29	0.0264098	0.00372256	0.00727545	0.0284267	0.00366667	0.0111778	0.0352667	0.0560176	0.0452286	0.032025	0.00299231	0.0283585	0.103644	0.0410677	0.0163049	0.00656094	0.0738769	0.0366825	0.0714014	0.0890895	0.0575113	0.0567048	0.344444	0.0286884	0.0382933
2002-07-18	0.0225091	0.102853	0.0161198	0.0814051	0.141369	0.0352	0.117769	0.145875	0.0721482	0.068794	0.036685	0.0327111	0.066025	0.0299246	0.122321	0.0069641	0.026166	0.047407	0.0161867	0.101436	0.0699958	0.0324193	0.0554048	0.29	0.0264098	0.00372256	0.00727545	0.0284267	0.00366667	0.0111778	0.0352667	0.0560176	0.0452286	0.027025	0.00299231	0.0283585	0.103644	0.0410677	0.0163049	0.00656094	0.0738769	0.0366825	0.0714014	0.0890895	0.0575113	0.0567048	0.344444	0.0286884	0.0382933
2002-07-19	0.0225091	0.102853	0.0161198	0.0700489	0.131903	0.0352	0.115653	0.145875	0.0721482	0.0673718	0.036685	0.0327111	0.066025	0.0299246	0.122321	0.0069641	0.026166	0.047407	0.0161867	0.101436	0.0699958	0.0324193	0.0554048	0.29	0.0264098	0.00372256	0.00727545	0.0284267	0.00366667	0.0111778	0.0352667	0.0560176	0.0452286	0.027025	0.00299231	0.0283585	0.103644	0.0410677	0.0159849	0.00656094	0.0258103	0.0366825	0.0714014	0.0890895	0.0575113	0.0567048	0.344444	0.0286884	0.0382933
2002-07-20	0.0225091	0.102853	0.0161198	0.0700489	0.131903	0.0352	0.115653	0.145875	0.0721482	0.0673718	0.036685	0.0327111	0.066025	0.0299246	0.122321	0.0069641	0.026166	0.047407	0.0161867	0.101436	0.0699958	0.0324193	0.0554048	0.29	0.0264098	0.00372256	0.00727545	0.0284267	0.00366667	0.0111778	0.0352667	0.061154	0.0452286	0.027025	0.00299231	0.0283585	0.0924444	0.0410677	0.0159849	0.00656094	0.0258103	0.0366825	0.0714014	0.0890895	0.0575113	0.0567048	0.344444	0.0286884	0.0382933
2002-07-21	0.0225091	0.102853	0.0161198	0.0700489	0.131903	0.0352	0.115653	0.145875	0.0721482	0.0673718	0.036685	0.0327111	0.066025	0.0296177	0.122321	0.0069641	0.026166	0.047407	0.0156533	0.101436	0.0699958	0.0324193	0.0539648	0.29	0.0264098	0.00360923	0.00431545	0.0284267	0.00366667	0.0111778	0.0352667	0.0414661	0.0452286	0.027025	0.00299231	0.0283585	0.0924444	0.0393344	0.0159849	0.00656094	0.0258103	0.0366825	0.0714014	0.0890895	0.0575113	0.0567048	0.344444	0.0286884	0.0382933
2002-07-22	0.0225091	0.102853	0.0161198	0.0700489	0.131903	0.0352	0.115653	0.145875	0.0721482	0.0247051	0.036685	0.0327111	0.066025	0.0296177	0.122321	0.0069641	0.026166	0.047407	0.0156533	0.101436	0.0699958	0.0324193	0.0539648	0.29	0.0264098	0.00360923	0.00431545	0.0284267	0.00366667	0.0111778	0.0352667	0.0414661	0.0452286	0.027025	0.00299231	0.0147467	0.0924444	0.0393344	0.0159849	0.00656094	0.0258103	0.0366825	0.0714014	0.0890895	0.0575113	0.0567048	0.344444	0.0286884	0.0382933
2002-07-23	0.0225091	0.102853	0.0161198	0.0700489	0.131903	0.0352	0.115653	0.145875	0.0721482	0.0247051	0.036685	0.0327111	0.066025	0.0296177	0.122321	0.0065641	0.026166	0.047407	0.0156533	0.101436	0.0699958	0.0324193	0.0539648	0.29	0.0264098	0.00360923	0.00431545	0.0284267	0.00366667	0.0111778	0.0254889	0.0414661	0.0452286	0.027025	0.00299231	0.0147467	0.0924444	0.0393344	0.0159849	0.00656094	0.0206547	0.0366825	0.0714014	0.0890895	0.0575113	0.0567048	0.29	0.0286884	0.0382933
2002-07-24	0.0225091	0.102853	0.0161198	0.0695689	0.131903	0.0352	0.115653	0.117548	0.0721482	0.0247051	0.036685	0.0327111	0.066025	0.0109111	0.122321	0.0065641	0.00135617	0.047407	0.0156533	0.101436	0.0699958	0.0287927	0.0539648	0.29	0.0264098	0.00360923	0.00431545	0.0284267	0.00366667	0.0111778	0.0254889	0.0414661	0.0452286	0.027025	0.00299231	0.0147467	0.0924444	0.0393344	0.0159849	0.00656094	0.0192325	0.0366825	0.0714014	0.0890895	0.0575113	0.0567048	0.29	0.0286884	0.0382933
2002-07-25	0.0225091	0.102853	0.0161198	0.0695689	0.131251	0.0352	0.115653	0.117548	0.0721482	0.0204564	0.036685	0.0327111	0.066025	0.0109111	0.122321	0.0065641	0.00135617	0.0448017	0.0156533	0.101436	0.0699958	0.0287927	0.0539648	0.29	0.0264098	0.00360923	0.00375545	0.0284267	0.00366667	0.0111778	0.0254889	0.0414661	0.0452286	0.027025	0.00299231	0.0147467	0.0924444	0.0393344	0.0159849	0.00656094	0.0192325	0.0366825	0.0714014	0.0890895	0.0575113	0.0567048	0.29	0.0286884	0.0382933
2002-07-26	0.0225091	0.102853	0.0147567	0.0695689	0.131251	0.0322667	0.115653	0.117348	0.0721482	0.0204564	0.036685	0.0327111	0.066025	0.0109111	0.122321	0.0065641	0.00135617	0.0448017	0.000853333	0.101182	0.0699958	0.0287927	0.0539648	0.29	0.0264098	0.00360923	0.00375545	0.0284267	0.00366667	0.0111778	0.0254889	0.0414661	0.0452286	0.027025	0.00299231	0.0137689	0.0924444	0.0393344	0.0159849	0.00656094	0.0192325	0.0328825	0.0714014	0.0890895	0.0575113	0.0567048	0.29	0.0286884	0.0382933
2002-07-27	0.0225091	0.102853	0.0147567	0.0695689	0.127651	0.0322667	0.113703	0.115848	0.0721482	0.0204564	0.036685	0.0327111	0.066025	0.0109111	0.122321	0.0065641	0.00135617	0.0448017	0.000853333	0.0997273	0.0699958	0.0287927	0.0539648	0.29	0.0264098	0.00360923	0.00375545	0.0284267	0.00256667	0.0111778	0.0254889	0.0414661	0.0452286	0.010625	0.00299231	0.0137689	0.0924444	0.0393344	0.0147175	0.00656094	0.0192325	0.0328825	0.0714014	0.0890895	0.0575113	0.0567048	0.29	0.0286884	0.0382933
2002-07-28	0.0225091	0.102853	0.0147567	0.0445023	0.127651	0.0293333	0.113703	0.115848	0.0721482	0.0204564	0.036685	0.0327111	0.066025	0.00882222	0.122321	0.00597692	0.00135617	0.0448017	0.000853333	0.0997273	0.0699958	0.0287927	0.0442048	0.250667	0.0264098	0.00360923	0.00375545	0.0284267	0.00256667	0.0111778	0.0222889	0.0364661	0.0452286	0.010625	0.00261538	0.0137689	0.0924444	0.0393344	0.0147175	0.00656094	0.0192325	0.0328825	0.0714014	0.0890895	0.0575113	0.0567048	0.29	0.0286884	0.0382933
2002-07-29	0.0225091	0.102853	0.0147567	0.040887	0.114451	0.0293333	0.113703	0.115848	0.0721482	0.0204564	0.036685	0.0327111	0.066025	0.00882222	0.105121	0.00597692	0.00135617	0.0448017	0.000853333	0.0997273	0.0699958	0.0287927	0.0442048	0.250667	0.0264098	0.00360923	0.00375545	0.0284267	0.00256667	0.0111778	0.0222889	0.0364661	0.0452286	0.010625	0.00261538	0.0137689	0.0924444	0.0393344	0.0147175	0.00656094	0.0192325	0.0328825	0.0714014	0.0890895	0.0544713	0.0567048	0.29	0.0286884	0.0382933
2002-07-30	0.0235091	0.102853	0.0147567	0.040887	0.114451	0.0293333	0.113703	0.115848	0.0721482	0.0204564	0.036685	0.0327111	0.066025	0.00882222	0.105121	0.00597692	0.00135617	0.0448017	0.000853333	0.0842364	0.0699958	0.0287927	0.0442048	0.250667	0.0264098	0.00360923	0.00369485	0.0284267	0.00256667	0.0111778	0.0222889	0.0364661	0.0452286	0.010625	0.00261538	0.0137689	0.0924444	0.0393344	0.0147175	0.00656094	0.0192325	0.0328825	0.0714014	0.0890895	0.0544713	0.0567048	0.29	0.0286884	0.0382933
2002-07-31	0.0235091	0.102853	0.0147567	0.040887	0.114451	0.0293333	0.111303	0.115848	0.0721482	0.0202538	0.036685	0.0327111	0.066025	0.00882222	0.104933	0.00597692	0.00135617	0.0448017	0.000853333	0.0367091	0.0699958	0.0287927	0.0442048	0.250667	0.0264098	0.00360923	0.00365485	0.0284267	0.00256667	0.0111778	0.00528889	0.0364661	0.0452286	0.010625	0.00261538	0.0137689	0.0924444	0.0393344	0.0147175	0.00656094	0.0192325	0.0328825	0.0714014	0.0890895	0.0544713	0.0567048	0.29	0.0286884	0.0382933
2002-08-01	0.0235091	0.102453	0.0146484	0.039913	0.114451	0.0293333	0.11064	0.113537	0.0721482	0.0202538	0.036685	0.0327111	0.066025	0.00846667	0.104933	0.00597692	0.00135617	0.0448017	0.000853333	0.0365455	0.0699958	0.0287927	0.0442048	0.250667	0.0264098	0.00360923	0.00365485	0.0284267	0.00256667	0.0111778	0.00528889	0.0364661	0.0452286	0.010625	0.00261538	0.0137689	0.0895111	0.0393344	0.0147175	0.00647205	0.0192325	0.0328825	0.0714014	0.0890895	0.0544713	0.0567048	0.29	0.0286884	0.0382933
2002-08-02	0.0235091	0.101973	0.0146484	0.039913	0.110985	0.0293333	0.11064	0.113537	0.0721482	0.0202026	0.036685	0.0327111	0.066025	0.00830794	0.104933	0.00597692	0.00135617	0.0448017	0.000853333	0.0247091	0.0699958	0.0287927	0.0442048	0.250667	0.0264098	0.00356923	0.00365485	0.0284267	0.00256667	0.0111778	0.00528889	0.0364661	0.0452286	0.010625	0.00261538	0.0137689	0.0895111	0.0393344	0.0147175	0.00647205	0.0192325	0.0328825	0.0714014	0.0890895	0.0544713	0.0567048	0.29	0.0286884	0.0382933
2002-08-03	0.0235091	0.101973	0.0146484	0.033753	0.0215179	0.0269333	0.110531	0.113537	0.0721482	0.0202026	0.036685	0.0327111	0.066025	0.00830794	0.104933	0.00597692	0.00135617	0.0448017	0.000853333	0.0247091	0.0699958	0.0287607	0.0442048	0.250667	0.0264098	0.00356923	0.00365485	0.0284267	0.00256667	0.0111778	0.00528889	0.0364661	0.0452286	0.008575	0.00261538	0.0137689	0.0895111	0.0393344	0.00495193	0.00647205	0.0192325	0.0328825	0.0714014	0.0703212	0.0544713	0.0541685	0.29	0.0286884	0.0382933
2002-08-04	0.0234182	0.101973	0.0143401	0.0332288	0.0215179	0.0137333	0.110531	0.113537	0.0721482	0.0202026	0.036685	0.0327111	0.066025	0.00830794	0.104933	0.00597692	0.00135617	0.0448017	0.000853333	0.0247091	0.0699958	0.0287607	0.0442048	0.250667	0.0261098	0.00356923	0.00365485	0.0284267	0.00256667	0.0111778	0.00528889	0.0364661	0.0452286	0.008575	0.00261538	0.0137689	0.0895111	0.0393344	0.00495193	0.00647205	0.0192325	0.0328825	0.0714014	0.0703212	0.0370593	0.0541685	0.29	0.0286884	0.0382933
2002-08-05	0.0234182	0.101733	0.0143401	0.0319088	0.0210462	0.0137333	0.110531	0.0579372	0.0721482	0.0201436	0.036685	0.0327111	0.066025	0.00566667	0.104933	0.00597692	0.000111722	0.0448017	0.000853333	0.0247091	0.0699958	0.0284453	0.0442048	0.250667	0.0261098	0.00356923	0.00365485	0.0284267	0.00256667	0.0111778	0.00528889	0.0364661	0.0452286	0.008075	0.00261538	0.0137689	0.0895111	0.0393344	0.00495193	0.00647205	0.0192325	0.0327111	0.0714014	0.0703212	0.0370593	0.0541685	0.29	0.0286884	0.0382933
2002-08-06	0.0234182	0.101733	0.0143401	0.0319088	0.0121128	0.0137333	0.110531	0.0579372	0.0721482	0.0201436	0.036685	0.0327111	0.066025	0.00255556	0.104933	0.0058	0.000111722	0.0448017	0.000773333	0.00138182	0.0281128	0.0284453	0.0442048	0.250667	0.0261098	0.00356923	0.00196303	0.0284267	0.00256667	0.0111778	0.00528889	0.0364661	0.0452286	0.008075	0.00261538	0.0137689	0.0895111	0.0393344	0.0048186	0.00647205	0.0192325	0.0327111	0.0714014	0.0703212	0.0324193	0.0528685	0.29	0.0286884	0.0382933
2002-08-07	0.0234182	0.101733	0.0143401	0.0242232	0.0121128	0.0137333	0.110531	0.0579372	0.0721482	0.0201436	0.036685	0.0327111	0.066025	0.00255556	0.0706667	0.00246667	0.000111722	0.0448017	0.000773333	0.000327273	0.0281128	0.0284453	0.0442048	0.250667	0.0261098	0.00356923	0.00196303	0.0284267	0.00256667	0.0111778	0.00528889	0.0364661	0.0387841	0.00675	0.00261538	0.013277	0.0878333	0.0393344	0.0048186	0.00647205	0.0192325	0.0327111	0.0714014	0.0703212	0.0324193	0.0528685	0.29	0.0286884	0.0382933
2002-08-08	0.0234182	0.101733	0.0143401	0.0242232	0.0121128	0.0137333	0.110531	0.0579372	0.0721482	0.0201436	0.036685	0.0327111	0.066025	0.00255556	0.0706667	0.00246667	0.000111722	0.0260334	0.000773333	0.000327273	0.0281128	0.0284453	0.0440448	0.250667	0.0261098	0.00356923	0.00196303	0.00032	0.00256667	0.0111778	0.00528889	0.0364661	0.0378635	0.00675	0.00261538	0.00187704	0.0878333	0.0393344	0.0048186	0.00647205	0.0192325	0.0327111	0.0714014	0.0703212	0.0324193	0.0514285	0.29	0.0286884	0.0382933
2002-08-09	0.0234182	0.101733	0.0143401	0.0242232	0.0121128	0.0137333	0.110531	0.0579372	0.0721482	0.0201436	0.036635	0.0327111	0.0659625	0.00255556	0.0706667	0.00246667	0.000111722	0.0260334	0.000773333	0.000327273	0.0281128	0.0284453	0.0440448	0.250667	0.0261098	0.00356923	0.00196303	0.00032	0.00256667	0.0111778	0.00528889	0.0364661	0.023254	0.00675	0.00261538	0.00187704	0.0878333	0.0393344	0.0048186	0.00647205	0.0192325	0.0327111	0.0714014	0.0703212	0.0324193	0.0514285	0.29	0.0286884	0.0382933
2002-08-10	0.0234182	0.101733	0.0138258	0.0242232	0.0121128	0.0137333	0.110515	0.0579372	0.0721482	0.0201436	0.036635	0.0327111	0.0649	0.00255556	0.0706667	0.00246667	0.000111722	0.0260334	0.000773333	0.000327273	0.0281128	0.0284453	0.0440448	0.250667	0.0261098	0.00356923	0.00196303	0.00032	0.00256667	0.0111778	0.00528889	0.0364661	0.023254	0.00675	0.00261538	0.00187704	0.0653	0.0393344	0.0048186	0.00635084	0.0192325	0.0327111	0.0714014	0.0703212	0.0324193	0.0514285	0.29	0.0286884	0.0382933
2002-08-11	0.0234182	0.101733	0.0138258	0.0227898	0.00882051	0.0137333	0.110515	0.0579372	0.0721482	0.0201436	0.0365915	0.0327111	0.0649	0.00255556	0.0706667	0.00246667	0	0.0260334	0.000773333	0.000327273	0.0281128	0.0284453	0.0440448	0.250667	0.0261098	0.00356923	0.00196303	0.00032	0.00256667	0.0111778	0.00528889	0.0364661	0.023254	0.00675	0.00291538	0.00187704	0.0653	0.0393344	0.0048186	0.00635084	0.0192325	0.0327111	0.0714014	0.0703212	0.0324193	0.0514285	0.29	0.0286884	0.0382933
2002-08-12	0.0234182	0.101733	0.0138258	0.0227898	0.00882051	0.0134667	0.110515	0.0579372	0.0721482	0.0201436	0.0365915	0.0327111	0.0649	0.00255556	0.0706667	0.00246667	0	0.0260334	0.000773333	0.000327273	0.0281128	0.0284453	0.0440448	0.250667	0.0261098	0.00356923	0.00196303	0.00032	0.00256667	0.0111778	0.00528889	0.0364661	0.023254	0.00675	0.00291538	0.00187704	0.0653	0.0393344	0.0048186	0.00635084	0.0192325	0.0327111	0.0714014	0.0505879	0.0324193	0.0514285	0.29	0.0286884	0.0382933
2002-08-13	0.0204182	0.0979733	0.0137925	0.0224298	0.00882051	0.0134667	0.111215	0.0579372	0.0721482	0.0201436	0.0365915	0.0327111	0.0649	0.00255556	0.0706667	0.00246667	0	0.0260334	0.000773333	0.000327273	0.0330017	0.0207487	0.0415085	0.250667	0.0261098	0.00356923	0.00196303	0.00032	0.00256667	0.0111778	0.00528889	0.0364661	0.023254	0.00675	0.00291538	0.00187704	0.0653	0.0393344	0.0048186	0.00635084	0.0192325	0.0327111	0.0714014	0.0246286	0.0324193	0.0514285	0.29	0.0286884	0.0382933
2002-08-14	0.0204182	0.0979733	0.0137925	0.0221365	0.00882051	0.0133333	0.111215	0.0449965	0.0721482	0.0201436	0.0365915	0.0327111	0.0649	0.00255556	0.0706667	0.00246667	0	0.0260334	0.000773333	0.000327273	0.0330017	0.0207487	0.0415085	0.250667	0.0261098	0.00356923	0.00196303	0.00032	0.00256667	0.0111778	0.00528889	0.0308328	0.023254	0.00675	0.00291538	0.00187704	0.0653	0.0393344	0.0048186	0.00635084	0.0192325	0.0327111	0.0714014	0.0246286	0.0324193	0.0514285	0.29	0.0286884	0.0382933
2002-08-15	0.0190182	0.0976533	0.0119056	0.0213365	0.00882051	0.0133333	0.111215	0.0449965	0.0706244	0.0200769	0.0365915	0.0327111	0.06395	0.00255556	0.0465333	0.000666667	0	0.0260334	0.000773333	0.000327273	0.0330017	0.0207487	0.0415085	0.250667	0.0261098	0.00356923	0.00196303	0.00032	0.00256667	0.0111778	0.00528889	0.0257864	0.023254	0.00675	0.00291538	0.00187704	0.0653	0.0393344	0.0048186	0.00635084	0.0192325	0.0327111	0.0714014	0.0246286	0.0287927	0.0514285	0.29	0.0286884	0.0382933
2002-08-16	0.0190182	0.0976533	0.0119056	0.0213365	0.00882051	0.0133333	0.111215	0.0449965	0.0706244	0.0200769	0.0363944	0.0327111	0.06395	0.00255556	0	0.000666667	0	0.0260334	0.000773333	0.000327273	0.0330017	0.000322	0.0415085	0.250667	0.0261098	0.00356923	0.00158485	0.00032	0.00256667	0.0111778	0.00488889	0.0252364	0.023254	0.00675	0.00291538	0.00187704	0.0653	0.0393344	0.00461439	0.00635084	0.0192325	0.0327111	0.0714014	0.0246286	0.0287927	0.0514285	0.29	0.0286884	0.0382933
2002-08-17	0.0190182	0.0976533	0.00613889	0.0213365	0.00882051	0.0133333	0.111215	0.0449965	0.0706244	0.0200769	0.0363944	0.0327111	0.06395	0.00255556	0	0.000666667	0	0.0260334	0.000773333	0.000327273	0.0330017	0.000322	0.0415085	0.250667	0.0261098	0.00356923	0.00158485	0.00032	0.00256667	0.0111778	0.00488889	0.0252364	0.023254	0.00675	0.00291538	0.0229067	0.0653	0.0393344	0.00461439	0.00635084	0.0192325	0.0327111	0.0714014	0.0246286	0.021096	0.0514285	0.29	0.0286884	0.0382933
2002-08-18	0.0190182	0.0976533	0.00613889	0.0213365	0.00882051	0.0133333	0.111215	0.0449965	0.0706244	0.0200769	0.0351944	0.0327111	0.06395	0.00255556	0	0.000666667	0	0.0260334	0.000773333	0.000327273	0.0330017	0.000322	0.0415085	0.250667	0.0261098	0.00356923	0.00158485	0.00032	0.00256667	0.0110444	0.00488889	0.0252364	0.023254	0.00675	0.00291538	0.0229067	0.0653	0.0393344	0.00461439	0.00635084	0.0192325	0.0327111	0.0714014	7.40741e-05	0.021096	0.0514285	0.29	0.0286884	0.0382933
2002-08-19	0.0190182	0.0976533	0.00613889	0.0174165	0.00882051	0.0133333	0.111215	0.0449965	0.0705578	0.0182205	0.0351944	0.0327111	0.06395	0.00255556	0	0.000666667	0	0.0260334	0.000773333	0.000327273	0.0330017	0.000322	0.0415085	0.250667	0.0261098	0.00356923	0.00158485	0.00032	0.00256667	0.0110444	0.00488889	0.0117864	0.023254	0.00675	0.00131538	0.0229067	0.0653	0.0393344	0.00461439	0.00635084	0.0190991	0.0327111	0.0714014	7.40741e-05	0.021096	0.0416685	0.250667	0.0286884	0.0382933
2002-08-20	0.0190182	0.0976533	0.00613889	0.0174165	0.00882051	0.0133333	0.111215	0.0449965	0.0705578	0.0182205	0.0351944	0.0327111	0.06395	0.00255556	0	0.000666667	0	0.0260334	0.000773333	0.000327273	0.0330017	0.000322	0.0415085	0.0951111	0.0261098	0.00356923	0.00158485	0.00032	0.00256667	0.0110444	0.00488889	0.0117864	0.0231175	0.00675	0.000776923	0.0229067	0.0653	0.0393344	0.00461439	0.00635084	0.0190991	0.0327111	0.0712139	7.40741e-05	0.021096	0.0416685	0.250667	0.0286884	0.0382933
2002-08-21	0.0190182	0.0973733	0.00613889	0.0167618	0.00882051	0.0133333	0.110866	0.0442965	0.0705578	0.0182205	0.0351944	0.0327111	0.063925	0.000111111	0	0.000666667	0	7.40741e-05	0.000773333	0.000327273	0.0330017	0.000322	0.0415085	0.0951111	0.0261098	0.00356923	0.00158485	0.00032	0.00256667	0.0110444	0.00488889	0.0117864	0.0231175	0.00675	0.000776923	0.0229067	0.0653	0.0191258	0.00461439	0.00635084	0.0190991	0.0327111	0.0712139	7.40741e-05	0.021096	0.0416685	0.250667	0.0286884	0.0382933
2002-08-22	0.0172909	0.0973733	0.00613889	0.0167618	0.00882051	0.0133333	0.115043	0.0442965	0.0705578	0.0182205	0.0351944	0.0326667	0.0637	0.000111111	0	0.000666667	0	7.40741e-05	0.000533333	0.000327273	0.0330017	0.000322	0.0415085	0.0951111	0.0261098	0.00356923	0.00158485	0.00032	0.00256667	0.0110444	0.00488889	0.0117864	0.0215175	0.00675	0.000776923	0.0229067	0.0653	0.0191258	0.00461439	0.00635084	0.0190991	0.0324444	0.0712139	7.40741e-05	0.021096	0.0416685	0.250667	0.0286884	0.0382933
2002-08-23	0.0172909	0.0973733	0.00613889	0.0167618	0.00882051	0.0133333	0.113228	0.0419465	0.0705578	0.0182205	0.0351944	0.0326667	0.0637	0.000111111	0	0.000666667	0	7.40741e-05	0.000533333	0.000327273	0.0330017	0.000322	0.0255943	0.0951111	0.0261098	0.00356923	0.00158485	0.00032	0.0177667	0.0110444	0.00415556	0.0117864	0.0212889	0.005	0.000776923	0.0229067	0.0653	0.0191258	0.00461439	0.00635084	0.0190991	0.0314444	0.0712139	7.40741e-05	0.021096	0.0416685	0.250667	0.0286884	0.0382933
2002-08-24	0.0172909	0.0973733	0.00606389	0.0163618	0.00882051	0.0133333	0.113228	0.0419465	0.0705578	0.0182205	0.0351944	0.0326667	0.0637	0.000111111	0	0.000666667	0	7.40741e-05	0.000533333	0.000327273	0.0330017	0.000322	0.0255943	0.0951111	0.0261098	0.00356923	0.00158485	0.00032	0.0177667	0.0110444	0.00415556	0.0117864	0.0212889	0.005	0.000776923	0.021403	0.0653	0.0191258	0.00381439	0.00635084	0.0190991	0.0314444	0.0712139	7.40741e-05	0.021096	0.0257543	0.250667	0.0286884	0.0382933
2002-08-25	0.0224909	0.0973733	0.00573532	0.0159575	0.00882051	0.0133333	0.109789	0.0419465	0.0705578	0.0182205	0.0351944	0.0326667	0.0637	0.000111111	0	0.000666667	0	7.40741e-05	0.000533333	0.000327273	0.0330017	0.000322	0	0	0.0261098	0.00356923	0.00158485	0.00032	0.0177667	0.0110444	0.00415556	0.0117864	0.0183873	0.005	0.000776923	0.021403	0.0653	0.0191258	0.00381439	0.00635084	0.0177556	0.0314444	0.0712139	7.40741e-05	0.021096	0.0257543	0.250667	0.0286884	0.0382933
2002-08-26	0.0224909	0.0973733	0.00516984	0.0159575	0.00882051	0.0133333	0.109789	0.0419465	0.0705578	0.0182205	0.0351944	0.0242667	0.0585	0.000111111	0	0.000666667	0	7.40741e-05	0.000533333	0.000327273	0.0330017	0.000322	0	0	0.0261098	0.00356923	0.00121364	0.00032	0.0173222	0.0110444	0.00415556	0.0117864	0.0183873	0.005	0.000776923	0.021403	0.0563667	0.0191258	0.00381439	0.00635084	0.0177556	0.0314444	0.0712139	7.40741e-05	0.021096	0.0257543	0.0951111	0.0286884	0.0382933
2002-08-27	0.0224909	0.0971333	0.00516984	0.00955754	0.00882051	0.0133333	0.109789	0.0419465	0.0705578	0.0182205	0.0351944	0.0242667	0.0585	0.000111111	0	0.000666667	0	7.40741e-05	0.000133333	0.000327273	0.0330017	0.000322	0	0	0.0248027	0.00356923	0.00121364	0.00032	0.0173222	0.0110444	0.00415556	0.0117864	0.0183873	0.005	0.000776923	0.021403	0.0563667	0.0191258	0.00329298	0.00628418	0.0177556	0.0314444	0.0712139	7.40741e-05	0.000669333	0.0257543	0.0951111	0.0286884	0.0382933
2002-08-28	0.0224909	0.0971333	0.00516984	0.00955754	0.00882051	0.0133333	0.106586	0.0419465	0.0705578	0.0182205	0.0351944	0.0242667	0.0585	0.000111111	0	0.0003	0	7.40741e-05	0.000133333	0.000327273	0.0330017	0.000322	0	0	0.0248027	0.00356923	0.00121364	0.00032	0.0173222	0.0110444	0.00415556	0.0117864	0.0183873	0.005	0.0003	0.021403	0.0563667	0.0191258	0.00329298	0.00628418	0.0177556	0.0314444	0.0712139	7.40741e-05	0.000669333	0.0257543	0.0951111	0.0286884	0.0382933
2002-08-29	0.0224909	0.0971333	0.00300317	0.00913088	0.00882051	0.0133333	0.106586	0.0419465	0.0705578	0.0181692	0.0351944	0.0242667	0.0585	0.000111111	0	0.0003	0	7.40741e-05	0.000133333	0.000327273	0.0330017	0.000322	0	0	0.0248027	0.00356923	0.00121364	0.00032	0.0173222	0.0110444	0.00415556	0.0117864	0.0183873	0.005	0.0003	0.021403	0.0563667	0.0191258	0.00329298	0.00628418	0.0177556	0.0314444	0.0712139	7.40741e-05	0.000669333	0.0257543	0.0951111	0.0286884	0.0382933
2002-08-30	0.0224909	0.0971333	0.00300317	0.00913088	0.00882051	0.0133333	0.106586	0.0419465	0.0720816	0.0181692	0.0351944	0.0242667	0.0585	0.000111111	0	0.0003	0	7.40741e-05	0.000133333	0.000327273	0.0330017	0.000322	0	0	0.0247455	0.00356923	0.00121364	0.00032	0.0173222	0.0110444	0.00415556	0.0174197	0.0183873	0.005	0.0003	0.021403	0.0563667	0.0191258	0.00329298	0.00628418	0.0177556	0.0314444	0.0712139	7.40741e-05	0.000637333	0.0257543	0.0951111	0.0286884	0.0101867
2002-08-31	0.0224909	0.0971333	0.00300317	0.00913088	0.00882051	0.0133333	0.106586	0.0419465	0.0720816	0.0181692	0.00409441	0.0242667	0.0585	0.000111111	0	0.0003	0	7.40741e-05	0.000133333	3.63636e-05	0.0330017	0.000322	0	0	0.0247455	0.00356923	0.00121364	0.00032	0.0184222	0.00784444	0.00415556	0.0174197	0.0183873	0.005	0.0003	0.021403	0.0563667	0.000125758	0.00288877	0.00628418	0.0177556	0.0314444	0.0712139	7.40741e-05	0.000637333	0.0257543	0.0951111	0.0286884	0.0101867
2002-09-01	0.0202909	0.0971333	0.00300317	0.00913088	0.00882051	0.0133333	0.106586	0.0419465	0.0720816	0.0181692	0.00409441	0.0242667	0.0585	0.000111111	0	0.0001	0	7.40741e-05	0.000133333	3.63636e-05	0.0330017	0.000322	0	0	0.0247455	0.00356923	0.00121364	0.00032	0.0184222	0.00784444	0.00111111	0.0174197	0.0183873	0.005	0.0003	0.021403	0.0563667	0.000125758	0.00288877	0.00628418	0.0177556	0.0314444	0.0712139	7.40741e-05	0.000637333	0.0257543	0.0951111	0.0286884	0.0101867
2002-09-02	0.0202909	0.0971333	0.00300317	0.00913088	0.00882051	0.0133333	0.105172	0.0419465	0.0720816	0.0181692	0.00409441	0.0242667	0.0585	0.000111111	0	0.0001	0	7.40741e-05	0.000133333	0.00459394	0.0330017	0.004962	0	0	0.0247455	0.0032	0.00121364	0.00032	0.0184222	0.00784444	0.00111111	0.0174197	0.0183873	0.005	0.0003	0.021403	0.0550667	0.000125758	0.00288877	0.00628418	0.0177556	0.0314444	0.0712139	7.40741e-05	0.000637333	0.0255943	0.0951111	0.0286884	0.0101867
2002-09-03	0.0202909	0.0971333	0.00300317	0.00913088	0.00370256	0.0133333	0.105172	0.0419465	0.0720816	0.0181692	0.00409441	0.0242667	0.0585	0.000111111	0	0.0001	0	7.40741e-05	0.000133333	0.00459394	0.0330017	0.004962	0	0	0.0247455	0.0032	0.00121364	0.00032	0.0184222	0.00784444	0.00111111	0.0174197	0.0183873	0.005	0.0003	0.021403	0.0550667	0.000125758	0.00288877	0.00628418	0.0177556	0.0313944	0.0712139	7.40741e-05	0.000637333	0	0.0951111	0.0273812	0.0101867
2002-09-04	0.0202909	0.0971333	0.00300317	0.00913088	0.00370256	0.0133333	0.105172	0.0419465	0.0720816	0.0181692	0.00409441	0.0242667	0.0585	0.000111111	0	0.0001	0	7.40741e-05	0.000133333	0.00459394	0.0330017	0.004962	0	0	0.0247455	0.0032	0.00121364	0.00032	0.0184222	0.00784444	0.00111111	0.0174197	0.0183873	0.005	0.0003	0.021403	0.0550667	0.000125758	0.00288877	0.00628418	0.0177556	0.0313944	0.0712139	7.40741e-05	0.00394867	0	0.0951111	0.0273812	0.0101867
2002-09-05	0.0202909	0.0971333	0.00284127	0.00561088	0.00370256	0.0133333	0.105172	0.0419465	0.0720816	0.0181692	0.00409441	0.0242667	0.0585	0.000111111	0	0.0001	0	7.40741e-05	0.000133333	0.00459394	0.0330017	0.004962	0	0	0.0247455	0.0032	0.00121364	0.00032	0.0312222	0.00784444	0.00111111	0.0149697	0.0183873	0.005	0.0003	0.021403	0.0550667	0.000125758	0.00288877	0.00628418	0.0177556	0.0313944	0.0712139	7.40741e-05	0.00394867	0	0.0951111	0.0273812	0.0101867
2002-09-06	0.0202909	0.0924133	0.00284127	0.00561088	0.0036	0.0133333	0.105172	0.0419465	0.0720816	0.0181692	0.00409441	0.0242667	0.0585	0.000111111	0	0.0001	0	7.40741e-05	0.000133333	0.00459394	0.0330017	0.004962	0	0	0.0247455	0.0032	0.00121364	0.00032	0.0312222	0.00784444	0.00111111	0.0169697	0.00964444	0.005	0.0003	0.021403	0.0550667	0.000125758	0.00288877	0.00628418	0.0157556	0.0313944	0.0712139	7.40741e-05	0.00394867	0	0.0951111	0.0273812	0.0101867
2002-09-07	0.0202909	0.0924133	0.00284127	0.00561088	0.0036	0.0133333	0.106988	0.0419465	0.0720816	0.0181692	0.00409441	0.0242667	0.0578375	0.000111111	0	0.0001	0	7.40741e-05	0.000133333	0.00459394	0.0330017	0.004962	0	0	0.0247455	0.0032	0.00121364	0.00032	0.0312222	0.00784444	0.00111111	0.0169697	0.00964444	0.005	0.0003	0.021403	0.0550667	0.000125758	0.00288877	0.00628418	0.0157556	0.0313944	0.0712139	7.40741e-05	0.00394867	0	0.0951111	0.0273812	0.0101867
2002-09-08	0.0202909	0.0924133	0.00284127	0.00561088	0.0036	0.0133333	0.106988	0.0419465	0.0723223	0.0181692	0.00409441	0.0242667	0.0578375	0.000111111	0	0.0001	0	7.40741e-05	0.000133333	0.00459394	0.0330017	0.00858867	0	0	0.00564552	0.0032	0.00121364	0.00032	0.0312222	0.00784444	0.00111111	0.0169697	0.00964444	0.005	0.0003	0.021403	0.0550667	0.000125758	0.00288877	0.00628418	0.0157556	0.0313944	0.0470805	7.40741e-05	0.00394867	0	0.0951111	0.0273812	0.0101867
2002-09-09	0.0202909	0.0924133	0.00284127	0.00491754	0.0036	0.0133333	0.106988	0.0419465	0.0723223	0.0181692	0.00409441	0.0239111	0.0587875	0.000111111	0	0.0019	0	7.40741e-05	0.000133333	0.00459394	0.0330017	0.00858867	0	0	0.00564552	0.0032	0.00121364	0.00032	0.0312222	0.00784444	0.00111111	0.0169697	0.00964444	0.005	0.0003	0.021403	0.0550667	0.000125758	0.00267544	0.00628418	0.0157556	0.0313944	0.000547186	7.40741e-05	0.00394867	0	0.0951111	0.0273812	0.0101867
2002-09-10	0.0202909	0.0924133	0.00284127	0.00491754	0.0036	0.0133333	0.115521	0.0419465	0.0723223	0.0181692	0.00409441	0.0239111	0.0587875	0.000111111	0	0.0019	0	7.40741e-05	0.000133333	0.00459394	0.0330017	0.00858867	0	0	0.00564552	0.0032	0.00121364	0.00032	0.0311889	0.00784444	0.00111111	0.0169697	0.00964444	0.005	0.0003	0.021403	0.0550667	0.000125758	0.00267544	0.00628418	0.0157556	0.0313944	0.000547186	7.40741e-05	0.00394867	0	0.0951111	0.0273812	0.0101867
2002-09-11	0.0202909	0.0924133	0.00284127	0.00543895	0.0036	0.0133333	0.117636	0.0407761	0.0723223	0.0181692	0.00409441	0.0239111	0.0587875	0.000111111	0	0.0019	0	7.40741e-05	0.000133333	0.00459394	0.0330017	0.00858867	0	0	0.00564552	0.0032	0.00121364	0.00032	0.0311889	0.00784444	0.00111111	0.0169697	0.00964444	0.005	0.0003	0.021403	0.0550667	0.000125758	0.00267544	0.00628418	0.0157043	0.0313944	0.000547186	7.40741e-05	0.00394867	0	0.0951111	0.0273812	0.0101867
2002-09-12	0.0202909	0.0923333	0.00284127	0.00575895	0.0036	0.0133333	0.114803	0.0382761	0.0723223	0.0181692	0.00409441	0.0239111	0.0237875	0	0	0.0019	0	7.40741e-05	0.000133333	0.00459394	0.084835	0.00858867	0	0	0.00564552	0.0032	0.0187336	0.00032	0.0311889	0.00784444	0.00111111	0.0169697	0.00183492	0.005	0.0003	0.021403	0.0550667	0.000125758	0.00267544	0.00628418	0.0157043	0.0313944	0.000547186	7.40741e-05	0.00394867	0	0.0951111	0.0273812	0.0101867
2002-09-13	0.0202909	0.0923333	0.00284127	0.0171151	0.0036	0.0133333	0.114803	0.0382761	0.0723223	0.0181692	0.00409441	0.0239111	0.0237875	0	0	0.00248718	0	7.40741e-05	0.000133333	0.00459394	0.105119	0.00858867	0	0	0.00564552	0.0032	0.051747	0.00032	0.0311889	0.00784444	0.0115778	0.0169697	0.00183492	0.005	0.000676923	0.021403	0.0550667	0.000125758	0.00231544	0.00628418	0.0157043	0.0313944	0.000547186	7.40741e-05	0.00858867	0	0.0951111	0.00828123	0.0101867
2002-09-14	0.0203818	0.0923333	0	0.0171151	0.0036	0.0133333	0.114803	0.0382761	0.0723223	0.0181692	0.00409441	0.0239111	0.0237875	0	0	0.00248718	0	7.40741e-05	0.000133333	0.00459394	0.105119	0.00858867	0	0	0.00564552	0.0032	0.051747	0.00032	0.0311222	0.00784444	0.0117111	0.0169697	0.00183492	0.005	0.000676923	0.0223141	0.0550667	0.000125758	0.00231544	0.00628418	0.0157043	0.0313944	0.000547186	7.40741e-05	0.00858867	0	0.0951111	0.00798123	0.0101867
2002-09-15	0.0203818	0.0923333	0	0.0185485	0.0036	0.0133333	0.114803	0.0382761	0.0723223	0.0181692	0.00409441	0.0239111	0.0237875	0	0	0.00808718	0	7.40741e-05	0.000133333	0.00459394	0.105119	0.00858867	0	0	0.00564552	0.0032	0.051747	0.00032	0.0311222	0.00784444	0.0117111	0.0169697	0.00183492	0.005	0.000676923	0.0223141	0.0550667	0.000125758	0.00231544	0.00628418	0.0152504	0.0313944	0.000547186	7.40741e-05	0.0237353	0	0.0951111	0.00798123	0.00698667
2002-09-16	0.0203818	0.0923333	0	0.0185485	0.0036	0.0133333	0.114803	0.0221539	0.0723223	0.0181692	0.00409441	0.0239111	0.0214875	0	0	0.00808718	0	7.40741e-05	0.000133333	0.00459394	0.105119	0.00858867	0	0	0.00564552	0.0032	0.062467	0.00032	0.0311222	0.00784444	0.0117111	0.0169697	0.00183492	0.005	0.000676923	0.0223141	0.0550667	0.000125758	0.00263544	0.00628418	0.0152504	0.0313944	0.000547186	7.40741e-05	0.0237353	0	0.0951111	0.00798123	0.00698667
2002-09-17	0.0463818	0.0923333	0	0.0185485	0.00413333	0.0150667	0.116433	0.0221539	0.0723223	0.0161692	0.00409441	0.0239111	0.0214875	0	0	0.00808718	0	7.40741e-05	0.00813333	0.00459394	0.105119	0.0237353	0	0	0.00564552	0.0405133	0.062467	0.00032	0.0311222	0.00784444	0.0117111	0.0169697	0.00183492	0.005	0.000676923	0.0223141	0.058	0.000125758	0.00263544	0.00628418	0.0152504	0.0313944	0.000547186	4.44444e-05	0.0237353	0	0.0951111	0.00792409	0.00698667
2002-09-18	0.117482	0.0923333	0	0.0180685	0.00413333	0.0150667	0.116433	0.0221539	0.0776239	0.0161692	0.00409441	0.0239111	0.0214875	0	0	0.00808718	0	7.40741e-05	0.00813333	0.00459394	0.107098	0.0237353	0	0	0.00564552	0.0405133	0.0706439	0.00032	0.0311889	0.00784444	0.0118444	0.0169697	0.00183492	0.005	0.000676923	0.0359259	0.058	0.000125758	0.00300877	0.00628418	0.0152504	0.0313944	0.000547186	4.44444e-05	0.0237353	0	0.0951111	0.00792409	0.00698667
2002-09-19	0.117482	0.0923333	0	0.0180685	0.00413333	0.0150667	0.0935328	0.0221539	0.0776239	0.0161692	0.00409441	0.0239111	0.0214875	0	0	0.00808718	9.52381e-05	7.40741e-05	0.00813333	0.00459394	0.107098	0.0237353	0	0	0.00564552	0.0405133	0.0706439	0.00032	0.0311889	0.00784444	0.0150444	0.0307485	0.00183492	0.005	0.000676923	0.0365185	0.058	0.000125758	0.00300877	0.00628418	0.0153838	0.0313944	0.000547186	4.44444e-05	0.0237353	0	0.0951111	0.00792409	0.00698667
2002-09-20	0.120482	0.0923333	0	0.0193885	0.00413333	0.0150667	0.0935328	0.0221539	0.0776239	0.0161692	0.00409441	0.0239111	0.0214875	0	0	0.00808718	9.52381e-05	7.40741e-05	0.00821333	0.012497	0.115911	0.0237353	0	0	0.00564552	0.0405133	0.0723358	0.00032	0.0311889	0.00784444	0.0150444	0.0441985	0.00183492	0.00185	0.000676923	0.0365185	0.0565444	0.000125758	0.00300877	0.00628418	0.0153838	0.0313944	0.000547186	4.44444e-05	0.0237353	0	0	0.00792409	0.00698667
2002-09-21	0.120482	0.0923333	0	0.0193885	0.00413333	0.0150667	0.0935328	0.0351802	0.0776239	0.0162026	0.00409441	0.0239111	0.0216875	0.00264127	0	0.00808718	0.00133968	0.000355556	0.00821333	0.0135515	0.115911	0.0267753	0	0	0.00564552	0.0850733	0.0754291	0	0.0311889	0.00784444	0.0150444	0.0441985	0.00183492	0.00185	0.000676923	0.0365185	0.0565444	0.000125758	0.00300877	0.00628418	0.0153838	0.0313944	0.000547186	4.44444e-05	0.0267753	0	0	0.00792409	0.00698667
2002-09-22	0.120482	0.0923333	0.000514286	0.0193885	0.00413333	0.0150667	0.0935328	0.0351802	0.0776239	0.00858034	0.00409441	0.0239111	0.0216875	0.00264127	0	0.00808718	0.00133968	0.000355556	0.0433867	0.0135515	0.115911	0.0267753	0	0	0.00564552	0.0850733	0.0754291	0	0.0311889	0.00784444	0.0150444	0.0441985	0.0105778	0.00185	0.000676923	0.0365185	0.0565444	0.000125758	0.00353018	0.00628418	0.0153838	0.0313944	0.000547186	4.44444e-05	0.0267753	0	0	0.00792409	0.00698667
2002-09-23	0.133882	0.0923333	0.000514286	0.0193885	0.00413333	0.0304	0.0927328	0.031358	0.0776239	0.00858034	0.00409441	0.0147111	0.0696875	0.00264127	0	0.00808718	0.00133968	0.000355556	0.0537867	0.0135515	0.115911	0.0267753	0	0	0.00564552	0.0850733	0.0916158	0	0.0311889	0.00784444	0.0150444	0.0441985	0.00887619	0.00185	0.000676923	0.0365185	0.0565444	0.000125758	0.00353018	0.00628418	0.0153838	0.0313944	0.000547186	4.44444e-05	0.0267753	0	0	0.00792409	0.00698667
2002-09-24	0.133882	0.0922533	0.000514286	0.0193885	0.00413333	0.0304	0.0927328	0.031358	0.0776239	0.00858034	0.00409441	0.0147111	0.0696875	0.00264127	0	0.0112872	0.00133968	0.000355556	0.0537867	0.0278303	0.115911	0.0267753	0	0	0.0247455	0.0850733	0.0930558	0	0.0311889	0.00784444	0.0150444	0.0441985	0.00887619	0.00685	0.00227692	0.0366667	0.0565444	0.000125758	0.00353018	0.00628418	0.0153838	0.0313944	0.000547186	4.44444e-05	0.0267753	0	0	0.00792409	0.00698667
2002-09-25	0.131782	0.0922533	0.000514286	0.0193885	0.0176	0.036	0.0927328	0.031358	0.0776239	0.00858034	0.00409441	0.0147111	0.0692875	0.00487934	0	0.0112872	0.00158884	0.000355556	0.0537867	0.0278303	0.115911	0.0267753	0	0	0.0247455	0.0850733	0.093427	0	0.0317333	0.00784444	0.0150444	0.0638864	0.0104762	0.00685	0.00227692	0.0366667	0.0677444	0.000344372	0.00353018	0.00628418	0.0228128	0.0313944	0.000547186	4.44444e-05	0.0267753	0	0	0.00798123	0.00666667
2002-09-26	0.131782	0.0922533	0.000514286	0.0193885	0.0176	0.036	0.0927328	0.0923302	0.0776239	0.00858034	0.00409441	0.0147111	0.0788875	0.00487934	0	0.0112872	0.00158884	0.000355556	0.0537867	0.0278303	0.116044	0.0267753	0	0	0.0247455	0.0855533	0.093427	0	0.0317333	0.00784444	0.0150444	0.0638864	0.0104762	0.00685	0.00227692	0.0376444	0.0677444	0.000344372	0.00353018	0.00635084	0.0228128	0.0313944	0.000547186	4.44444e-05	0.0267753	0	0	0.00798123	0.00666667
2002-09-27	0.132145	0.0919333	0.000514286	0.0193885	0.0205333	0.036	0.0927328	0.0923302	0.0776239	0.00858034	0.00409441	0.0147111	0.0788875	0.0052349	0	0.011441	0.00158884	0.000355556	0.0537867	0.0397636	0.116044	0.0267753	0.0013	0	0.0247455	0.0855533	0.093427	0	0.0302222	0.00784444	0.0150444	0.0638864	0.0104762	0.00685	0.00307692	0.0376444	0.0677444	0.000344372	0.00353018	0.00635084	0.0228128	0.0313944	0.000547186	4.44444e-05	0.0267753	0	0	0.00798123	0.00666667
2002-09-28	0.132145	0.0919333	0.000680952	0.0193885	0.0376	0.102	0.0927328	0.0923302	0.0776239	0.00858034	0.00409441	0.0147111	0.0788875	0.00590157	0	0.0115179	0.00261106	0.000355556	0.0537867	0.0397636	0.116044	0.0267753	0.0013	0	0.0247455	0.0999533	0.0934876	0	0.0302222	0.00784444	0.0150444	0.0638864	0.0104762	0.00685	0.00307692	0.0376444	0.0677444	0.000344372	0.00393439	0.00635084	0.0228128	0.0313944	0.000547186	4.44444e-05	0.0267753	0	0	0.00798123	0.00666667
2002-09-29	0.132145	0.0919333	0.000680952	0.0201927	0.0446667	0.115867	0.0927328	0.0946413	0.0776239	0.00860598	0.00409441	0.0139111	0.0788875	0.00590157	0	0.0115179	0.00261106	0.000355556	0.0537867	0.0399775	0.116044	0.0267753	0.0013	0	0.0208455	0.126593	0.0934876	0	0.0599889	0.00784444	0.0150444	0.0638864	0.0104762	0.00685	0.00307692	0.0376444	0.0902778	0.000344372	0.00393439	0.00635084	0.0228128	0.0313944	0.000547186	4.44444e-05	0.0267753	0	0	0.00798123	0.00666667
2002-09-30	0.142145	0.0919333	0.00124643	0.0274727	0.0453179	0.1196	0.096285	0.0971413	0.083262	0.00860598	0.00409441	0.0139111	0.0788875	0.00590157	0	0.0175846	0.00261106	0.000311111	0.05432	0.0399775	0.116044	0.0267753	0.0013	0	0.0208455	0.126593	0.0952282	0	0.0634556	0.00784444	0.0161111	0.0638864	0.0104762	0.00685	0.00307692	0.0376444	0.0902778	0.000344372	0.00393439	0.00635084	0.0228128	0.0313944	0.000547186	4.44444e-05	0.0267753	0	0	0.00798123	0.00666667
2002-10-01	0.142145	0.0919333	0.00124643	0.0274727	0.0453179	0.1196	0.102468	0.0971413	0.083262	0.00860598	0.00409441	0.0139111	0.0788875	0.00590157	0	0.0256513	0.00261106	0.000311111	0.05432	0.0399775	0.116044	0.0267753	0.0013	0	0.0209027	0.126593	0.0952282	0	0.0634556	0.00784444	0.0161778	0.0638864	0.0104762	0.00685	0.0590769	0.0376444	0.0902778	0.000344372	0.0100944	0.00635084	0.0228128	0.0313944	0.000547186	4.44444e-05	0.0267753	0	0	0.00798123	0.00666667
2002-10-02	0.142145	0.0919333	0.00260952	0.0274727	0.0453179	0.128267	0.102468	0.0978413	0.083262	0.00860598	0.00409441	0.0139111	0.0790875	0.0329682	0	0.0256513	0.00461106	0.000311111	0.05448	0.0399775	0.118844	0.0267953	0.0013	0	0.0209027	0.126593	0.0952442	0	0.0634556	0.00731111	0.0161778	0.0638864	0.0104762	0.00685	0.0592769	0.0376444	0.0902778	0.000344372	0.0100944	0.00635084	0.0227462	0.0313944	0.000547186	4.44444e-05	0.0267753	0	0	0.00798123	0.00666667
2002-10-03	0.142145	0.0921733	0.00302619	0.0545716	0.0453179	0.128267	0.102468	0.0978413	0.083262	0.00860598	0.00409441	0.0139111	0.114087	0.0393238	0	0.0286513	0.00801106	0.000311111	0.05448	0.0399775	0.129956	0.0267953	0.0013	0	0.0209027	0.126593	0.0952442	0	0.0634556	0.00731111	0.0161778	0.0630364	0.0104762	0.00685	0.0598154	0.0376444	0.09	0.000344372	0.0105744	0.00635084	0.0227462	0.0313944	0.000547186	4.44444e-05	0.0267753	0	0	0.00798123	0.00666667
2002-10-04	0.147518	0.0921733	0.00302619	0.061025	0.0453179	0.129467	0.104418	0.0978413	0.083262	0.00865726	0.00409441	0.0139111	0.114087	0.0426571	0	0.104251	0.00801106	0.000311111	0.05448	0.0399775	0.15509	0.0267953	0.0013	0	0.0207812	0.126593	0.0952442	0	0.0634556	0.00731111	0.0161778	0.0630364	0.0104762	0.00735	0.0682154	0.0376444	0.09	0.000344372	0.0144733	0.00635084	0.0258128	0.0313944	0.000547186	4.44444e-05	0.0267753	0	0	0.00798123	0.00666667
2002-10-05	0.147518	0.0921733	0.00302619	0.0860916	0.0487846	0.129467	0.104868	0.0978413	0.0833832	0.00865726	0.00409441	0.0139111	0.124313	0.0448793	0	0.104251	0.0127444	0.000311111	0.05472	0.0399775	0.15509	0.0264733	0.0013	0	0.0207812	0.126593	0.110871	0	0.0633556	0.00731111	0.0161778	0.0630364	0.0104762	0.03015	0.0682154	0.0376444	0.09	0.000344372	0.0144733	0.00635084	0.0258128	0.0313944	0.000547186	0	0.0267753	0	0	0.00798123	0.00666667
2002-10-06	0.147518	0.0928933	0.0049131	0.0868916	0.0497385	0.130667	0.104868	0.0990117	0.0833832	0.00865726	0.00409441	0.0139111	0.124313	0.0450555	0	0.104451	0.0127444	0.000311111	0.05472	0.0399775	0.15509	0.0264733	0.0013	0	0.0207812	0.132113	0.111227	0	0.0636444	0.00731111	0.0161778	0.0630364	0.0104762	0.03015	0.0682154	0.0376444	0.0814667	0.000344372	0.0144733	0.00635084	0.0258128	0.0313944	0.000547186	0	0.0264533	0	0	0.00798123	0.00666667
2002-10-07	0.162518	0.0933733	0.0049131	0.0878657	0.0497385	0.130667	0.104868	0.0990117	0.0833832	0.00870855	0.00409441	0.0139111	0.129575	0.0463	0	0.120195	0.0127444	0.000311111	0.05472	0.0399775	0.15509	0.0264733	0.0013	0	0.0206847	0.132113	0.111787	0	0.0636444	0.00731111	0.0161778	0.0630364	0.0104762	0.03015	0.0772154	0.0376444	0.0814667	0.000344372	0.0154474	0.00635084	0.0258128	0.0313944	0.000547186	0	0.0264533	0	0	0.0078598	0.00666667
2002-10-08	0.162518	0.0933733	0.0049131	0.0923057	0.0500615	0.130667	0.104868	0.0990117	0.0833832	0.00870855	0.00409441	0.0139111	0.130238	0.0577222	0	0.120595	0.0127444	0.000311111	0.05472	0.0399775	0.15509	0.0264733	0.0013	0	0.0206847	0.132113	0.114787	0	0.0636444	0.00731111	0.0161778	0.0630364	0.0104762	0.03015	0.0808923	0.0376444	0.0617333	0.000344372	0.0154474	0.00635084	0.0258128	0.0313944	0.000547186	0	0.0264533	0	0	0.0078598	0.00666667
2002-10-09	0.167318	0.0933733	0.0049131	0.0951476	0.0500615	0.132667	0.107968	0.0990117	0.0833832	0.00870855	0.00409441	0.0125333	0.130238	0.0803889	0	0.172995	0.0176777	0.000311111	0.05472	0.0399775	0.15509	0.0264733	0.0013	0	0.0206847	0.132113	0.114787	0	0.0636444	0.00731111	0.0161778	0.0630364	0.0104762	0.02895	0.0810923	0.0376444	0.0617333	0.000344372	0.0154474	0.00635084	0.0258128	0.0313944	0.000547186	0	0.0264533	0	0	0.0078598	0.00666667
2002-10-10	0.167318	0.0933733	0.0049881	0.0963209	0.0500615	0.132667	0.107968	0.0990117	0.0833832	0.00884188	0.00409441	0.0125333	0.130238	0.0843873	0	0.173372	0.0176777	0.000311111	0.05472	0.0405348	0.155223	0.0264733	0.0013	0	0.0206847	0.132153	0.114921	0	0.0636778	0.00731111	0.0161778	0.0630364	0.0104762	0.02895	0.0810923	0.0376444	0.0617333	0.000344372	0.0155807	0.00635084	0.0259462	0.0313944	0.000547186	0	0.0287187	0	0	0.0078598	0.00666667
2002-10-11	0.169045	0.0933733	0.0049881	0.0963209	0.0500615	0.132933	0.107968	0.0990117	0.0833832	0.00884188	0.00413789	0.0125333	0.130238	0.0915428	0	0.174772	0.0176777	0.000311111	0.05472	0.0405348	0.16065	0.0264733	0.0013	0	0.0206847	0.132153	0.114921	0	0.0636778	0.00666667	0.0161778	0.0630364	0.0104762	0.02895	0.0810923	0.0376444	0.0617333	0.000344372	0.0155807	0.00635084	0.0257436	0.0313944	0.000547186	0	0.0287187	0	0	0.0078598	0.00666667
2002-10-12	0.169045	0.0933733	0.0049881	0.0963209	0.0509538	0.132933	0.110368	0.0990117	0.0833832	0.00884188	0.00413789	0.0133333	0.130238	0.0893048	0	0.176972	0.0174286	0.000311111	0.05472	0.0439651	0.16065	0.0264733	0.0013	0	0.0206847	0.129178	0.114921	0	0.0636778	0.00666667	0.0161778	0.0630364	0.0104762	0.02895	0.0834923	0.0374963	0.0617333	0.000125758	0.0155807	0.00635084	0.0257436	0.0313944	0.000547186	0	0.0287187	0	0	0.0078598	0.00666667
2002-10-13	0.169045	0.0933733	0.0049881	0.0965251	0.0509538	0.134933	0.113218	0.101362	0.0834721	0.00884188	0.00413789	0.0133333	0.130238	0.0893048	0	0.176972	0.0174286	0.000311111	0.0547467	0.0439651	0.16065	0.0287387	0.0013	0	0.0206847	0.129178	0.114921	0	0.0636778	0.00666667	0.0327111	0.0630364	0.0104762	0.02895	0.0834923	0.0374963	0.0617333	0.000125758	0.0157849	0.00635084	0.0257436	0.0313944	0.000547186	0	0.0287187	0	0	0.0078598	0.00666667
2002-10-14	0.169045	0.0933733	0.00502143	0.094643	0.0509538	0.134933	0.113218	0.101362	0.0834721	0.00884188	0.00413789	0.0133333	0.130238	0.226638	0	0.185682	0.100007	0.000281481	0.0547467	0.0454197	0.16065	0.0287387	0.0013	0	0.0206847	0.129178	0.114921	0	0.0636778	0.00666667	0.0327111	0.0630364	0.0104762	0.02895	0.0837231	0.0374963	0.0617333	0.000125758	0.0157849	0.00635084	0.0257436	0.0313944	0.000547186	0	0.0287187	0	0	0.00776331	0.00666667
2002-10-15	0.171245	0.0933733	0.00502143	0.094643	0.0510205	0.136533	0.113324	0.101362	0.0834721	0.00884188	0.00418789	0.0136889	0.1313	0.305705	0	0.185682	0.121696	0.000281481	0.0547467	0.0454197	0.16065	0.0287387	0.0013	0	0.0206847	0.129178	0.114921	0	0.0636778	0.00666667	0.0327111	0.0630364	0.0104762	0.02895	0.0853231	0.0374963	0.0617333	0.000125758	0.0157849	0.00635084	0.0257436	0.0314444	0.000547186	0	0.0287187	0	0	0.00776331	0.00666667
2002-10-16	0.171245	0.0933733	0.00502143	0.095003	0.0514923	0.136533	0.132491	0.102062	0.0771879	0.00886752	0.00418789	0.0136889	0.132625	0.30606	0	0.186749	0.122088	0.000281481	0.0547467	0.117395	0.16065	0.0287387	0.0013	0	0.0206847	0.129178	0.114921	0	0.0636778	0.00666667	0.0327111	0.0630364	0.0104762	0.02895	0.0853231	0.0374963	0.0617333	0.000125758	0.0157849	0.00635084	0.0257436	0.0314444	0.000547186	0	0.0287187	0	0	0.00776331	0.00666667
2002-10-17	0.171245	0.0935333	0.00502143	0.095003	0.0515436	0.136533	0.132599	0.102062	0.0771879	0.00886752	0.00445455	0.0136889	0.132625	0.307047	0	0.186749	0.122088	0.000281481	0.0546133	0.117395	0.16065	0.0287387	0.0013	0	0.0207812	0.129178	0.114921	0	0.0636778	0.00666667	0.0327111	0.0630364	0.0104762	0.02895	0.0853231	0.0374963	0.0617333	0.000125758	0.0161449	0.00635084	0.0270872	0.0314444	0.000547186	0	0.0287187	0	0	0.0078598	0.00666667
2002-10-18	0.171427	0.0938133	0.00535	0.0954297	0.0515436	0.136533	0.132599	0.103662	0.0771879	0.00886752	0.00462598	0.0137333	0.13275	0.307279	0	0.186826	0.122241	0.000281481	0.0546133	0.117395	0.16065	0.0287387	0.0013	0	0.0210812	0.129178	0.114921	0	0.0636778	0.00666667	0.0327111	0.0630364	0.0104762	0.02895	0.0853231	0.0374963	0.0617333	0.000125758	0.0165716	0.00643973	0.0270872	0.0318825	0.000547186	0	0.0287187	0	0	0.0078598	0.00666667
2002-10-19	0.172827	0.0938133	0.00535	0.0954297	0.0515436	0.137333	0.132599	0.103662	0.0771879	0.00886752	0.00512598	0.0137333	0.13275	0.307697	0	0.186826	0.122241	0.000281481	0.0550133	0.117395	0.178006	0.0287387	0.00225273	0	0.0210812	0.129178	0.114921	0	0.0636778	0.00666667	0.0327111	0.0630364	0.0104762	0.02895	0.0853231	0.0374963	0.0617333	0.000125758	0.0165716	0.00643973	0.0270872	0.0318825	0.000547186	0	0.0287187	0	0	0.0078598	0.00666667
2002-10-20	0.172827	0.0938133	0.00535	0.0954297	0.0533176	0.137467	0.133647	0.103662	0.0771879	0.00886752	0.00512598	0.0229333	0.133575	0.307771	0	0.193303	0.122241	0.000281481	0.0550133	0.117395	0.178406	0.0287387	0.00225273	0	0.0210812	0.129178	0.114363	0	0.0636778	0.00666667	0.0327111	0.0630364	0.0104762	0.02895	0.0857769	0.0365185	0.0617333	0.000125758	0.0165716	0.00637306	0.0270872	0.0318825	0.000547186	0	0.0287187	0	0	0.0078598	0.00666667
2002-10-21	0.172827	0.0939733	0.00535	0.0954297	0.0533176	0.138667	0.133647	0.103662	0.0772545	0.00874188	0.00512598	0.0229333	0.133575	0.309285	0	0.193303	0.122241	0.000281481	0.0551467	0.118153	0.215086	0.029092	0.00225273	0	0.0210812	0.129178	0.114363	0	0.0636778	0.00666667	0.0327111	0.0630364	0.0104762	0.031	0.0877769	0.0365185	0.0617333	0	0.0165716	8.88889e-05	0.0270872	0.0277881	0.000547186	0	0.0287187	0	0	0.0081598	0.00666667
2002-10-22	0.172827	0.0939733	0.00535	0.0954297	0.0533176	0.138667	0.133647	0.103662	0.0772545	0.00874188	0.00512598	0.0229333	0.133575	0.309285	0	0.193303	0.122241	0.000281481	0.0551467	0.118153	0.215086	0.029092	0.00225273	0	0.0210812	0.129178	0.114363	0	0.0636778	0.00666667	0.0327111	0.0630364	0.0104762	0.031	0.0877769	0.0365185	0.0617333	0	0.0165716	8.88889e-05	0.0270872	0.0277881	0	0.0245545	0.0287187	0	0	0.0081598	0.00666667
2002-10-23	0.172827	0.0939733	0.00535	0.0954297	0.0533176	0.138667	0.133647	0.104062	0.0772545	0.00874188	0.00512598	0.0229333	0.133575	0.309581	0	0.193303	0.122241	0.000281481	0.0551467	0.118153	0.215086	0.029092	0.00225273	0	0.0210812	0.129178	0.114363	0	0.0636778	0.00666667	0.0405778	0.0579	0.0104762	0.031	0.0877769	0.0365185	0.0617333	0	0.0165716	0.000210101	0.0270872	0.0277881	0	0.0245545	0.0287187	0	0	0.0081598	0.00666667
2002-10-24	0.175327	0.0939733	0.00535	0.0954297	0.0533176	0.138667	0.133647	0.104062	0.0772545	0.00874188	0.00512598	0.0229333	0.133575	0.309581	0	0.193503	0.122241	0.000281481	0.0551467	0.118408	0.215086	0.029092	0.00225273	0	0.0210812	0.129178	0.114363	0	0.0636778	0.00666667	0.0405778	0.0579	0.0104762	0.031	0.0882577	0.0365185	0.0617333	0	0.0165716	0.000210101	0.0270872	0.0277881	0	0.0245545	0.0287187	0	0	0.0081598	0.00666667
2002-10-25	0.175327	0.0939733	0.00535	0.0954297	0.0533176	0.138667	0.133647	0.104062	0.0772545	0.00874188	0.00512598	0.0229333	0.133575	0.310047	0	0.193403	0.122241	0.000281481	0.0551467	0.118475	0.219752	0.029092	0.00225273	0	0.0210812	0.129178	0.114363	0	0.0636778	0.00666667	0.0405778	0.0579	0.0104762	0.031	0.0882577	0.0365185	0.0617333	0	0.0165716	0.000210101	0.0270872	0.0277881	0	0.0245545	0.0287187	0	0	0.0081598	0.00666667
2002-10-26	0.175327	0.0977333	0.00535	0.0959097	0.0533176	0.138667	0.133647	0.104412	0.0772545	0.00793419	0.00103157	0.0229333	0.133975	0.310047	0	0.193403	0.122241	0.000281481	0.0551467	0.118475	0.219752	0.029092	0.00225273	0	0.0210812	0.129178	0.114363	0	0.0636778	0.00666667	0.0405778	0.0579	0.0104762	0.031	0.0882577	0.0365185	0.0617333	0	0.0165716	0.000210101	0.0270872	0.0277881	0	0.0245545	0.0287187	0	0	0.0081598	0.00666667
2002-10-27	0.175327	0.0977333	0.00535	0.0959097	0.0533176	0.138667	0.133647	0.104412	0.0772545	0.0097906	0.00103157	0.0229333	0.133975	0.310679	0	0.193403	0.122241	0.000281481	0.0551467	0.120135	0.261502	0.029124	0.027847	0	0.0210812	0.129178	0.114741	0	0.0636778	0.00666667	0.0456222	0.0579	0.0104762	0.031	0.0883077	0.0365185	0.0617333	0	0.0165716	0.000276768	0.0270872	0.0277881	0	0.0245545	0.0287187	0	0	0.0081598	0.00666667
2002-10-28	0.175327	0.0977333	0.00538333	0.096123	0.0533176	0.138667	0.133647	0.104412	0.0772545	0.0097906	0.00103157	0.0229333	0.133975	0.310679	0	0.208269	0.122241	0.000281481	0.0551467	0.120135	0.261502	0.0294393	0.027847	0	0.0210812	0.129178	0.114741	0	0.0636778	0.00666667	0.0460222	0.0629464	0.0103429	0.03105	0.107308	0.0365185	0.0617333	0	0.0167849	0.000276768	0.0272897	0.0277881	0	0.0245545	0.029034	0	0	0.0081598	0.00666667
2002-10-29	0.175327	0.0977333	0.00538333	0.0980051	0.0534202	0.138667	0.134094	0.104412	0.0772545	0.00991624	0.00103157	0.0229333	0.133975	0.310679	0	0.208269	0.122241	0.000281481	0.0551467	0.120135	0.261502	0.0294393	0.0268943	0	0.0249812	0.129178	0.114741	0	0.0636778	0.0068	0.0460222	0.0629464	0.0103429	0.0316	0.107808	0.0365185	0.0617333	0	0.0167849	0.000276768	0.0272897	0.0277881	0	0.0245545	0.029034	0	0	0.0081598	0.00666667
2002-10-30	0.175327	0.0977333	0.0082246	0.0980051	0.0534202	0.138667	0.134094	0.104412	0.0772545	0.00991624	0.00103157	0.0229333	0.133975	0.310679	0	0.208269	0.122241	0.000281481	0.0551467	0.121517	0.259311	0.0294393	0.0268943	0	0.0249812	0.129178	0.115151	0	0.0636778	0.0068	0.0460222	0.0629464	0.0103683	0.0316	0.107808	0.0365185	0.0617333	0	0.0167849	0.000276768	0.0264821	0.0277881	0	0.0245545	0.029034	0	0	0.0081598	0.00666667
2002-10-31	0.175327	0.0977333	0.0082246	0.0980051	0.0534202	0.138667	0.134094	0.139491	0.0772545	0.0175385	0.00103157	0.0229333	0.133975	0.311576	0.000181818	0.208667	0.122396	0.000281481	0.0551467	0.122025	0.261534	0.0294393	0.0268943	0	0.0249812	0.129178	0.115151	0	0.0636778	0.0068	0.0460222	0.0629464	0.0112889	0.0316	0.110008	0.0365185	0.0617333	0	0.0167849	0.000276768	0.0417564	0.000488095	0.000181818	0	0.029034	0	0	0.0081598	0.00666667
2002-11-01	0.175327	0.0977333	0.0132722	0.0983251	0.0534202	0.138667	0.134094	0.143191	0.0772545	0.0175385	0.0321316	0.0229333	0.133975	0.311576	0.000181818	0.208667	0.122396	0.000281481	0.0583467	0.122025	0.261534	0.0294393	0.0268943	0	0.0249812	0.129178	0.115151	0	0.0636778	0.0068	0.0460222	0.0629464	0.0177333	0.034625	0.110862	0.0370104	0.0634111	0	0.0167849	0.000276768	0.0417564	0.0279852	0.000181818	0	0.029034	0	0	0.0081598	0.00666667
2002-11-02	0.175327	0.0982133	0.0132722	0.104725	0.142887	0.173333	0.134094	0.143191	0.0772545	0.0217615	0.0321316	0.0229333	0.133975	0.332688	0.000181818	0.208667	0.141473	0.000281481	0.134747	0.137807	0.261534	0.0294393	0.0358849	0	0.0249812	0.129178	0.115294	0	0.0636778	0.0068	0.0460222	0.0629464	0.0177333	0.051025	0.110862	0.0370104	0.0647111	0	0.0167849	0.000276768	0.0422103	0.0279852	0.000181818	0	0.029034	0.0013	0	0.0081598	0.00666667
2002-11-03	0.175327	0.0982133	0.0132722	0.104725	0.142887	0.173333	0.134894	0.156131	0.0772545	0.0220974	0.0321316	0.0229333	0.134038	0.332688	0.000369408	0.208667	0.141473	0.000281481	0.134747	0.137807	0.262334	0.0294393	0.0358849	0	0.0249812	0.129291	0.115294	0	0.0636778	0.0068	0.0460222	0.0629464	0.0177333	0.051025	0.110962	0.0370104	0.0647111	0	0.0167849	0.000276768	0.0422769	0.0317852	0.000181818	0	0.029034	0.0013	0	0.0081598	0.00666667
2002-11-04	0.175327	0.0982933	0.0132722	0.104725	0.145287	0.173333	0.134894	0.156131	0.0772545	0.0379077	0.0323287	0.0229333	0.135587	0.332688	0.000369408	0.208667	0.141473	0.000325926	0.134747	0.140862	0.262334	0.0294393	0.0360449	0	0.0249812	0.129291	0.115294	0	0.0636778	0.0068	0.0460222	0.0629464	0.0177333	0.051025	0.110962	0.0370104	0.0647111	0.0054	0.0167849	0.000276768	0.0422769	0.0317852	0.000369408	0	0.029066	0.00146	0	0.0078598	0.00666667
2002-11-05	0.175327	0.0982933	0.0132722	0.104725	0.145287	0.174933	0.134894	0.156131	0.0772545	0.0379077	0.0323287	0.0229333	0.135587	0.332688	0.000369408	0.208667	0.141473	0.000325926	0.134747	0.140862	0.262334	0.0294393	0.0360449	0	0.0249812	0.132267	0.115294	0	0.0637778	0.0068	0.0460222	0.0653964	0.0177333	0.0522	0.110962	0.0370104	0.0647444	0.0054	0.0167849	0.000276768	0.0422769	0.0317852	0.000369408	0	0.029066	0.00146	0	0.0078598	0.00666667
2002-11-06	0.175327	0.0982933	0.0144437	0.112405	0.145287	0.174933	0.135894	0.156131	0.0835387	0.0923966	0.0323287	0.0229333	0.137887	0.332688	0.000369408	0.209033	0.141473	0.000325926	0.134747	0.140862	0.262334	0.0294713	0.0389377	0	0.0249812	0.132267	0.115294	0	0.0637778	0.0068	0.0460222	0.0653964	0.0177333	0.05235	0.111438	0.0370104	0.0647444	0.00847222	0.0167849	0.000276768	0.0422769	0.0317852	0.000369408	4.44444e-05	0.029066	0.00146	0	0.0078598	0.00666667
2002-11-07	0.175809	0.0986133	0.020127	0.117098	0.145405	0.174933	0.136249	0.156131	0.0835387	0.0932043	0.0364231	0.0229333	0.137887	0.351394	0.000369408	0.209033	0.166283	0.000325926	0.134747	0.164189	0.262334	0.037168	0.0389377	0	0.0249812	0.132267	0.115294	0.00016	0.0637778	0.0068	0.0460222	0.0653964	0.0177333	0.05235	0.111438	0.0370104	0.0732778	0.0289576	0.0175582	0.00656094	0.0422769	0.0358796	0.000916595	4.44444e-05	0.0367947	0.00146	0	0.0081598	0.00698667
2002-11-08	0.175809	0.0986133	0.020127	0.117178	0.145405	0.175067	0.136274	0.156131	0.0835387	0.0932043	0.0364231	0.0229333	0.137887	0.351505	0.000369408	0.212367	0.166283	0.000325926	0.134747	0.164189	0.262334	0.037168	0.0409431	0	0.0249812	0.132267	0.115294	0.00016	0.0637778	0.00797778	0.0460222	0.0662464	0.0354476	0.05235	0.111438	0.0370104	0.0735556	0.0289576	0.0176382	0.00656094	0.0474325	0.0358796	0.000916595	4.44444e-05	0.0367947	0.00146	0	0.0081598	0.00698667
2002-11-09	0.175809	0.0986133	0.020127	0.117178	0.145405	0.175067	0.136274	0.156131	0.0835387	0.0935376	0.0364231	0.0229333	0.137887	0.351505	0.000369408	0.212367	0.166283	0.000325926	0.134747	0.164189	0.262334	0.037168	0.0423831	0	0.0249812	0.132267	0.115294	0.00016	0.0637778	0.0111778	0.0460222	0.0713828	0.0354476	0.05235	0.111438	0.0379881	0.0735556	0.0377242	0.0176382	0.00656094	0.0967658	0.0663796	0.000916595	4.44444e-05	0.0367947	0.0295906	0	0.0081598	0.0101867
2002-11-10	0.175809	0.0986133	0.020127	0.117178	0.146338	0.175067	0.136274	0.160354	0.0835387	0.0955376	0.0581231	0.0243111	0.154888	0.351505	0.00303608	0.212367	0.166283	0.000355556	0.134747	0.164189	0.262334	0.037168	0.0423831	0	0.0249812	0.132636	0.115294	0.00016	0.0637778	0.0111778	0.0460222	0.0713828	0.0354476	0.05235	0.111438	0.0379881	0.0735556	0.0377242	0.0176382	0.00656094	0.0967658	0.0900796	0.000916595	0.0198074	0.0367947	0.0360449	0	0.0081598	0.0101867
2002-11-11	0.175809	0.0986133	0.020127	0.117658	0.164656	0.175067	0.137374	0.160354	0.0835387	0.0955376	0.0679231	0.0243111	0.154888	0.351505	0.00303608	0.212367	0.166283	0.000355556	0.19928	0.164189	0.262334	0.0575947	0.0433358	0	0.0251027	0.132636	0.115294	0.00016	0.0652889	0.0111778	0.0460222	0.0713828	0.0371492	0.05235	0.111438	0.0379881	0.0742222	0.037918	0.0176382	0.00656094	0.0967658	0.0910796	0.00358326	0.0198074	0.0367947	0.0433358	0	0.00958838	0.0101867
2002-11-12	0.175809	0.0986133	0.020127	0.117658	0.164656	0.188267	0.137374	0.168876	0.0835387	0.143604	0.0916231	0.0243111	0.154888	0.351505	0.0202361	0.212367	0.166283	0.000355556	0.19928	0.164189	0.262334	0.0575947	0.05925	0.155556	0.0251027	0.132636	0.115294	0.00016	0.0652889	0.0111778	0.0460222	0.0713828	0.0371492	0.05235	0.111438	0.0379881	0.0756778	0.037918	0.0176382	0.00656094	0.177988	0.0910796	0.00558326	0.0198074	0.0367947	0.05925	0	0.00958838	0.0382933
2002-11-13	0.175809	0.0986133	0.0203687	0.117658	0.164656	0.188267	0.137374	0.201628	0.0835387	0.143604	0.0916231	0.0243111	0.154888	0.351505	0.0518361	0.212367	0.166283	0.000355556	0.19928	0.166795	0.262334	0.0575947	0.0610591	0.155556	0.0251027	0.132636	0.115294	0.00016	0.0652889	0.0111778	0.0460222	0.0713828	0.0371492	0.05235	0.111438	0.0379881	0.0846111	0.0404513	0.0176382	0.00656094	0.181344	0.0910796	0.00558326	0.0198074	0.0367947	0.05925	0	0.00946695	0.0382933
2002-11-14	0.175809	0.0986133	0.0203687	0.117658	0.164656	0.212267	0.137374	0.202728	0.0835387	0.145026	0.0916231	0.0327111	0.154888	0.351505	0.0538361	0.212367	0.166283	0.000355556	0.19928	0.166795	0.262334	0.0575947	0.0610591	0.250667	0.0251027	0.132636	0.115294	0.0285867	0.0652889	0.0111778	0.0460222	0.0713828	0.0372857	0.05535	0.111438	0.0493881	0.0846111	0.0405771	0.0176382	0.00656094	0.182766	0.0910796	0.100917	0.0198074	0.0367947	0.05925	0	0.00958838	0.0382933
2002-11-15	0.175809	0.103333	0.0203687	0.117658	0.164656	0.212267	0.137374	0.202728	0.0835387	0.14548	0.0916231	0.0327111	0.155287	0.351505	0.100369	0.212367	0.166283	0.000355556	0.19928	0.166795	0.262334	0.0575947	0.0708191	0.29	0.0251027	0.132636	0.115294	0.0285867	0.0652889	0.0111778	0.0460222	0.0763828	0.0372857	0.05695	0.111438	0.0495363	0.0846111	0.0597957	0.0176382	0.00656094	0.182766	0.0910796	0.100917	0.0198074	0.0367947	0.05925	0	0.00958838	0.0382933
2002-11-16	0.179009	0.103653	0.022502	0.117658	0.164656	0.212267	0.159174	0.231055	0.0835387	0.14548	0.0916231	0.0327111	0.155287	0.353743	0.100369	0.212367	0.166532	0.000355556	0.19928	0.166795	0.262334	0.0579167	0.0708191	0.29	0.0251027	0.132636	0.115777	0.0285867	0.0652889	0.0111778	0.0460222	0.0763828	0.0372857	0.05695	0.111438	0.0495363	0.0846111	0.060979	0.0176382	0.00656094	0.182766	0.0910796	0.100917	0.0198074	0.0575433	0.05925	0	0.00958838	0.0382933
2002-11-17	0.179009	0.103653	0.022502	0.121178	0.164656	0.212267	0.159174	0.231055	0.0835387	0.178636	0.0916231	0.0327111	0.155287	0.353743	0.100369	0.212367	0.166532	0.000355556	0.19928	0.166795	0.262334	0.0579167	0.0708191	0.344444	0.0251027	0.132636	0.115777	0.05492	0.0653556	0.0111778	0.0460222	0.0763828	0.0372857	0.05695	0.111438	0.0872252	0.0846111	0.060979	0.0176382	0.00656094	0.182766	0.0910796	0.100917	0.0198074	0.0575433	0.05925	0.29	0.00958838	0.0382933
2002-11-18	0.179009	0.103653	0.022502	0.121178	0.164656	0.212267	0.159174	0.241866	0.0835387	0.182058	0.0916231	0.0327111	0.155312	0.353743	0.124503	0.212367	0.166532	0.0263149	0.19928	0.166795	0.264524	0.0579167	0.0708191	0.344444	0.0251027	0.132676	0.115777	0.05492	0.0653556	0.0111778	0.0460222	0.0763828	0.0450952	0.05695	0.111438	0.0872252	0.0846111	0.060979	0.0176382	0.00656094	0.182766	0.0910796	0.12505	0.0460482	0.0575433	0.06901	0.29	0.00958838	0.0382933
2002-11-19	0.179009	0.103653	0.0226639	0.124725	0.164656	0.212267	0.159174	0.25574	0.0835387	0.182058	0.0916231	0.0327111	0.155312	0.353743	0.124503	0.212367	0.166532	0.0263149	0.19928	0.166795	0.264524	0.0579167	0.0708191	0.344444	0.0251027	0.132676	0.115777	0.05492	0.0653556	0.0111778	0.0460222	0.0763828	0.0450952	0.05695	0.111438	0.0872252	0.0846111	0.060979	0.0176382	0.00656094	0.182766	0.0910796	0.12505	0.0460482	0.0575433	0.06901	0.344444	0.00958838	0.0382933
2002-11-20	0.179009	0.103653	0.0226639	0.124725	0.164656	0.212267	0.159174	0.25574	0.0835387	0.182279	0.0916231	0.0327111	0.155312	0.353743	0.124503	0.212367	0.166532	0.0263149	0.19928	0.166795	0.264524	0.0579167	0.0708191	0.344444	0.0251027	0.132676	0.115777	0.05492	0.0653556	0.0111778	0.0460222	0.0763828	0.0450952	0.05695	0.111438	0.0872252	0.0846111	0.060979	0.0176382	0.00656094	0.182766	0.0910796	0.12505	0.0460482	0.0575433	0.06901	0.344444	0.00958838	0.0382933
2002-11-21	0.179009	0.103813	0.0226639	0.124725	0.164656	0.212267	0.159174	0.25574	0.0835387	0.182279	0.0916231	0.0327111	0.155312	0.353743	0.124503	0.212367	0.166532	0.0263149	0.19928	0.166795	0.264524	0.0579167	0.0708191	0.344444	0.0251027	0.132676	0.11683	0.05492	0.0653556	0.0111778	0.0460222	0.0763828	0.0450952	0.05695	0.111438	0.0872252	0.0846111	0.060979	0.0176382	0.00656094	0.184766	0.0910796	0.12505	0.0706027	0.0575433	0.06901	0.344444	0.00958838	0.0382933
2002-11-22	0.180609	0.103813	0.0226639	0.124725	0.164656	0.212267	0.159174	0.25574	0.0835387	0.182279	0.0916231	0.0327111	0.155312	0.353743	0.124503	0.212367	0.166532	0.0508694	0.19928	0.166795	0.264524	0.0579167	0.0708191	0.344444	0.0251027	0.132676	0.11683	0.05492	0.0653556	0.0111778	0.0460222	0.0763828	0.0450952	0.05695	0.117838	0.0872252	0.0846111	0.060979	0.0176382	0.00656094	0.184766	0.0910796	0.12505	0.0706027	0.0575433	0.06901	0.344444	0.0286884	0.0382933
2002-11-23	0.180609	0.103813	0.0226639	0.125605	0.164656	0.212267	0.159174	0.25574	0.0835387	0.185345	0.0916231	0.0327111	0.155312	0.353743	0.124503	0.212367	0.166532	0.0508694	0.19928	0.166795	0.264524	0.0579167	0.0708191	0.344444	0.0251027	0.132676	0.11683	0.05492	0.0653556	0.0111778	0.0460222	0.0763828	0.0450952	0.05695	0.117838	0.0872252	0.0846111	0.060979	0.0176382	0.00656094	0.184766	0.0910796	0.12505	0.0706027	0.0575433	0.06901	0.344444	0.0286884	0.0382933
2002-11-24	0.180609	0.103813	0.0226639	0.125605	0.164656	0.212267	0.159174	0.25574	0.0835387	0.185345	0.0916231	0.0327111	0.155312	0.353743	0.124503	0.212367	0.166532	0.0508694	0.19928	0.166795	0.264524	0.0579167	0.0708191	0.344444	0.0251027	0.132676	0.11683	0.05492	0.0653556	0.0111778	0.0460222	0.0763828	0.0450952	0.05695	0.117838	0.0872252	0.0846111	0.060979	0.0176382	0.00656094	0.185099	0.0910796	0.12505	0.0706027	0.0575433	0.0708191	0.344444	0.0286884	0.0382933
2002-11-25	0.180609	0.103813	0.0226639	0.125605	0.164656	0.212267	0.159174	0.25574	0.0835387	0.185345	0.0916231	0.0327111	0.155312	0.353743	0.124503	0.212367	0.166532	0.0508694	0.19928	0.166795	0.264524	0.0579167	0.0708191	0.344444	0.0251027	0.132676	0.11683	0.05492	0.0653556	0.0111778	0.0460222	0.0763828	0.0450952	0.05695	0.117838	0.0872252	0.0846111	0.060979	0.0176382	0.00656094	0.185099	0.0910796	0.12505	0.0706027	0.0575433	0.0708191	0.344444	0.0286884	0.0382933
2002-11-26	0.181109	0.103893	0.0226639	0.125605	0.164656	0.212267	0.159174	0.25574	0.0835387	0.185345	0.0916231	0.0327111	0.155312	0.353743	0.124503	0.213933	0.166532	0.0696376	0.19928	0.166795	0.264524	0.0579167	0.0708191	0.344444	0.0251027	0.132676	0.11683	0.05492	0.0653556	0.0111778	0.0460222	0.0763828	0.0450952	0.05695	0.117838	0.0872252	0.0846111	0.060979	0.0176382	0.00656094	0.185099	0.0910796	0.12505	0.0706027	0.0575433	0.0708191	0.344444	0.0286884	0.0382933
2002-11-27	0.181109	0.103893	0.0226639	0.125605	0.164656	0.212267	0.159174	0.25574	0.0835387	0.185345	0.0916231	0.0327111	0.155312	0.353743	0.124503	0.213933	0.166532	0.0696376	0.19928	0.166795	0.274258	0.0579167	0.0708191	0.344444	0.0251027	0.132676	0.11683	0.05492	0.0653556	0.0111778	0.0460222	0.0763828	0.0450952	0.05695	0.117838	0.0872252	0.104344	0.060979	0.0176382	0.00656094	0.185099	0.0910796	0.12505	0.0706027	0.0575433	0.0708191	0.344444	0.0286884	0.0382933
2002-11-28	0.181109	0.103893	0.0226639	0.125605	0.164656	0.212267	0.159174	0.25574	0.0835387	0.185345	0.0916231	0.0327111	0.155312	0.353743	0.124503	0.213933	0.166532	0.0696376	0.19928	0.166795	0.274258	0.0579167	0.0708191	0.344444	0.0251027	0.132676	0.11683	0.05492	0.0653556	0.0111778	0.0460222	0.0763828	0.0450952	0.05695	0.117838	0.0872252	0.104344	0.060979	0.0176382	0.00656094	0.185099	0.0910796	0.12505	0.0706027	0.0575433	0.0708191	0.344444	0.0286884	0.0382933
2002-11-29	0.181109	0.103893	0.0226639	0.125605	0.164656	0.212267	0.159174	0.25574	0.0835387	0.186012	0.0916231	0.0327111	0.155312	0.353743	0.124503	0.213933	0.166532	0.0696376	0.19928	0.166795	0.274258	0.0579167	0.0708191	0.344444	0.0251027	0.132676	0.11683	0.05492	0.0653556	0.0111778	0.0460222	0.0763828	0.0450952	0.05695	0.117838	0.0872252	0.104344	0.060979	0.0176382	0.00656094	0.185099	0.0910796	0.12505	0.089371	0.0575433	0.0708191	0.344444	0.0286884	0.0382933
2002-11-30	0.181109	0.103893	0.0226639	0.125605	0.164656	0.212267	0.159174	0.25574	0.0835387	0.186012	0.0916231	0.0327111	0.155312	0.353743	0.124503	0.213933	0.166532	0.0696376	0.19928	0.166795	0.274258	0.0579167	0.0708191	0.344444	0.0251027	0.132676	0.11683	0.05492	0.0653556	0.0111778	0.0460222	0.0763828	0.0450952	0.05695	0.117838	0.0872252	0.104344	0.060979	0.0176382	0.00656094	0.185099	0.0910796	0.12505	0.089371	0.0575433	0.0708191	0.344444	0.0286884	0.0382933
2002-12-01	0.181109	0.103893	0.0226639	0.125605	0.164656	0.212267	0.159174	0.25574	0.0835387	0.186012	0.0916231	0.0327111	0.155312	0.353743	0.124503	0.213933	0.166532	0.0696376	0.19928	0.166795	0.274258	0.0579167	0.0708191	0.344444	0.0251027	0.132676	0.11683	0.05492	0.0653556	0.0111778	0.0460222	0.0763828	0.0450952	0.05695	0.117838	0.0872252	0.104344	0.060979	0.0176382	0.00656094	0.185099	0.0910796	0.12505	0.089371	0.0575433	0.0708191	0.344444	0.0286884	0.0382933
2002-12-02	0.181109	0.103893	0.0226639	0.125605	0.164656	0.212267	0.159174	0.25574	0.0835387	0.186012	0.0916231	0.0327111	0.155312	0.353743	0.124503	0.213933	0.166532	0.0919763	0.19928	0.166795	0.274258	0.0579167	0.0708191	0.344444	0.0251027	0.132676	0.11683	0.05492	0.0653556	0.0111778	0.0460222	0.0763828	0.0450952	0.05695	0.117838	0.0872252	0.104344	0.060979	0.0176382	0.00656094	0.185099	0.0910796	0.12505	0.0919763	0.0575433	0.0708191	0.344444	0.0286884	0.0382933
2002-12-03	0.181109	0.103893	0.0226639	0.125605	0.164656	0.212267	0.159174	0.25574	0.0835387	0.186012	0.0916231	0.0327111	0.155312	0.353743	0.124503	0.213933	0.166532	0.0919763	0.19928	0.166795	0.274258	0.0579167	0.0708191	0.344444	0.0251027	0.132676	0.11683	0.05492	0.0653556	0.0111778	0.0460222	0.0763828	0.0450952	0.05815	0.117838	0.0872252	0.104344	0.060979	0.0176382	0.00656094	0.185099	0.0910796	0.12505	0.0919763	0.0575433	0.0708191	0.344444	0.0286884	0.0382933
2002-12-04	0.181109	0.103893	0.0226639	0.125605	0.164656	0.212267	0.159174	0.25574	0.0835387	0.186012	0.0916231	0.0327111	0.155312	0.353743	0.124503	0.213933	0.166532	0.0919763	0.19928	0.166795	0.274258	0.0579167	0.0708191	0.344444	0.0251027	0.132676	0.11683	0.05492	0.0653556	0.0111778	0.0460222	0.0763828	0.0450952	0.05815	0.174238	0.0872252	0.104344	0.060979	0.0176382	0.00656094	0.185099	0.0910796	0.12505	0.0919763	0.0575433	0.0708191	0.344444	0.0286884	0.0382933
2002-12-05	0.181109	0.103893	0.0226639	0.125605	0.164656	0.212267	0.159174	0.25574	0.0835387	0.186012	0.0916231	0.0327111	0.155312	0.353743	0.124503	0.213933	0.166532	0.0919763	0.19928	0.166795	0.274258	0.0579167	0.0708191	0.344444	0.0251027	0.132676	0.11683	0.05492	0.0653556	0.0111778	0.0460222	0.0763828	0.0450952	0.05815	0.174238	0.0872252	0.104344	0.060979	0.0176382	0.00656094	0.185099	0.0910796	0.12505	0.0919763	0.0575433	0.0708191	0.344444	0.0286884	0.0382933
2002-12-06	0.181109	0.103893	0.0226639	0.125605	0.164656	0.212267	0.159174	0.25574	0.0835387	0.186012	0.0916231	0.0327111	0.155312	0.353743	0.124503	0.213933	0.166532	0.0919763	0.19928	0.166795	0.274258	0.0579167	0.0708191	0.344444	0.0251027	0.132676	0.11683	0.05492	0.0653556	0.0111778	0.0460222	0.0763828	0.0450952	0.05815	0.174238	0.0872252	0.104344	0.060979	0.0176382	0.00656094	0.185099	0.0910796	0.12505	0.0919763	0.0575433	0.0708191	0.344444	0.0286884	0.0382933
2002-12-07	0.181109	0.103893	0.0226639	0.125605	0.164656	0.212267	0.159174	0.25574	0.0835387	0.186012	0.0916231	0.0327111	0.155312	0.353743	0.124503	0.213933	0.166532	0.0919763	0.19928	0.166795	0.274258	0.0579167	0.0708191	0.344444	0.0251027	0.132676	0.11683	0.05492	0.0653556	0.0111778	0.0460222	0.0763828	0.0450952	0.05815	0.174238	0.0872252	0.104344	0.060979	0.0176382	0.00656094	0.185099	0.0910796	0.12505	0.0919763	0.0575433	0.0708191	0.344444	0.0286884	0.0382933
2002-12-08	0.181109	0.103893	0.0226639	0.125605	0.164656	0.212267	0.159174	0.25574	0.0835387	0.186012	0.0916231	0.0327111	0.155312	0.353743	0.124503	0.213933	0.166532	0.0919763	0.19928	0.166795	0.274258	0.0579167	0.0708191	0.344444	0.0251027	0.132676	0.11683	0.05492	0.0653556	0.0111778	0.0460222	0.0763828	0.0450952	0.05815	0.174238	0.0872252	0.104344	0.060979	0.0176382	0.00656094	0.185099	0.0910796	0.12505	0.0919763	0.0575433	0.0708191	0.344444	0.0286884	0.0382933
2002-12-09	0.181109	0.103893	0.0226639	0.125605	0.164656	0.212267	0.159174	0.25574	0.0835387	0.186012	0.0916231	0.0327111	0.155312	0.353743	0.124503	0.213933	0.166532	0.0919763	0.19928	0.166795	0.274258	0.0579167	0.0708191	0.344444	0.0264098	0.132676	0.11683	0.05492	0.0653556	0.0111778	0.0460222	0.0763828	0.0450952	0.05815	0.174238	0.0872252	0.104344	0.060979	0.0176382	0.00656094	0.185099	0.0910796	0.12505	0.0919763	0.0575433	0.0708191	0.344444	0.0286884	0.0382933
2002-12-10	0.181109	0.103893	0.0226639	0.125605	0.164656	0.212267	0.159174	0.25574	0.0835387	0.186012	0.0916231	0.0327111	0.155312	0.356854	0.124503	0.213933	0.166532	0.0919763	0.19928	0.166795	0.274258	0.0579167	0.0708191	0.344444	0.0264098	0.132676	0.11683	0.05492	0.0653556	0.0111778	0.0460222	0.0763828	0.0450952	0.05815	0.174238	0.0872252	0.104344	0.060979	0.0176382	0.00656094	0.185099	0.0910796	0.12505	0.0919763	0.0575433	0.0708191	0.344444	0.0286884	0.0382933
2002-12-11	0.181109	0.103893	0.0226639	0.125605	0.164656	0.212267	0.159174	0.25574	0.0835387	0.186012	0.0916231	0.0327111	0.155312	0.356854	0.124503	0.213933	0.166532	0.0919763	0.19928	0.166795	0.274258	0.0579167	0.0708191	0.344444	0.0264098	0.132676	0.11683	0.05492	0.0653556	0.0111778	0.0460222	0.0763828	0.0450952	0.05815	0.174238	0.0872252	0.104344	0.060979	0.0176382	0.00656094	0.185099	0.0910796	0.12505	0.0919763	0.0575433	0.0708191	0.344444	0.0286884	0.0382933
2002-12-12	0.181109	0.103893	0.0226639	0.125605	0.164656	0.212267	0.159174	0.25574	0.0835387	0.186012	0.0916231	0.0327111	0.155312	0.356854	0.124503	0.213933	0.166532	0.0919763	0.19928	0.166795	0.274258	0.0579167	0.0708191	0.344444	0.0264098	0.132676	0.11683	0.05492	0.0653556	0.0111778	0.0460222	0.0763828	0.0450952	0.05815	0.174238	0.0872252	0.104344	0.060979	0.0176382	0.00656094	0.185099	0.0910796	0.12505	0.0919763	0.0575433	0.0708191	0.344444	0.0286884	0.0382933
2002-12-13	0.181109	0.103893	0.0226639	0.125605	0.164656	0.212267	0.159174	0.25574	0.0835387	0.186012	0.0916231	0.0327111	0.155312	0.356854	0.124503	0.213933	0.166532	0.0919763	0.19928	0.166795	0.274258	0.0579167	0.0708191	0.344444	0.0264098	0.132676	0.11683	0.05492	0.0653556	0.0111778	0.0460222	0.0763828	0.0452286	0.05815	0.174238	0.0872252	0.104344	0.060979	0.0176382	0.00656094	0.185099	0.0910796	0.12505	0.0919763	0.0575433	0.0708191	0.344444	0.0286884	0.0382933
2002-12-14	0.181109	0.103893	0.0226639	0.125605	0.164656	0.212267	0.159174	0.25574	0.0835387	0.186012	0.0916231	0.0327111	0.155312	0.356854	0.124503	0.213933	0.166532	0.0919763	0.19928	0.166795	0.274258	0.0579167	0.0708191	0.344444	0.0264098	0.132676	0.11683	0.05492	0.0653556	0.0111778	0.0460222	0.0763828	0.0452286	0.05815	0.174238	0.0872252	0.104344	0.060979	0.0176382	0.00656094	0.185099	0.0910796	0.12505	0.0919763	0.0575433	0.0708191	0.344444	0.0286884	0.0382933
2002-12-15	0.181109	0.103893	0.0226639	0.125605	0.164656	0.212267	0.159174	0.25574	0.0835387	0.186012	0.0916231	0.0327111	0.155312	0.356854	0.124503	0.213933	0.166532	0.0919763	0.19928	0.166795	0.274258	0.0579167	0.0708191	0.344444	0.0264098	0.132676	0.11683	0.05492	0.0653556	0.0111778	0.0460222	0.0763828	0.0452286	0.05815	0.174238	0.0872252	0.104344	0.060979	0.0176382	0.00656094	0.185099	0.0910796	0.12505	0.0919763	0.0575433	0.0708191	0.344444	0.0286884	0.0382933
2002-12-16	0.181109	0.103893	0.0226639	0.125605	0.164656	0.212267	0.159174	0.25574	0.0835387	0.186012	0.0916231	0.0327111	0.155312	0.356854	0.124503	0.213933	0.166532	0.0919763	0.19928	0.166795	0.274258	0.0579167	0.0708191	0.344444	0.0264098	0.132676	0.11683	0.05492	0.0653556	0.0111778	0.0460222	0.0763828	0.0452286	0.05815	0.174238	0.0872252	0.104344	0.060979	0.0176382	0.00656094	0.185099	0.0910796	0.12505	0.0919763	0.0575433	0.0708191	0.344444	0.0286884	0.0382933
2002-12-17	0.181109	0.103893	0.0226639	0.125605	0.164656	0.212267	0.159174	0.25574	0.0835387	0.186012	0.0916231	0.0327111	0.155312	0.356854	0.124503	0.213933	0.166532	0.0919763	0.19928	0.166795	0.274258	0.0579167	0.0708191	0.344444	0.0264098	0.132676	0.11683	0.05492	0.0653556	0.0111778	0.0460222	0.0763828	0.0452286	0.05815	0.174238	0.0872252	0.104344	0.060979	0.0176382	0.00656094	0.185099	0.0910796	0.12505	0.0919763	0.0575433	0.0708191	0.344444	0.0286884	0.0382933
2002-12-18	0.181109	0.103893	0.0226639	0.125605	0.164656	0.212267	0.159174	0.25574	0.0835387	0.186012	0.0916231	0.0327111	0.155312	0.356854	0.124503	0.213933	0.166532	0.0919763	0.19928	0.166795	0.274258	0.0579167	0.0708191	0.344444	0.0264098	0.132676	0.11683	0.05492	0.0653556	0.0111778	0.0460222	0.0763828	0.0452286	0.05815	0.174238	0.0872252	0.104344	0.060979	0.0176382	0.00656094	0.185099	0.0910796	0.12505	0.0919763	0.0575433	0.0708191	0.344444	0.0286884	0.0382933
2002-12-19	0.181109	0.103893	0.0226639	0.125605	0.164656	0.212267	0.159174	0.25574	0.0835387	0.186012	0.0916231	0.0327111	0.155312	0.356854	0.124503	0.213933	0.166532	0.0919763	0.19928	0.166795	0.274258	0.0579167	0.0708191	0.344444	0.0264098	0.132676	0.11683	0.05492	0.0653556	0.0111778	0.0460222	0.0763828	0.0452286	0.05815	0.174238	0.0872252	0.104344	0.060979	0.0176382	0.00656094	0.185099	0.0910796	0.12505	0.0919763	0.0575433	0.0708191	0.344444	0.0286884	0.0382933
2002-12-20	0.181109	0.103893	0.0226639	0.125605	0.164656	0.212267	0.159174	0.25574	0.0835387	0.186012	0.0916231	0.0327111	0.155312	0.356854	0.124503	0.213933	0.166532	0.0919763	0.19928	0.166795	0.274258	0.0579167	0.0708191	0.344444	0.0264098	0.132676	0.11683	0.05492	0.0653556	0.0111778	0.0460222	0.0763828	0.0452286	0.05815	0.174238	0.0872252	0.104344	0.060979	0.0176382	0.00656094	0.185099	0.0910796	0.12505	0.0919763	0.0575433	0.0708191	0.344444	0.0286884	0.0382933
2002-12-21	0.181109	0.103893	0.0226639	0.125605	0.164656	0.212267	0.159174	0.25574	0.0835387	0.186012	0.0916231	0.0327111	0.155312	0.356854	0.124503	0.213933	0.166532	0.0919763	0.19928	0.166795	0.274258	0.0579167	0.0708191	0.344444	0.0264098	0.132676	0.11683	0.05492	0.0653556	0.0111778	0.0460222	0.0763828	0.0452286	0.05815	0.174238	0.0872252	0.104344	0.060979	0.0176382	0.00656094	0.185099	0.0910796	0.12505	0.0919763	0.0575433	0.0708191	0.344444	0.0286884	0.0382933
2002-12-22	0.181109	0.103893	0.0226639	0.125605	0.164656	0.212267	0.159174	0.25574	0.0835387	0.186012	0.0916231	0.0327111	0.155312	0.356854	0.124503	0.213933	0.166532	0.0919763	0.19928	0.166795	0.274258	0.0579167	0.0708191	0.344444	0.0264098	0.132676	0.11683	0.05492	0.0653556	0.0111778	0.0460222	0.0763828	0.0452286	0.05815	0.174238	0.0872252	0.104344	0.060979	0.0176382	0.00656094	0.185099	0.0910796	0.12505	0.0919763	0.0575433	0.0708191	0.344444	0.0286884	0.0382933
2002-12-23	0.181109	0.103893	0.0226639	0.125605	0.164656	0.212267	0.159174	0.25574	0.0835387	0.186012	0.0916231	0.0327111	0.155312	0.356854	0.124503	0.213933	0.166532	0.0919763	0.19928	0.166795	0.274258	0.0579167	0.0708191	0.344444	0.0264098	0.132676	0.11683	0.05492	0.0653556	0.0111778	0.0460222	0.0763828	0.0452286	0.05815	0.174238	0.0872252	0.104344	0.060979	0.0176382	0.00656094	0.185099	0.0910796	0.12505	0.0919763	0.0575433	0.0708191	0.344444	0.0286884	0.0382933
2002-12-24	0.181109	0.103893	0.0226639	0.125605	0.164656	0.212267	0.159174	0.25574	0.0835387	0.186012	0.0916231	0.0327111	0.155312	0.356854	0.124503	0.213933	0.166532	0.0919763	0.19928	0.166795	0.274258	0.0579167	0.0708191	0.344444	0.0264098	0.132676	0.11683	0.05492	0.0653556	0.0111778	0.0460222	0.0763828	0.0452286	0.05815	0.174238	0.0872252	0.104344	0.060979	0.0176382	0.00656094	0.185099	0.0910796	0.12505	0.0919763	0.0575433	0.0708191	0.344444	0.0286884	0.0382933
2002-12-25	0.181109	0.103893	0.0226639	0.125605	0.164656	0.212267	0.159174	0.25574	0.0835387	0.186012	0.0916231	0.0327111	0.155312	0.356854	0.124503	0.213933	0.166532	0.0919763	0.19928	0.166795	0.274258	0.0579167	0.0708191	0.344444	0.0264098	0.132676	0.11683	0.05492	0.0653556	0.0111778	0.0460222	0.0763828	0.0452286	0.05815	0.174238	0.0872252	0.104344	0.060979	0.0176382	0.00656094	0.185099	0.0910796	0.12505	0.0919763	0.0575433	0.0708191	0.344444	0.0286884	0.0382933
2002-12-26	0.181109	0.103893	0.0226639	0.125605	0.164656	0.212267	0.159174	0.25574	0.0835387	0.186012	0.0916231	0.0327111	0.155312	0.356854	0.124503	0.213933	0.166532	0.0919763	0.19928	0.166795	0.274258	0.0579167	0.0708191	0.344444	0.0279955	0.132676	0.11683	0.05492	0.0653556	0.0111778	0.0460222	0.0763828	0.0452286	0.05815	0.174238	0.0872252	0.104344	0.060979	0.0176382	0.00656094	0.185099	0.0910796	0.12505	0.0919763	0.0575433	0.0708191	0.344444	0.0286884	0.0382933
2002-12-27	0.181109	0.103893	0.0226639	0.125605	0.164656	0.212267	0.159174	0.25574	0.0835387	0.186012	0.0916231	0.0327111	0.155312	0.356854	0.124503	0.213933	0.166532	0.0919763	0.19928	0.166795	0.274258	0.0579167	0.0708191	0.344444	0.0279955	0.132676	0.11683	0.05492	0.0653556	0.0111778	0.0460222	0.0763828	0.0452286	0.05815	0.174238	0.0872252	0.104344	0.060979	0.0176382	0.00656094	0.185099	0.0910796	0.12505	0.0919763	0.0575433	0.0708191	0.344444	0.0286884	0.0382933
2002-12-28	0.181109	0.103893	0.0226639	0.125605	0.164656	0.212267	0.159174	0.25574	0.0835387	0.186012	0.0916231	0.0327111	0.155312	0.356854	0.124503	0.213933	0.166532	0.0919763	0.19928	0.166795	0.274258	0.0579167	0.0708191	0.344444	0.0279955	0.132676	0.11683	0.05492	0.0653556	0.0111778	0.0460222	0.0763828	0.0452286	0.05815	0.174238	0.0872252	0.104344	0.060979	0.0176382	0.00656094	0.185099	0.0910796	0.12505	0.0919763	0.0575433	0.0708191	0.344444	0.0286884	0.0382933
2002-12-29	0.181109	0.103893	0.0226639	0.125605	0.164656	0.212267	0.159174	0.25574	0.0835387	0.186012	0.0916231	0.0327111	0.155312	0.356854	0.124503	0.213933	0.166532	0.0919763	0.19928	0.166795	0.274258	0.0579167	0.0708191	0.344444	0.0279955	0.132676	0.11683	0.05492	0.0653556	0.0111778	0.0460222	0.0763828	0.0452286	0.05815	0.174238	0.0872252	0.104344	0.060979	0.0176382	0.00656094	0.185099	0.0910796	0.12505	0.0919763	0.0575433	0.0708191	0.344444	0.0286884	0.0382933
2002-12-30	0.181109	0.103893	0.0226639	0.125605	0.164656	0.212267	0.159174	0.25574	0.0835387	0.186012	0.0928231	0.0327111	0.155312	0.356854	0.124503	0.213933	0.166532	0.0919763	0.19928	0.166795	0.274258	0.0579167	0.0708191	0.344444	0.0279955	0.132676	0.11683	0.05492	0.0653556	0.0111778	0.0460222	0.0763828	0.0452286	0.05815	0.174238	0.0872252	0.104344	0.060979	0.0176382	0.00656094	0.185099	0.0910796	0.12505	0.0919763	0.0575433	0.0708191	0.344444	0.0286884	0.0382933
2002-12-31	0.181109	0.103893	0.0226639	0.125605	0.164656	0.212267	0.159174	0.25574	0.0835387	0.186012	0.0928231	0.0327111	0.155312	0.356854	0.124503	0.213933	0.166532	0.0919763	0.19928	0.166795	0.274258	0.0579167	0.0708191	0.344444	0.0286884	0.132676	0.11683	0.05492	0.0653556	0.0111778	0.0460222	0.0763828	0.0452286	0.05815	0.174238	0.0872252	0.104344	0.060979	0.0176382	0.00656094	0.185099	0.0910796	0.12505	0.0919763	0.0575433	0.0708191	0.344444	0.0286884	0.0382933
2003-01-01	0.181109	0.103893	0.0226639	0.125605	0.164656	0.212267	0.159174	0.25574	0.0835387	0.186012	0.0928231	0.0327111	0.155312	0.356854	0.124503	0.213933	0.166532	0.0919763	0.19928	0.166795	0.274258	0.0579167	0.0708191	0.344444	0.0286884	0.132676	0.11683	0.05492	0.0653556	0.0111778	0.0460222	0.0763828	0.0452286	0.05815	0.174238	0.0872252	0.104344	0.060979	0.0176382	0.00656094	0.185099	0.0910796	0.12505	0.0919763	0.0575433	0.0708191	0.344444	0.0286884	0.0382933
2003-01-02	0.181109	0.103893	0.0226639	0.125605	0.164656	0.212267	0.159174	0.25574	0.0835387	0.186012	0.0928231	0.0327111	0.155312	0.356854	0.124503	0.213933	0.166532	0.0919763	0.19928	0.166795	0.274258	0.0579167	0.0708191	0.344444	0.0286884	0.132676	0.11683	0.05492	0.0653556	0.0111778	0.0460222	0.0763828	0.0452286	0.05815	0.174238	0.0872252	0.104344	0.060979	0.0176382	0.00656094	0.185099	0.0910796	0.12505	0.0919763	0.0575433	0.0708191	0.344444	0.0286884	0.0382933
2003-01-03	0.181109	0.103893	0.0226639	0.125605	0.164656	0.212267	0.159174	0.25574	0.0835387	0.186012	0.0928231	0.0327111	0.155312	0.356854	0.124503	0.213933	0.166532	0.0919763	0.19928	0.166795	0.274258	0.0579167	0.0708191	0.344444	0.0286884	0.132676	0.11683	0.05492	0.0653556	0.0111778	0.0460222	0.0763828	0.0452286	0.05815	0.174238	0.0872252	0.104344	0.060979	0.0176382	0.00656094	0.185099	0.0910796	0.12505	0.0919763	0.0575433	0.0708191	0.344444	0.0286884	0.0382933
2003-01-04	0.181109	0.103893	0.0226639	0.125605	0.164656	0.212267	0.159174	0.25574	0.0835387	0.186012	0.0928231	0.0327111	0.155312	0.356854	0.124503	0.213933	0.166532	0.0919763	0.19928	0.166795	0.274258	0.0579167	0.0708191	0.344444	0.0286884	0.132676	0.11683	0.05492	0.0653556	0.0111778	0.0460222	0.0763828	0.0452286	0.05815	0.174238	0.0872252	0.104344	0.060979	0.0176382	0.00656094	0.185099	0.0910796	0.12505	0.0919763	0.0575433	0.0708191	0.344444	0.0286884	0.0382933
2003-01-05	0.181109	0.103893	0.0226639	0.125605	0.164656	0.212267	0.159174	0.25574	0.0835387	0.186012	0.0928231	0.0327111	0.155312	0.356854	0.124503	0.213933	0.166532	0.0919763	0.19928	0.166795	0.274258	0.0579167	0.0708191	0.344444	0.0286884	0.132676	0.11683	0.05492	0.0653556	0.0111778	0.0460222	0.0763828	0.0452286	0.05815	0.174238	0.0872252	0.104344	0.060979	0.0176382	0.00656094	0.185099	0.0910796	0.12505	0.0919763	0.0575433	0.0708191	0.344444	0.0286884	0.0382933
2003-01-06	0.181109	0.103893	0.0226639	0.125605	0.164656	0.212267	0.159174	0.25574	0.0835387	0.186012	0.0928231	0.0327111	0.155312	0.356854	0.124503	0.214033	0.166532	0.0919763	0.19928	0.166795	0.274258	0.0579167	0.0708191	0.344444	0.0286884	0.132676	0.11683	0.05492	0.0653556	0.0111778	0.0460222	0.0763828	0.0452286	0.05815	0.174238	0.0872252	0.104344	0.060979	0.0176382	0.00656094	0.185099	0.0910796	0.12505	0.0919763	0.0575433	0.0708191	0.344444	0.0286884	0.0382933
2003-01-07	0.181109	0.103893	0.0226639	0.125605	0.164656	0.212267	0.159174	0.25574	0.0835387	0.186012	0.0928231	0.0327111	0.155312	0.356854	0.124503	0.214033	0.166532	0.0919763	0.19928	0.166795	0.274258	0.0579167	0.0708191	0.344444	0.0286884	0.132676	0.11683	0.05492	0.0653556	0.0111778	0.0460222	0.0763828	0.0452286	0.05815	0.174238	0.0872252	0.104344	0.060979	0.0176382	0.00656094	0.185099	0.0910796	0.12505	0.0919763	0.0575433	0.0708191	0.344444	0.0286884	0.0382933
2003-01-08	0.181109	0.103893	0.0226639	0.125605	0.164656	0.212267	0.159174	0.25574	0.0835387	0.186012	0.0928231	0.0327111	0.155312	0.356854	0.124503	0.214033	0.166532	0.0919763	0.19928	0.166795	0.274258	0.0579167	0.0708191	0.344444	0.0286884	0.132676	0.11683	0.05492	0.0653556	0.0111778	0.0460222	0.0763828	0.0452286	0.05815	0.174238	0.0872252	0.104344	0.060979	0.0176382	0.00656094	0.185099	0.0910796	0.12505	0.0919763	0.0575433	0.0708191	0.344444	0.0286884	0.0382933
2003-01-09	0.181109	0.103893	0.0226639	0.125605	0.164656	0.212267	0.159174	0.25574	0.0835387	0.186012	0.0928231	0.0327111	0.155312	0.356854	0.124503	0.214033	0.166532	0.0919763	0.19928	0.166795	0.274258	0.0579167	0.0708191	0.344444	0.0286884	0.132676	0.11683	0.05492	0.0653556	0.0111778	0.0460222	0.0763828	0.0452286	0.05815	0.174238	0.0872252	0.104344	0.060979	0.0176382	0.00656094	0.185099	0.0910796	0.12505	0.0919763	0.0575433	0.0708191	0.344444	0.0286884	0.0382933
2003-01-10	0.181109	0.103893	0.0226639	0.125605	0.164656	0.212267	0.159174	0.25574	0.0835387	0.186012	0.0928231	0.0327111	0.155312	0.356854	0.124503	0.214033	0.166532	0.0919763	0.19928	0.166795	0.274258	0.0579167	0.0708191	0.344444	0.0286884	0.132676	0.11683	0.05492	0.0653556	0.0111778	0.0460222	0.0763828	0.0452286	0.05815	0.174238	0.0872252	0.104344	0.060979	0.0176382	0.00656094	0.185099	0.0910796	0.12505	0.0919763	0.0575433	0.0708191	0.344444	0.0286884	0.0382933
2003-01-11	0.181109	0.103893	0.0226639	0.125605	0.164656	0.212267	0.159174	0.25574	0.0835387	0.186012	0.0928231	0.0327111	0.155312	0.356854	0.124503	0.214033	0.166532	0.0919763	0.19928	0.166795	0.274258	0.0579167	0.0708191	0.344444	0.0286884	0.132676	0.11683	0.05492	0.0653556	0.0111778	0.0460222	0.0763828	0.0452286	0.05815	0.174238	0.0872252	0.104344	0.060979	0.0176382	0.00656094	0.185099	0.0910796	0.12505	0.0919763	0.0575433	0.0708191	0.344444	0.0286884	0.0382933
2003-01-12	0.181109	0.103893	0.0226639	0.125605	0.164656	0.212267	0.159174	0.25574	0.0835387	0.186012	0.0928231	0.0327111	0.155312	0.356854	0.124503	0.214033	0.166532	0.0919763	0.19928	0.166795	0.274258	0.0579167	0.0708191	0.344444	0.0286884	0.132676	0.11683	0.05492	0.0653556	0.0111778	0.0460222	0.0763828	0.0452286	0.05815	0.174238	0.0872252	0.104344	0.060979	0.0176382	0.00656094	0.185099	0.0910796	0.12505	0.0919763	0.0575433	0.0708191	0.344444	0.0286884	0.0382933
2003-01-13	0.181109	0.103893	0.0226639	0.125605	0.164656	0.212267	0.159174	0.25574	0.0835387	0.186012	0.0928231	0.0327111	0.155312	0.356854	0.124503	0.214033	0.166532	0.0919763	0.19928	0.166795	0.274258	0.0579167	0.0708191	0.344444	0.0286884	0.132676	0.11683	0.05492	0.0653556	0.0111778	0.0460222	0.0763828	0.0452286	0.05815	0.174238	0.0872252	0.104344	0.060979	0.0176382	0.00656094	0.185099	0.0910796	0.12505	0.0919763	0.0575433	0.0708191	0.344444	0.0286884	0.0382933
2003-01-14	0.181109	0.103893	0.0226639	0.125605	0.164656	0.212267	0.159174	0.25574	0.0835387	0.186012	0.0928231	0.0327111	0.155312	0.356854	0.124503	0.214033	0.166532	0.0919763	0.19928	0.166795	0.274258	0.0579167	0.0708191	0.344444	0.0286884	0.132676	0.11683	0.05492	0.0653556	0.0111778	0.0460222	0.0763828	0.0452286	0.05815	0.174238	0.0872252	0.104344	0.060979	0.0176382	0.00656094	0.185099	0.0910796	0.12505	0.0919763	0.0575433	0.0708191	0.344444	0.0286884	0.0382933
2003-01-15	0.181109	0.103893	0.0226639	0.125605	0.164656	0.212267	0.159174	0.25574	0.0835387	0.186012	0.0928231	0.0327111	0.155312	0.356854	0.124503	0.214033	0.166532	0.0919763	0.19928	0.166795	0.274258	0.0579167	0.0708191	0.344444	0.0286884	0.132676	0.11683	0.05492	0.0653556	0.0111778	0.0460222	0.0763828	0.0452286	0.05815	0.174238	0.0872252	0.104344	0.060979	0.0176382	0.00656094	0.185099	0.0910796	0.12505	0.0919763	0.0575433	0.0708191	0.344444	0.0286884	0.0382933
2003-01-16	0.181109	0.103893	0.0226639	0.125605	0.164656	0.212267	0.159174	0.25574	0.0835387	0.186012	0.0928231	0.0327111	0.155312	0.356854	0.124503	0.214033	0.166532	0.0919763	0.19928	0.166795	0.274258	0.0579167	0.0708191	0.344444	0.0286884	0.132676	0.11683	0.05492	0.0653556	0.0111778	0.0460222	0.0763828	0.0452286	0.05815	0.174238	0.0872252	0.104344	0.060979	0.0176382	0.00656094	0.185099	0.0910796	0.12505	0.0919763	0.0575433	0.0708191	0.344444	0.0286884	0.0382933
2003-01-17	0.181109	0.103893	0.0226639	0.125605	0.164656	0.212267	0.159174	0.25574	0.0835387	0.186012	0.0928231	0.0327111	0.155312	0.356854	0.124503	0.214033	0.166532	0.0919763	0.19928	0.166795	0.274258	0.0579167	0.0708191	0.344444	0.0286884	0.132676	0.11683	0.05492	0.0653556	0.0111778	0.0460222	0.0763828	0.0452286	0.05815	0.174238	0.0872252	0.104344	0.060979	0.0176382	0.00656094	0.185099	0.0910796	0.12505	0.0919763	0.0575433	0.0708191	0.344444	0.0286884	0.0382933
2003-01-18	0.181109	0.103893	0.0226639	0.125605	0.164656	0.212267	0.159174	0.25574	0.0835387	0.186012	0.0928231	0.0327111	0.155312	0.356854	0.124503	0.214033	0.166532	0.0919763	0.19928	0.166795	0.274258	0.0579167	0.0708191	0.344444	0.0286884	0.132676	0.11683	0.05492	0.0653556	0.0111778	0.0460222	0.0763828	0.0452286	0.05815	0.174238	0.0872252	0.104344	0.060979	0.0176382	0.00656094	0.185099	0.0910796	0.12505	0.0919763	0.0575433	0.0708191	0.344444	0.0286884	0.0382933
2003-01-19	0.181109	0.103893	0.0226639	0.125605	0.164656	0.212267	0.159174	0.25574	0.0835387	0.186012	0.0928231	0.0327111	0.151312	0.356854	0.124503	0.214033	0.166532	0.0919763	0.19928	0.166795	0.274258	0.0579167	0.0708191	0.344444	0.0286884	0.132676	0.11683	0.05492	0.0653556	0.0111778	0.0460222	0.0763828	0.0452286	0.05815	0.174238	0.0872252	0.104344	0.060979	0.0176382	0.00656094	0.185099	0.0910796	0.12505	0.0919763	0.0575433	0.0708191	0.344444	0.0286884	0.0382933
2003-01-20	0.181109	0.103893	0.0226639	0.125605	0.164656	0.212267	0.159174	0.25574	0.0835387	0.186012	0.0928231	0.0327111	0.151312	0.356854	0.124503	0.214033	0.166532	0.0919763	0.19928	0.166795	0.274258	0.0579167	0.0708191	0.344444	0.0286884	0.132676	0.11683	0.05492	0.0653556	0.0111778	0.0460222	0.0763828	0.0452286	0.05815	0.174238	0.0872252	0.104344	0.060979	0.0176382	0.00656094	0.185099	0.0910796	0.12505	0.0919763	0.0575433	0.0708191	0.344444	0.0286884	0.0382933
2003-01-21	0.181109	0.103893	0.0226639	0.125605	0.164656	0.212267	0.159174	0.25574	0.0835387	0.186012	0.0928231	0.0327111	0.151312	0.356854	0.124503	0.214033	0.166532	0.0919763	0.19928	0.166795	0.274258	0.0579167	0.0708191	0.344444	0.0286884	0.132676	0.11683	0.05492	0.0653556	0.0111778	0.0460222	0.0763828	0.0452286	0.05815	0.174238	0.0872252	0.104344	0.060979	0.0176382	0.00656094	0.185099	0.0910796	0.12505	0.0919763	0.0575433	0.0708191	0.344444	0.0286884	0.0382933
2003-01-22	0.181109	0.103893	0.0226639	0.125605	0.164656	0.212267	0.159174	0.25574	0.0835387	0.186012	0.0928231	0.0327111	0.151312	0.356854	0.124503	0.214033	0.166532	0.0919763	0.19928	0.166795	0.274258	0.0579167	0.0708191	0.344444	0.0286884	0.132676	0.11683	0.05492	0.0653556	0.0111778	0.0460222	0.0763828	0.0452286	0.05815	0.174238	0.0872252	0.104344	0.060979	0.0176382	0.00656094	0.185099	0.0910796	0.12505	0.0919763	0.0575433	0.0708191	0.344444	0.0286884	0.0382933
2003-01-23	0.181109	0.103893	0.0226639	0.125605	0.164656	0.212267	0.159174	0.25574	0.0835387	0.186012	0.0928231	0.0327111	0.151312	0.356854	0.124503	0.214033	0.166532	0.0919763	0.19928	0.166795	0.274258	0.0579167	0.0708191	0.344444	0.0286884	0.132676	0.11683	0.05492	0.0653556	0.0111778	0.0460222	0.0763828	0.0452286	0.05815	0.174238	0.0872252	0.104344	0.060979	0.0176382	0.00656094	0.185099	0.0910796	0.12505	0.0919763	0.0575433	0.0708191	0.344444	0.0286884	0.0382933
2003-01-24	0.181109	0.103893	0.0226639	0.125605	0.164656	0.212267	0.159174	0.25574	0.0835387	0.186012	0.0928231	0.0327111	0.151312	0.356854	0.124503	0.214033	0.166532	0.0919763	0.19928	0.166795	0.274258	0.0579167	0.0708191	0.344444	0.0286884	0.132676	0.11683	0.05492	0.0653556	0.0111778	0.0460222	0.0763828	0.0452286	0.05815	0.174238	0.0872252	0.104344	0.060979	0.0176382	0.00656094	0.185099	0.0910796	0.12505	0.0919763	0.0575433	0.0708191	0.344444	0.0286884	0.0382933
2003-01-25	0.181109	0.103893	0.0226639	0.125605	0.164656	0.212267	0.159174	0.25574	0.0835387	0.186012	0.0928231	0.0327111	0.151312	0.356854	0.124503	0.214033	0.166532	0.0919763	0.19928	0.166795	0.274258	0.0579167	0.0708191	0.344444	0.0286884	0.132676	0.11683	0.05492	0.0653556	0.0111778	0.0460222	0.0763828	0.0452286	0.05815	0.174238	0.0872252	0.104344	0.060979	0.0176382	0.00656094	0.185099	0.0910796	0.12505	0.0919763	0.0575433	0.0708191	0.344444	0.0286884	0.0382933
2003-01-26	0.181109	0.103893	0.0226639	0.125605	0.164656	0.212267	0.159174	0.25574	0.0835387	0.186012	0.0928231	0.0327111	0.151312	0.356854	0.124503	0.214033	0.166532	0.0919763	0.19928	0.166795	0.274258	0.0579167	0.0708191	0.344444	0.0286884	0.132676	0.11683	0.05492	0.0653556	0.0111778	0.0460222	0.0763828	0.0452286	0.05815	0.174238	0.0872252	0.104344	0.060979	0.0176382	0.00656094	0.185099	0.0910796	0.12505	0.0919763	0.0575433	0.0708191	0.344444	0.0286884	0.0382933
2003-01-27	0.181109	0.103893	0.0226639	0.125605	0.164656	0.212267	0.159174	0.25574	0.0835387	0.186012	0.0928231	0.0327111	0.151312	0.356854	0.124503	0.214033	0.166532	0.0919763	0.19928	0.166795	0.274258	0.0579167	0.0708191	0.344444	0.0286884	0.132676	0.11683	0.05492	0.0653556	0.0111778	0.0460222	0.0763828	0.0452286	0.05815	0.174238	0.0872252	0.104344	0.060979	0.0176382	0.00656094	0.185099	0.0910796	0.12505	0.0919763	0.0575433	0.0708191	0.344444	0.0286884	0.0382933
2003-01-28	0.181109	0.103893	0.0226639	0.125605	0.164656	0.212267	0.159174	0.25574	0.0835387	0.186012	0.0928231	0.0327111	0.151312	0.356854	0.124503	0.214033	0.166532	0.0919763	0.19928	0.166795	0.274258	0.0579167	0.0708191	0.344444	0.0286884	0.132676	0.11683	0.05492	0.0653556	0.0111778	0.0460222	0.0763828	0.0452286	0.05815	0.174238	0.0872252	0.104344	0.060979	0.0176382	0.00656094	0.185099	0.0910796	0.12505	0.0919763	0.0575433	0.0708191	0.344444	0.0286884	0.0382933
2003-01-29	0.181109	0.103893	0.0226639	0.125605	0.164656	0.212267	0.159174	0.25574	0.0835387	0.186012	0.0928231	0.0327111	0.151312	0.356854	0.124503	0.214033	0.166532	0.0919763	0.19928	0.166795	0.274258	0.0579167	0.0708191	0.344444	0.0286884	0.132676	0.11683	0.05492	0.0653556	0.0111778	0.0460222	0.0763828	0.0452286	0.05815	0.174238	0.0872252	0.104344	0.060979	0.0176382	0.00656094	0.185099	0.0910796	0.12505	0.0919763	0.0575433	0.0708191	0.344444	0.0286884	0.0382933
2003-01-30	0.181109	0.103893	0.0226639	0.125605	0.164656	0.212267	0.159174	0.25574	0.0835387	0.186012	0.0928231	0.0327111	0.151312	0.356854	0.124503	0.214033	0.166532	0.0919763	0.19928	0.166795	0.274258	0.0579167	0.0708191	0.344444	0.0286884	0.132676	0.11683	0.05492	0.0653556	0.0111778	0.0460222	0.0763828	0.0452286	0.05815	0.174238	0.0872252	0.104344	0.060979	0.0176382	0.00656094	0.185099	0.0910796	0.12505	0.0919763	0.0575433	0.0708191	0.344444	0.0286884	0.0382933
2003-01-31	0.181109	0.103893	0.0226639	0.125605	0.164656	0.212267	0.159174	0.25574	0.0835387	0.186012	0.0928231	0.0327111	0.151312	0.356854	0.124503	0.214033	0.166532	0.0919763	0.19928	0.166795	0.274258	0.0579167	0.0708191	0.344444	0.0286884	0.132676	0.11683	0.05492	0.0653556	0.0111778	0.0460222	0.0763828	0.0452286	0.05815	0.174238	0.0872252	0.104344	0.060979	0.0176382	0.00656094	0.185099	0.0910796	0.12505	0.0919763	0.0575433	0.0708191	0.344444	0.0286884	0.0382933
2003-02-01	0.181109	0.103893	0.0226639	0.125605	0.164656	0.212267	0.159174	0.25574	0.0835387	0.186012	0.0928231	0.0327111	0.151312	0.356854	0.124503	0.214033	0.166532	0.0919763	0.19928	0.166795	0.274258	0.0579167	0.0708191	0.344444	0.0286884	0.132676	0.11683	0.05492	0.0653556	0.0111778	0.0460222	0.0763828	0.0452286	0.05815	0.174238	0.0872252	0.104344	0.060979	0.0176382	0.00656094	0.185099	0.0910796	0.12505	0.0919763	0.0575433	0.0708191	0.344444	0.0286884	0.0382933
2003-02-02	0.181109	0.103893	0.0226639	0.125605	0.164656	0.212267	0.159174	0.25574	0.0835387	0.186012	0.0928231	0.0327111	0.151312	0.356854	0.124503	0.214033	0.166532	0.0919763	0.19928	0.166795	0.274258	0.0579167	0.0708191	0.344444	0.0286884	0.132676	0.11683	0.05492	0.0653556	0.0111778	0.0460222	0.0763828	0.0452286	0.05815	0.174238	0.0872252	0.104344	0.060979	0.0176382	0.00656094	0.185099	0.0910796	0.12505	0.0919763	0.0575433	0.0708191	0.344444	0.0286884	0.0382933
2003-02-03	0.181109	0.103893	0.0226639	0.125605	0.164656	0.212267	0.159174	0.25574	0.0835387	0.186012	0.0928231	0.0327111	0.151312	0.356854	0.124503	0.214033	0.166532	0.0919763	0.19928	0.166795	0.274258	0.0579167	0.0708191	0.344444	0.0286884	0.132676	0.11683	0.05492	0.0653556	0.0111778	0.0460222	0.0763828	0.0452286	0.05815	0.174238	0.0872252	0.104344	0.060979	0.0176382	0.00656094	0.185099	0.0910796	0.12505	0.0919763	0.0575433	0.0708191	0.344444	0.0286884	0.0382933
2003-02-04	0.181109	0.103893	0.0226639	0.125605	0.164656	0.212267	0.159174	0.25574	0.0835387	0.186012	0.0928231	0.0327111	0.151312	0.356854	0.124503	0.214033	0.166532	0.0919763	0.19928	0.166795	0.274258	0.0579167	0.0708191	0.344444	0.0286884	0.132676	0.11683	0.05492	0.0653556	0.0111778	0.0460222	0.0763828	0.0452286	0.05815	0.174238	0.0872252	0.104344	0.060979	0.0176382	0.00656094	0.185099	0.0910796	0.12505	0.0919763	0.0575433	0.0708191	0.344444	0.0286884	0.0382933
2003-02-05	0.181109	0.103893	0.0226639	0.125605	0.164656	0.212267	0.159174	0.25574	0.0835387	0.186012	0.0928231	0.0327111	0.151312	0.356854	0.124503	0.214033	0.166532	0.0919763	0.19928	0.166795	0.274258	0.0579167	0.0708191	0.344444	0.0286884	0.132676	0.11683	0.05492	0.0653556	0.0111778	0.0460222	0.0763828	0.0452286	0.05815	0.174238	0.0872252	0.104344	0.060979	0.0176382	0.00656094	0.185099	0.0910796	0.12505	0.0919763	0.0575433	0.0708191	0.344444	0.0286884	0.0382933
2003-02-06	0.181109	0.103893	0.0226639	0.125605	0.164656	0.212267	0.159174	0.25574	0.0835387	0.186012	0.0928231	0.0327111	0.151312	0.356854	0.124503	0.214033	0.166532	0.0919763	0.19928	0.166795	0.274258	0.0579167	0.0708191	0.344444	0.0286884	0.132676	0.11683	0.05492	0.0653556	0.0111778	0.0460222	0.0763828	0.0452286	0.05815	0.174238	0.0872252	0.104344	0.060979	0.0176382	0.00656094	0.185099	0.0910796	0.12505	0.0919763	0.0575433	0.0708191	0.344444	0.0286884	0.0382933
2003-02-07	0.181109	0.103893	0.0226639	0.125605	0.164656	0.212267	0.159174	0.25574	0.0835387	0.186012	0.0928231	0.0327111	0.151312	0.356854	0.124503	0.214033	0.166532	0.0919763	0.19928	0.166795	0.274258	0.0579167	0.0708191	0.344444	0.0286884	0.132676	0.11683	0.05492	0.0653556	0.0111778	0.0460222	0.0763828	0.0452286	0.05815	0.174238	0.0872252	0.104344	0.060979	0.0176382	0.00656094	0.185099	0.0910796	0.12505	0.0919763	0.0575433	0.0708191	0.344444	0.0286884	0.0382933
2003-02-08	0.181109	0.103893	0.0226639	0.125605	0.164656	0.212267	0.159174	0.25574	0.0835387	0.186012	0.0928231	0.0327111	0.151312	0.356854	0.124503	0.214033	0.166532	0.0919763	0.19928	0.166795	0.274258	0.0579167	0.0708191	0.344444	0.0286884	0.132676	0.11683	0.05492	0.0653556	0.0111778	0.0460222	0.0763828	0.0452286	0.05815	0.174238	0.0872252	0.104344	0.060979	0.0176382	0.00656094	0.185099	0.0910796	0.12505	0.0919763	0.0575433	0.0708191	0.344444	0.0286884	0.0382933
2003-02-09	0.181109	0.103893	0.0226639	0.125605	0.164656	0.212267	0.159174	0.25574	0.0835387	0.186012	0.0928231	0.0327111	0.151312	0.356854	0.124503	0.214033	0.166532	0.0919763	0.19928	0.166795	0.274258	0.0579167	0.0708191	0.344444	0.0286884	0.132676	0.11683	0.05492	0.0653556	0.0111778	0.0460222	0.0763828	0.0452286	0.05815	0.174238	0.0872252	0.104344	0.060979	0.0176382	0.00656094	0.185099	0.0910796	0.12505	0.0919763	0.0575433	0.0708191	0.344444	0.0286884	0.0382933
2003-02-10	0.181109	0.103893	0.0226639	0.125605	0.164656	0.212267	0.159174	0.25574	0.0835387	0.186012	0.0928231	0.0327111	0.151312	0.356854	0.124503	0.214033	0.166532	0.0919763	0.19928	0.166795	0.274258	0.0579167	0.0708191	0.344444	0.0286884	0.132676	0.11683	0.05492	0.0653556	0.0111778	0.0460222	0.0763828	0.0452286	0.05815	0.174238	0.0872252	0.104344	0.060979	0.0176382	0.00656094	0.185099	0.0910796	0.12505	0.0919763	0.0575433	0.0708191	0.344444	0.0286884	0.0382933
2003-02-11	0.181109	0.103893	0.0226639	0.125605	0.164656	0.212267	0.159174	0.25574	0.0835387	0.186012	0.0928231	0.0327111	0.151312	0.356854	0.124503	0.214033	0.166532	0.0919763	0.19928	0.166795	0.274258	0.0579167	0.0708191	0.344444	0.0286884	0.132676	0.11683	0.05492	0.0653556	0.0111778	0.0460222	0.0763828	0.0452286	0.05815	0.174238	0.0872252	0.104344	0.060979	0.0176382	0.00656094	0.185099	0.0910796	0.12505	0.0919763	0.0575433	0.0708191	0.344444	0.0286884	0.0382933
2003-02-12	0.181109	0.103893	0.0226639	0.125605	0.164656	0.212267	0.159174	0.25574	0.0835387	0.186012	0.0928231	0.0327111	0.151312	0.356854	0.124503	0.214033	0.166532	0.0919763	0.19928	0.166795	0.274258	0.0579167	0.0708191	0.344444	0.0286884	0.132676	0.11683	0.05492	0.0653556	0.0111778	0.0460222	0.0763828	0.0452286	0.05815	0.174238	0.0872252	0.104344	0.060979	0.0176382	0.00656094	0.185099	0.0910796	0.12505	0.0919763	0.0575433	0.0708191	0.344444	0.0286884	0.0382933
2003-02-13	0.181109	0.103893	0.0226639	0.125605	0.164656	0.212267	0.159174	0.25574	0.0835387	0.186012	0.0928231	0.0327111	0.151312	0.356854	0.124503	0.214033	0.166532	0.0919763	0.19928	0.166795	0.274258	0.0579167	0.0708191	0.344444	0.0286884	0.132676	0.11683	0.05492	0.0653556	0.0111778	0.0460222	0.0763828	0.0452286	0.05815	0.174238	0.0872252	0.104344	0.060979	0.0176382	0.00656094	0.185099	0.0910796	0.12505	0.0919763	0.0575433	0.0708191	0.344444	0.0286884	0.0382933
2003-02-14	0.181109	0.103893	0.0226639	0.125605	0.164656	0.212267	0.159174	0.25574	0.0835387	0.186012	0.0928231	0.0327111	0.151312	0.356854	0.124503	0.214033	0.166532	0.0919763	0.19928	0.166795	0.274258	0.0579167	0.0708191	0.344444	0.0286884	0.132676	0.11683	0.05492	0.0653556	0.0111778	0.0460222	0.0763828	0.0452286	0.05815	0.174238	0.0872252	0.104344	0.060979	0.0176382	0.00656094	0.185099	0.0910796	0.12505	0.0919763	0.0575433	0.0708191	0.344444	0.0286884	0.0382933
2003-02-15	0.181109	0.103893	0.0226639	0.125605	0.164656	0.212267	0.159174	0.25574	0.0835387	0.186012	0.0928231	0.0327111	0.151312	0.356854	0.124503	0.214033	0.166532	0.0919763	0.19928	0.166795	0.274258	0.0579167	0.0708191	0.344444	0.0286884	0.132676	0.11683	0.05492	0.0653556	0.0111778	0.0460222	0.0763828	0.0452286	0.05815	0.174238	0.0872252	0.104344	0.060979	0.0176382	0.00656094	0.185099	0.0910796	0.12505	0.0919763	0.0575433	0.0708191	0.344444	0.0286884	0.0382933
2003-02-16	0.181109	0.103893	0.0226639	0.125605	0.164656	0.212267	0.159174	0.25574	0.0835387	0.186012	0.0928231	0.0327111	0.151312	0.356854	0.124503	0.214033	0.166532	0.0919763	0.19928	0.166795	0.274258	0.0579167	0.0708191	0.344444	0.0286884	0.132676	0.11683	0.05492	0.0653556	0.0111778	0.0460222	0.0763828	0.0452286	0.05815	0.174238	0.0872252	0.104344	0.060979	0.0176382	0.00656094	0.185099	0.0910796	0.12505	0.0919763	0.0575433	0.0708191	0.344444	0.0286884	0.0382933
2003-02-17	0.181109	0.103893	0.0226639	0.125605	0.164656	0.212267	0.159174	0.25574	0.0835387	0.186012	0.0928231	0.0327111	0.151312	0.356854	0.124503	0.214033	0.166532	0.0919763	0.19928	0.166795	0.274258	0.0579167	0.0708191	0.344444	0.0286884	0.132676	0.11683	0.05492	0.0653556	0.0111778	0.0460222	0.0763828	0.0452286	0.05815	0.174238	0.0872252	0.104344	0.060979	0.0176382	0.00656094	0.185099	0.0910796	0.12505	0.0919763	0.0575433	0.0708191	0.344444	0.0286884	0.0382933
2003-02-18	0.181109	0.103893	0.0226639	0.125605	0.164656	0.212267	0.159174	0.25574	0.0835387	0.186012	0.0928231	0.0327111	0.151312	0.356854	0.124503	0.214033	0.166532	0.0919763	0.19928	0.166795	0.274258	0.0579167	0.0708191	0.344444	0.0286884	0.132676	0.11683	0.05492	0.0653556	0.0111778	0.0460222	0.0763828	0.0452286	0.05815	0.174238	0.0872252	0.104344	0.060979	0.0176382	0.00656094	0.185099	0.0910796	0.12505	0.0919763	0.0575433	0.0708191	0.344444	0.0286884	0.0382933
2003-02-19	0.181109	0.103893	0.0226639	0.125605	0.164656	0.212267	0.159174	0.25574	0.0835387	0.186012	0.0928231	0.0327111	0.151312	0.356854	0.124503	0.214033	0.166532	0.0919763	0.19928	0.166795	0.274258	0.0579167	0.0708191	0.344444	0.0286884	0.132676	0.11683	0.05492	0.0653556	0.0111778	0.0460222	0.0763828	0.0452286	0.05815	0.174238	0.0872252	0.104344	0.060979	0.0176382	0.00656094	0.185099	0.0910796	0.12505	0.0919763	0.0575433	0.0708191	0.344444	0.0286884	0.0382933
2003-02-20	0.181109	0.103893	0.0226639	0.125605	0.164656	0.212267	0.159174	0.25574	0.0835387	0.186012	0.0928231	0.0327111	0.151312	0.356854	0.124503	0.214033	0.166532	0.0919763	0.19928	0.166795	0.274258	0.0579167	0.0708191	0.344444	0.0286884	0.132676	0.11683	0.05492	0.0653556	0.0111778	0.0460222	0.0763828	0.0452286	0.05815	0.174238	0.0872252	0.104344	0.060979	0.0176382	0.00656094	0.185099	0.0910796	0.12505	0.0919763	0.0575433	0.0708191	0.344444	0.0286884	0.0382933
2003-02-21	0.181109	0.103893	0.0226639	0.125605	0.164656	0.212267	0.159174	0.25574	0.0835387	0.186012	0.0928231	0.0327111	0.151312	0.356854	0.124503	0.214033	0.166532	0.0919763	0.19928	0.166795	0.274258	0.0579167	0.0708191	0.344444	0.0286884	0.132676	0.11683	0.05492	0.0653556	0.0111778	0.0460222	0.0763828	0.0452286	0.05815	0.174238	0.0872252	0.104344	0.060979	0.0176382	0.00656094	0.185099	0.0910796	0.12505	0.0919763	0.0575433	0.0708191	0.344444	0.0286884	0.0382933
2003-02-22	0.181109	0.103893	0.0226639	0.125605	0.164656	0.212267	0.159174	0.25574	0.0835387	0.186012	0.0928231	0.0327111	0.151312	0.356854	0.124503	0.214033	0.166532	0.0919763	0.19928	0.166795	0.274258	0.0579167	0.0708191	0.344444	0.0286884	0.132676	0.11683	0.05492	0.0653556	0.0111778	0.0460222	0.0763828	0.0452286	0.05815	0.174238	0.0872252	0.104344	0.060979	0.0176382	0.00656094	0.185099	0.0910796	0.12505	0.0919763	0.0575433	0.0708191	0.344444	0.0286884	0.0382933
2003-02-23	0.181109	0.103893	0.0226639	0.125605	0.164656	0.212267	0.159174	0.25574	0.0835387	0.186012	0.0928231	0.0327111	0.151312	0.356854	0.124503	0.214033	0.166532	0.0919763	0.19928	0.166795	0.274258	0.0579167	0.0708191	0.344444	0.0286884	0.132676	0.11683	0.05492	0.0653556	0.0111778	0.0460222	0.0763828	0.0452286	0.05815	0.174238	0.0872252	0.104344	0.060979	0.0176382	0.00656094	0.185099	0.0910796	0.12505	0.0919763	0.0575433	0.0708191	0.344444	0.0286884	0.0382933
2003-02-24	0.181109	0.103893	0.0226639	0.125605	0.164656	0.212267	0.159174	0.25574	0.0835387	0.186012	0.0928231	0.0327111	0.151312	0.356854	0.124503	0.214033	0.166532	0.0919763	0.19928	0.166795	0.274258	0.0579167	0.0708191	0.344444	0.0286884	0.132676	0.11683	0.05492	0.0653556	0.0111778	0.0460222	0.0763828	0.0452286	0.05815	0.174238	0.0872252	0.104344	0.060979	0.0176382	0.00656094	0.185099	0.0910796	0.12505	0.0919763	0.0575433	0.0708191	0.344444	0.0286884	0.0382933
2003-02-25	0.181109	0.103893	0.0226639	0.125605	0.164656	0.212267	0.159174	0.25574	0.0835387	0.186012	0.0928231	0.0327111	0.151312	0.356854	0.124503	0.214033	0.166532	0.0919763	0.19928	0.166795	0.274258	0.0579167	0.0708191	0.344444	0.0286884	0.132676	0.11683	0.05492	0.0653556	0.0111778	0.0460222	0.0763828	0.0452286	0.05815	0.174238	0.0872252	0.104344	0.060979	0.0176382	0.00656094	0.185099	0.0910796	0.12505	0.0919763	0.0575433	0.0708191	0.344444	0.0286884	0.0382933
2003-02-26	0.181109	0.103893	0.0226639	0.125605	0.164656	0.212267	0.159174	0.25574	0.0835387	0.186012	0.0928231	0.0327111	0.151312	0.356854	0.124503	0.214033	0.166532	0.0919763	0.19928	0.166795	0.274258	0.0579167	0.0708191	0.344444	0.0286884	0.132676	0.11683	0.05492	0.0653556	0.0111778	0.0460222	0.0763828	0.0452286	0.05815	0.174238	0.0872252	0.104344	0.060979	0.0176382	0.00656094	0.185099	0.0910796	0.12505	0.0919763	0.0575433	0.0708191	0.344444	0.0286884	0.0382933
2003-02-27	0.181109	0.103893	0.0226639	0.125605	0.164656	0.212267	0.159174	0.25574	0.0835387	0.186012	0.0928231	0.0327111	0.151312	0.356854	0.124503	0.214033	0.166532	0.0919763	0.19928	0.166795	0.274258	0.0579167	0.0708191	0.344444	0.0286884	0.132676	0.11683	0.05492	0.0653556	0.0111778	0.0460222	0.0763828	0.0452286	0.05815	0.174238	0.0872252	0.104344	0.060979	0.0176382	0.00656094	0.185099	0.0910796	0.12505	0.0919763	0.0575433	0.0708191	0.344444	0.0286884	0.0382933
2003-02-28	0.181109	0.103893	0.0226639	0.125605	0.164656	0.212267	0.159174	0.25574	0.0835387	0.186012	0.0928231	0.0327111	0.151312	0.356854	0.124503	0.214033	0.166532	0.0919763	0.19928	0.166795	0.274258	0.0579167	0.0708191	0.344444	0.0286884	0.132676	0.11683	0.05492	0.0653556	0.0111778	0.0460222	0.0763828	0.0452286	0.05815	0.174238	0.0872252	0.104344	0.060979	0.0176382	0.00656094	0.185099	0.0910796	0.12505	0.0919763	0.0575433	0.0708191	0.344444	0.0286884	0.0382933
2003-03-01	0.181109	0.103893	0.0226639	0.125605	0.164656	0.212267	0.159174	0.25574	0.0835387	0.186012	0.0928231	0.0327111	0.151312	0.356854	0.124503	0.214033	0.166532	0.0919763	0.19928	0.166795	0.274258	0.0579167	0.0708191	0.344444	0.0286884	0.132676	0.11683	0.05492	0.0653556	0.0111778	0.0460222	0.0763828	0.0452286	0.05815	0.174238	0.0872252	0.104344	0.060979	0.0176382	0.00656094	0.185099	0.0910796	0.12505	0.0919763	0.0575433	0.0708191	0.344444	0.0286884	0.0382933
2003-03-02	0.181109	0.103893	0.0226639	0.125605	0.164656	0.212267	0.159174	0.25574	0.0835387	0.186012	0.0928231	0.0327111	0.151312	0.356854	0.124503	0.214033	0.166532	0.0919763	0.19928	0.166795	0.274258	0.0579167	0.0708191	0.344444	0.0286884	0.132676	0.11683	0.05492	0.0653556	0.0111778	0.0460222	0.0763828	0.0452286	0.05815	0.174238	0.0872252	0.104344	0.060979	0.0176382	0.00656094	0.185099	0.0910796	0.12505	0.0919763	0.0575433	0.0708191	0.344444	0.0286884	0.0382933
2003-03-03	0.181109	0.103893	0.0226639	0.125605	0.164656	0.212267	0.159174	0.25574	0.0835387	0.186012	0.0928231	0.0327111	0.151312	0.356854	0.124503	0.214033	0.166532	0.0919763	0.19928	0.166795	0.274258	0.0579167	0.0708191	0.344444	0.0286884	0.132676	0.11683	0.05492	0.0653556	0.0111778	0.0460222	0.0763828	0.0452286	0.05815	0.174238	0.0872252	0.104344	0.060979	0.0176382	0.00656094	0.185099	0.0910796	0.12505	0.0919763	0.0575433	0.0708191	0.344444	0.0286884	0.0382933
2003-03-04	0.181109	0.103893	0.0226639	0.125605	0.164656	0.212267	0.159174	0.25574	0.0835387	0.186012	0.0928231	0.0327111	0.151312	0.356854	0.124503	0.214033	0.166532	0.0919763	0.19928	0.166795	0.274258	0.0579167	0.0708191	0.344444	0.0286884	0.132676	0.11683	0.05492	0.0653556	0.0111778	0.0460222	0.0763828	0.0452286	0.05815	0.174238	0.0872252	0.104344	0.060979	0.0176382	0.00656094	0.185099	0.0910796	0.12505	0.0919763	0.0575433	0.0708191	0.344444	0.0286884	0.0382933
2003-03-05	0.181109	0.103893	0.0226639	0.125605	0.164656	0.212267	0.159174	0.25574	0.0835387	0.186012	0.0928231	0.0327111	0.151312	0.356854	0.124503	0.214033	0.166532	0.0919763	0.19928	0.166795	0.274258	0.0579167	0.0708191	0.344444	0.0286884	0.132676	0.11683	0.05492	0.0653556	0.0111778	0.0460222	0.0763828	0.0452286	0.05815	0.174238	0.0872252	0.104344	0.060979	0.0176382	0.00656094	0.185099	0.0910796	0.12505	0.0919763	0.0575433	0.0708191	0.344444	0.0286884	0.0382933
2003-03-06	0.181109	0.103893	0.0226639	0.125605	0.164656	0.212267	0.159174	0.25574	0.0835387	0.186012	0.0928231	0.0327111	0.151312	0.356854	0.124503	0.214033	0.166532	0.0919763	0.19928	0.166795	0.274258	0.0579167	0.0708191	0.344444	0.0286884	0.132676	0.11683	0.05492	0.0653556	0.0111778	0.0460222	0.0763828	0.0452286	0.05815	0.174238	0.0872252	0.104344	0.060979	0.0176382	0.00656094	0.185099	0.0910796	0.12505	0.0919763	0.0575433	0.0708191	0.344444	0.0286884	0.0382933
2003-03-07	0.181109	0.103893	0.0226639	0.125605	0.164656	0.212267	0.159174	0.25574	0.0835387	0.186012	0.0928231	0.0327111	0.151312	0.356854	0.124503	0.214033	0.166532	0.0919763	0.19928	0.166795	0.274258	0.0579167	0.0708191	0.344444	0.0286884	0.132676	0.11683	0.05492	0.0653556	0.0111778	0.0460222	0.0763828	0.0452286	0.05815	0.174238	0.0872252	0.104344	0.060979	0.0176382	0.00656094	0.185099	0.0910796	0.12505	0.0919763	0.0575433	0.0708191	0.344444	0.0286884	0.0382933
2003-03-08	0.181109	0.103893	0.0226639	0.125605	0.164656	0.212267	0.159174	0.25574	0.0835387	0.186012	0.0928231	0.0327111	0.151312	0.356854	0.124503	0.214033	0.166532	0.0919763	0.19928	0.166795	0.274258	0.0579167	0.0708191	0.344444	0.0286884	0.132676	0.11683	0.05492	0.0653556	0.0111778	0.0460222	0.0763828	0.0452286	0.05815	0.174238	0.0872252	0.104344	0.060979	0.0176382	0.00656094	0.185099	0.0910796	0.12505	0.0919763	0.0575433	0.0708191	0.344444	0.0286884	0.0382933
2003-03-09	0.181109	0.103893	0.0226639	0.125605	0.164656	0.212267	0.159174	0.25574	0.0835387	0.186012	0.0928231	0.0327111	0.151312	0.356854	0.124503	0.214033	0.166532	0.0919763	0.19928	0.166795	0.274258	0.0579167	0.0708191	0.344444	0.0286884	0.132676	0.11683	0.05492	0.0653556	0.0111778	0.0460222	0.0763828	0.0452286	0.05815	0.174238	0.0872252	0.104344	0.060979	0.0176382	0.00656094	0.185099	0.0910796	0.12505	0.0919763	0.0575433	0.0708191	0.344444	0.0286884	0.0382933
2003-03-10	0.181109	0.103893	0.0226639	0.125605	0.164656	0.212267	0.159174	0.25574	0.0835387	0.186012	0.0928231	0.0327111	0.151312	0.356854	0.124503	0.214033	0.166532	0.0919763	0.19928	0.166795	0.274258	0.0579167	0.0708191	0.344444	0.0286884	0.132676	0.11683	0.05492	0.0653556	0.0111778	0.0460222	0.0763828	0.0452286	0.05815	0.174238	0.0872252	0.104344	0.060979	0.0176382	0.00656094	0.185099	0.0910796	0.12505	0.0919763	0.0575433	0.0708191	0.344444	0.0286884	0.0382933
[truncated: 12 more columns]

## Sheet: Green grass patch density
Green leaf patch density (patches/m2) time series by land unit
ID	1	2	3	5	6	7	8	9	10	11	12	13	14	15	16	17	18	19	20	21	22	23	24	25	26	27	28	29	30	31	32	33	34	35	36	37	38	43	44	45	46	47	48	49	50	51	52	53	54
Community	1	2	3	5	6	7	8	9	10	11	12	13	14	15	16	17	18	19	20	21	22	23	24	25	26	27	28	29	30	31	32	33	34	35	36	37	38	4	9	10	11	15	18	22	23	24	25	28	30
Burnt	0	0	0	0	0	0	0	0	0	0	1	0	0	0	0	0	0	0	0	0	0	0	0	0	0	0	0	0	0	0	0	0	0	0	0	0	0	1	1	1	1	1	1	1	1	1	1	1	1
Clay %	10	4.8	4	8	8	5	15.5	12.7	9.7	8.5	31.3	19	16	12.7	13	18	17.1	10.4	16.2	15.7	16.8	20.4	30.7	26	11.2	16.8	37.2	13.3	31.3	6.7	26	40.3	41.5	22.5	35.1	40	16.5	6.4	12.7	9.7	8.5	12.7	17.1	16.8	20.4	26	37.2	31.3	40.3
2002-03-12	2.50914e-09	0.0189545	4.05774e-21	0.00484599	0.0329485	0.0440341	0.00905808	0.0251474	0.00107258	0.0185691	0.12898	0.00261809	0.0111306	3.79038e-14	0.00460845	0.0311233	0.0246015	5.8438e-13	0.0135094	0.000338921	0.000351467	0.00258252	0.0161406	2.86101e-07	1.55381e-11	0.00941846	1.66152e-19	0.000144277	0.0133536	0.00529347	0.00548914	0.0379555	0.0334118	1.51942e-14	8.75765e-17	3.41491e-18	0.00559893	4.77621e-05	2.53227e-13	0.00114425	8.81369e-13	0.000791295	0.00073764	9.17414e-05	0.00296906	0.762684	0.0294589	1.40915e-19	0.0169851
2002-03-13	2.19367e-09	0.0181461	2.88063e-21	0.00466215	0.0324843	0.0434825	0.00876713	0.0248224	0.00104003	0.0182932	0.119986	0.00261154	0.0103246	2.57948e-14	0.00471276	0.0302027	0.0243007	1.81613e-13	0.0133223	0.000294315	0.000331441	0.00249093	0.0158325	2.4483e-07	1.32814e-11	0.00880723	1.13653e-19	0.000115441	0.0123417	0.00521695	0.00533423	0.0375355	0.0326017	1.49886e-14	5.38633e-17	2.71973e-18	0.00550958	4.30035e-05	2.35425e-13	0.00110345	7.86726e-13	0.000710429	0.000653422	8.82443e-05	0.00285239	0.7572	0.0279845	9.7587e-20	0.0157827
2002-03-14	1.94079e-09	0.0174482	2.12995e-21	0.00450571	0.0320901	0.0430205	0.00851368	0.0245341	0.00101133	0.0180596	0.112115	0.00260788	0.0096418	1.84675e-14	0.00482056	0.0293791	0.0240397	6.26573e-14	0.0131607	0.00025844	0.000314217	0.00241174	0.0155598	2.12514e-07	1.1538e-11	0.00829049	8.00978e-20	9.38697e-05	0.0114669	0.00516341	0.00520129	0.0371634	0.031873	1.51926e-14	3.42786e-17	1.73984e-18	0.0054303	3.91258e-05	1.71761e-13	0.00106758	7.09724e-13	0.000644686	0.000586029	8.5186e-05	0.00275216	0.75207	0.0266834	6.95819e-20	0.0147377
2002-03-15	1.73885e-09	0.0164419	1.64088e-21	0.00436799	0.0317376	0.0425258	0.00829669	0.0242833	0.000986434	0.0178523	0.100595	0.00260526	0.00906951	1.36241e-14	0.00467348	0.0286496	0.023805	2.40876e-14	0.0130153	0.000229613	0.000299579	0.00234119	0.015311	1.86251e-07	1.01978e-11	0.00756002	5.82773e-20	7.78092e-05	0.010363	0.00497184	0.00508143	0.0368191	0.0312009	1.13592e-14	2.26322e-17	1.09831e-18	0.00535786	3.59805e-05	1.22756e-13	0.0010365	6.47643e-13	0.000547055	0.000482654	8.25522e-05	0.00266313	0.744067	0.0247603	5.1184e-20	0.0132371
2002-03-16	1.63971e-09	0.0156539	1.3766e-21	0.00433949	0.0321129	0.0435428	0.00819027	0.0242279	0.000977722	0.0179438	0.0909067	0.00265294	0.00877141	1.26968e-14	0.00491335	0.0281273	0.0237251	1.08506e-14	0.013084	0.000209285	0.000288997	0.00229652	0.0151663	1.7013e-07	9.61334e-12	0.00701029	4.54978e-20	6.72062e-05	0.00944946	0.00536752	0.00502418	0.0366957	0.0307339	1.66125e-14	1.6207e-17	7.27659e-19	0.00530248	3.38675e-05	9.65745e-14	0.00102278	6.38326e-13	0.0004771	0.000409652	8.08008e-05	0.00260558	0.736748	0.02313	3.95112e-20	0.0119914
2002-03-17	1.59197e-09	0.0149802	1.21448e-21	0.00441385	0.0331652	0.0460103	0.00810698	0.0242713	0.000970936	0.018115	0.0823771	0.00271141	0.00861562	1.44311e-14	0.00538439	0.0277397	0.0237164	5.39668e-15	0.0132767	0.000193399	0.000280739	0.00227343	0.0150756	1.62402e-07	9.39587e-12	0.00654504	3.72976e-20	5.92194e-05	0.00865816	0.00634063	0.00499395	0.0367971	0.0304712	3.95614e-14	1.22686e-17	5.00155e-19	0.00526087	3.25094e-05	8.19816e-14	0.00101121	6.34776e-13	0.000421797	0.00035224	7.96927e-05	0.00256551	0.729667	0.021681	3.14296e-20	0.0109048
2002-03-18	1.55366e-09	0.0143939	1.10079e-21	0.00449262	0.0341449	0.0484899	0.0080421	0.0243285	0.000965198	0.0182968	0.0750262	0.00276927	0.00850052	1.63136e-14	0.00589315	0.0274044	0.0237241	2.92139e-15	0.0134733	0.000180301	0.000273837	0.00225537	0.0150033	1.56466e-07	9.2671e-12	0.0061477	3.10935e-20	5.29422e-05	0.0079737	0.00746372	0.00497287	0.0369035	0.0302517	1.01924e-13	9.47717e-18	3.52017e-19	0.00522523	3.13575e-05	7.10583e-14	0.00100113	6.3301e-13	0.000377004	0.000307089	7.87985e-05	0.00253329	0.722959	0.0204054	2.55055e-20	0.00997082
2002-03-19	1.52424e-09	0.0138906	6.33622e-22	0.00456986	0.0350779	0.0508645	0.00775031	0.0240081	0.000960561	0.0184751	0.0687417	0.00282481	0.00814612	1.83934e-14	0.00641022	0.0270283	0.0237385	1.63386e-15	0.0136639	0.000168123	0.000252272	0.00224038	0.0149419	1.51622e-07	8.87241e-12	0.00581209	2.64241e-20	4.73536e-05	0.00738548	0.00868714	0.00495564	0.0370116	0.0300588	2.59614e-13	7.49386e-18	2.5252e-19	0.00519375	3.04049e-05	6.24773e-14	0.000992629	6.32981e-13	0.000340953	0.000271713	7.41452e-05	0.00250602	0.716702	0.0192925	2.1171e-20	0.0091729
2002-03-20	1.50025e-09	0.0134592	3.32008e-22	0.00464411	0.0359362	0.0531626	0.0074448	0.0236238	0.00095656	0.0186461	0.0633585	0.00283089	0.00771187	2.0026e-14	0.00694112	0.0266403	0.0237552	8.73364e-16	0.0138469	0.000154382	0.000230376	0.00222703	0.0148863	1.4741e-07	8.20937e-12	0.00552868	2.27568e-20	4.1217e-05	0.0068787	0.010022	0.00491011	0.0370782	0.0298808	6.45623e-13	6.02386e-18	1.8529e-19	0.00516481	2.95851e-05	5.58716e-14	0.000985106	6.33702e-13	0.000311769	0.000243733	6.84259e-05	0.00248163	0.710894	0.0183203	1.78623e-20	0.00848918
2002-03-21	1.47634e-09	0.0130772	1.80568e-22	0.00470286	0.0366873	0.0533522	0.00716158	0.023252	0.000952362	0.0187804	0.0586626	0.00283344	0.00730656	2.12955e-14	0.00684707	0.0262725	0.0237553	4.90771e-16	0.0139999	0.000142385	0.000211119	0.00221134	0.0148216	1.42711e-07	7.58676e-12	0.00528062	1.97619e-20	3.615e-05	0.00643335	0.0100231	0.00486265	0.0371228	0.0296817	6.72986e-13	4.892e-18	1.37816e-19	0.00513485	2.88436e-05	5.02805e-14	0.000977698	6.32615e-13	0.000287273	0.000220782	6.33603e-05	0.00245497	0.705422	0.0174546	1.52559e-20	0.00789197
2002-03-22	1.45998e-09	0.0127388	1.04425e-22	0.00475661	0.0373691	0.05171	0.00691228	0.0229166	0.000949309	0.0189032	0.0545494	0.00283422	0.00695207	2.236e-14	0.0064241	0.0259438	0.0237556	2.95769e-16	0.0141416	0.000132311	0.000194766	0.00219695	0.0147615	1.38494e-07	7.05835e-12	0.00506334	1.74984e-20	3.21083e-05	0.00604052	0.00904211	0.00481556	0.0371555	0.029494	3.78368e-13	4.07195e-18	1.04208e-19	0.00510712	2.8254e-05	4.56882e-14	0.000971865	6.33565e-13	0.000266598	0.000201791	5.90351e-05	0.00243064	0.700268	0.0166815	1.3317e-20	0.00736798
2002-03-23	1.44867e-09	0.0124403	6.38118e-23	0.00480067	0.0380092	0.0501637	0.00669212	0.0226147	0.000947022	0.019018	0.0509449	0.00283538	0.00664163	2.34542e-14	0.00603831	0.0256529	0.0237452	1.90521e-16	0.0142684	0.000123865	0.000180774	0.00218236	0.0147063	1.34725e-07	6.61036e-12	0.00487377	1.57161e-20	2.8872e-05	0.00569384	0.00818782	0.00477274	0.0371897	0.0293199	2.14898e-13	3.45227e-18	7.98955e-20	0.00508127	2.77683e-05	4.18415e-14	0.00096711	6.35798e-13	0.000249133	0.000186026	5.53164e-05	0.00239869	0.695442	0.0159911	1.18141e-20	0.00690778
2002-03-24	1.43997e-09	0.012177	4.08972e-23	0.00484097	0.0385842	0.0487564	0.00649536	0.0223389	0.000945126	0.0191233	0.047782	0.00283467	0.00636502	2.42923e-14	0.00569692	0.025389	0.0237362	1.29328e-16	0.0143859	0.0001166	0.00016867	0.00216903	0.0146554	1.31344e-07	6.22033e-12	0.00470801	1.42679e-20	2.62027e-05	0.00538738	0.00746553	0.00472942	0.0372108	0.0291566	1.25383e-13	2.96855e-18	6.2339e-20	0.00505747	2.7355e-05	3.86987e-14	0.000963006	6.38299e-13	0.000234322	0.000172869	5.20842e-05	0.00236983	0.690936	0.0153744	1.06154e-20	0.00650291
2002-03-25	1.59908e-09	0.0120242	4.12451e-23	0.0049005	0.0391269	0.0476095	0.00637223	0.0221717	0.000948335	0.0191822	0.0450347	0.00283398	0.00631187	2.51106e-14	0.00542363	0.0251602	0.0237452	1.27729e-16	0.0144264	0.000117806	0.000166607	0.00215354	0.014587	1.34039e-07	5.89728e-12	0.00467502	1.40311e-20	2.72568e-05	0.00513328	0.00687043	0.00510768	0.0373139	0.0292316	1.26316e-13	3.11574e-18	6.11724e-20	0.00502995	2.88686e-05	3.60832e-14	0.000959409	6.4116e-13	0.000221993	0.000162674	5.20044e-05	0.00233106	0.686801	0.0148402	9.63889e-21	0.00615119
2002-03-26	1.76204e-09	0.0118945	4.27125e-23	0.00495796	0.0387437	0.0467211	0.00626549	0.0220216	0.000951359	0.0192497	0.0426103	0.00277777	0.00627239	2.05382e-14	0.00521709	0.0249007	0.0237575	1.17588e-16	0.0144665	0.000117732	0.000164877	0.00213966	0.0145244	1.38166e-07	5.61827e-12	0.00465192	1.41997e-20	2.78139e-05	0.00490982	0.0064204	0.0054327	0.0371898	0.0293057	3.19961e-13	3.46143e-18	6.06938e-20	0.00500443	3.03169e-05	3.38706e-14	0.000955623	6.42681e-13	0.000211643	0.000154232	5.19441e-05	0.00229574	0.68299	0.0143673	8.78441e-21	0.00584252
2002-03-27	1.93503e-09	0.0117826	4.54582e-23	0.00501445	0.0375974	0.0460016	0.0061749	0.0218907	0.000954929	0.0193259	0.0404653	0.00271412	0.00624994	1.41187e-14	0.00505527	0.0246546	0.0237733	1.11309e-16	0.0145075	0.000117573	0.000163573	0.00212712	0.0144669	1.43975e-07	5.3818e-12	0.00463644	1.49562e-20	2.83162e-05	0.00471052	0.00605904	0.00574727	0.0368636	0.0293808	1.62309e-12	4.09395e-18	6.14922e-20	0.00498066	3.17697e-05	3.22066e-14	0.000952423	6.44841e-13	0.000202768	0.000147086	5.19459e-05	0.00226331	0.679455	0.0139428	8.08371e-21	0.00556852
2002-03-28	2.11341e-09	0.0113981	4.91719e-23	0.00507086	0.0365459	0.0453933	0.0060963	0.0217728	0.000959057	0.0194144	0.0380368	0.0026548	0.00623868	9.89905e-15	0.00492481	0.0244311	0.0237943	1.09321e-16	0.0145516	0.000117571	0.000162526	0.0021164	0.0144163	1.51835e-07	5.175e-12	0.00437519	1.62802e-20	2.88559e-05	0.00448247	0.005754	0.00606838	0.0365515	0.0294615	9.36314e-12	5.08713e-18	6.3184e-20	0.00495902	3.32085e-05	3.08819e-14	0.000949866	6.47519e-13	0.000189111	0.000137337	5.19711e-05	0.0022343	0.675197	0.0134215	7.38578e-21	0.00524992
2002-03-29	2.29691e-09	0.011044	5.39373e-23	0.00512382	0.0356058	0.0448915	0.00603074	0.0216711	0.000963403	0.019501	0.0358702	0.00260077	0.00624018	7.13332e-15	0.00482443	0.0242304	0.0238136	1.1051e-16	0.0145912	0.00011769	0.000161797	0.00210627	0.0143674	1.61491e-07	5.00016e-12	0.0041477	1.83887e-20	2.94154e-05	0.00427623	0.00549954	0.00639314	0.0362597	0.0295348	5.07601e-11	6.52482e-18	6.54983e-20	0.00493838	3.46091e-05	2.97872e-14	0.000947653	6.50312e-13	0.000177341	0.000128653	5.20404e-05	0.00220693	0.671174	0.0129481	6.80981e-21	0.004965
2002-03-30	2.43511e-09	0.0107361	6.01378e-23	0.00517744	0.034769	0.0442381	0.00597657	0.0215835	0.000956654	0.0195979	0.0339562	0.00255196	0.00625595	5.28457e-15	0.00467212	0.0240567	0.0238376	1.15876e-16	0.014634	0.000118212	0.000161406	0.00209747	0.0143238	1.738e-07	4.85115e-12	0.00395464	2.09664e-20	3.01276e-05	0.00409186	0.0052751	0.00673325	0.0359931	0.0296136	2.0927e-11	8.2588e-18	6.85382e-20	0.00491934	3.59602e-05	2.88786e-14	0.000935043	6.19613e-13	0.000167312	0.000121304	5.21736e-05	0.00218295	0.667426	0.0125224	6.22825e-21	0.00471213
2002-03-31	2.58263e-09	0.0104722	6.81702e-23	0.00512011	0.0340912	0.0437025	0.00593364	0.0215108	0.000951269	0.0193974	0.0322714	0.00251166	0.00628765	4.11659e-15	0.00454994	0.0239073	0.0237283	1.25169e-16	0.0144568	0.000119114	0.00016139	0.0020731	0.0142075	1.82312e-07	4.72708e-12	0.00379367	2.46006e-20	3.09948e-05	0.0039283	0.00509542	0.00710143	0.0357757	0.0295541	9.89293e-12	1.06569e-17	7.20325e-20	0.00489203	3.7343e-05	2.80533e-14	0.000923898	5.93613e-13	0.000158846	0.000115147	5.23866e-05	0.00214216	0.663972	0.0121427	5.74719e-21	0.00448892
2002-04-01	2.72821e-09	0.0102415	7.81164e-23	0.0049659	0.0334973	0.0432018	0.00590292	0.0214551	0.000946558	0.0191461	0.0307727	0.00247573	0.00633491	3.29001e-15	0.00443766	0.0237764	0.0235789	1.36839e-16	0.0141692	0.000120147	0.00016176	0.00203807	0.0140708	1.88297e-07	4.6302e-12	0.00365527	2.9199e-20	3.19023e-05	0.00378146	0.00493097	0.00747574	0.035579	0.0293641	4.80719e-12	1.37284e-17	7.59944e-20	0.00486136	3.86671e-05	2.73432e-14	0.000913618	5.70331e-13	0.000151573	0.000109886	5.26805e-05	0.00209858	0.660762	0.0118004	5.33222e-21	0.00428987
2002-04-02	2.87443e-09	0.0100405	8.98428e-23	0.00482688	0.0329644	0.04274	0.00588054	0.0214104	0.000942652	0.0189148	0.0294395	0.002443	0.00639214	2.67891e-15	0.00433564	0.0236636	0.0234392	1.51109e-16	0.0139011	0.000121346	0.000162356	0.00200539	0.0139411	1.96316e-07	4.55084e-12	0.00353678	3.49442e-20	3.28712e-05	0.00364972	0.00478228	0.00785443	0.0353975	0.0291798	2.42397e-12	1.76553e-17	8.05949e-20	0.00483226	3.99516e-05	2.6555e-14	0.000904377	5.50062e-13	0.000145324	0.000105389	5.30153e-05	0.0020579	0.657795	0.0114924	4.98034e-21	0.0041123
2002-04-03	3.01985e-09	0.00983135	1.0361e-22	0.0047064	0.0325019	0.0423393	0.00586544	0.0213755	0.000939268	0.0187145	0.0281827	0.00241413	0.00645876	2.23299e-15	0.00424822	0.023445	0.0233149	1.12088e-16	0.0136599	0.000119795	0.000163161	0.00197601	0.0138221	2.06878e-07	4.48622e-12	0.00342282	4.1934e-20	3.24754e-05	0.00352402	0.00465564	0.00824236	0.0352371	0.0290124	1.31667e-12	2.25782e-17	8.58614e-20	0.00480549	4.11923e-05	2.5897e-14	0.000895821	5.31779e-13	0.000138779	0.000100774	5.33895e-05	0.00202105	0.654812	0.0112014	4.67267e-21	0.00394597
2002-04-04	3.16243e-09	0.00961852	1.18869e-22	0.00459949	0.0320751	0.0419443	0.00585409	0.0213447	0.000936259	0.0185347	0.0268425	0.00238714	0.00652782	1.88199e-15	0.00416302	0.0231797	0.0232011	7.07712e-17	0.0134384	0.000116927	0.000163993	0.00194908	0.0137111	2.19548e-07	4.42858e-12	0.0032893	5.02083e-20	3.1497e-05	0.00339692	0.00453283	0.007808	0.0349823	0.0288548	7.11459e-13	2.8615e-17	8.95115e-20	0.00478039	4.23763e-05	2.4803e-14	0.000887863	5.15163e-13	0.000131533	9.57872e-05	5.37537e-05	0.00198707	0.651533	0.0108919	4.40155e-21	0.00376892
2002-04-05	3.17146e-09	0.00942483	1.35552e-22	0.00451413	0.0316989	0.041563	0.00584461	0.0213148	0.000920724	0.0183992	0.0256226	0.00236303	0.00659699	1.61447e-15	0.00408176	0.0229318	0.0231103	4.60744e-17	0.013253	0.000114295	0.000164791	0.00192638	0.0136164	2.3583e-07	4.37368e-12	0.00316971	5.57874e-20	3.06167e-05	0.00327989	0.00441625	0.00743436	0.0347501	0.0287301	3.88255e-13	3.3227e-17	9.37046e-20	0.00475865	4.2914e-05	2.38687e-14	0.000868694	4.66902e-13	0.000125115	9.13774e-05	5.40928e-05	0.00195812	0.648413	0.0106059	4.01554e-21	0.00360731
2002-04-06	3.11506e-09	0.00925359	1.53384e-22	0.00444054	0.0313482	0.0412117	0.00583797	0.0212885	0.000905872	0.0182831	0.0245321	0.00234023	0.00666663	1.39606e-15	0.00400754	0.0227074	0.0230304	3.13262e-17	0.013087	0.00011197	0.000165589	0.00190611	0.0135299	2.54279e-07	4.32492e-12	0.00306548	5.97199e-20	2.9857e-05	0.00317407	0.00431062	0.00709305	0.0345261	0.0286173	2.19309e-13	3.73364e-17	9.78748e-20	0.00473877	4.28821e-05	2.30224e-14	0.000850957	4.23596e-13	0.000119575	8.75788e-05	5.44168e-05	0.00193199	0.645512	0.0103467	3.61922e-21	0.00346234
2002-04-07	3.06425e-09	0.00910325	1.72818e-22	0.00437609	0.0310255	0.0408928	0.00583388	0.0212603	0.000892145	0.0181825	0.0235582	0.00231899	0.00673632	1.21886e-15	0.00394067	0.022504	0.0229585	2.21629e-17	0.0129363	0.000109942	0.000166486	0.00188776	0.0134503	2.74999e-07	4.28458e-12	0.00297538	6.37393e-20	2.92161e-05	0.00307862	0.00421614	0.00678552	0.0343134	0.0285144	1.29227e-13	4.16936e-17	1.02388e-19	0.00472045	4.28556e-05	2.22877e-14	0.000834563	3.86484e-13	0.000114801	8.43152e-05	5.47577e-05	0.00190813	0.642829	0.0101126	3.28202e-21	0.00333243
2002-04-08	3.02441e-09	0.00896918	1.94153e-22	0.00432162	0.0307378	0.0406002	0.0058334	0.0212374	0.000879919	0.0181012	0.0226835	0.0022998	0.00681014	1.07794e-15	0.00387973	0.0223193	0.0228982	1.62477e-17	0.0128035	0.000108179	0.000167463	0.00187152	0.0133792	2.98502e-07	4.25093e-12	0.00289618	6.81145e-20	2.86791e-05	0.00299161	0.00413063	0.00651566	0.0341174	0.0284267	7.89184e-14	4.6537e-17	1.07066e-19	0.00470391	4.28722e-05	2.16282e-14	0.000819804	3.55347e-13	0.000110617	8.14637e-05	5.5111e-05	0.00188789	0.640334	0.00989879	3.00254e-21	0.0032149
2002-04-09	2.99098e-09	0.00884541	2.07693e-22	0.00420724	0.0304629	0.0403345	0.00577865	0.0211561	0.00086882	0.0176888	0.0219019	0.00228128	0.00676189	9.57131e-16	0.00382469	0.0221536	0.0227106	1.23609e-17	0.0126042	0.000106692	0.000167801	0.00184818	0.0132756	2.42815e-07	3.98444e-12	0.00282831	7.26693e-20	2.82499e-05	0.00291245	0.00405397	0.00626289	0.0339256	0.0280421	5.01e-14	5.17627e-17	1.11849e-19	0.00468631	4.29056e-05	2.10289e-14	0.000806325	3.287e-13	0.000106914	7.88426e-05	5.53625e-05	0.00186745	0.638003	0.00970601	2.76426e-21	0.00310943
2002-04-10	2.97014e-09	0.00870144	2.21077e-22	0.00410764	0.0301945	0.0400722	0.00572922	0.0210815	0.000859449	0.017328	0.0211521	0.00226298	0.00671871	8.50877e-16	0.00377064	0.0220028	0.022543	9.6602e-18	0.0124236	0.000105362	0.000168126	0.00182703	0.0131798	2.01323e-07	3.75457e-12	0.00275305	7.76882e-20	2.78732e-05	0.00283412	0.00397922	0.00602044	0.0337326	0.0276824	3.18301e-14	5.76516e-17	1.11985e-19	0.00467002	4.29932e-05	1.87673e-14	0.000794693	3.07023e-13	0.000103089	7.60295e-05	5.5596e-05	0.00184868	0.635595	0.0095156	2.57012e-21	0.00300774
2002-04-11	2.97831e-09	0.00837105	2.35982e-22	0.00412996	0.0306459	0.0416833	0.00570053	0.0210717	0.000854944	0.0170876	0.0198049	0.00225526	0.00672253	8.63877e-16	0.00383225	0.0219061	0.0224314	7.7832e-18	0.012326	0.000104482	0.000168989	0.00184943	0.0131324	1.76968e-07	3.64395e-12	0.00259224	9.38075e-20	2.76264e-05	0.00271525	0.00422715	0.00584379	0.033917	0.0276273	2.31817e-14	6.97199e-17	1.13169e-19	0.00467281	4.31635e-05	1.64686e-14	0.000788384	2.96294e-13	9.12562e-05	6.643e-05	5.58186e-05	0.00185247	0.629532	0.00910332	2.62924e-21	0.00284866
2002-04-12	3.71792e-09	0.00848792	4.98511e-22	0.00485714	0.0358516	0.0566478	0.0067531	0.0221919	0.00102395	0.0196343	0.0208569	0.00246551	0.00722411	1.72432e-12	0.00506047	0.0220598	0.0259758	1.42189e-17	0.012991	0.000108617	0.000184971	0.0024085	0.0152819	2.4641e-07	3.68994e-12	0.00258051	1.85773e-19	2.96031e-05	0.00278501	0.00897216	0.00633106	0.0370119	0.0289941	3.3426e-13	1.36064e-16	1.52803e-19	0.00546214	5.31877e-05	3.75124e-14	0.00105754	5.69964e-13	0.000103808	7.66457e-05	6.20535e-05	0.00264311	0.635032	0.00944753	1.39702e-20	0.00298142
2002-04-13	5.27948e-09	0.00873122	1.65411e-21	0.00607135	0.0441272	0.0849246	0.00832483	0.0237232	0.00127853	0.0237658	0.0222006	0.00297028	0.00826889	7.70076e-09	0.00875392	0.0224928	0.0306488	4.41087e-17	0.0142412	0.000118045	0.000213128	0.00327513	0.0181806	4.51789e-07	4.46916e-12	0.00262802	5.09918e-19	3.40768e-05	0.00288781	0.025859	0.0073512	0.0411712	0.0310488	3.62382e-11	3.68355e-16	2.51172e-19	0.00648299	7.30751e-05	1.06419e-13	0.00146179	1.25258e-12	0.000121083	9.10915e-05	7.32326e-05	0.00394803	0.641473	0.00987818	1.13871e-19	0.00315114
2002-04-14	7.2861e-09	0.00911859	7.10851e-21	0.00820341	0.0583191	0.142176	0.0108264	0.0259248	0.00168093	0.030739	0.0240712	0.00407355	0.0100404	0.000168355	0.0211575	0.0232576	0.037098	1.75485e-16	0.0164076	0.000131963	0.000252887	0.00476591	0.0223627	1.11625e-06	6.55289e-12	0.00272237	1.36163e-18	4.09462e-05	0.00303676	0.102793	0.00891686	0.047079	0.0339889	3.71023e-08	7.08798e-16	4.6327e-19	0.00789481	9.69959e-05	4.32722e-13	0.0021438	3.52418e-12	0.00014843	0.000113363	8.82479e-05	0.00642367	0.649711	0.0104687	1.50104e-18	0.00338957
2002-04-15	1.19472e-08	0.00966797	5.5568e-20	0.011885	0.0814565	0.24755	0.0143884	0.0285985	0.00228242	0.0412258	0.0262498	0.00603297	0.0129478	0.758383	0.0641712	0.024394	0.0454621	1.12804e-15	0.0197279	0.000158241	0.00031852	0.00721418	0.0280358	3.62585e-06	1.11024e-11	0.00292024	8.04143e-18	5.5342e-05	0.0032284	0.389442	0.0117785	0.054828	0.0379295	0.000512137	2.46815e-15	1.12731e-18	0.00974037	0.000152097	2.18022e-12	0.00318172	1.07503e-11	0.000186635	0.000144736	0.00011829	0.0107194	0.6585	0.0111598	2.17562e-17	0.00367022
2002-04-16	2.17105e-08	0.0103537	4.43751e-19	0.0175957	0.11516	0.401698	0.019226	0.0315631	0.00311643	0.0554874	0.0286314	0.00915742	0.0169629	0.999988	0.165649	0.0256396	0.0555848	7.45342e-15	0.0238549	0.000194455	0.000412389	0.0110012	0.0352123	1.30022e-05	1.86169e-11	0.00316645	7.26973e-17	7.78371e-05	0.0034428	0.792062	0.0161394	0.0640974	0.0427267	0.514753	1.23024e-14	3.01538e-18	0.0120248	0.000237966	1.14057e-11	0.0046829	3.2709e-11	0.000235253	0.00018466	0.000160263	0.0177848	0.667207	0.0119086	3.0733e-16	0.00397793
2002-04-17	3.9416e-08	0.0110855	3.47865e-18	0.0258137	0.159421	0.504895	0.0257143	0.0347924	0.00426453	0.0740826	0.0312432	0.0140821	0.0221517	1	0.264943	0.0269369	0.0676585	4.85278e-14	0.0287619	0.000238717	0.000533423	0.0167861	0.0441741	4.91485e-05	3.11784e-11	0.0034372	7.97889e-16	0.000109211	0.00367431	0.921387	0.0220757	0.074718	0.0480824	0.877923	8.5354e-14	8.1216e-18	0.0148476	0.000371707	5.943e-11	0.00684523	9.963e-11	0.000295901	0.000235138	0.000216816	0.0292482	0.675789	0.012711	4.21847e-15	0.00431477
2002-04-18	7.05531e-08	0.0116886	2.5545e-17	0.0371766	0.213982	0.573331	0.0341587	0.0382323	0.00580519	0.0970805	0.0335071	0.0213011	0.0286655	1	0.338378	0.0282569	0.0816029	2.97304e-13	0.0344458	0.000291432	0.00068615	0.0253424	0.0550768	0.000189238	5.15982e-11	0.00369243	8.94481e-15	0.000151707	0.00386338	0.961173	0.029939	0.0866403	0.0539563	0.92025	7.34546e-13	2.17398e-17	0.0182641	0.000573076	2.9823e-10	0.0098617	2.97464e-10	0.000356017	0.000285989	0.000291171	0.0470616	0.682794	0.0133949	5.35282e-14	0.00460431
2002-04-19	1.22641e-07	0.0122496	1.69147e-16	0.0522123	0.276811	0.595566	0.0447494	0.0418092	0.00780966	0.123901	0.0357965	0.0307579	0.0365479	1	0.360494	0.0295712	0.097201	1.65181e-12	0.0408675	0.000352501	0.000874111	0.0374572	0.0679678	0.000719242	8.34608e-11	0.00393301	9.34195e-14	0.00020737	0.00404892	0.970188	0.0400525	0.0997645	0.0602995	0.954548	6.64952e-12	4.12135e-17	0.0223099	0.000862132	1.39759e-09	0.0139187	8.54519e-10	0.000421956	0.000341998	0.000386231	0.0732217	0.689298	0.0140773	6.05049e-13	0.00489666
2002-04-20	2.07585e-07	0.0128089	1.0264e-15	0.0715831	0.345695	0.583897	0.057783	0.045544	0.0103852	0.153896	0.0381581	0.0419748	0.0459858	1	0.337737	0.0308775	0.114415	8.36961e-12	0.0480614	0.000422624	0.00110477	0.0539664	0.0829573	0.0026495	1.32895e-10	0.00417787	8.99006e-13	0.000279178	0.00423784	0.966337	0.0528875	0.114121	0.0671208	0.934331	5.91229e-11	7.83826e-17	0.0270633	0.00126825	6.17074e-09	0.0192771	2.37102e-09	0.000496009	0.000405476	0.000506946	0.109685	0.695484	0.0147704	6.15469e-12	0.00519831
2002-04-21	3.50346e-07	0.0134017	6.06099e-15	0.0968119	0.414269	0.549434	0.0739249	0.0495516	0.0137704	0.187257	0.0407028	0.0545045	0.0573729	1	0.30833	0.0322211	0.133773	4.13911e-11	0.0563208	0.000505645	0.00139412	0.0760991	0.100521	0.0092859	2.11401e-10	0.00444183	8.43887e-12	0.000374393	0.00443977	0.952699	0.0689003	0.128867	0.0746097	0.911355	5.293e-10	1.52878e-16	0.0327492	0.00185709	2.68714e-08	0.0264797	6.56942e-09	0.000583188	0.000480936	0.000663275	0.158907	0.701622	0.0155055	6.02247e-11	0.00552351
2002-04-22	5.76454e-07	0.0139953	3.2434e-14	0.127507	0.445449	0.508942	0.0926646	0.0536663	0.0180021	0.221742	0.0433362	0.0581683	0.0703327	1	0.273992	0.0335461	0.15446	1.87544e-10	0.0653982	0.000599766	0.00174239	0.103388	0.120118	0.0267721	3.28966e-10	0.0047114	7.18439e-11	0.000494714	0.00464668	0.930397	0.0796423	0.133709	0.082586	0.895435	4.45067e-09	3.0142e-16	0.0392877	0.00266034	1.09402e-07	0.0356569	1.74851e-08	0.000680577	0.000565973	0.000857173	0.218932	0.707474	0.0162542	5.28726e-10	0.00586049
2002-04-23	9.23332e-07	0.0145842	1.57303e-13	0.163438	0.459235	0.466686	0.113639	0.0578601	0.0231707	0.256206	0.0460427	0.0590793	0.0847048	1	0.238587	0.034849	0.17613	7.76831e-10	0.0752324	0.000705158	0.00215626	0.135095	0.141426	0.0577679	5.00817e-10	0.00498437	5.52159e-10	0.00064394	0.00485734	0.897215	0.0853508	0.135873	0.0910121	0.875536	3.48564e-08	6.08518e-16	0.0466822	0.00372516	4.15346e-07	0.0470444	4.45289e-08	0.000787934	0.000660486	0.00109396	0.286509	0.713028	0.017012	4.15757e-09	0.00620748
2002-04-24	1.44631e-06	0.0151746	3.89515e-13	0.204332	0.450155	0.427276	0.135559	0.06189	0.0293969	0.290088	0.0488434	0.0554755	0.0960424	1	0.206258	0.0360229	0.198594	2.91861e-09	0.0858356	0.000811362	0.00249345	0.17032	0.164181	0.101699	7.47061e-10	0.00526313	3.87925e-09	0.000808653	0.00507371	0.853899	0.0872877	0.134178	0.0999032	0.825005	2.56349e-07	1.27156e-15	0.0549684	0.00511686	1.48028e-06	0.060939	1.09051e-07	0.000906596	0.000765755	0.00130291	0.357964	0.718345	0.0177844	2.9715e-08	0.00656742
2002-04-25	2.21827e-06	0.0157653	9.55108e-13	0.249555	0.421878	0.390834	0.158755	0.0659913	0.0367755	0.322997	0.0517362	0.0498946	0.108362	1	0.177296	0.0371813	0.221656	1.02516e-08	0.0972057	0.000928207	0.00287406	0.208027	0.188054	0.162139	1.09537e-09	0.00554724	2.50985e-08	0.00100556	0.00529557	0.800059	0.0817024	0.129836	0.109272	0.738007	1.7771e-06	2.7894e-15	0.0641528	0.00690323	4.98358e-06	0.07758	2.5742e-07	0.00103708	0.00088238	0.00154263	0.429532	0.723439	0.0185707	1.94747e-07	0.00694017
2002-04-26	3.34663e-06	0.0163586	2.30362e-12	0.292312	0.385355	0.353079	0.182667	0.0701576	0.0453958	0.353712	0.0547307	0.0444015	0.12161	1	0.148662	0.0383256	0.244814	3.38968e-08	0.108771	0.00105624	0.00330086	0.243651	0.21222	0.232674	1.58068e-09	0.00583759	1.50865e-07	0.00123922	0.0055238	0.727272	0.0734825	0.12469	0.118006	0.611212	1.16834e-05	6.50167e-15	0.073952	0.00917591	1.59578e-05	0.0971867	5.87717e-07	0.00118048	0.00101145	0.0018157	0.496251	0.728335	0.0193735	1.18201e-06	0.00732718
2002-04-27	4.94166e-06	0.0169428	5.37727e-12	0.302057	0.348512	0.318968	0.206454	0.0743277	0.0551669	0.354739	0.0577832	0.0390233	0.135559	1	0.124268	0.0394439	0.236124	1.04562e-07	0.114095	0.00119445	0.00377072	0.238972	0.209527	0.235351	2.23704e-09	0.00612862	8.31603e-07	0.00151114	0.00575493	0.644985	0.065618	0.119425	0.120969	0.417233	7.16591e-05	1.58727e-14	0.0715684	0.0119754	4.81084e-05	0.119565	1.28726e-06	0.00133471	0.00115117	0.00212089	0.485274	0.732985	0.020181	6.56241e-06	0.00772311
2002-04-28	7.18484e-06	0.017531	1.24149e-11	0.297696	0.314382	0.289969	0.229941	0.0785533	0.066165	0.347633	0.0609472	0.0341869	0.150416	1	0.104853	0.040547	0.224674	3.06164e-07	0.115265	0.0013444	0.00429602	0.228002	0.203256	0.22487	3.1248e-09	0.0064266	4.29177e-06	0.00182808	0.00599348	0.56296	0.058647	0.114416	0.121671	0.204222	0.000410601	4.02834e-14	0.0680585	0.0154141	0.000138604	0.144891	2.73337e-06	0.00150309	0.00130468	0.00246636	0.463719	0.737475	0.0210069	3.40559e-05	0.00813507
2002-04-29	1.02511e-05	0.0181104	2.75313e-11	0.274984	0.283863	0.264021	0.252454	0.0827556	0.0781882	0.328314	0.0641702	0.0299847	0.165742	1	0.0886454	0.0416216	0.208958	8.42932e-07	0.110912	0.00150437	0.00486604	0.207157	0.191651	0.192993	4.28722e-09	0.00672506	2.05069e-05	0.00218995	0.00623527	0.481858	0.0526059	0.109752	0.119661	0.0674607	0.00202626	1.03878e-13	0.0628133	0.0195194	0.000377968	0.172694	5.58843e-06	0.00168289	0.00146953	0.00284638	0.422167	0.741749	0.0218378	0.000163391	0.00855655
2002-04-30	1.43969e-05	0.0186838	5.88496e-11	0.23878	0.25667	0.240862	0.273833	0.0869349	0.091136	0.301866	0.0674633	0.0263549	0.181472	1	0.0751923	0.0424945	0.191428	2.08083e-06	0.102201	0.0016529	0.00548253	0.181899	0.177278	0.152243	5.78847e-09	0.00702525	9.13886e-05	0.00254548	0.00648136	0.40569	0.0473524	0.1054	0.115413	0.017751	0.00742577	2.68574e-13	0.0570689	0.0243696	0.000978553	0.202719	1.10436e-05	0.00187488	0.00164652	0.00326242	0.373782	0.74584	0.0226766	0.000730404	0.00898922
2002-05-01	1.95779e-05	0.0192436	1.20315e-10	0.199915	0.230054	0.218756	0.293625	0.0910125	0.104229	0.273565	0.0707997	0.0229307	0.197319	1	0.0632934	0.0432114	0.17426	4.60425e-06	0.0930546	0.00179906	0.0061378	0.156892	0.162707	0.11425	7.66137e-09	0.00732302	0.000370626	0.0029177	0.00673024	0.332413	0.042324	0.100928	0.110065	0.00393972	0.0198803	6.82046e-13	0.0516083	0.0297828	0.00236081	0.23306	2.07141e-05	0.00207598	0.00183278	0.00370931	0.324885	0.749715	0.0235153	0.00296871	0.00942999
2002-05-02	2.08832e-05	0.0198104	2.44135e-10	0.166114	0.207445	0.200671	0.312503	0.0951362	0.0943238	0.246116	0.0742649	0.020133	0.21379	1	0.0542786	0.0439256	0.158323	9.93243e-06	0.0846547	0.00195448	0.00686036	0.133964	0.148883	0.0829244	1.00608e-08	0.00762893	0.000140228	0.00333318	0.00698836	0.27416	0.0381186	0.0969104	0.104903	0.00100085	0.0141976	1.72426e-12	0.0466302	0.0291693	0.00542916	0.210288	1.07124e-05	0.00229352	0.00203526	0.00420642	0.278347	0.753496	0.0243766	0.00117845	0.0098902
2002-05-03	1.93893e-05	0.0203732	4.83316e-10	0.137883	0.188078	0.184407	0.330189	0.0992345	0.083009	0.220459	0.0778117	0.0178235	0.230513	1	0.0467379	0.0446304	0.143961	2.07146e-05	0.0771374	0.00211763	0.00764013	0.113734	0.136127	0.058119	1.30552e-08	0.00793735	4.44246e-05	0.00379012	0.00725217	0.224591	0.0345438	0.0932518	0.10002	0.000263256	0.00825798	4.28546e-12	0.0422027	0.0256296	0.0115476	0.183923	5.41367e-06	0.00252427	0.002251	0.00474762	0.23608	0.757137	0.0252484	0.000387612	0.010364
2002-05-04	1.57905e-05	0.0209272	9.33701e-10	0.115136	0.171236	0.170345	0.346703	0.103296	0.0694094	0.19744	0.0814124	0.0158866	0.24738	1	0.0406533	0.0453204	0.13147	4.17181e-05	0.0705886	0.00228748	0.00847826	0.0965707	0.124712	0.0393034	1.67454e-08	0.0082453	1.01621e-05	0.00428758	0.00751947	0.184803	0.0314486	0.0898707	0.0955165	7.58121e-05	0.00309846	1.04375e-11	0.0383677	0.0211834	0.0221628	0.151694	2.44319e-06	0.00276662	0.00247854	0.00533398	0.1995	0.760619	0.0261243	8.65664e-05	0.0108478
2002-05-05	1.0843e-05	0.0214692	1.75654e-09	0.096744	0.156508	0.158049	0.362116	0.107312	0.0566416	0.17685	0.0850445	0.0142512	0.264256	1	0.0356672	0.0460128	0.120451	8.18828e-05	0.0648467	0.00246682	0.00937285	0.0820803	0.114482	0.0255589	2.12411e-08	0.00855103	2.16233e-06	0.00483569	0.00778845	0.152869	0.0287479	0.0867301	0.0913455	2.35545e-05	0.000882647	2.49104e-11	0.0350251	0.0149757	0.0375779	0.122289	1.06614e-06	0.00301941	0.00271683	0.00596473	0.168229	0.763944	0.0270001	1.81376e-05	0.0113389
2002-05-06	6.79979e-06	0.0220121	3.2767e-09	0.0811679	0.143742	0.148622	0.37672	0.111347	0.0460654	0.157751	0.088776	0.0128807	0.281394	0.999998	0.0320544	0.0467102	0.110345	0.00015782	0.0595767	0.00265716	0.0103472	0.0694224	0.104951	0.0158142	2.67709e-08	0.00886131	4.68205e-07	0.00544218	0.00806472	0.130413	0.0264113	0.0838483	0.0873336	9.04271e-06	0.000233162	5.85612e-11	0.0319823	0.010614	0.056078	0.0982094	4.73735e-07	0.00328775	0.00297078	0.00665612	0.140729	0.767173	0.0278916	3.86995e-06	0.0118466
2002-05-07	4.25696e-06	0.0225359	5.92653e-09	0.0686277	0.132576	0.139281	0.390236	0.11529	0.0372799	0.140979	0.0924071	0.011716	0.298248	0.999887	0.0286567	0.0473866	0.101494	0.000293273	0.0549475	0.00285254	0.0113738	0.058921	0.0964478	0.00962106	3.33297e-08	0.00916761	1.00314e-07	0.00608979	0.00834137	0.110011	0.0243589	0.0811667	0.0836119	3.29931e-06	5.93326e-05	3.75977e-11	0.0293243	0.00750113	0.034119	0.0783425	2.11357e-07	0.00356241	0.00323249	0.00738942	0.11787	0.770204	0.0287808	8.1539e-07	0.012357
2002-05-08	2.69621e-06	0.0230421	1.03471e-08	0.0585021	0.122402	0.130458	0.40266	0.11911	0.030245	0.126359	0.0960375	0.0106834	0.314622	0.999023	0.0256127	0.04804	0.0937417	0.000524816	0.0508733	0.00305164	0.012441	0.0502376	0.0888668	0.00584433	4.09532e-08	0.00946762	2.21726e-08	0.00677435	0.00861812	0.0924944	0.0224809	0.0785728	0.0801547	1.19378e-06	1.53243e-05	2.15787e-11	0.0269963	0.0053457	0.015389	0.0625602	9.69344e-08	0.00384266	0.00350034	0.00815652	0.0990166	0.773081	0.0296619	1.76908e-07	0.0128711
2002-05-09	1.7584e-06	0.0235088	1.78322e-08	0.0503756	0.113701	0.122917	0.414444	0.122915	0.0248285	0.113796	0.0996774	0.00982295	0.330924	0.992109	0.0231404	0.0486415	0.0869989	0.000584573	0.047327	0.0030178	0.0135822	0.0431625	0.0822128	0.00361184	5.00066e-08	0.00969234	5.36282e-09	0.00652313	0.00889558	0.0788921	0.0208697	0.076226	0.0769991	4.73918e-07	4.25631e-06	1.04225e-11	0.0249817	0.00389477	0.00502571	0.0505159	4.70685e-08	0.00412738	0.00376692	0.00898108	0.0837334	0.775753	0.0305357	4.19584e-08	0.0133895
2002-05-10	1.17458e-06	0.0239699	3.02509e-08	0.0437323	0.10609	0.116237	0.425535	0.126677	0.0205879	0.102892	0.103364	0.00908687	0.347019	0.946813	0.0210492	0.0492369	0.0810773	0.000662887	0.0441931	0.00299702	0.014794	0.0373213	0.0762957	0.00227058	6.06167e-08	0.00991831	1.39581e-09	0.00633725	0.00917685	0.0678966	0.0194537	0.0740582	0.0740805	1.99019e-07	1.25415e-06	4.64621e-12	0.023211	0.0028906	0.00142307	0.0411847	2.39565e-08	0.00442204	0.00404354	0.00986089	0.0712069	0.778336	0.0314137	1.06971e-08	0.0139183
2002-05-11	7.86981e-07	0.0244222	5.02999e-08	0.0382204	0.0997031	0.109882	0.435509	0.130043	0.0170909	0.0933651	0.107075	0.00847961	0.361404	0.756397	0.019147	0.0498198	0.0757958	0.000756824	0.0413915	0.00298389	0.0160416	0.0324417	0.0709833	0.00145029	7.07481e-08	0.010143	3.65914e-10	0.00619155	0.0094605	0.058348	0.0182549	0.0721335	0.071356	8.31294e-08	3.70577e-07	2.06029e-12	0.021636	0.00215081	0.000395794	0.0335658	1.23306e-08	0.00472478	0.00432834	0.0107905	0.0608395	0.780823	0.0322917	2.7408e-09	0.0144549
2002-05-12	5.39392e-07	0.0248622	3.31813e-08	0.0336723	0.0937085	0.104245	0.421169	0.126736	0.0143396	0.0851216	0.110788	0.00791954	0.362902	0.353366	0.0175283	0.0503835	0.0711533	0.000864571	0.0389051	0.00297577	0.0157299	0.0283942	0.0662493	0.000945746	7.82298e-08	0.0103649	1.0283e-10	0.00607442	0.00974487	0.0506081	0.0171249	0.0702376	0.0688285	3.65663e-08	1.15723e-07	9.09563e-13	0.0202438	0.0016295	0.000110516	0.0276394	6.63021e-09	0.00503236	0.00461829	0.0105762	0.052323	0.7832	0.0331639	7.51972e-10	0.014996
2002-05-13	3.78925e-07	0.025291	1.31092e-08	0.0298278	0.0883271	0.0994859	0.402079	0.121839	0.0121727	0.0778407	0.114505	0.00742444	0.353457	0.094801	0.0162118	0.0509357	0.0669338	0.000996404	0.0366554	0.00297586	0.0145406	0.0249677	0.0619595	0.00062582	7.09214e-08	0.0105837	3.12131e-11	0.00599489	0.0100301	0.0445975	0.0161046	0.0684496	0.0664491	1.75768e-08	3.84856e-08	4.08668e-13	0.0189897	0.0012588	3.2308e-05	0.0230284	3.73235e-09	0.00534532	0.00491378	0.00972193	0.0451971	0.785479	0.0340317	2.22665e-10	0.0155421
2002-05-14	2.71477e-07	0.0257067	4.14365e-09	0.0266125	0.0834741	0.0948356	0.375153	0.1147	0.010434	0.0715196	0.118209	0.00698381	0.331861	0.0212116	0.0149708	0.0514669	0.063207	0.00114045	0.0346454	0.00297664	0.0130286	0.0220989	0.0581206	0.000422537	5.2326e-08	0.0107981	1.00727e-11	0.00592449	0.0103152	0.039176	0.0151783	0.0667567	0.064236	8.27972e-09	1.34459e-08	1.89319e-13	0.0178732	0.000987756	1.01306e-05	0.01937	2.17945e-09	0.00566152	0.0052128	0.00872982	0.0393	0.787657	0.0348916	7.00298e-11	0.016091
2002-05-15	1.97849e-07	0.0259978	7.10844e-10	0.0238887	0.0790687	0.090454	0.343862	0.106277	0.00901916	0.065976	0.121832	0.00658849	0.298014	0.00476883	0.0138425	0.0519767	0.0598594	0.00129454	0.0328328	0.00297721	0.0107866	0.0196702	0.0546576	0.000290216	3.10385e-08	0.0109289	3.42903e-12	0.0058593	0.0105805	0.0344659	0.0143322	0.0651459	0.0621634	3.92331e-09	4.9035e-09	9.01287e-14	0.0168699	0.000785733	3.37899e-06	0.0164302	1.31362e-09	0.00592206	0.00546502	0.00697349	0.0343684	0.789561	0.0357088	2.32112e-11	0.0166259
2002-05-16	1.4642e-07	0.0262085	1.16175e-10	0.0216564	0.0749578	0.0864352	0.311507	0.0980268	0.00785687	0.0612852	0.125437	0.006224	0.262305	0.00108586	0.0128426	0.0524753	0.0569822	0.00147747	0.0312554	0.00298372	0.00864844	0.0176781	0.0516403	0.000205332	1.81682e-08	0.0110312	1.22554e-12	0.00581989	0.0108274	0.0304763	0.0135397	0.0635776	0.0602887	1.90859e-09	1.86007e-09	4.30319e-14	0.0159988	0.000632729	1.14401e-06	0.0140437	8.14389e-10	0.0061441	0.00569545	0.00548006	0.0303728	0.79134	0.0364952	8.06925e-12	0.0171564
2002-05-17	1.10492e-07	0.0264162	1.94367e-11	0.0196863	0.0713408	0.0829175	0.278669	0.0904277	0.00690945	0.0570294	0.129035	0.00590608	0.228393	0.000275217	0.0119945	0.052963	0.0542933	0.00169269	0.0297878	0.00299512	0.00694608	0.0159281	0.0488396	0.000146387	1.07236e-08	0.0111335	4.66335e-13	0.00580145	0.0110746	0.0272365	0.0128376	0.0621332	0.0584907	9.84114e-10	7.43515e-10	2.12439e-14	0.0151913	0.000517352	4.1425e-07	0.0121237	5.22416e-10	0.00636678	0.00592737	0.00431017	0.0269052	0.793054	0.0372766	2.98535e-12	0.0176902
2002-05-18	8.4306e-08	0.0266201	3.46701e-12	0.0179676	0.0681366	0.0795962	0.246623	0.0835809	0.00611142	0.0532219	0.132597	0.00562603	0.197341	7.67755e-05	0.0112168	0.0534309	0.0518357	0.00193078	0.0284374	0.00300801	0.00561387	0.0144053	0.0462651	0.0001055	6.45664e-09	0.0112359	1.83695e-13	0.00579227	0.0113204	0.0243871	0.0122095	0.0607918	0.0567798	5.10682e-10	3.05218e-10	1.08131e-14	0.0144503	0.000426854	1.59732e-07	0.0105253	3.41959e-10	0.00658811	0.00615838	0.00341014	0.0239254	0.794697	0.0380471	1.1421e-12	0.0182234
2002-05-19	6.53356e-08	0.0268205	6.83816e-13	0.0164736	0.0651101	0.0765714	0.216566	0.0775402	0.00544751	0.0498277	0.136132	0.00536349	0.169932	2.17363e-05	0.010528	0.0538838	0.0495895	0.00220096	0.0272026	0.00302379	0.00458574	0.0130855	0.0439145	7.70381e-05	4.00711e-09	0.011338	7.60852e-14	0.00579622	0.0115652	0.0219647	0.0116138	0.059475	0.0551649	2.73147e-10	1.3059e-10	5.65882e-15	0.0137744	0.000356534	6.50395e-08	0.00921143	2.29933e-10	0.0068085	0.00638893	0.00272755	0.0213749	0.796274	0.0388085	4.59223e-13	0.018757
2002-05-20	5.13396e-08	0.0270284	1.47601e-13	0.015169	0.0623182	0.0738457	0.188914	0.0721838	0.00488928	0.0467978	0.13968	0.00512284	0.146	6.43437e-06	0.00992327	0.0543219	0.0475668	0.00250058	0.0260714	0.00304072	0.00378263	0.0119374	0.0417661	5.6978e-05	2.5555e-09	0.0114474	3.29658e-14	0.00580697	0.0118134	0.0199186	0.0110616	0.0582116	0.0536407	1.51525e-10	5.80028e-11	3.03969e-15	0.0131569	0.000301056	2.78132e-08	0.00811956	1.58311e-10	0.00703455	0.00662471	0.00220357	0.0191839	0.797816	0.0395701	1.93041e-13	0.0192974
2002-05-21	4.11254e-08	0.0272357	3.26012e-14	0.0139942	0.0597434	0.071305	0.162954	0.0672316	0.00442836	0.0440101	0.143211	0.00490205	0.124594	1.99192e-06	0.00937327	0.0547477	0.0456321	0.0028456	0.0250055	0.0030615	0.00312712	0.0109089	0.0397481	4.23415e-05	1.64254e-09	0.0115588	1.52137e-14	0.00583323	0.0120619	0.0181256	0.0105495	0.0570005	0.0521651	8.54444e-11	2.71957e-11	1.66919e-15	0.0125768	0.000257991	1.23961e-08	0.00722978	1.12507e-10	0.00726155	0.00686143	0.00178339	0.0172458	0.799307	0.0403252	8.64683e-14	0.0198398
2002-05-22	3.31549e-08	0.0274414	7.90605e-15	0.0129804	0.0574328	0.0689432	0.140149	0.0628555	0.00402514	0.0415576	0.146725	0.00470461	0.106461	6.6495e-07	0.00887397	0.0551616	0.0439297	0.00323633	0.0240435	0.00308467	0.00261214	0.0100242	0.03793	3.19969e-05	1.08559e-09	0.0116709	7.16957e-15	0.00586972	0.0123106	0.0165548	0.010087	0.0558698	0.0507933	4.90778e-11	1.29566e-11	9.43972e-16	0.0120541	0.000222257	5.81466e-09	0.00645876	8.08698e-11	0.00748896	0.00709867	0.00145912	0.0155991	0.80075	0.0410741	3.95057e-14	0.0203844
2002-05-23	2.70379e-08	0.0276499	2.11206e-15	0.0121174	0.0553448	0.0669238	0.120571	0.0590027	0.00367852	0.0394314	0.150248	0.00452683	0.0912953	2.37167e-07	0.00845599	0.055567	0.0423971	0.00368234	0.0231892	0.0031104	0.00220605	0.00927315	0.0363182	2.4686e-05	7.38396e-10	0.0117866	3.51108e-15	0.00591646	0.012562	0.0152832	0.00966698	0.0548123	0.0495401	2.99808e-11	6.37924e-12	5.46187e-16	0.0115905	0.000193175	2.83272e-09	0.00580481	5.92419e-11	0.00772026	0.00733969	0.00120785	0.0142177	0.80216	0.0418235	1.87512e-14	0.0209354
2002-05-24	2.22511e-08	0.0276849	6.08518e-16	0.011326	0.053419	0.0650254	0.103765	0.0555598	0.00337723	0.0374487	0.153713	0.00436312	0.0785064	8.83452e-08	0.00807033	0.0559553	0.0409494	0.00416893	0.0223751	0.00313653	0.00187877	0.00858745	0.0347869	1.90937e-05	5.1362e-10	0.0115254	1.77151e-15	0.0059668	0.0127815	0.0141466	0.00927684	0.0537994	0.0483163	1.85312e-11	3.21698e-12	3.23426e-16	0.0111497	0.00016912	1.43681e-09	0.00524217	4.40608e-11	0.00794681	0.00754395	0.00100878	0.0129711	0.803503	0.042541	9.1637e-15	0.0214801
2002-05-25	1.84731e-08	0.0277287	1.8776e-16	0.0106132	0.051655	0.0632448	0.0894453	0.0524679	0.00311372	0.0356294	0.157139	0.00421335	0.0677323	3.4585e-08	0.00771518	0.0563315	0.0396152	0.00471536	0.0216135	0.003165	0.00161241	0.00797249	0.0333581	1.48743e-05	3.64583e-10	0.0112985	9.20318e-16	0.00602665	0.0130009	0.0131312	0.00891708	0.052838	0.0471426	1.16084e-11	1.66164e-12	1.95744e-16	0.010738	0.000149086	7.55675e-10	0.00475597	3.3247e-11	0.00817143	0.00774819	0.000849476	0.0118661	0.804798	0.043249	4.60857e-15	0.0220238
2002-05-26	1.54028e-08	0.0277752	6.14216e-17	0.00997014	0.0500078	0.061575	0.077263	0.0496703	0.00287735	0.0339657	0.160507	0.00407361	0.0586206	1.39681e-08	0.00738786	0.0565897	0.0383529	0.00530903	0.0209008	0.00318816	0.00139292	0.00741963	0.0320244	1.16697e-05	2.63306e-10	0.0110952	4.8497e-16	0.0060758	0.0132179	0.0122228	0.00857906	0.0519091	0.0460169	7.36891e-12	8.66617e-13	1.221e-16	0.0103533	0.000131916	4.17293e-10	0.00432456	2.52758e-11	0.00839148	0.00794937	0.000720342	0.0108845	0.806038	0.0439431	2.34815e-15	0.0225629
2002-05-27	1.29772e-08	0.0278246	2.1555e-17	0.0093995	0.0484633	0.0599889	0.0670704	0.0471651	0.0026723	0.0324661	0.16382	0.00394269	0.0510063	5.79891e-09	0.0070821	0.0561653	0.0372063	0.00242062	0.0202451	0.00304661	0.00121298	0.00693026	0.0307993	9.25573e-06	1.94109e-10	0.0109133	2.64681e-16	0.00560983	0.0134332	0.0113983	0.00826041	0.0510093	0.0449543	4.71394e-12	4.65684e-13	7.69661e-17	0.00999959	0.000117659	2.34504e-10	0.00395406	1.95386e-11	0.00860735	0.00814769	0.000616183	0.0100252	0.80723	0.0446243	1.2389e-15	0.0230981
2002-05-28	1.43388e-08	0.0287112	3.25436e-17	0.0104289	0.0536048	0.0811931	0.058901	0.0457749	0.002521	0.0318953	0.167286	0.00387511	0.0472387	5.34754e-09	0.00776759	0.0554823	0.0366464	0.00257258	0.0201522	0.00300348	0.00125986	0.00688469	0.0301823	9.04264e-06	1.49866e-10	0.0110275	1.66218e-16	0.00549801	0.0138985	0.0235832	0.00981871	0.0523229	0.0464821	6.75041e-11	3.06006e-13	6.96467e-17	0.00977277	0.000137621	1.59765e-10	0.00366275	1.60123e-11	0.00902755	0.00856828	0.000625131	0.00942302	0.808624	0.0455773	6.93175e-16	0.0237129
2002-05-29	1.58847e-08	0.0296014	5.03064e-17	0.0115614	0.0591347	0.108323	0.0520775	0.0445343	0.00238471	0.0314332	0.170704	0.00381539	0.0439996	5.2216e-09	0.00859037	0.0540784	0.0361688	0.00217723	0.0200802	0.00287879	0.00131104	0.00688882	0.0296561	9.29098e-06	1.17709e-10	0.0111457	1.10978e-16	0.00516299	0.0143709	0.0527475	0.011632	0.0536939	0.048069	3.71747e-09	2.16942e-13	7.07923e-17	0.00957104	0.000160974	1.12847e-10	0.00340181	1.32317e-11	0.00945303	0.00900214	0.000636052	0.00891076	0.809966	0.0465271	3.95645e-16	0.0243295
2002-05-30	1.76205e-08	0.0304849	7.77124e-17	0.0127851	0.0649654	0.141644	0.0463212	0.0434073	0.00226247	0.0310571	0.174074	0.00376027	0.0411606	5.26453e-09	0.00954374	0.0519698	0.0357592	0.00111458	0.0200204	0.00256342	0.00136415	0.00693458	0.0292039	1.00284e-05	9.37667e-11	0.0112633	8.15663e-17	0.00429117	0.014847	0.113839	0.0137096	0.0550936	0.0496949	3.02014e-07	1.74635e-13	7.8035e-17	0.00938947	0.000187842	8.21778e-11	0.0031691	1.10347e-11	0.00987919	0.00944505	0.00064768	0.00847111	0.811258	0.0474676	2.31509e-16	0.0249444
2002-05-31	1.95629e-08	0.0313663	1.21772e-16	0.0140928	0.071082	0.181173	0.0415664	0.0424234	0.00215285	0.0307455	0.177408	0.00370982	0.0387608	5.4758e-09	0.0106445	0.0498386	0.0354043	0.000544633	0.0199662	0.00222302	0.00142245	0.00701625	0.0288102	1.13377e-05	7.61189e-11	0.0113885	6.91236e-17	0.00343172	0.0153281	0.211803	0.016076	0.0565226	0.051347	2.38254e-05	1.70198e-13	8.99054e-17	0.00922349	0.00021847	6.11604e-11	0.00296159	9.28788e-12	0.010307	0.0098989	0.00066172	0.00809087	0.812507	0.0483999	1.39688e-16	0.0255593
2002-06-01	2.16206e-08	0.03222	1.8e-16	0.01542	0.0772023	0.224883	0.0373939	0.0414648	0.002054	0.0304495	0.180643	0.00365871	0.0364889	5.59193e-09	0.0118351	0.0478014	0.0350611	0.000252622	0.0198958	0.00192464	0.001474	0.00711361	0.0284381	1.32447e-05	6.21009e-11	0.0115112	6.93605e-17	0.00273834	0.0158054	0.317328	0.0186746	0.0579088	0.0529602	0.0013247	2.039e-13	1.05707e-16	0.00906365	0.000251766	4.69257e-11	0.00277591	7.88217e-12	0.0107249	0.010351	0.000672214	0.00774767	0.813689	0.0493076	8.77591e-17	0.026163
2002-06-02	2.46686e-08	0.0331578	3.05927e-16	0.016987	0.0840006	0.211075	0.0343825	0.040748	0.00199979	0.0307298	0.184731	0.00370959	0.0350123	8.74604e-09	0.0116545	0.0460618	0.0351492	0.00014094	0.0200412	0.00169679	0.00155064	0.00735933	0.0284149	1.69271e-05	5.44537e-11	0.0117116	8.82818e-17	0.00225153	0.0163393	0.288725	0.0219755	0.0595476	0.0548125	0.000679358	3.26868e-13	1.34387e-16	0.00899934	0.000299049	4.00162e-11	0.00266329	7.16149e-12	0.0112439	0.010951	0.000695986	0.00764415	0.815146	0.0503778	6.63605e-17	0.0269007
2002-06-03	2.87539e-08	0.0341465	5.69635e-16	0.0188063	0.0916139	0.200342	0.0318461	0.0401503	0.00195626	0.031157	0.188893	0.00377227	0.0339028	1.50057e-08	0.011634	0.0445039	0.0353503	9.36246e-05	0.0202361	0.00152003	0.00164526	0.00767335	0.0285066	2.30529e-05	4.837e-11	0.011953	1.29635e-16	0.00190226	0.0168969	0.265017	0.0259827	0.0613486	0.0568182	0.000479156	6.30769e-13	1.76324e-16	0.00895834	0.00036322	3.63154e-11	0.00256768	6.6001e-12	0.0117915	0.0116089	0.000730485	0.00759698	0.816605	0.0514721	5.52385e-17	0.0276605
2002-06-04	3.37941e-08	0.0351556	1.08025e-15	0.020845	0.0998594	0.191912	0.0296705	0.0396305	0.00192032	0.0316701	0.193087	0.00384184	0.0329884	2.69843e-08	0.0117175	0.0430908	0.0356163	6.70575e-05	0.0204542	0.00137367	0.00174992	0.00804636	0.028675	3.27989e-05	4.33981e-11	0.0122057	2.08305e-16	0.00163208	0.0174702	0.24581	0.0306979	0.0632593	0.0589341	0.000389381	1.32244e-12	2.34072e-16	0.0089336	0.000442339	3.55264e-11	0.002485	6.14911e-12	0.0123568	0.012307	0.00076902	0.00759236	0.818034	0.0525778	5.20681e-17	0.0284346
2002-06-05	3.97503e-08	0.0361691	2.0053e-15	0.0230607	0.108526	0.184613	0.0277298	0.0391398	0.00188869	0.0322324	0.197262	0.00391425	0.0321464	4.91574e-08	0.0118433	0.0417403	0.0359203	4.7416e-05	0.0206798	0.0012423	0.00185753	0.00846676	0.028896	4.80021e-05	3.90854e-11	0.0124672	3.4762e-16	0.00140276	0.0180534	0.228837	0.0361232	0.0652327	0.0611147	0.00033402	2.83192e-12	3.10982e-16	0.00891905	0.000536352	3.77715e-11	0.00241004	5.76092e-12	0.0129308	0.013036	0.00080817	0.00761839	0.819416	0.0536819	5.6247e-17	0.0292147
2002-06-06	4.67392e-08	0.0371826	3.7089e-15	0.0254503	0.117574	0.179499	0.0260602	0.0387101	0.00186059	0.0328332	0.201411	0.00398886	0.0314466	9.01288e-08	0.0120698	0.0405115	0.0362538	3.52814e-05	0.0209081	0.00113174	0.00197234	0.00893282	0.029161	7.16106e-05	3.55094e-11	0.0127336	5.88328e-16	0.00122112	0.018645	0.217067	0.0423224	0.0672629	0.0633506	0.00033535	6.06681e-12	4.14035e-16	0.00891232	0.000646999	4.40432e-11	0.00234143	5.42166e-12	0.0135113	0.0137942	0.000850054	0.00767105	0.820769	0.0547821	6.91475e-17	0.0299992
2002-06-07	5.52531e-08	0.0382087	6.98579e-15	0.0280643	0.112198	0.173045	0.0246523	0.0383586	0.00183853	0.0334879	0.205536	0.00401336	0.0309293	6.69242e-08	0.0116821	0.0394034	0.0366264	2.8167e-05	0.0211462	0.00104006	0.00210011	0.00945634	0.0294789	0.00010874	3.26208e-11	0.0130096	1.0133e-15	0.00107913	0.0192504	0.200317	0.0402658	0.0662888	0.0656686	0.000206823	1.31762e-11	5.54314e-16	0.00891492	0.000780471	5.61966e-11	0.00228261	5.15119e-12	0.0141055	0.0145929	0.00089723	0.00775484	0.822077	0.0558885	9.50054e-17	0.0307935
2002-06-08	6.56638e-08	0.0392534	1.31881e-14	0.0309732	0.107464	0.166112	0.0234055	0.0380457	0.00182171	0.0342354	0.209686	0.00404186	0.0305044	5.20566e-08	0.0112537	0.0383979	0.0370658	2.39466e-05	0.0214114	0.000963186	0.00223756	0.01006	0.0298801	0.000168367	3.01249e-11	0.0132973	1.76644e-15	0.000966534	0.0198721	0.182566	0.0384792	0.0654064	0.0681176	0.000100118	2.89389e-11	7.48401e-16	0.00893425	0.00094183	7.75926e-11	0.00223197	4.93535e-12	0.0147165	0.015439	0.000947918	0.00788588	0.823368	0.0570053	1.40496e-16	0.0316018
2002-06-09	7.82729e-08	0.0403137	2.49405e-14	0.0341725	0.103372	0.15938	0.0223117	0.0377747	0.00180901	0.0350576	0.213852	0.00407487	0.0301771	4.2643e-08	0.0108404	0.0374788	0.0375584	2.13837e-05	0.0216956	0.000897826	0.00238565	0.0107415	0.0303507	0.000263638	2.79869e-11	0.0135977	3.09108e-15	0.00087554	0.0205094	0.165519	0.0369605	0.064624	0.0706792	4.79267e-05	6.37431e-11	1.01659e-15	0.00896675	0.00113494	1.13315e-10	0.00218761	4.75919e-12	0.0153427	0.0163324	0.00100255	0.00805838	0.824644	0.0581303	2.16241e-16	0.0324227
2002-06-10	9.31809e-08	0.0413133	4.64302e-14	0.0376088	0.0997029	0.153115	0.0213411	0.0375315	0.00179915	0.0359255	0.217643	0.00410908	0.02991	3.58788e-08	0.0104573	0.036628	0.038083	1.95364e-05	0.0219875	0.000840604	0.00254059	0.0114905	0.0308712	0.000412797	2.61166e-11	0.013876	5.36274e-15	0.00079921	0.0210454	0.149963	0.0356027	0.0638997	0.0733152	2.34195e-05	1.38783e-10	1.37731e-15	0.00900811	0.00136036	1.69572e-10	0.00214779	4.60921e-12	0.0159222	0.0172158	0.00105944	0.00826446	0.825809	0.059127	3.36995e-16	0.0331864
2002-06-11	1.1096e-07	0.0412132	8.64949e-14	0.0413298	0.096801	0.147622	0.0205032	0.0373325	0.00179224	0.0368532	0.207274	0.00415083	0.0297437	3.261e-08	0.0101226	0.0358544	0.0386484	1.86592e-05	0.0222932	0.000791988	0.00270771	0.0123202	0.0314509	0.000646243	2.45372e-11	0.0138744	9.26194e-15	0.000737434	0.0205693	0.136671	0.0345737	0.063321	0.0760506	1.21916e-05	3.0049e-10	1.86715e-15	0.00906032	0.00162497	2.58059e-10	0.00211237	4.48442e-12	0.0141191	0.0153017	0.00112094	0.00850991	0.82244	0.0568964	5.28594e-16	0.0314269
2002-06-12	1.3206e-07	0.0405781	1.60786e-13	0.0381244	0.09372	0.142339	0.0197711	0.0371688	0.00178753	0.0361478	0.195859	0.00408252	0.0296575	2.01769e-08	0.00980182	0.0351379	0.0382089	1.83169e-05	0.0220025	0.000749463	0.00288685	0.0116248	0.0308811	0.000521945	2.31785e-11	0.0135799	1.58961e-14	0.000685612	0.019923	0.124284	0.033088	0.0625538	0.0743987	6.36433e-06	6.45476e-10	2.54367e-15	0.00894493	0.00193394	3.98512e-10	0.00208006	4.37677e-12	0.0122399	0.0132898	0.00118687	0.00822235	0.818455	0.0544497	8.29036e-16	0.0295393
2002-06-13	1.56877e-07	0.0394007	2.94578e-13	0.0352654	0.0903991	0.136698	0.0191267	0.0370305	0.0017855	0.0354896	0.182353	0.00400861	0.0296267	1.18581e-08	0.00946018	0.0344797	0.0377943	1.84153e-05	0.0217253	0.000712439	0.00307491	0.0109957	0.0303399	0.000423486	2.19918e-11	0.0130973	2.70115e-14	0.000642302	0.0190547	0.111559	0.0314401	0.0617092	0.0728143	3.09669e-06	1.37101e-09	3.45698e-15	0.00883547	0.00228957	6.13869e-10	0.00205179	4.29028e-12	0.0101183	0.0111763	0.00125589	0.00796038	0.813262	0.0514952	1.29324e-15	0.0273252
2002-06-14	1.85652e-07	0.0377454	5.29715e-13	0.0327436	0.0870519	0.130804	0.0185563	0.0369128	0.00178517	0.034887	0.168958	0.00393272	0.0296381	6.81157e-09	0.00910404	0.03387	0.0374112	1.87689e-05	0.0214654	0.000679642	0.00327051	0.0104327	0.0298342	0.000346212	2.09443e-11	0.0122089	4.52494e-14	0.000605268	0.0180463	0.0989029	0.0297945	0.0608307	0.0713117	1.41375e-06	2.86221e-09	4.67427e-15	0.0087332	0.00269298	9.36445e-10	0.00202616	4.21638e-12	0.00816595	0.00907316	0.00132743	0.00772511	0.807564	0.0484997	1.99595e-15	0.025163
2002-06-15	2.18929e-07	0.0357927	9.32957e-13	0.0305198	0.0838996	0.125206	0.018045	0.036809	0.0017867	0.034337	0.15648	0.00385977	0.0296771	3.96555e-09	0.00876628	0.0333206	0.0370592	1.97339e-05	0.0212229	0.000651877	0.00347243	0.00992941	0.0293631	0.000285386	2.0003e-11	0.0112599	7.48093e-14	0.000575443	0.0170543	0.0875591	0.0282556	0.059973	0.0698904	6.49305e-07	5.88328e-09	6.29339e-15	0.00863795	0.00314821	1.41391e-09	0.00200335	4.15593e-12	0.00657946	0.00738236	0.00140091	0.00751402	0.801764	0.0456808	3.0488e-15	0.0231839
[truncated: 268 more rows]
[truncated: 5 more columns]

## Sheet: Mixed grass patch density
Mixed grass patch density (patches/m2) time series by land unit
ID	1	2	3	4	5	6	7	8	9	10	11	12	13	14	15	16	17	18	19	20	21	22	23	24	25	26	27	28	29	30	31	32	33	34	35	36	37	38	43	44	45	46	47	48	49	50	51	52	53
Community	1	2	3	4	5	6	7	8	9	10	11	12	13	14	15	16	17	18	19	20	21	22	23	24	25	26	27	28	29	30	31	32	33	34	35	36	37	38	4	9	10	11	15	18	22	23	24	25	28
[truncated: 366 more rows]
[truncated: 6 more columns]

## Sheet: Green forbs patch density
Green forbs patch density (patches/m2) time series by land unit
[truncated: 368 more rows]
[truncated: 6 more columns]

[truncated: 1 more sheets: Canopy bark patch density]
