# Supplementary material for: Determinants of seasonal changes in availability of food patches for elephants (Loxodonta africana) in a semi-arid African savanna
Source: PeerJ. 2017 Jun 20;5:e3453. doi: 10.7717/peerj.3453 (PMC5480392; doi:10.7717/peerj.3453)
Supplement: Supplemental Information 2 [file peerj-05-3453-s002.xlsx]

## Sheet: Green grass
Calibration data for the relationship between the density of green grass patches (patches/m2) and soil water (mm)
Community	Burnt	Date	Average of green grass patch density (patches/m2)	Average of previous 5 days soil water (mm)	Average of previous 10 days soil water (mm)	Average of previous 15 days soil water (mm)	Average of previous 20 days soil water (mm)	Average of previous 25 days soil water (mm)	Average of previous 30 days soil water (mm)	Average of previous 45 days soil water (mm)	Average of previous 60 days soil water (mm)
1	0	2002-01-19	0.36	27.9602	30.3361	35.0774	39.1304	39.0023	38.1969	41.7612	43.3145
1	0	2002-01-20	0.28	26.7678	29.2455	33.2866	37.6373	38.8303	37.6654	41.2774	43.1602
1	0	2002-04-24	0	36.061	38.9324	32.8892	27.2953	24.1498	22.2803	18.6428	16.9161
1	0	2002-07-10	0	14.1161	14.667	15.005	15.4641	15.4228	15.6623	16.7702	16.4762
1	0	2002-09-07	0	11.216	11.2468	11.7317	12.4347	13.3603	14.4312	17.4278	17.255
1	0	2002-11-24	0.49	25.8056	30.5436	36.0475	39.205	37.1059	33.5805	29.8449	28.7248
1	0	2003-06-05	0.136	21.0288	22.0359	23.2427	24.4543	24.7424	24.832	25.5589	28.5924
2	0	2002-01-25	0.186667	16.8004	19.9827	22.8601	26.7947	30.5531	32.1991	33.7121	36.5718
2	0	2002-01-27	0.28	21.7882	24.0147	27.4434	28.7749	30.6033	33.7571	35.4655	36.4291
2	0	2002-05-03	0.016	18.9805	23.8807	27.6776	30.281	27.0771	23.8828	18.8592	16.5046
2	0	2002-08-01	0.032	22.3972	23.8172	21.4385	19.5478	18.7229	18.4765	19.0301	20.3528
2	0	2002-09-04	0	9.93746	10.5258	11.3088	12.2772	13.4384	14.6924	17.8657	16.5037
2	0	2002-11-25	0.152	21.3013	25.3348	30.246	34.8182	34.1336	31.0196	28.3929	28.3808
2	0	2003-07-16	0.008	37.9532	40.3415	42.7922	42.9647	38.2282	34.5928	28.3307	25.9082
3	0	2002-01-04	0.376	41.878	42.4274	39.1733	38.0655	38.955	39.4328	37.8921	36.7137
3	0	2002-03-31	0.07	11.3472	10.4993	9.72374	9.28109	9.11173	9.18899	10.9331	11.8486
3	0	2002-06-20	0	22.0463	23.9624	25.7454	27.2965	27.7652	25.1178	22.0836	23.5553
3	0	2002-09-15	0	31.219	25.937	19.8281	16.9738	15.5253	14.8465	15.1258	15.9013
3	0	2002-11-29	0.008	13.0851	15.7258	19.1193	23.3846	26.3885	25.681	20.6543	18.651
4	0	2002-01-18	0.91	22.4248	23.1302	26.2786	29.0299	29.147	28.4006	30.5493	31.3687
4	0	2002-01-19	0.84	18.6679	21.348	25.7383	28.3458	27.4313	26.7547	29.7698	31.2926
4	0	2002-04-23	0.04	32.9435	34.703	27.2335	21.9058	18.7964	16.8235	13.6335	12.3726
4	0	2002-07-09	0	13.4458	14.2466	15.1058	15.8429	16.0805	16.7183	18.6236	16.7952
4	0	2002-09-02	0	9.93144	10.5714	11.3431	12.3092	13.3968	14.4765	17.1943	16.559
4	0	2002-10-25	0.136	16.5941	16.1489	18.1177	19.507	19.5125	19.4412	21.1582	19.0858
4	0	2002-12-28	0.232	35.074	39.0063	30.6069	26.5675	23.5964	21.9387	22.3315	25.0175
4	0	2003-04-16	0.52	21.2917	24.1634	26.2494	28.5091	28.9602	27.7575	30.3419	30.8501
4	1	2002-02-27	0.12	11.1348	13.0431	12.0943	11.9534	12.2875	13.1621	15.1307	18.7715
4	1	2002-05-28	0	13.3626	12.0006	12.1224	12.7503	13.6959	14.9638	21.0162	18.4061
4	1	2002-08-27	0	8.39121	9.11925	10.0717	11.0957	11.6441	11.9772	12.5136	13.0073
5	0	2001-12-22	0.43	29.1378	34.1337	36.6875	36.9779	37.4316	37.4285	36.7389	29.3916
5	0	2001-12-23	0.56	27.7372	32.3576	35.3063	35.9654	36.5678	36.377	36.7396	29.324
5	0	2002-03-22	0	9.63382	8.91261	8.45463	8.37535	8.62612	9.16945	9.84468	10.7381
5	0	2002-06-10	0	18.5482	19.4627	19.7772	17.5541	16.5047	16.1189	16.9473	20.9431
5	0	2002-09-03	0	8.86075	9.50643	10.3383	11.3783	12.6064	13.8435	16.7346	15.2935
5	0	2002-11-26	0.048	16.3075	19.6193	23.7811	28.2932	28.7862	26.5545	24.189	25.1876
5	0	2003-03-13	0.504	38.9317	41.6604	39.6056	39.9523	37.7151	37.2803	31.359	30.2289
6	0	2001-11-14	0.16	42.5284	25.3117	19.2163	16.324	14.8244	13.8996	12.8611	13.9295
6	0	2002-03-11	0	7.60067	7.93743	8.58594	9.50316	10.0033	9.94901	10.6502	12.7938
6	0	2002-06-11	0	16.8157	17.6367	18.6273	16.6578	15.7519	15.4553	16.3603	20.7271
6	0	2002-09-24	0.224	19.3601	22.4736	26.4847	24.1217	21.0363	19.1686	17.4913	18.365
6	0	2002-11-11	0.584	42.7517	37.1769	30.0999	26.7081	25.2604	25.2043	26.4665	25.4008
6	0	2003-03-14	0.48	37.597	41.358	40.0838	40.4409	38.7099	37.8668	32.1628	30.5064
7	0	2001-12-20	0.26	32.0797	36.0188	37.5832	36.867	36.2567	37.0174	34.7495	27.6253
7	0	2001-12-21	0.44	30.4311	34.807	36.9921	35.366	34.7891	35.4253	34.537	27.3518
7	0	2002-03-20	0.008	7.98284	7.1353	7.04948	7.26307	7.79935	8.67093	9.4658	10.9184
7	0	2002-06-09	0.008	18.0097	18.9321	18.3156	16.2544	15.3193	15.0297	16.1765	19.8638
7	0	2002-09-08	0	8.73779	8.19	8.41185	8.95975	9.76285	10.7786	13.8026	13.867
7	0	2002-10-11	0.424	26.2904	23.298	22.7279	20.9937	21.1019	22.4045	19.6043	17.5987
7	0	2002-12-09	0.088	8.64853	9.38159	10.4206	12.2803	14.9342	18.362	20.5456	20.0886
7	0	2003-04-10	0.56	30.735	31.7175	34.3223	32.7356	31.1083	31.3981	34.2673	34.389
8	0	2002-01-15	0.786667	36.2059	39.5994	43.819	46.1625	43.508	43.3424	46.2489	47.6486
8	0	2002-01-17	0.98	41.0291	41.5732	43.0369	46.7746	45.4828	44.2783	46.7058	47.5785
8	0	2002-04-21	0.024	46.5822	46.8777	34.3292	28.0834	24.3946	22.0072	18.2552	16.6764
8	0	2002-07-05	0.008	14.1479	13.331	13.2316	13.2342	13.4187	13.676	14.1918	15.5298
8	0	2002-09-12	0.04	24.7405	17.8686	15.8195	15.1415	15.0831	15.4395	17.5056	18.4366
8	0	2002-11-22	0.54	30.5264	36.1581	42.0729	40.9138	36.4133	32.3607	26.5073	24.3649
8	0	2003-02-22	0.864	40.236	41.0977	40.5531	35.3977	33.1787	31.9631	36.0303	34.8566
8	0	2003-04-19	0.36	23.5191	25.0592	27.4304	29.5932	32.0432	32.0286	36.8953	39.8598
9	0	2002-01-22	0.2	25.6271	29.7047	32.4742	35.604	38.8599	38.1525	40.2805	42.1724
9	0	2002-04-28	0	31.1873	34.6055	37.3885	32.3328	27.6499	24.6093	20.0842	17.5914
9	0	2002-07-16	0	12.0806	12.5544	13.0384	13.1285	13.2574	13.3284	14.1357	14.4866
9	0	2002-09-10	0	24.328	17.589	15.6932	15.1631	15.2634	15.8073	18.0281	18.2401
9	0	2002-12-01	0.296	16.2181	18.7405	22.255	26.7075	31.608	31.985	27.1418	26.5983
9	0	2003-06-06	0.04	16.2503	17.0767	17.9955	18.9619	19.4302	19.5779	20.1015	22.3661
9	1	2002-02-06	0.016	16.195	16.7557	17.4952	19.3226	21.953	24.3158	30.4328	33.9012
9	1	2002-05-11	0	21.4861	23.2822	23.6479	26.843	30.3064	32.0889	24.5193	21.1624
9	1	2002-08-11	0	20.0008	20.3704	21.0376	22.0147	20.9686	19.438	17.3688	16.5176
9	1	2002-10-22	0	18.1208	19.886	22.637	22.4523	22.9557	22.1999	24.4567	21.2018
9	1	2003-01-25	0.576	26.8055	32.5619	39.1747	36.0909	34.4048	33.8288	33.4138	29.1219
9	1	2003-07-08	0.016	41.4468	41.7288	36.3093	31.3628	28.6559	26.7307	23.5297	22.8611
10	0	2002-01-23	0.776	26.1814	31.7559	32.9147	34.9006	38.051	38.6064	39.5216	40.9413
10	0	2002-04-22	0.008	35.1886	36.5342	28.5932	23.6354	20.7236	18.8565	16.0235	14.6886
10	0	2002-07-08	0	12.4658	12.3002	11.8756	11.7418	11.7375	11.8635	12.2056	12.9576
10	0	2002-09-16	0	23.6224	22.6854	18.5278	16.647	15.7906	15.5009	16.5053	17.9106
10	0	2002-11-02	0	18.3708	14.8066	14.0027	13.8859	14.396	14.8569	15.7329	16.8284
10	0	2003-01-06	0.584	29.2648	28.7649	31.682	34.6762	33.9834	32.8196	27.4325	30.1644
10	0	2003-02-21	0.584	35.8925	39.5958	37.2721	32.4002	30.6982	29.3732	32.6142	31.9048
10	0	2003-04-18	0.328	24.5633	26.4351	28.8298	31.148	33.3445	33.1226	38.5182	40.8575
10	1	2002-02-19	0.15	13.4868	12.9901	13.1644	13.6478	14.4937	15.8724	22.4482	27.4249
10	1	2002-03-04	0.08	10.6667	11.4847	12.5555	12.549	12.7575	13.1046	15.7335	21.1844
10	1	2002-05-14	0.112	20.0634	21.7043	21.7769	24.7414	28.08	31.6628	26.3828	22.1922
10	1	2002-08-15	0	18.3482	19.6857	20.5797	21.6517	22.8979	21.7297	18.4752	16.8798
11	0	2002-01-22	0.44	24.8145	28.9603	31.2949	33.8003	37.3932	36.9337	38.5934	40.3872
11	0	2002-04-26	0	17.5902	19.0868	18.306	15.6071	14.0124	12.9929	11.5622	10.7732
11	0	2002-07-15	0	10.9284	11.4289	11.9001	11.5977	11.5309	11.4817	11.9698	12.261
11	0	2002-09-28	0	16.1755	15.644	16.6124	18.3576	16.7228	15.5771	14.6813	15.7508
11	0	2002-11-13	0.528	45.8455	44.2159	37.1407	31.1947	28.2251	26.3295	25.3197	23.3319
11	0	2003-01-07	0.373333	24.7131	26.3703	29.7735	34.0918	31.5812	30.2314	25.0497	27.5381
11	0	2003-06-11	0.088	16.5629	17.045	17.9153	18.9752	20.1384	20.7258	19.6986	20.0466
11	1	2002-05-15	0	19.4817	20.8157	20.5694	22.9634	25.6221	28.4965	24.9476	21.6192
11	1	2002-08-16	0	16.4185	17.68	18.4151	19.2233	20.2509	19.7077	16.9485	15.4555
11	1	2003-01-26	0.128	23.5655	28.7746	35.4844	34.8876	33.383	32.5101	33.2448	29.0501
11	1	2003-07-12	0.024	33.0581	34.9635	35.098	31.4895	27.9309	25.7318	21.5922	20.3059
12	1	2002-02-25	0.584	31.5369	32.8295	32.5593	33.5513	35.0307	36.8022	43.8256	51.9801
12	1	2002-05-23	0.224	33.2214	34.657	36.2706	38.042	38.1349	40.8037	45.2909	38.8178
12	1	2002-08-25	0.056	22.7043	23.4205	24.2033	24.9659	25.5182	26.0447	25.905	25.3803
12	1	2002-10-24	0.12	23.767	24.4104	25.4984	26.651	27.7569	28.3126	31.0991	29.1059
12	1	2003-01-27	0.168	47.007	51.7474	58.2007	58.2726	54.5442	51.5351	46.7917	42.1105
12	1	2003-06-22	0.016	31.1703	31.8643	31.7738	31.5507	31.7756	32.2414	33.8174	35
13	0	2001-12-26	0.24	37.2611	42.7488	48.4732	51.4764	52.0731	53.0088	53.1332	44.1934
13	0	2001-12-28	0.44	43.6447	43.4986	47.8336	50.9393	52.0603	53.1902	53.728	45.7018
13	0	2002-03-26	0	12.5855	12.9757	12.9416	12.8489	12.8144	12.9513	13.841	15.5197
13	0	2002-06-16	0	14.6464	14.9339	15.2095	15.0412	14.9007	14.9411	15.804	17.8217
13	0	2002-09-26	0	18.8077	20.4766	22.3702	23.025	21.2422	20.2135	19.7487	20.977
13	0	2002-11-12	0.104	59.8907	52.6596	43.3977	37.8025	34.9816	33.4179	32.9845	30.258
13	0	2003-01-18	0.936	53.5819	54.6284	45.7252	42.5871	42.2236	43.8223	38.4155	35.2437
13	0	2003-04-27	0	24.1662	25.8074	26.6723	28.3317	30.3793	32.5159	35.4383	40.7065
14	0	2001-12-29	0.92	46.8863	43.4037	46.3483	49.3114	50.9574	52.1291	53.0205	45.8964
14	0	2001-12-30	0.64	55.2283	49.4433	51.5312	54.8706	57.0512	58.0016	58.6046	51.4316
14	0	2002-03-28	0	12.9042	13.4661	13.6655	13.5329	13.3064	13.3237	14.2527	16.3537
14	0	2002-06-17	0	13.3237	13.7285	14.1045	14.1952	13.9777	13.9058	14.7446	16.8159
14	0	2002-09-14	0	40.5494	31.7244	26.6664	24.4943	23.6038	23.4381	24.9224	25.8411
14	0	2002-10-17	0.38	27.6671	31.3715	30.1579	30.421	29.0853	29.1803	29.5799	26.4233
14	0	2002-12-12	0.56	25.7208	23.7153	24.2023	25.8261	28.6334	32.5607	37.5356	34.8695
15	0	2002-01-28	0.064	21.4517	23.6157	27.9435	28.1235	30.5817	33.7201	34.5104	37.2119
15	0	2002-05-01	0	26.4425	33.1629	38.3717	41.473	34.8598	30.478	23.4759	20.1374
15	0	2002-07-23	0	13.9671	12.3569	11.9805	11.9788	12.0831	12.2301	12.9747	13.8248
15	0	2002-09-29	0	19.1811	20.1564	22.3626	25.4351	23.7673	21.3757	17.9224	17.0092
15	0	2003-01-09	0.08	21.4401	23.346	24.2826	26.5818	26.0887	24.739	21.4163	23.8399
15	0	2003-06-07	0	14.3945	15.0675	15.7951	16.5975	17.2118	17.2731	17.1927	18.75
15	1	2002-02-09	0.12	15.9357	16.9452	18.0297	18.8665	21.0797	22.8892	29.6163	31.8356
15	1	2002-05-13	0	21.635	23.4383	23.6443	26.8959	30.5312	34.0544	27.0472	22.9343
15	1	2002-08-14	0	16.3231	17.1469	17.4857	18.1141	18.5403	17.4721	15.7877	15.2413
15	1	2002-11-08	0	41.0299	31.44	25.6163	23.4377	22.4282	22.7011	22.4242	23.868
15	1	2003-01-28	0	23.6034	26.8223	32.3693	35.7666	33.2758	32.1183	31.7449	27.8692
15	1	2003-07-06	0	40.5596	37.7072	31.2652	27.5662	25.6001	23.8617	21.6126	21.2252
16	0	2001-12-28	0.61	35.5125	34.8344	38.6322	41.3227	42.5104	43.6804	44.5365	38.1353
16	0	2001-12-29	0.76	40.4915	36.3766	38.8528	41.4734	42.9395	44.02	45.1534	39.2137
16	0	2002-03-25	0	9.96092	10.435	10.2306	9.99509	9.90364	10.0049	10.8441	12.5647
16	0	2002-06-15	0	11.0001	11.2431	11.3702	11.1849	11.0952	11.1584	12.0199	13.7942
16	0	2002-09-23	0	19.2037	21.5367	24.5423	21.2462	19.2113	18.0618	17.5639	18.8829
16	0	2003-01-19	0.728	40.3955	46.5502	37.7533	34.7137	34.1299	35.3653	31.5204	28.1771
16	0	2003-04-28	0	19.6652	21.2348	22.1378	23.5546	25.5381	27.4881	30.0485	34.58
17	0	2001-12-29	0.8	50.8599	48.2689	51.7277	55.0784	56.9243	58.191	58.8149	50.7306
17	0	2002-03-28	0	11.0639	11.597	11.7447	11.5585	11.3552	11.3691	12.117	13.5508
17	0	2002-06-17	0	14.8972	15.2767	15.6268	15.6607	15.4826	15.4548	16.3279	18.2349
17	0	2002-09-14	0	32.4074	25.6871	21.5204	19.7432	19.0396	18.9583	20.3999	21.3413
17	0	2002-10-17	0.0266667	25.2167	29.0325	28.308	28.9232	26.7129	25.9606	25.1197	22.3787
17	0	2002-12-12	0.51	22.7496	19.5993	19.4966	20.6316	22.9357	26.3646	31.1879	29.0627
17	0	2003-04-26	0	24.8459	26.4782	27.6209	29.755	31.9527	34.4086	35.9027	40.1492
18	0	2001-12-21	0.4	36.2834	41.4477	43.4955	42.5508	42.5798	43.1191	38.7789	31.1235
18	0	2002-03-21	0	10.5338	9.82052	9.50909	9.453	9.7221	10.2643	11.0169	12.4799
18	0	2002-06-08	0	13.3273	13.2771	13.0292	13.0227	13.3512	13.9322	16.5734	20.6037
18	0	2002-10-09	0	22.0201	21.7878	20.8244	20.3371	21.0865	22.8058	19.2699	18.1042
18	0	2003-01-04	0.136	26.8849	29.039	33.0849	32.5931	31.2513	28.411	24.438	28.1162
18	0	2003-03-12	0.376	48.8222	49.8107	48.0656	48.1874	45.1318	45.0374	37.2727	36.7349
18	1	2002-02-08	0.192	14.0745	14.8357	15.8795	17.3779	20.1536	22.0516	28.6819	30.9903
18	1	2002-05-12	0	19.0109	20.6731	20.9898	23.9337	27.2225	29.9994	23.2404	19.826
18	1	2002-08-12	0.008	18.6213	19.3487	20.0691	21.1069	20.8541	19.1415	16.6766	15.4362
18	1	2002-11-03	0	21.0765	15.7395	14.5304	14.1474	14.5869	15.0532	15.7768	17.0766
18	1	2002-12-18	0.016	17.3342	18.2311	16.0698	15.52	15.9108	17.3002	24.5218	22.5526
18	1	2003-07-05	0.048	37.5205	33.3402	27.2496	24.0489	22.3262	20.693	18.7841	18.3005
19	0	2002-02-04	0.496	13.3686	14.4079	14.6086	16.4691	17.9211	19.7295	25.0184	28.3464
19	0	2002-05-06	0	19.6755	19.7737	23.4113	27.1713	28.5522	25.1519	20.3661	17.16
19	0	2002-08-03	0.048	17.5267	18.7339	18.5886	16.8724	16.0703	15.8874	16.8798	18.2627
19	0	2002-10-13	0.224	12.3662	12.3642	12.7617	13.3298	14.6753	16.7117	16.8596	15.0848
19	0	2003-06-18	0	15.4843	14.619	13.5446	13.351	13.5542	14.0202	14.0946	14.4777
20	0	2001-11-27	0.456	56.8408	55.8246	51.6133	47.2845	40.061	35.3627	28.1537	25.0174
20	0	2002-03-13	0	11.9601	12.0438	12.4441	13.074	13.8673	13.9527	15.2678	18.6562
20	0	2002-03-15	0	12.1866	12.1108	12.2844	12.7433	13.4334	13.7744	15.0647	18.6674
20	0	2002-06-12	0	17.1884	17.6606	17.8971	17.4106	17.1864	17.2973	18.4392	22.2633
20	0	2002-09-13	0	38.7814	27.006	22.6217	20.7994	20.1003	20.0548	21.5049	22.1431
20	0	2002-11-18	0.504	45.357	51.7713	51.5876	46.0114	40.9189	38.2379	35.8094	33.6737
20	0	2003-03-10	0.712	64.4032	60.6117	60.019	58.0902	56.0291	55.4472	45.0713	45.3653
21	0	2001-12-14	0.28	52.9966	52.3891	51.9646	50.1369	49.6822	49.8465	41.906	34.9433
21	0	2002-03-16	0	14.2689	13.292	12.5138	12.3879	12.663	13.2665	15.0711	17.4005
21	0	2002-03-19	0	13.3419	12.8876	12.4314	12.5477	13.0721	13.9663	15.9671	18.1767
21	0	2002-06-14	0	21.9922	22.958	23.5758	23.0366	21.5694	20.882	20.8734	24.9828
21	0	2002-09-22	0.008	32.3278	36.8784	40.0955	33.1117	29.0672	26.6381	24.2575	25.0704
21	0	2002-10-18	0.056	16.2561	17.858	18.643	19.4735	20.2275	21.6596	25.1292	22.3008
21	0	2002-12-06	0	16.0149	17.3027	19.4775	22.6593	26.8505	31.593	29.4379	28.1081
21	0	2003-04-09	0.632	42.1144	43.7895	47.1573	44.249	42.862	43.5659	46.7865	46.1413
22	0	2002-01-03	0.552	64.1176	59.0183	55.6349	56.0004	57.6421	57.797	56.9129	53.9149
22	0	2002-03-30	0	17.4013	15.9019	15.332	15.0126	15.0195	15.324	17.5279	19.0675
22	0	2002-06-19	0	31.0505	32.9305	34.6287	36.0179	35.4854	32.9618	30.4782	32.1252
22	0	2002-10-03	0.016	26.6287	25.3777	26.1445	28.0272	30.8425	28.181	24.4583	24.4198
22	0	2002-11-21	0.024	41.8645	48.3434	54.7744	50.3566	44.3395	40.3249	34.6841	32.6325
22	0	2003-04-13	0.232	44.9126	48.9546	51.6502	55.141	51.9297	51.3039	54.9918	55.1411
22	1	2002-02-26	0.08	20.905	22.7838	21.0031	20.7355	21.0556	21.9054	26.0565	33.0102
22	1	2002-05-24	0	21.1232	22.3188	23.726	25.3252	27.181	29.4545	34.2835	30.0459
22	1	2002-08-26	0	17.3588	18.4104	19.6894	20.9733	21.4844	21.961	22.5398	23.354
23	0	2002-01-11	0.688	49.6991	56.2166	57.8818	54.5614	54.3102	56.4988	59.2064	60.4314
23	0	2002-04-09	0	17.8625	18.1365	18.4445	18.7195	19.0645	19.1504	20.3329	22.1508
23	0	2002-04-17	0.01	45.6174	31.8084	25.6046	22.607	20.9209	19.9598	18.2214	18.4707
23	0	2002-06-26	0	23.5657	24.1063	25.0351	26.0623	27.0995	28.2479	25.6731	25.7521
23	0	2003-01-03	0.272	36.8166	40.4131	45.3448	41.0453	37.6969	34.6047	32.0506	36.7195
23	0	2003-04-23	0.016	33.178	34.3887	36.6481	39.6193	42.5738	45.3297	47.1521	51.5746
23	1	2002-10-27	0	15.7573	16.2566	16.98	18.0018	19.1325	20.2611	21.9594	21.5793
23	1	2002-02-21	0.184	24.7793	22.9232	23.3476	24.4106	25.5804	26.8818	33.9465	40.6004
23	1	2002-05-20	0	24.8574	26.3819	28.1104	28.1898	30.9877	34.1601	35.9511	30.3101
23	1	2002-08-22	0	18.528	19.6169	20.68	21.621	22.415	23.2451	21.5749	20.2269
23	1	2002-10-10	0	21.4325	21.8441	22.1569	22.6082	23.8229	25.5683	22.9948	21.5061
23	1	2002-11-10	0.064	58.3721	44.6685	35.1824	30.7914	28.3399	27.1276	26.056	26.439
23	1	2002-11-28	0.088	24.0745	27.291	31.0682	35.2392	36.34	34.0657	27.7041	25.4827
23	1	2003-07-04	0.064	41.2662	36.546	31.503	29.2619	28.0004	26.757	25.6271	25.5506
24	0	2002-11-09	0.192	57.0882	46.5989	39.0376	36.6308	35.6519	36.4491	36.8523	36.1396
24	0	2002-01-10	0.552	59.7124	65.1728	65.4752	61.7568	61.6378	63.5707	64.4525	63.2576
24	0	2002-04-08	0	16.7732	17.0521	17.3743	17.8179	18.1807	18.1728	19.1257	20.5865
24	0	2002-06-25	0	26.15	26.1264	26.7758	27.5216	28.2563	28.6837	28.0861	29.522
24	0	2002-09-20	0.144	35.7492	39.3239	36.9717	31.9754	29.2257	27.6973	26.7414	27.5004
24	0	2002-11-09	0.112	60.2651	48.5454	40.9094	38.2736	36.9546	37.2235	36.975	37.3758
24	0	2002-12-08	0.088	24.8257	26.5737	28.9185	32.2559	36.3612	40.985	40.2579	39.0612
24	0	2003-04-25	0.008	35.8416	37.5629	39.3961	42.221	44.4844	47.2281	48.9171	53.8023
24	1	2002-02-06	1	30.1447	31.5838	33.1143	36.0624	39.742	42.2653	49.5542	53.7838
24	1	2002-05-10	0.706667	34.911	32.8507	36.6795	40.2771	43.8294	44.1034	35.0674	31.0309
24	1	2002-08-10	0.848	23.9487	23.7724	24.0918	24.5815	23.8148	23.2073	22.7459	23.0481
24	1	2002-10-21	0.384	23.5473	25.4477	27.2047	27.3552	27.6844	27.5622	30.0485	26.8153
24	1	2002-11-04	0.744	33.3943	27.5661	26.7426	26.5791	27.4759	28.3319	28.9162	30.5913
24	1	2002-12-30	0.936	41.629	45.5608	43.1778	40.4468	37.42	35.4853	36.086	39.9718
24	1	2003-06-25	0.864	27.2008	27.1225	27.5038	26.9453	26.8989	27.1511	28.5662	29.3011
25	0	2002-01-24	0.096	42.9442	48.5994	51.0254	55.6002	60.7105	60.977	64.2707	67.0998
25	0	2002-04-29	0.008	45.0009	48.2316	51.3624	47.5743	41.4125	37.3839	31.1735	28.2721
25	0	2002-07-17	0	22.4917	23.0011	23.5504	24.0593	24.5585	25.0597	26.9982	27.9369
25	0	2002-09-19	0	37.1644	40.237	35.8534	32.1178	30.1937	29.2393	29.2613	30.175
25	0	2002-10-30	0.072	27.1093	29.3884	31.4385	34.3277	36.4303	37.211	36.4672	35.2203
25	0	2002-12-13	0.024	29.7974	28.0056	28.5531	30.0315	32.5044	35.7349	40.6086	38.6168
25	0	2003-02-17	0.52	69.3465	68.6675	58.3164	54.2101	52.3239	52.5137	54.6262	52.4619
25	0	2003-06-09	0.008	28.3899	29.2428	30.1513	31.1914	32.2325	32.5971	34.0994	37.3593
25	1	2002-02-18	0.14	30.4363	31.0562	32.7864	34.4943	36.335	38.3738	46.4224	51.6979
25	1	2002-03-04	0.44	23.983	25.6366	27.6074	27.8916	28.6515	30.0178	34.836	41.8388
25	1	2002-05-18	0	35.8771	37.807	39.925	39.8844	43.2603	46.9146	45.1044	38.4465
25	1	2002-08-20	0	20.9372	21.5414	22.1135	22.2702	22.5298	22.8623	22.5871	23.0421
25	1	2002-12-04	0	27.1419	28.9963	31.6593	34.8481	38.3247	40.406	34.9217	32.5649
25	1	2003-07-13	0	40.9812	42.3505	42.6717	40.27	37.6491	36.1086	33.2993	32.9278
26	0	2002-01-29	0.216	20.4223	20.2871	23.0325	25.1602	27.959	31.0601	32.9036	36.1634
26	0	2002-05-08	0	13.647	13.0479	14.7602	16.4613	17.8466	16.449	13.6858	12.6394
26	0	2002-08-08	0	20.9076	21.7964	23.0468	22.8543	20.4315	18.7998	16.3101	14.7538
26	0	2002-10-01	0	22.1886	20.0136	21.0771	23.2932	24.0375	21.6177	18.4359	18.6227
26	0	2003-01-20	0.488	34.9147	41.9035	35.8451	32.4978	31.4233	32.1646	29.2452	25.8371
26	0	2003-06-08	0.016	19.8516	21.1582	22.597	24.2419	25.935	25.591	22.9085	22.9582
27	0	2001-12-10	0.24	52.5795	51.1534	50.644	51.0649	51.0934	51.1132	38.8542	32.7477
27	0	2001-12-11	0.04	53.1795	50.7531	51.1062	50.8272	51.3557	51.0721	39.8266	33.4418
27	0	2002-03-17	0	12.8588	12.3995	12.0383	12.2131	12.7285	13.3693	15.99	18.5962
27	0	2002-06-13	0	15.0722	15.5063	15.5566	15.1745	14.8538	14.8399	16.0152	19.0627
27	0	2002-09-05	0	12.0947	12.6353	13.3903	14.3116	15.4568	16.6881	20.287	19.062
27	0	2002-10-16	0.06	21.9298	23.6013	22.3818	22.2566	22.7031	24.1973	25.8952	22.9317
27	0	2002-12-03	0.0533333	16.94	18.9167	21.9893	25.9656	30.7409	33.3082	29.0719	26.6724
27	0	2003-03-16	0.39	43.9432	49.2789	50.117	49.9065	49.1118	47.222	41.0175	38.4084
28	0	2002-10-29	0	23.0422	24.3082	25.3496	26.9401	28.6306	30.2865	30.3813	29.6881
28	0	2001-11-26	1	60.2244	57.196	50.3497	44.1733	37.8446	33.6741	27.0234	24.3381
28	0	2002-01-12	1	58.4448	65.4174	68.5748	65.4645	64.8377	66.8793	68.5264	69.0038
28	0	2002-06-27	0	22.4494	22.8552	23.3726	23.9189	24.4442	24.6842	25.9654	28.7593
28	1	2002-04-19	0	54.445	44.3836	33.8524	28.6581	25.6124	23.6776	20.7244	20.3445
28	1	2002-06-07	0	26.5457	26.215	26.308	26.8187	27.6027	28.6029	31.9514	35.6495
29	0	2002-02-04	0.213333	24.5601	25.9523	24.0865	25.1085	26.3131	28.3381	32.513	36.0314
29	0	2002-05-07	0	21.8592	23.7701	26.1737	29.0246	30.397	27.6026	23.5576	20.632
29	0	2002-08-04	0	18.3254	19.2497	19.8603	18.6221	17.8664	17.6455	18.4058	18.8409
29	0	2002-09-06	0	9.98235	10.3244	10.8257	11.4393	12.2171	13.0761	15.1181	15.3564
29	0	2002-11-23	0	26.3613	31.1719	36.7309	37.9316	34.5856	30.9685	25.3789	23.7528
29	0	2003-06-19	0.04	22.9095	22.7919	21.4109	21.232	21.5945	22.3499	23.3315	23.0683
30	0	2002-01-24	0.352	43.828	49.4482	52.1012	56.8854	62.0619	62.3071	65.758	68.7982
30	0	2002-04-30	0	46.0335	48.9311	51.8555	50.2979	44.0648	39.9988	33.7853	30.887
30	0	2002-07-18	0	26.1494	26.6536	27.272	27.8538	28.4184	28.9934	31.1199	32.0464
30	0	2002-09-30	0	39.6723	36.6241	37.2456	38.9231	37.9735	35.3867	32.2836	32.3472
30	0	2002-11-14	0.008	63.6117	62.9594	55.5641	49.197	46.361	45.1567	45.6626	43.589
30	0	2002-12-29	0.048	51.3709	55.8161	49.4901	45.6696	42.3435	40.6813	42.1721	45.5466
30	0	2003-06-14	0.008	33.7187	33.0223	33.4111	34.1122	35.035	36.0192	37.4577	40.4523
30	1	2002-02-18	0.168	33.8251	34.6	36.4943	38.3494	40.3347	42.5256	50.9489	56.3089
30	1	2002-05-17	0.04	40.203	42.1756	44.3873	44.2588	47.7286	51.4163	47.68	40.9589
30	1	2002-08-17	0	19.4394	19.9162	20.1301	20.2869	20.5421	20.6418	20.5233	21.0482
30	1	2003-01-29	0.048	47.283	49.1514	54.196	59.2856	54.8936	52.4121	48.2038	43.2672
30	1	2003-07-14	0.016	42.6069	43.9579	44.8836	42.9978	40.2658	38.6523	35.8758	35.5126
31	0	2002-01-31	0.14	16.5826	14.7121	15.9907	17.8937	20.0645	22.6078	25.1267	28.051
31	0	2002-02-03	0.2	17.2576	17.5691	17.1426	18.6445	20.1343	22.9087	26.382	29.8726
31	0	2002-05-05	0.072	15.0292	19.4285	23.0004	26.5458	26.0374	22.6369	17.2359	14.7273
31	0	2002-08-02	0.168	19.7194	21.2022	19.7502	17.3736	16.1713	15.6397	15.6583	16.7157
31	0	2002-09-09	0.008	14.1701	10.7245	9.90143	9.86891	10.2588	10.9579	13.5454	13.9499
31	0	2003-01-22	0.432	23.5035	29.5948	29.8866	26.8848	25.9733	26.7288	24.8782	21.3018
31	0	2003-06-12	0.024	11.4001	11.0637	11.3786	11.9011	12.5588	13.0456	12.8222	14.0784
32	0	2001-12-23	0.376	58.3941	63.409	66.5519	64.8811	62.8249	62.3707	64.0822	52.1554
32	0	2002-01-08	0.416	67.6807	73.0656	70.3204	68.5934	69.3786	71.14	70.7695	72.2734
32	0	2002-03-29	0	19.1069	18.0323	17.9667	18.081	18.4139	19.0415	21.8875	24.5626
32	0	2002-04-07	0.008	24.4262	25.8683	26.6454	24.8448	23.9187	23.3324	23.8431	25.7484
32	0	2002-06-18	0	37.6273	39.405	40.9848	42.2573	40.6145	38.11	35.6004	36.7625
32	0	2002-06-24	0	33.3239	33.4138	34.4521	35.6065	36.6711	36.4464	33.3216	33.4259
32	0	2002-09-27	0.016	28.9746	31.8061	34.8793	36.9198	33.1841	30.8663	28.3533	28.8512
32	0	2002-10-04	0.096	42.5294	39.9129	38.7092	39.8172	42.2433	39.9567	34.5043	34.0896
32	0	2002-11-19	0.096	51.8005	58.1572	60.0386	54.7769	48.7904	45.527	41.6311	40.9612
32	0	2003-01-21	0.352	58.2315	67.0405	61.8544	55.9835	54.0275	54.3073	47.9741	43.3611
32	0	2003-02-18	0.376	62.502	66.4234	60.5248	59.3275	58.8295	57.2666	57.7	54.976
32	0	2003-04-17	0.032	48.8065	52.5639	56.4414	60.06	62.4145	60.5896	64.5186	64.6224
32	0	2003-04-22	0	48.6101	50.0022	53.1629	56.4667	59.3566	61.4381	61.8093	65.4083
33	0	2002-01-07	0.296	78.0834	79.8306	74.2835	72.8949	74.7474	76.8397	77.6694	76.1607
33	0	2002-04-06	0	20.7604	21.109	21.5306	22.1094	22.2826	22.4226	24.0398	25.9248
33	0	2002-06-23	0	32.7516	33.3435	34.2462	35.1301	35.9768	35.6317	34.6876	35.8076
33	0	2002-09-17	0	46.3972	47.4299	39.5821	35.7465	33.8764	32.9776	33.038	33.7212
33	0	2002-10-28	0.032	35.5452	37.9299	40.4967	43.9958	44.6958	45.2787	43.5062	41.0942
33	0	2002-11-27	0.232	42.3905	46.8784	52.0122	57.1535	56.8728	53.6277	48.9636	48.949
33	0	2002-12-30	0.328	54.7861	59.363	55.1552	50.4972	46.7632	44.5684	45.2606	49.5376
33	0	2003-04-22	0	57.6677	59.2893	62.3928	65.7956	69.0416	70.7343	72.9653	77.2367
33	1	2002-02-19	0	33.77	34.0816	35.3939	37.064	39.1336	41.4886	51.2417	58.3644
33	1	2002-05-21	0	34.8567	36.2228	37.7195	39.3806	39.405	41.9087	43.464	38.2161
33	1	2002-08-23	0	25.0154	26.0747	27.1324	27.9626	28.5711	29.265	28.2893	27.465
33	1	2002-10-23	0	28.8319	29.8837	31.5266	32.2322	32.9294	33.0496	35.9233	32.9258
33	1	2003-01-30	0.2	54.4033	56.8885	62.4164	68.8116	65.5998	63.3433	61.1584	55.8995
33	1	2003-07-09	0	55.1759	56.1371	52.7168	47.8467	45.2025	43.5187	40.6794	40.4776
34	0	2002-01-06	0.392	88.2039	87.1217	81.6188	80.8914	83.1866	85.1528	85.5522	82.0793
34	0	2002-04-01	0	23.1201	23.6232	24.3202	24.4179	24.5033	24.8071	27.1139	29.1804
34	0	2002-06-22	0	35.801	36.5724	37.5317	38.4556	39.3943	38.3918	37.0448	37.8457
34	0	2002-09-25	0.008	39.1391	41.8222	44.6569	43.3534	40.064	38.1885	36.9122	37.9942
34	0	2002-11-20	0.24	57.9665	63.5785	67.2354	62.815	56.8847	53.6555	50.7162	49.6416
34	0	2003-04-11	0.416	71.0283	74.2189	77.8384	77.5545	75.1605	75.4789	79.7385	79.5563
34	1	2002-02-16	0.032	31.9707	33.8743	35.7412	37.6714	39.982	43.3111	54.4824	60.5833
34	1	2002-05-19	0	35.6208	36.9801	38.4398	40.0566	41.9472	44.0988	42.8759	38.1046
34	1	2002-08-21	0	30.1422	31.5005	32.7383	33.497	34.231	35.0771	32.7908	31.5756
34	1	2003-01-31	0.304	50.8671	52.4917	57.4354	63.9229	62.8364	60.7883	59.3371	54.3072
34	1	2003-07-07	0.056	57.1384	55.7901	50.4351	46.4157	44.3017	42.6832	40.6018	40.7038
35	0	2002-03-01	0.064	15.2613	16.48	16.9305	16.9405	17.2891	17.9063	20.5799	27.5426
35	0	2002-05-29	0	20.5179	19.9472	20.3634	21.1462	22.1593	22.395	28.2729	25.5055
35	0	2002-08-28	0	18.2278	19.354	20.7175	22.1749	23.4769	24.5773	25.1766	23.4025
35	0	2003-01-23	0.584	37.2627	43.7092	45.9752	41.9678	40.845	41.5904	40.6015	36.4279
35	0	2003-06-16	0.032	26.4235	24.8957	24.6552	25.089	25.8562	26.8037	27.668	29.2533
36	0	2002-10-29	0	21.0736	22.2961	23.2961	24.86	26.5477	28.2188	28.3265	27.6959
36	0	2001-11-26	1	69.5851	66.492	60.1846	53.2326	45.7592	40.8431	33.0117	29.6745
36	0	2002-01-12	1	53.1043	60.7088	65.2192	62.4462	61.5865	63.4294	66.6881	67.108
36	0	2002-06-27	0	16.0489	16.3591	16.7624	17.1959	17.6191	17.768	18.7586	20.914
36	0	2003-01-24	1	50.7719	58.5437	65.649	58.1386	54.4559	52.1483	47.2379	41.9612
36	0	2003-04-21	1	37.0984	39.2254	42.5729	45.6439	49.0834	49.7931	51.4422	53.6394
36	1	2002-03-12	0	20.8365	21.6284	22.8176	24.3087	25.7032	26.1858	29.9949	35.5911
36	1	2002-04-19	0	58.9829	48.5301	37.775	32.4935	29.4166	27.4841	24.5902	24.4019
36	1	2002-06-07	0	21.0615	20.7032	20.7037	21.0885	21.7323	22.5853	25.6728	29.2811
36	1	2002-10-02	0.032	30.1355	29.7103	31.0991	33.0547	34.4714	31.7385	27.5411	26.1946
36	1	2002-11-05	0.016	29.1409	23.9499	22.5685	22.1537	22.2686	22.669	24.2945	27.1686
36	1	2002-12-31	0.136	33.5316	36.393	36.2459	33.8671	32.0993	30.8677	31.6349	34.9014
36	1	2003-04-29	0.032	31.8102	33.426	34.8706	36.6167	38.8917	41.1269	46.3755	53.3374
37	0	2002-01-21	0.224	69.4613	72.4733	73.8873	77.5168	80.0474	79.3316	82.9774	84.0502
37	0	2002-04-25	0.01	54.9947	57.5693	53.2668	46.9323	43.5155	41.6047	37.1751	35.9138
37	0	2002-07-14	0	35.1378	36.2206	37.1747	38.1482	39.027	39.6915	42.502	41.2361
37	0	2002-10-05	0	50.1099	48.8914	46.9656	47.5066	49.1304	47.9371	42.4406	41.97
37	0	2002-12-05	0.008	37.9223	40.2143	43.5591	47.5577	52.1822	56.1362	51.1711	49.7103
37	0	2003-06-13	0.024	39.3234	39.0987	39.7497	40.6576	41.736	42.8509	44.7713	48.9251
38	0	2002-10-29	0.008	19.2153	20.6077	22.1196	24.1811	25.6386	26.7651	27.093	26.4351
38	0	2002-01-14	0.208	47.2555	53.2772	59.2581	58.0089	56.1765	57.178	61.1891	61.8048
38	0	2002-04-20	0	54.3977	49.1956	37.4362	31.6349	28.2317	26.0578	22.7431	22.1242
38	0	2002-07-04	0	19.7488	20.2334	20.7315	21.3443	22.0646	22.7935	23.6748	24.8318
38	0	2003-01-24	0.24	44.7551	52.4512	59.4198	52.2948	48.7915	46.5513	41.9413	36.9672
38	0	2003-06-17	0	22.7009	22.4524	22.3926	22.7431	23.2835	23.9542	25.0582	27.0096
38	1	2002-02-20	0.032	24.7818	23.5848	24.3375	25.6337	27.3006	28.6532	35.8106	41.8709
38	1	2002-05-22	0	26.5843	28.1013	29.8057	31.7585	32.3712	35.3765	39.6295	33.2854
38	1	2002-08-24	0.008	16.0609	16.5273	17.0327	17.4802	17.7376	18.0202	18.0166	18.0812
38	1	2002-09-18	0	32.1886	35.4372	28.7233	25.1763	23.234	22.0732	20.811	20.5556
38	1	2002-10-26	0	17.0522	17.6946	18.6601	19.7475	20.64	21.4225	24.1033	23.095
38	1	2003-02-01	0.288	39.4217	38.5791	41.4713	46.8923	47.8434	45.2353	40.6816	35.6755
38	1	2003-04-20	0.008	32.7754	34.3885	36.8173	39.1592	41.861	43.2357	50.2069	53.106

## Sheet: Mixed grass
Calibration data for the relationship between the density of mixed grass patches (patches/m2) and soil water (mm)
Community	Burnt	Date	Average of mixed grass patch density (patches/m2)	Average of previous 5 days soil water (mm)	Average of previous 10 days soil water (mm)	Average of previous 15 days soil water (mm)	Average of previous 20 days soil water (mm)	Average of previous 25 days soil water (mm)	Average of previous 30 days soil water (mm)	Average of previous 45 days soil water (mm)	Average of previous 60 days soil water (mm)
1	0	2002-01-20	0.624	27.2447	29.6818	34.0029	38.2345	38.8991	37.878	41.471	43.2219
1	0	2002-04-24	0.712	36.061	38.9324	32.8892	27.2953	24.1498	22.2803	18.6428	16.9161
1	0	2002-07-10	0	14.1161	14.667	15.005	15.4641	15.4228	15.6623	16.7702	16.4762
1	0	2002-09-07	0.12	11.216	11.2468	11.7317	12.4347	13.3603	14.4312	17.4278	17.255
1	0	2002-11-24	0.51	25.8056	30.5436	36.0475	39.205	37.1059	33.5805	29.8449	28.7248
1	0	2003-06-05	0.72	21.0288	22.0359	23.2427	24.4543	24.7424	24.832	25.5589	28.5924
2	0	2002-01-25	0.706667	16.8004	19.9827	22.8601	26.7947	30.5531	32.1991	33.7121	36.5718
2	0	2002-01-27	0.38	21.7882	24.0147	27.4434	28.7749	30.6033	33.7571	35.4655	36.4291
2	0	2002-05-03	0.52	18.9805	23.8807	27.6776	30.281	27.0771	23.8828	18.8592	16.5046
2	0	2002-08-01	0.608	22.3972	23.8172	21.4385	19.5478	18.7229	18.4765	19.0301	20.3528
2	0	2002-09-04	0.192	9.93746	10.5258	11.3088	12.2772	13.4384	14.6924	17.8657	16.5037
2	0	2002-11-25	0.768	21.3013	25.3348	30.246	34.8182	34.1336	31.0196	28.3929	28.3808
2	0	2003-07-16	0.624	37.9532	40.3415	42.7922	42.9647	38.2282	34.5928	28.3307	25.9082
3	0	2002-01-04	0.624	41.878	42.4274	39.1733	38.0655	38.955	39.4328	37.8921	36.7137
3	0	2002-03-31	0.91	11.3472	10.4993	9.72374	9.28109	9.11173	9.18899	10.9331	11.8486
3	0	2002-06-20	0.904	22.0463	23.9624	25.7454	27.2965	27.7652	25.1178	22.0836	23.5553
3	0	2002-09-15	0.928	31.219	25.937	19.8281	16.9738	15.5253	14.8465	15.1258	15.9013
3	0	2002-11-29	0.968	13.0851	15.7258	19.1193	23.3846	26.3885	25.681	20.6543	18.651
4	0	2002-01-18	0.09	22.4248	23.1302	26.2786	29.0299	29.147	28.4006	30.5493	31.3687
4	0	2002-01-19	0.16	18.6679	21.348	25.7383	28.3458	27.4313	26.7547	29.7698	31.2926
4	0	2002-04-23	0.856	32.9435	34.703	27.2335	21.9058	18.7964	16.8235	13.6335	12.3726
4	0	2002-07-09	0.504	13.4458	14.2466	15.1058	15.8429	16.0805	16.7183	18.6236	16.7952
4	0	2002-09-02	0.144	9.93144	10.5714	11.3431	12.3092	13.3968	14.4765	17.1943	16.559
4	0	2002-10-25	0.848	16.5941	16.1489	18.1177	19.507	19.5125	19.4412	21.1582	19.0858
4	0	2002-12-28	0.768	35.074	39.0063	30.6069	26.5675	23.5964	21.9387	22.3315	25.0175
4	0	2003-04-16	0.48	21.2917	24.1634	26.2494	28.5091	28.9602	27.7575	30.3419	30.8501
4	1	2002-02-27	0.38	11.1348	13.0431	12.0943	11.9534	12.2875	13.1621	15.1307	18.7715
4	1	2002-05-28	1	13.3626	12.0006	12.1224	12.7503	13.6959	14.9638	21.0162	18.4061
4	1	2002-08-27	0.04	8.39121	9.11925	10.0717	11.0957	11.6441	11.9772	12.5136	13.0073
5	0	2001-12-22	0.57	29.1378	34.1337	36.6875	36.9779	37.4316	37.4285	36.7389	29.3916
5	0	2001-12-23	0.44	27.7372	32.3576	35.3063	35.9654	36.5678	36.377	36.7396	29.324
5	0	2002-03-22	0.08	9.63382	8.91261	8.45463	8.37535	8.62612	9.16945	9.84468	10.7381
5	0	2002-06-10	1	18.5482	19.4627	19.7772	17.5541	16.5047	16.1189	16.9473	20.9431
5	0	2002-09-03	0.112	8.86075	9.50643	10.3383	11.3783	12.6064	13.8435	16.7346	15.2935
5	0	2002-11-26	0.952	16.3075	19.6193	23.7811	28.2932	28.7862	26.5545	24.189	25.1876
5	0	2003-03-13	0.488	38.9317	41.6604	39.6056	39.9523	37.7151	37.2803	31.359	30.2289
6	0	2001-11-14	0.304	42.5284	25.3117	19.2163	16.324	14.8244	13.8996	12.8611	13.9295
6	0	2002-03-11	0.464	7.60067	7.93743	8.58594	9.50316	10.0033	9.94901	10.6502	12.7938
6	0	2002-06-11	0.368	16.8157	17.6367	18.6273	16.6578	15.7519	15.4553	16.3603	20.7271
6	0	2002-09-24	0.456	19.3601	22.4736	26.4847	24.1217	21.0363	19.1686	17.4913	18.365
6	0	2002-11-11	0.376	42.7517	37.1769	30.0999	26.7081	25.2604	25.2043	26.4665	25.4008
6	0	2003-03-14	0.48	37.597	41.358	40.0838	40.4409	38.7099	37.8668	32.1628	30.5064
7	0	2001-12-20	0.74	32.0797	36.0188	37.5832	36.867	36.2567	37.0174	34.7495	27.6253
7	0	2001-12-21	0.56	30.4311	34.807	36.9921	35.366	34.7891	35.4253	34.537	27.3518
7	0	2002-03-20	0.12	7.98284	7.1353	7.04948	7.26307	7.79935	8.67093	9.4658	10.9184
7	0	2002-06-09	0.616	18.0097	18.9321	18.3156	16.2544	15.3193	15.0297	16.1765	19.8638
7	0	2002-09-08	0.28	8.73779	8.19	8.41185	8.95975	9.76285	10.7786	13.8026	13.867
7	0	2002-10-11	0.568	26.2904	23.298	22.7279	20.9937	21.1019	22.4045	19.6043	17.5987
7	0	2002-12-09	0.864	8.64853	9.38159	10.4206	12.2803	14.9342	18.362	20.5456	20.0886
7	0	2003-04-10	0.352	30.735	31.7175	34.3223	32.7356	31.1083	31.3981	34.2673	34.389
8	0	2002-01-15	0.173333	36.2059	39.5994	43.819	46.1625	43.508	43.3424	46.2489	47.6486
8	0	2002-01-17	0	41.0291	41.5732	43.0369	46.7746	45.4828	44.2783	46.7058	47.5785
8	0	2002-04-21	0.656	46.5822	46.8777	34.3292	28.0834	24.3946	22.0072	18.2552	16.6764
8	0	2002-07-05	0.288	14.1479	13.331	13.2316	13.2342	13.4187	13.676	14.1918	15.5298
8	0	2002-09-12	0.464	24.7405	17.8686	15.8195	15.1415	15.0831	15.4395	17.5056	18.4366
8	0	2002-11-22	0.21	30.5264	36.1581	42.0729	40.9138	36.4133	32.3607	26.5073	24.3649
8	0	2003-02-22	0.128	40.236	41.0977	40.5531	35.3977	33.1787	31.9631	36.0303	34.8566
8	0	2003-04-19	0.584	23.5191	25.0592	27.4304	29.5932	32.0432	32.0286	36.8953	39.8598
9	0	2002-01-22	0.704	25.6271	29.7047	32.4742	35.604	38.8599	38.1525	40.2805	42.1724
9	0	2002-04-28	0.8	31.1873	34.6055	37.3885	32.3328	27.6499	24.6093	20.0842	17.5914
9	0	2002-07-16	0	12.0806	12.5544	13.0384	13.1285	13.2574	13.3284	14.1357	14.4866
9	0	2002-09-10	0.144	24.328	17.589	15.6932	15.1631	15.2634	15.8073	18.0281	18.2401
9	0	2002-12-01	0.664	16.2181	18.7405	22.255	26.7075	31.608	31.985	27.1418	26.5983
9	0	2003-06-06	0.928	16.2503	17.0767	17.9955	18.9619	19.4302	19.5779	20.1015	22.3661
9	1	2002-02-06	0.952	16.195	16.7557	17.4952	19.3226	21.953	24.3158	30.4328	33.9012
9	1	2002-05-11	0.68	21.4861	23.2822	23.6479	26.843	30.3064	32.0889	24.5193	21.1624
9	1	2002-08-11	0.424	20.0008	20.3704	21.0376	22.0147	20.9686	19.438	17.3688	16.5176
9	1	2002-10-22	0.16	18.1208	19.886	22.637	22.4523	22.9557	22.1999	24.4567	21.2018
9	1	2003-01-25	0.424	26.8055	32.5619	39.1747	36.0909	34.4048	33.8288	33.4138	29.1219
9	1	2003-07-08	0.96	41.4468	41.7288	36.3093	31.3628	28.6559	26.7307	23.5297	22.8611
10	0	2002-01-23	0.216	26.1814	31.7559	32.9147	34.9006	38.051	38.6064	39.5216	40.9413
10	0	2002-04-22	0.824	35.1886	36.5342	28.5932	23.6354	20.7236	18.8565	16.0235	14.6886
10	0	2002-07-08	0	12.4658	12.3002	11.8756	11.7418	11.7375	11.8635	12.2056	12.9576
10	0	2002-09-16	0.624	23.6224	22.6854	18.5278	16.647	15.7906	15.5009	16.5053	17.9106
10	0	2002-11-02	0.456	18.3708	14.8066	14.0027	13.8859	14.396	14.8569	15.7329	16.8284
10	0	2003-01-06	0.384	29.2648	28.7649	31.682	34.6762	33.9834	32.8196	27.4325	30.1644
10	0	2003-02-21	0.344	35.8925	39.5958	37.2721	32.4002	30.6982	29.3732	32.6142	31.9048
10	0	2003-04-18	0.576	24.5633	26.4351	28.8298	31.148	33.3445	33.1226	38.5182	40.8575
10	1	2002-02-19	0.47	13.4868	12.9901	13.1644	13.6478	14.4937	15.8724	22.4482	27.4249
10	1	2002-03-04	0.68	10.6667	11.4847	12.5555	12.549	12.7575	13.1046	15.7335	21.1844
10	1	2002-05-14	0.456	20.0634	21.7043	21.7769	24.7414	28.08	31.6628	26.3828	22.1922
10	1	2002-08-15	0.488	18.3482	19.6857	20.5797	21.6517	22.8979	21.7297	18.4752	16.8798
11	0	2002-01-22	0.552	24.8145	28.9603	31.2949	33.8003	37.3932	36.9337	38.5934	40.3872
11	0	2002-04-26	0.096	17.5902	19.0868	18.306	15.6071	14.0124	12.9929	11.5622	10.7732
11	0	2002-07-15	0	10.9284	11.4289	11.9001	11.5977	11.5309	11.4817	11.9698	12.261
11	0	2002-09-28	0.024	16.1755	15.644	16.6124	18.3576	16.7228	15.5771	14.6813	15.7508
11	0	2002-11-13	0.256	45.8455	44.2159	37.1407	31.1947	28.2251	26.3295	25.3197	23.3319
11	0	2003-01-07	0.573333	24.7131	26.3703	29.7735	34.0918	31.5812	30.2314	25.0497	27.5381
11	0	2003-06-11	0.616	16.5629	17.045	17.9153	18.9752	20.1384	20.7258	19.6986	20.0466
11	1	2002-05-15	0.032	19.4817	20.8157	20.5694	22.9634	25.6221	28.4965	24.9476	21.6192
11	1	2002-08-16	0	16.4185	17.68	18.4151	19.2233	20.2509	19.7077	16.9485	15.4555
11	1	2003-01-26	0.736	23.5655	28.7746	35.4844	34.8876	33.383	32.5101	33.2448	29.0501
11	1	2003-07-12	0.872	33.0581	34.9635	35.098	31.4895	27.9309	25.7318	21.5922	20.3059
12	1	2002-02-25	0.416	31.5369	32.8295	32.5593	33.5513	35.0307	36.8022	43.8256	51.9801
12	1	2002-05-23	0.728	33.2214	34.657	36.2706	38.042	38.1349	40.8037	45.2909	38.8178
12	1	2002-08-25	0.8	22.7043	23.4205	24.2033	24.9659	25.5182	26.0447	25.905	25.3803
12	1	2002-10-24	0.864	23.767	24.4104	25.4984	26.651	27.7569	28.3126	31.0991	29.1059
12	1	2003-01-27	0.832	47.007	51.7474	58.2007	58.2726	54.5442	51.5351	46.7917	42.1105
12	1	2003-06-22	0.904	31.1703	31.8643	31.7738	31.5507	31.7756	32.2414	33.8174	35
13	0	2001-12-26	0.76	37.2611	42.7488	48.4732	51.4764	52.0731	53.0088	53.1332	44.1934
13	0	2001-12-28	0.56	43.6447	43.4986	47.8336	50.9393	52.0603	53.1902	53.728	45.7018
13	0	2002-03-26	0.112	12.5855	12.9757	12.9416	12.8489	12.8144	12.9513	13.841	15.5197
13	0	2002-06-16	0	14.6464	14.9339	15.2095	15.0412	14.9007	14.9411	15.804	17.8217
13	0	2002-09-26	0.008	18.8077	20.4766	22.3702	23.025	21.2422	20.2135	19.7487	20.977
13	0	2002-11-12	0.248	59.8907	52.6596	43.3977	37.8025	34.9816	33.4179	32.9845	30.258
13	0	2003-01-18	0.064	53.5819	54.6284	45.7252	42.5871	42.2236	43.8223	38.4155	35.2437
13	0	2003-04-27	0.744	24.1662	25.8074	26.6723	28.3317	30.3793	32.5159	35.4383	40.7065
14	0	2001-12-29	0.08	46.8863	43.4037	46.3483	49.3114	50.9574	52.1291	53.0205	45.8964
14	0	2001-12-30	0.34	55.2283	49.4433	51.5312	54.8706	57.0512	58.0016	58.6046	51.4316
14	0	2002-03-28	0	12.9042	13.4661	13.6655	13.5329	13.3064	13.3237	14.2527	16.3537
14	0	2002-06-17	0	13.3237	13.7285	14.1045	14.1952	13.9777	13.9058	14.7446	16.8159
14	0	2002-09-14	0.24	40.5494	31.7244	26.6664	24.4943	23.6038	23.4381	24.9224	25.8411
14	0	2002-10-17	0.36	27.6671	31.3715	30.1579	30.421	29.0853	29.1803	29.5799	26.4233
14	0	2002-12-12	0.44	25.7208	23.7153	24.2023	25.8261	28.6334	32.5607	37.5356	34.8695
15	0	2002-01-28	0.928	21.4517	23.6157	27.9435	28.1235	30.5817	33.7201	34.5104	37.2119
15	0	2002-05-01	1	26.4425	33.1629	38.3717	41.473	34.8598	30.478	23.4759	20.1374
15	0	2002-07-23	0.312	13.9671	12.3569	11.9805	11.9788	12.0831	12.2301	12.9747	13.8248
15	0	2002-09-29	0.816	19.1811	20.1564	22.3626	25.4351	23.7673	21.3757	17.9224	17.0092
15	0	2003-01-09	0.92	21.4401	23.346	24.2826	26.5818	26.0887	24.739	21.4163	23.8399
15	0	2003-06-07	0.816	14.3945	15.0675	15.7951	16.5975	17.2118	17.2731	17.1927	18.75
15	1	2002-02-09	0.864	15.9357	16.9452	18.0297	18.8665	21.0797	22.8892	29.6163	31.8356
15	1	2002-05-13	0.112	21.635	23.4383	23.6443	26.8959	30.5312	34.0544	27.0472	22.9343
15	1	2002-08-14	0.32	16.3231	17.1469	17.4857	18.1141	18.5403	17.4721	15.7877	15.2413
15	1	2002-11-08	0.944	41.0299	31.44	25.6163	23.4377	22.4282	22.7011	22.4242	23.868
15	1	2003-01-28	0.528	23.6034	26.8223	32.3693	35.7666	33.2758	32.1183	31.7449	27.8692
15	1	2003-07-06	0.912	40.5596	37.7072	31.2652	27.5662	25.6001	23.8617	21.6126	21.2252
16	0	2001-12-28	0.34	35.5125	34.8344	38.6322	41.3227	42.5104	43.6804	44.5365	38.1353
16	0	2001-12-29	0.24	40.4915	36.3766	38.8528	41.4734	42.9395	44.02	45.1534	39.2137
16	0	2002-03-25	0.072	9.96092	10.435	10.2306	9.99509	9.90364	10.0049	10.8441	12.5647
16	0	2002-06-15	0	11.0001	11.2431	11.3702	11.1849	11.0952	11.1584	12.0199	13.7942
16	0	2002-09-23	0.16	19.2037	21.5367	24.5423	21.2462	19.2113	18.0618	17.5639	18.8829
16	0	2003-01-19	0.216	40.3955	46.5502	37.7533	34.7137	34.1299	35.3653	31.5204	28.1771
16	0	2003-04-28	0.44	19.6652	21.2348	22.1378	23.5546	25.5381	27.4881	30.0485	34.58
17	0	2001-12-29	0.2	50.8599	48.2689	51.7277	55.0784	56.9243	58.191	58.8149	50.7306
17	0	2002-03-28	0	11.0639	11.597	11.7447	11.5585	11.3552	11.3691	12.117	13.5508
17	0	2002-06-17	0	14.8972	15.2767	15.6268	15.6607	15.4826	15.4548	16.3279	18.2349
17	0	2002-09-14	0.14	32.4074	25.6871	21.5204	19.7432	19.0396	18.9583	20.3999	21.3413
17	0	2002-10-17	0.133333	25.2167	29.0325	28.308	28.9232	26.7129	25.9606	25.1197	22.3787
17	0	2002-12-12	0.4	22.7496	19.5993	19.4966	20.6316	22.9357	26.3646	31.1879	29.0627
17	0	2003-04-26	0.904	24.8459	26.4782	27.6209	29.755	31.9527	34.4086	35.9027	40.1492
18	0	2001-12-21	0.6	36.2834	41.4477	43.4955	42.5508	42.5798	43.1191	38.7789	31.1235
18	0	2002-03-21	0.144	10.5338	9.82052	9.50909	9.453	9.7221	10.2643	11.0169	12.4799
18	0	2002-06-08	0.184	13.3273	13.2771	13.0292	13.0227	13.3512	13.9322	16.5734	20.6037
18	0	2002-10-09	0.424	22.0201	21.7878	20.8244	20.3371	21.0865	22.8058	19.2699	18.1042
18	0	2003-01-04	0.808	26.8849	29.039	33.0849	32.5931	31.2513	28.411	24.438	28.1162
18	0	2003-03-12	0.52	48.8222	49.8107	48.0656	48.1874	45.1318	45.0374	37.2727	36.7349
18	1	2002-02-08	0.808	14.0745	14.8357	15.8795	17.3779	20.1536	22.0516	28.6819	30.9903
18	1	2002-05-12	0.56	19.0109	20.6731	20.9898	23.9337	27.2225	29.9994	23.2404	19.826
18	1	2002-08-12	0.44	18.6213	19.3487	20.0691	21.1069	20.8541	19.1415	16.6766	15.4362
18	1	2002-11-03	0.336	21.0765	15.7395	14.5304	14.1474	14.5869	15.0532	15.7768	17.0766
18	1	2002-12-18	0.808	17.3342	18.2311	16.0698	15.52	15.9108	17.3002	24.5218	22.5526
18	1	2003-07-05	0.592	37.5205	33.3402	27.2496	24.0489	22.3262	20.693	18.7841	18.3005
19	0	2002-02-04	0.464	13.3686	14.4079	14.6086	16.4691	17.9211	19.7295	25.0184	28.3464
19	0	2002-05-06	0.664	19.6755	19.7737	23.4113	27.1713	28.5522	25.1519	20.3661	17.16
19	0	2002-08-03	0.752	17.5267	18.7339	18.5886	16.8724	16.0703	15.8874	16.8798	18.2627
19	0	2002-10-13	0.744	12.3662	12.3642	12.7617	13.3298	14.6753	16.7117	16.8596	15.0848
19	0	2003-06-18	0.944	15.4843	14.619	13.5446	13.351	13.5542	14.0202	14.0946	14.4777
20	0	2001-11-27	0.536	56.8408	55.8246	51.6133	47.2845	40.061	35.3627	28.1537	25.0174
20	0	2002-03-13	0.04	11.9601	12.0438	12.4441	13.074	13.8673	13.9527	15.2678	18.6562
20	0	2002-03-15	0	12.1866	12.1108	12.2844	12.7433	13.4334	13.7744	15.0647	18.6674
20	0	2002-06-12	0	17.1884	17.6606	17.8971	17.4106	17.1864	17.2973	18.4392	22.2633
20	0	2002-09-13	0.128	38.7814	27.006	22.6217	20.7994	20.1003	20.0548	21.5049	22.1431
20	0	2002-11-18	0.376	45.357	51.7713	51.5876	46.0114	40.9189	38.2379	35.8094	33.6737
20	0	2003-03-10	0.28	64.4032	60.6117	60.019	58.0902	56.0291	55.4472	45.0713	45.3653
21	0	2001-12-14	0.72	52.9966	52.3891	51.9646	50.1369	49.6822	49.8465	41.906	34.9433
21	0	2002-03-16	0.96	14.2689	13.292	12.5138	12.3879	12.663	13.2665	15.0711	17.4005
21	0	2002-03-19	0.773333	13.3419	12.8876	12.4314	12.5477	13.0721	13.9663	15.9671	18.1767
21	0	2002-06-14	0.208	21.9922	22.958	23.5758	23.0366	21.5694	20.882	20.8734	24.9828
21	0	2002-09-22	0.792	32.3278	36.8784	40.0955	33.1117	29.0672	26.6381	24.2575	25.0704
21	0	2002-10-18	0.88	16.2561	17.858	18.643	19.4735	20.2275	21.6596	25.1292	22.3008
21	0	2002-12-06	0.968	16.0149	17.3027	19.4775	22.6593	26.8505	31.593	29.4379	28.1081
21	0	2003-04-09	0.336	42.1144	43.7895	47.1573	44.249	42.862	43.5659	46.7865	46.1413
22	0	2002-01-03	0.432	64.1176	59.0183	55.6349	56.0004	57.6421	57.797	56.9129	53.9149
22	0	2002-03-30	0.976	17.4013	15.9019	15.332	15.0126	15.0195	15.324	17.5279	19.0675
22	0	2002-06-19	0.816	31.0505	32.9305	34.6287	36.0179	35.4854	32.9618	30.4782	32.1252
22	0	2002-10-03	0.864	26.6287	25.3777	26.1445	28.0272	30.8425	28.181	24.4583	24.4198
22	0	2002-11-21	0.976	41.8645	48.3434	54.7744	50.3566	44.3395	40.3249	34.6841	32.6325
22	0	2003-04-13	0.768	44.9126	48.9546	51.6502	55.141	51.9297	51.3039	54.9918	55.1411
22	1	2002-02-26	0.88	20.905	22.7838	21.0031	20.7355	21.0556	21.9054	26.0565	33.0102
22	1	2002-05-24	0.42	21.1232	22.3188	23.726	25.3252	27.181	29.4545	34.2835	30.0459
22	1	2002-08-26	0	17.3588	18.4104	19.6894	20.9733	21.4844	21.961	22.5398	23.354
23	0	2002-01-11	0.304	49.6991	56.2166	57.8818	54.5614	54.3102	56.4988	59.2064	60.4314
23	0	2002-04-09	0	17.8625	18.1365	18.4445	18.7195	19.0645	19.1504	20.3329	22.1508
23	0	2002-04-17	0.89	45.6174	31.8084	25.6046	22.607	20.9209	19.9598	18.2214	18.4707
23	0	2002-06-26	0.08	23.5657	24.1063	25.0351	26.0623	27.0995	28.2479	25.6731	25.7521
23	0	2003-01-03	0.728	36.8166	40.4131	45.3448	41.0453	37.6969	34.6047	32.0506	36.7195
23	0	2003-04-23	0.984	33.178	34.3887	36.6481	39.6193	42.5738	45.3297	47.1521	51.5746
23	1	2002-02-21	0.696	24.7793	22.9232	23.3476	24.4106	25.5804	26.8818	33.9465	40.6004
23	1	2002-05-20	0.536	24.8574	26.3819	28.1104	28.1898	30.9877	34.1601	35.9511	30.3101
23	1	2002-08-22	0.248	18.528	19.6169	20.68	21.621	22.415	23.2451	21.5749	20.2269
23	1	2002-10-10	0.224	21.4325	21.8441	22.1569	22.6082	23.8229	25.5683	22.9948	21.5061
23	1	2002-10-27	0.776	15.7573	16.2566	16.98	18.0018	19.1325	20.2611	21.9594	21.5793
23	1	2002-11-10	0.488	58.3721	44.6685	35.1824	30.7914	28.3399	27.1276	26.056	26.439
23	1	2002-11-28	0.608	24.0745	27.291	31.0682	35.2392	36.34	34.0657	27.7041	25.4827
23	1	2003-07-04	0.6	41.2662	36.546	31.503	29.2619	28.0004	26.757	25.6271	25.5506
24	0	2002-01-10	0.448	59.7124	65.1728	65.4752	61.7568	61.6378	63.5707	64.4525	63.2576
24	0	2002-04-08	0.184	16.7732	17.0521	17.3743	17.8179	18.1807	18.1728	19.1257	20.5865
24	0	2002-06-25	0.072	26.15	26.1264	26.7758	27.5216	28.2563	28.6837	28.0861	29.522
24	0	2002-09-20	0.592	35.7492	39.3239	36.9717	31.9754	29.2257	27.6973	26.7414	27.5004
24	0	2002-11-09	0.636	58.6767	47.5721	39.9735	37.4522	36.3032	36.8363	36.9136	36.7577
24	0	2002-12-08	0.568	24.8257	26.5737	28.9185	32.2559	36.3612	40.985	40.2579	39.0612
24	0	2003-04-25	0.776	35.8416	37.5629	39.3961	42.221	44.4844	47.2281	48.9171	53.8023
24	1	2002-02-06	0.712	30.1447	31.5838	33.1143	36.0624	39.742	42.2653	49.5542	53.7838
24	1	2002-05-10	0.653333	34.911	32.8507	36.6795	40.2771	43.8294	44.1034	35.0674	31.0309
24	1	2002-08-10	0.8	23.9487	23.7724	24.0918	24.5815	23.8148	23.2073	22.7459	23.0481
24	1	2002-10-21	0.288	23.5473	25.4477	27.2047	27.3552	27.6844	27.5622	30.0485	26.8153
24	1	2002-11-04	0.416	33.3943	27.5661	26.7426	26.5791	27.4759	28.3319	28.9162	30.5913
24	1	2002-12-30	0.696	41.629	45.5608	43.1778	40.4468	37.42	35.4853	36.086	39.9718
24	1	2003-06-25	0.76	27.2008	27.1225	27.5038	26.9453	26.8989	27.1511	28.5662	29.3011
25	0	2002-01-24	0.896	42.9442	48.5994	51.0254	55.6002	60.7105	60.977	64.2707	67.0998
25	0	2002-04-29	0.992	45.0009	48.2316	51.3624	47.5743	41.4125	37.3839	31.1735	28.2721
25	0	2002-07-17	0.128	22.4917	23.0011	23.5504	24.0593	24.5585	25.0597	26.9982	27.9369
25	0	2002-09-19	0.744	37.1644	40.237	35.8534	32.1178	30.1937	29.2393	29.2613	30.175
25	0	2002-10-30	0.52	27.1093	29.3884	31.4385	34.3277	36.4303	37.211	36.4672	35.2203
25	0	2002-12-13	0.968	29.7974	28.0056	28.5531	30.0315	32.5044	35.7349	40.6086	38.6168
25	0	2003-02-17	0.48	69.3465	68.6675	58.3164	54.2101	52.3239	52.5137	54.6262	52.4619
25	0	2003-06-09	0.88	28.3899	29.2428	30.1513	31.1914	32.2325	32.5971	34.0994	37.3593
25	1	2002-02-18	0.84	30.4363	31.0562	32.7864	34.4943	36.335	38.3738	46.4224	51.6979
25	1	2002-03-04	0.56	23.983	25.6366	27.6074	27.8916	28.6515	30.0178	34.836	41.8388
25	1	2002-05-18	0.776	35.8771	37.807	39.925	39.8844	43.2603	46.9146	45.1044	38.4465
25	1	2002-08-20	0.16	20.9372	21.5414	22.1135	22.2702	22.5298	22.8623	22.5871	23.0421
25	1	2002-12-04	0.56	27.1419	28.9963	31.6593	34.8481	38.3247	40.406	34.9217	32.5649
25	1	2003-07-13	0.944	40.9812	42.3505	42.6717	40.27	37.6491	36.1086	33.2993	32.9278
26	0	2002-01-29	0.784	20.4223	20.2871	23.0325	25.1602	27.959	31.0601	32.9036	36.1634
26	0	2002-05-08	0.248	13.647	13.0479	14.7602	16.4613	17.8466	16.449	13.6858	12.6394
26	0	2002-08-08	0.04	20.9076	21.7964	23.0468	22.8543	20.4315	18.7998	16.3101	14.7538
26	0	2002-10-01	0	22.1886	20.0136	21.0771	23.2932	24.0375	21.6177	18.4359	18.6227
26	0	2003-01-20	0.504	34.9147	41.9035	35.8451	32.4978	31.4233	32.1646	29.2452	25.8371
26	0	2003-06-08	0.632	19.8516	21.1582	22.597	24.2419	25.935	25.591	22.9085	22.9582
27	0	2001-12-10	0.76	52.5795	51.1534	50.644	51.0649	51.0934	51.1132	38.8542	32.7477
27	0	2001-12-11	0.92	53.1795	50.7531	51.1062	50.8272	51.3557	51.0721	39.8266	33.4418
27	0	2002-03-17	0.0666667	12.8588	12.3995	12.0383	12.2131	12.7285	13.3693	15.99	18.5962
27	0	2002-06-13	0	15.0722	15.5063	15.5566	15.1745	14.8538	14.8399	16.0152	19.0627
27	0	2002-09-05	0.008	12.0947	12.6353	13.3903	14.3116	15.4568	16.6881	20.287	19.062
27	0	2002-10-16	0.94	21.9298	23.6013	22.3818	22.2566	22.7031	24.1973	25.8952	22.9317
27	0	2002-12-03	0.92	16.94	18.9167	21.9893	25.9656	30.7409	33.3082	29.0719	26.6724
27	0	2003-03-16	0.61	43.9432	49.2789	50.117	49.9065	49.1118	47.222	41.0175	38.4084
28	0	2001-11-26	0.04	60.2244	57.196	50.3497	44.1733	37.8446	33.6741	27.0234	24.3381
28	0	2002-01-12	0.6	58.4448	65.4174	68.5748	65.4645	64.8377	66.8793	68.5264	69.0038
28	0	2002-06-27	0	22.4494	22.8552	23.3726	23.9189	24.4442	24.6842	25.9654	28.7593
28	0	2002-10-29	0.08	23.0422	24.3082	25.3496	26.9401	28.6306	30.2865	30.3813	29.6881
28	1	2002-04-19	0.12	54.445	44.3836	33.8524	28.6581	25.6124	23.6776	20.7244	20.3445
28	1	2002-06-07	0.68	26.5457	26.215	26.308	26.8187	27.6027	28.6029	31.9514	35.6495
29	0	2002-02-04	0.76	24.5601	25.9523	24.0865	25.1085	26.3131	28.3381	32.513	36.0314
29	0	2002-05-07	0.333333	21.8592	23.7701	26.1737	29.0246	30.397	27.6026	23.5576	20.632
29	0	2002-08-04	0.106667	18.3254	19.2497	19.8603	18.6221	17.8664	17.6455	18.4058	18.8409
29	0	2002-09-06	0	9.98235	10.3244	10.8257	11.4393	12.2171	13.0761	15.1181	15.3564
29	0	2002-11-23	1	26.3613	31.1719	36.7309	37.9316	34.5856	30.9685	25.3789	23.7528
29	0	2003-06-19	0.86	22.9095	22.7919	21.4109	21.232	21.5945	22.3499	23.3315	23.0683
30	0	2002-01-24	0.648	43.828	49.4482	52.1012	56.8854	62.0619	62.3071	65.758	68.7982
30	0	2002-04-30	0.984	46.0335	48.9311	51.8555	50.2979	44.0648	39.9988	33.7853	30.887
30	0	2002-07-18	0.04	26.1494	26.6536	27.272	27.8538	28.4184	28.9934	31.1199	32.0464
30	0	2002-09-30	0.872	39.6723	36.6241	37.2456	38.9231	37.9735	35.3867	32.2836	32.3472
30	0	2002-11-14	0.992	63.6117	62.9594	55.5641	49.197	46.361	45.1567	45.6626	43.589
30	0	2002-12-29	0.952	51.3709	55.8161	49.4901	45.6696	42.3435	40.6813	42.1721	45.5466
30	0	2003-06-14	0.944	33.7187	33.0223	33.4111	34.1122	35.035	36.0192	37.4577	40.4523
30	1	2002-02-18	0.816	33.8251	34.6	36.4943	38.3494	40.3347	42.5256	50.9489	56.3089
30	1	2002-05-17	0.952	40.203	42.1756	44.3873	44.2588	47.7286	51.4163	47.68	40.9589
30	1	2002-08-17	0.008	19.4394	19.9162	20.1301	20.2869	20.5421	20.6418	20.5233	21.0482
30	1	2003-01-29	0.944	47.283	49.1514	54.196	59.2856	54.8936	52.4121	48.2038	43.2672
30	1	2003-07-14	0.944	42.6069	43.9579	44.8836	42.9978	40.2658	38.6523	35.8758	35.5126
31	0	2002-01-31	0.72	16.5826	14.7121	15.9907	17.8937	20.0645	22.6078	25.1267	28.051
31	0	2002-02-03	0.76	17.2576	17.5691	17.1426	18.6445	20.1343	22.9087	26.382	29.8726
31	0	2002-05-05	0.888	15.0292	19.4285	23.0004	26.5458	26.0374	22.6369	17.2359	14.7273
31	0	2002-08-02	0.704	19.7194	21.2022	19.7502	17.3736	16.1713	15.6397	15.6583	16.7157
31	0	2002-09-09	0.304	14.1701	10.7245	9.90143	9.86891	10.2588	10.9579	13.5454	13.9499
31	0	2003-01-22	0.56	23.5035	29.5948	29.8866	26.8848	25.9733	26.7288	24.8782	21.3018
31	0	2003-06-12	0.944	11.4001	11.0637	11.3786	11.9011	12.5588	13.0456	12.8222	14.0784
32	0	2001-12-23	0.624	58.3941	63.409	66.5519	64.8811	62.8249	62.3707	64.0822	52.1554
32	0	2002-01-08	0.584	67.6807	73.0656	70.3204	68.5934	69.3786	71.14	70.7695	72.2734
32	0	2002-03-29	0.896	19.1069	18.0323	17.9667	18.081	18.4139	19.0415	21.8875	24.5626
32	0	2002-04-07	0.2	24.4262	25.8683	26.6454	24.8448	23.9187	23.3324	23.8431	25.7484
32	0	2002-06-18	0.984	37.6273	39.405	40.9848	42.2573	40.6145	38.11	35.6004	36.7625
32	0	2002-06-24	0.28	33.3239	33.4138	34.4521	35.6065	36.6711	36.4464	33.3216	33.4259
32	0	2002-09-27	0.984	28.9746	31.8061	34.8793	36.9198	33.1841	30.8663	28.3533	28.8512
32	0	2002-10-04	0.896	42.5294	39.9129	38.7092	39.8172	42.2433	39.9567	34.5043	34.0896
32	0	2002-11-19	0.904	51.8005	58.1572	60.0386	54.7769	48.7904	45.527	41.6311	40.9612
32	0	2003-01-21	0.64	58.2315	67.0405	61.8544	55.9835	54.0275	54.3073	47.9741	43.3611
32	0	2003-02-18	0.6	62.502	66.4234	60.5248	59.3275	58.8295	57.2666	57.7	54.976
32	0	2003-04-17	0.968	48.8065	52.5639	56.4414	60.06	62.4145	60.5896	64.5186	64.6224
32	0	2003-04-22	0.992	48.6101	50.0022	53.1629	56.4667	59.3566	61.4381	61.8093	65.4083
33	0	2002-01-07	0.696	78.0834	79.8306	74.2835	72.8949	74.7474	76.8397	77.6694	76.1607
33	0	2002-04-06	0.032	20.7604	21.109	21.5306	22.1094	22.2826	22.4226	24.0398	25.9248
33	0	2002-06-23	0.136	32.7516	33.3435	34.2462	35.1301	35.9768	35.6317	34.6876	35.8076
33	0	2002-09-17	0.792	46.3972	47.4299	39.5821	35.7465	33.8764	32.9776	33.038	33.7212
33	0	2002-10-28	0.36	35.5452	37.9299	40.4967	43.9958	44.6958	45.2787	43.5062	41.0942
33	0	2002-11-27	0.688	42.3905	46.8784	52.0122	57.1535	56.8728	53.6277	48.9636	48.949
33	0	2002-12-30	0.672	54.7861	59.363	55.1552	50.4972	46.7632	44.5684	45.2606	49.5376
33	0	2003-04-22	0.992	57.6677	59.2893	62.3928	65.7956	69.0416	70.7343	72.9653	77.2367
33	1	2002-02-19	0.664	33.77	34.0816	35.3939	37.064	39.1336	41.4886	51.2417	58.3644
33	1	2002-05-21	0.04	34.8567	36.2228	37.7195	39.3806	39.405	41.9087	43.464	38.2161
33	1	2002-08-23	0	25.0154	26.0747	27.1324	27.9626	28.5711	29.265	28.2893	27.465
33	1	2002-10-23	0	28.8319	29.8837	31.5266	32.2322	32.9294	33.0496	35.9233	32.9258
33	1	2003-01-30	0.8	54.4033	56.8885	62.4164	68.8116	65.5998	63.3433	61.1584	55.8995
33	1	2003-07-09	0.464	55.1759	56.1371	52.7168	47.8467	45.2025	43.5187	40.6794	40.4776
34	0	2002-01-06	0.6	88.2039	87.1217	81.6188	80.8914	83.1866	85.1528	85.5522	82.0793
34	0	2002-04-01	0.072	23.1201	23.6232	24.3202	24.4179	24.5033	24.8071	27.1139	29.1804
34	0	2002-06-22	0.104	35.801	36.5724	37.5317	38.4556	39.3943	38.3918	37.0448	37.8457
34	0	2002-09-25	0.336	39.1391	41.8222	44.6569	43.3534	40.064	38.1885	36.9122	37.9942
34	0	2002-11-20	0.752	57.9665	63.5785	67.2354	62.815	56.8847	53.6555	50.7162	49.6416
34	0	2003-04-11	0.584	71.0283	74.2189	77.8384	77.5545	75.1605	75.4789	79.7385	79.5563
34	1	2002-02-16	0.952	31.9707	33.8743	35.7412	37.6714	39.982	43.3111	54.4824	60.5833
34	1	2002-05-19	0.336	35.6208	36.9801	38.4398	40.0566	41.9472	44.0988	42.8759	38.1046
34	1	2002-08-21	0	30.1422	31.5005	32.7383	33.497	34.231	35.0771	32.7908	31.5756
34	1	2003-01-31	0.632	50.8671	52.4917	57.4354	63.9229	62.8364	60.7883	59.3371	54.3072
34	1	2003-07-07	0.768	57.1384	55.7901	50.4351	46.4157	44.3017	42.6832	40.6018	40.7038
35	0	2002-03-01	0.68	15.2613	16.48	16.9305	16.9405	17.2891	17.9063	20.5799	27.5426
35	0	2002-05-29	0.16	20.5179	19.9472	20.3634	21.1462	22.1593	22.395	28.2729	25.5055
35	0	2002-08-28	0.16	18.2278	19.354	20.7175	22.1749	23.4769	24.5773	25.1766	23.4025
35	0	2003-01-23	0.384	37.2627	43.7092	45.9752	41.9678	40.845	41.5904	40.6015	36.4279
35	0	2003-06-16	0.576	26.4235	24.8957	24.6552	25.089	25.8562	26.8037	27.668	29.2533
36	0	2001-11-26	0.01	69.5851	66.492	60.1846	53.2326	45.7592	40.8431	33.0117	29.6745
36	0	2002-01-12	0.57	53.1043	60.7088	65.2192	62.4462	61.5865	63.4294	66.6881	67.108
36	0	2002-06-27	0	16.0489	16.3591	16.7624	17.1959	17.6191	17.768	18.7586	20.914
36	0	2002-10-29	0.0266667	21.0736	22.2961	23.2961	24.86	26.5477	28.2188	28.3265	27.6959
36	0	2003-01-24	0.864	50.7719	58.5437	65.649	58.1386	54.4559	52.1483	47.2379	41.9612
36	0	2003-04-21	0.928	37.0984	39.2254	42.5729	45.6439	49.0834	49.7931	51.4422	53.6394
36	1	2002-03-12	0.176	20.8365	21.6284	22.8176	24.3087	25.7032	26.1858	29.9949	35.5911
36	1	2002-04-19	0.26	58.9829	48.5301	37.775	32.4935	29.4166	27.4841	24.5902	24.4019
36	1	2002-06-07	0.36	21.0615	20.7032	20.7037	21.0885	21.7323	22.5853	25.6728	29.2811
36	1	2002-10-02	0.6	30.1355	29.7103	31.0991	33.0547	34.4714	31.7385	27.5411	26.1946
36	1	2002-11-05	0.184	29.1409	23.9499	22.5685	22.1537	22.2686	22.669	24.2945	27.1686
36	1	2002-12-31	0.68	33.5316	36.393	36.2459	33.8671	32.0993	30.8677	31.6349	34.9014
36	1	2003-04-29	0.944	31.8102	33.426	34.8706	36.6167	38.8917	41.1269	46.3755	53.3374
37	0	2002-01-21	0.776	69.4613	72.4733	73.8873	77.5168	80.0474	79.3316	82.9774	84.0502
37	0	2002-04-25	0.99	54.9947	57.5693	53.2668	46.9323	43.5155	41.6047	37.1751	35.9138
37	0	2002-07-14	0.008	35.1378	36.2206	37.1747	38.1482	39.027	39.6915	42.502	41.2361
37	0	2002-10-05	1	50.1099	48.8914	46.9656	47.5066	49.1304	47.9371	42.4406	41.97
37	0	2002-12-05	0.88	37.9223	40.2143	43.5591	47.5577	52.1822	56.1362	51.1711	49.7103
37	0	2003-06-13	0.88	39.3234	39.0987	39.7497	40.6576	41.736	42.8509	44.7713	48.9251
38	0	2002-01-14	0.776	47.2555	53.2772	59.2581	58.0089	56.1765	57.178	61.1891	61.8048
38	0	2002-04-20	0.448	54.3977	49.1956	37.4362	31.6349	28.2317	26.0578	22.7431	22.1242
38	0	2002-07-04	0	19.7488	20.2334	20.7315	21.3443	22.0646	22.7935	23.6748	24.8318
38	0	2002-10-29	0.528	19.2153	20.6077	22.1196	24.1811	25.6386	26.7651	27.093	26.4351
38	0	2003-01-24	0.744	44.7551	52.4512	59.4198	52.2948	48.7915	46.5513	41.9413	36.9672
38	0	2003-06-17	0.216	22.7009	22.4524	22.3926	22.7431	23.2835	23.9542	25.0582	27.0096
38	1	2002-02-20	0.968	24.7818	23.5848	24.3375	25.6337	27.3006	28.6532	35.8106	41.8709
38	1	2002-05-22	0.312	26.5843	28.1013	29.8057	31.7585	32.3712	35.3765	39.6295	33.2854
38	1	2002-08-24	0.232	16.0609	16.5273	17.0327	17.4802	17.7376	18.0202	18.0166	18.0812
38	1	2002-09-18	0.896	32.1886	35.4372	28.7233	25.1763	23.234	22.0732	20.811	20.5556
38	1	2002-10-26	0.024	17.0522	17.6946	18.6601	19.7475	20.64	21.4225	24.1033	23.095
38	1	2003-02-01	0.696	39.4217	38.5791	41.4713	46.8923	47.8434	45.2353	40.6816	35.6755
38	1	2003-04-20	0.792	32.7754	34.3885	36.8173	39.1592	41.861	43.2357	50.2069	53.106

## Sheet: Green forbs
Calibration data for the relationship between the density of green forb patches (patches/m2) and soil water (mm)
Community	Burnt	Date	Average of green forbs patch density (patches/m2)	Average of previous 5 days soil water (mm)	Average of previous 10 days soil water (mm)	Average of previous 15 days soil water (mm)	Average of previous 20 days soil water (mm)	Average of previous 25 days soil water (mm)	Average of previous 30 days soil water (mm)	Average of previous 45 days soil water (mm)	Average of previous 60 days soil water (mm)
1	0	2002-01-19	0.62	27.9602	30.3361	35.0774	39.1304	39.0023	38.1969	41.7612	43.3145
1	0	2002-01-20	0.813333	26.7678	29.2455	33.2866	37.6373	38.8303	37.6654	41.2774	43.1602
1	0	2002-04-24	0.368	36.061	38.9324	32.8892	27.2953	24.1498	22.2803	18.6428	16.9161
1	0	2002-07-10	0.024	14.1161	14.667	15.005	15.4641	15.4228	15.6623	16.7702	16.4762
1	0	2002-09-07	0	11.216	11.2468	11.7317	12.4347	13.3603	14.4312	17.4278	17.255
1	0	2002-11-24	0.37	25.8056	30.5436	36.0475	39.205	37.1059	33.5805	29.8449	28.7248
1	0	2003-06-05	0.664	21.0288	22.0359	23.2427	24.4543	24.7424	24.832	25.5589	28.5924
2	0	2002-01-25	0.346667	16.8004	19.9827	22.8601	26.7947	30.5531	32.1991	33.7121	36.5718
2	0	2002-01-27	0.72	21.7882	24.0147	27.4434	28.7749	30.6033	33.7571	35.4655	36.4291
2	0	2002-05-03	0.144	18.9805	23.8807	27.6776	30.281	27.0771	23.8828	18.8592	16.5046
2	0	2002-08-01	0.112	22.3972	23.8172	21.4385	19.5478	18.7229	18.4765	19.0301	20.3528
2	0	2002-09-04	0.04	9.93746	10.5258	11.3088	12.2772	13.4384	14.6924	17.8657	16.5037
2	0	2002-11-25	0.152	21.3013	25.3348	30.246	34.8182	34.1336	31.0196	28.3929	28.3808
2	0	2003-07-16	0.304	37.9532	40.3415	42.7922	42.9647	38.2282	34.5928	28.3307	25.9082
3	0	2002-01-04	0.44	41.878	42.4274	39.1733	38.0655	38.955	39.4328	37.8921	36.7137
3	0	2002-03-31	0.16	11.3472	10.4993	9.72374	9.28109	9.11173	9.18899	10.9331	11.8486
3	0	2002-06-20	0.128	22.0463	23.9624	25.7454	27.2965	27.7652	25.1178	22.0836	23.5553
3	0	2002-09-15	0.072	31.219	25.937	19.8281	16.9738	15.5253	14.8465	15.1258	15.9013
3	0	2002-11-29	0.008	13.0851	15.7258	19.1193	23.3846	26.3885	25.681	20.6543	18.651
4	0	2002-01-18	0.29	22.4248	23.1302	26.2786	29.0299	29.147	28.4006	30.5493	31.3687
4	0	2002-01-19	0.04	18.6679	21.348	25.7383	28.3458	27.4313	26.7547	29.7698	31.2926
4	0	2002-04-23	0.064	32.9435	34.703	27.2335	21.9058	18.7964	16.8235	13.6335	12.3726
4	0	2002-07-09	0.088	13.4458	14.2466	15.1058	15.8429	16.0805	16.7183	18.6236	16.7952
4	0	2002-09-02	0.016	9.93144	10.5714	11.3431	12.3092	13.3968	14.4765	17.1943	16.559
4	0	2002-10-25	0.248	16.5941	16.1489	18.1177	19.507	19.5125	19.4412	21.1582	19.0858
4	0	2002-12-28	0.136	35.074	39.0063	30.6069	26.5675	23.5964	21.9387	22.3315	25.0175
4	0	2003-04-16	0.512	21.2917	24.1634	26.2494	28.5091	28.9602	27.7575	30.3419	30.8501
4	1	2002-02-27	0.24	11.1348	13.0431	12.0943	11.9534	12.2875	13.1621	15.1307	18.7715
4	1	2002-05-28	0.28	13.3626	12.0006	12.1224	12.7503	13.6959	14.9638	21.0162	18.4061
4	1	2002-08-27	0	8.39121	9.11925	10.0717	11.0957	11.6441	11.9772	12.5136	13.0073
5	0	2001-12-22	0.1	29.1378	34.1337	36.6875	36.9779	37.4316	37.4285	36.7389	29.3916
5	0	2001-12-23	0.08	27.7372	32.3576	35.3063	35.9654	36.5678	36.377	36.7396	29.324
5	0	2002-03-22	0.144	9.63382	8.91261	8.45463	8.37535	8.62612	9.16945	9.84468	10.7381
5	0	2002-06-10	0.048	18.5482	19.4627	19.7772	17.5541	16.5047	16.1189	16.9473	20.9431
5	0	2002-09-03	0.008	8.86075	9.50643	10.3383	11.3783	12.6064	13.8435	16.7346	15.2935
5	0	2002-11-26	0.072	16.3075	19.6193	23.7811	28.2932	28.7862	26.5545	24.189	25.1876
5	0	2003-03-13	0.184	38.9317	41.6604	39.6056	39.9523	37.7151	37.2803	31.359	30.2289
6	0	2001-11-14	0.536	42.5284	25.3117	19.2163	16.324	14.8244	13.8996	12.8611	13.9295
6	0	2002-03-11	0.784	7.60067	7.93743	8.58594	9.50316	10.0033	9.94901	10.6502	12.7938
6	0	2002-06-11	0.416	16.8157	17.6367	18.6273	16.6578	15.7519	15.4553	16.3603	20.7271
6	0	2002-09-24	0.328	19.3601	22.4736	26.4847	24.1217	21.0363	19.1686	17.4913	18.365
6	0	2002-11-11	0.472	42.7517	37.1769	30.0999	26.7081	25.2604	25.2043	26.4665	25.4008
6	0	2003-03-14	0.696	37.597	41.358	40.0838	40.4409	38.7099	37.8668	32.1628	30.5064
7	0	2001-12-20	0.6	32.0797	36.0188	37.5832	36.867	36.2567	37.0174	34.7495	27.6253
7	0	2001-12-21	0.52	30.4311	34.807	36.9921	35.366	34.7891	35.4253	34.537	27.3518
7	0	2002-03-20	0.368	7.98284	7.1353	7.04948	7.26307	7.79935	8.67093	9.4658	10.9184
7	0	2002-06-09	0.24	18.0097	18.9321	18.3156	16.2544	15.3193	15.0297	16.1765	19.8638
7	0	2002-09-08	0.008	8.73779	8.19	8.41185	8.95975	9.76285	10.7786	13.8026	13.867
7	0	2002-10-11	0.784	26.2904	23.298	22.7279	20.9937	21.1019	22.4045	19.6043	17.5987
7	0	2002-12-09	0.352	8.64853	9.38159	10.4206	12.2803	14.9342	18.362	20.5456	20.0886
7	0	2003-04-10	0.76	30.735	31.7175	34.3223	32.7356	31.1083	31.3981	34.2673	34.389
8	0	2002-01-15	0.48	36.2059	39.5994	43.819	46.1625	43.508	43.3424	46.2489	47.6486
8	0	2002-01-17	0.4	41.0291	41.5732	43.0369	46.7746	45.4828	44.2783	46.7058	47.5785
8	0	2002-04-21	0.12	46.5822	46.8777	34.3292	28.0834	24.3946	22.0072	18.2552	16.6764
8	0	2002-07-05	0.28	14.1479	13.331	13.2316	13.2342	13.4187	13.676	14.1918	15.5298
8	0	2002-09-12	0.136	24.7405	17.8686	15.8195	15.1415	15.0831	15.4395	17.5056	18.4366
8	0	2002-11-22	0.2	30.5264	36.1581	42.0729	40.9138	36.4133	32.3607	26.5073	24.3649
8	0	2003-02-22	0.12	40.236	41.0977	40.5531	35.3977	33.1787	31.9631	36.0303	34.8566
8	0	2003-04-19	0.536	23.5191	25.0592	27.4304	29.5932	32.0432	32.0286	36.8953	39.8598
9	0	2002-01-22	0.4	25.6271	29.7047	32.4742	35.604	38.8599	38.1525	40.2805	42.1724
9	0	2002-04-28	0.12	31.1873	34.6055	37.3885	32.3328	27.6499	24.6093	20.0842	17.5914
9	0	2002-07-16	0	12.0806	12.5544	13.0384	13.1285	13.2574	13.3284	14.1357	14.4866
9	0	2002-09-10	0	24.328	17.589	15.6932	15.1631	15.2634	15.8073	18.0281	18.2401
9	0	2002-12-01	0.112	16.2181	18.7405	22.255	26.7075	31.608	31.985	27.1418	26.5983
9	0	2003-06-06	0.52	16.2503	17.0767	17.9955	18.9619	19.4302	19.5779	20.1015	22.3661
9	1	2002-02-06	0.016	16.195	16.7557	17.4952	19.3226	21.953	24.3158	30.4328	33.9012
9	1	2002-05-11	0.048	21.4861	23.2822	23.6479	26.843	30.3064	32.0889	24.5193	21.1624
9	1	2002-08-11	0.008	20.0008	20.3704	21.0376	22.0147	20.9686	19.438	17.3688	16.5176
9	1	2002-10-22	0.016	18.1208	19.886	22.637	22.4523	22.9557	22.1999	24.4567	21.2018
9	1	2003-01-25	0.064	26.8055	32.5619	39.1747	36.0909	34.4048	33.8288	33.4138	29.1219
9	1	2003-07-08	0.264	41.4468	41.7288	36.3093	31.3628	28.6559	26.7307	23.5297	22.8611
10	0	2002-01-23	0.64	26.1814	31.7559	32.9147	34.9006	38.051	38.6064	39.5216	40.9413
10	0	2002-04-22	0.264	35.1886	36.5342	28.5932	23.6354	20.7236	18.8565	16.0235	14.6886
10	0	2002-07-08	0.056	12.4658	12.3002	11.8756	11.7418	11.7375	11.8635	12.2056	12.9576
10	0	2002-09-16	0.096	23.6224	22.6854	18.5278	16.647	15.7906	15.5009	16.5053	17.9106
10	0	2002-11-02	0.04	18.3708	14.8066	14.0027	13.8859	14.396	14.8569	15.7329	16.8284
10	0	2003-01-06	0.368	29.2648	28.7649	31.682	34.6762	33.9834	32.8196	27.4325	30.1644
10	0	2003-02-21	0.296	35.8925	39.5958	37.2721	32.4002	30.6982	29.3732	32.6142	31.9048
10	0	2003-04-18	0.696	24.5633	26.4351	28.8298	31.148	33.3445	33.1226	38.5182	40.8575
10	1	2002-02-19	0.31	13.4868	12.9901	13.1644	13.6478	14.4937	15.8724	22.4482	27.4249
10	1	2002-03-04	0.12	10.6667	11.4847	12.5555	12.549	12.7575	13.1046	15.7335	21.1844
10	1	2002-05-14	0.416	20.0634	21.7043	21.7769	24.7414	28.08	31.6628	26.3828	22.1922
10	1	2002-08-15	0.12	18.3482	19.6857	20.5797	21.6517	22.8979	21.7297	18.4752	16.8798
11	0	2002-01-22	0.92	24.8145	28.9603	31.2949	33.8003	37.3932	36.9337	38.5934	40.3872
11	0	2002-04-26	0.112	17.5902	19.0868	18.306	15.6071	14.0124	12.9929	11.5622	10.7732
11	0	2002-07-15	0	10.9284	11.4289	11.9001	11.5977	11.5309	11.4817	11.9698	12.261
11	0	2002-09-28	0.008	16.1755	15.644	16.6124	18.3576	16.7228	15.5771	14.6813	15.7508
11	0	2002-11-13	0.352	45.8455	44.2159	37.1407	31.1947	28.2251	26.3295	25.3197	23.3319
11	0	2003-01-07	0.346667	24.7131	26.3703	29.7735	34.0918	31.5812	30.2314	25.0497	27.5381
11	0	2003-06-11	0.496	16.5629	17.045	17.9153	18.9752	20.1384	20.7258	19.6986	20.0466
11	1	2002-05-15	0.016	19.4817	20.8157	20.5694	22.9634	25.6221	28.4965	24.9476	21.6192
11	1	2002-08-16	0.024	16.4185	17.68	18.4151	19.2233	20.2509	19.7077	16.9485	15.4555
11	1	2003-01-26	0.192	23.5655	28.7746	35.4844	34.8876	33.383	32.5101	33.2448	29.0501
11	1	2003-07-12	0.44	33.0581	34.9635	35.098	31.4895	27.9309	25.7318	21.5922	20.3059
12	1	2002-02-25	0.04	31.5369	32.8295	32.5593	33.5513	35.0307	36.8022	43.8256	51.9801
12	1	2002-05-23	0.016	33.2214	34.657	36.2706	38.042	38.1349	40.8037	45.2909	38.8178
12	1	2002-08-25	0	22.7043	23.4205	24.2033	24.9659	25.5182	26.0447	25.905	25.3803
12	1	2002-10-24	0	23.767	24.4104	25.4984	26.651	27.7569	28.3126	31.0991	29.1059
12	1	2003-01-27	0.048	47.007	51.7474	58.2007	58.2726	54.5442	51.5351	46.7917	42.1105
12	1	2003-06-22	0.136	31.1703	31.8643	31.7738	31.5507	31.7756	32.2414	33.8174	35
13	0	2001-12-26	0.693333	37.2611	42.7488	48.4732	51.4764	52.0731	53.0088	53.1332	44.1934
13	0	2001-12-28	0.76	43.6447	43.4986	47.8336	50.9393	52.0603	53.1902	53.728	45.7018
13	0	2002-03-26	0.136	12.5855	12.9757	12.9416	12.8489	12.8144	12.9513	13.841	15.5197
13	0	2002-06-16	0.088	14.6464	14.9339	15.2095	15.0412	14.9007	14.9411	15.804	17.8217
13	0	2002-09-26	0.16	18.8077	20.4766	22.3702	23.025	21.2422	20.2135	19.7487	20.977
13	0	2002-11-12	0.312	59.8907	52.6596	43.3977	37.8025	34.9816	33.4179	32.9845	30.258
13	0	2003-01-18	0.512	53.5819	54.6284	45.7252	42.5871	42.2236	43.8223	38.4155	35.2437
13	0	2003-04-27	0.68	24.1662	25.8074	26.6723	28.3317	30.3793	32.5159	35.4383	40.7065
14	0	2001-12-29	0.8	46.8863	43.4037	46.3483	49.3114	50.9574	52.1291	53.0205	45.8964
14	0	2001-12-30	0.86	55.2283	49.4433	51.5312	54.8706	57.0512	58.0016	58.6046	51.4316
14	0	2002-03-28	0.2	12.9042	13.4661	13.6655	13.5329	13.3064	13.3237	14.2527	16.3537
14	0	2002-06-17	0	13.3237	13.7285	14.1045	14.1952	13.9777	13.9058	14.7446	16.8159
14	0	2002-09-14	0	40.5494	31.7244	26.6664	24.4943	23.6038	23.4381	24.9224	25.8411
14	0	2002-10-17	0.7	27.6671	31.3715	30.1579	30.421	29.0853	29.1803	29.5799	26.4233
14	0	2002-12-12	0.32	25.7208	23.7153	24.2023	25.8261	28.6334	32.5607	37.5356	34.8695
15	0	2002-01-28	0.152	21.4517	23.6157	27.9435	28.1235	30.5817	33.7201	34.5104	37.2119
15	0	2002-05-01	0.184	26.4425	33.1629	38.3717	41.473	34.8598	30.478	23.4759	20.1374
15	0	2002-07-23	0.08	13.9671	12.3569	11.9805	11.9788	12.0831	12.2301	12.9747	13.8248
15	0	2002-09-29	0.16	19.1811	20.1564	22.3626	25.4351	23.7673	21.3757	17.9224	17.0092
15	0	2003-01-09	0.4	21.4401	23.346	24.2826	26.5818	26.0887	24.739	21.4163	23.8399
15	0	2003-06-07	0.632	14.3945	15.0675	15.7951	16.5975	17.2118	17.2731	17.1927	18.75
15	1	2002-02-09	0.112	15.9357	16.9452	18.0297	18.8665	21.0797	22.8892	29.6163	31.8356
15	1	2002-05-13	0.168	21.635	23.4383	23.6443	26.8959	30.5312	34.0544	27.0472	22.9343
15	1	2002-08-14	0	16.3231	17.1469	17.4857	18.1141	18.5403	17.4721	15.7877	15.2413
15	1	2002-11-08	0	41.0299	31.44	25.6163	23.4377	22.4282	22.7011	22.4242	23.868
15	1	2003-01-28	0	23.6034	26.8223	32.3693	35.7666	33.2758	32.1183	31.7449	27.8692
15	1	2003-07-06	0	40.5596	37.7072	31.2652	27.5662	25.6001	23.8617	21.6126	21.2252
16	0	2001-12-28	0.62	35.5125	34.8344	38.6322	41.3227	42.5104	43.6804	44.5365	38.1353
16	0	2001-12-29	0.64	40.4915	36.3766	38.8528	41.4734	42.9395	44.02	45.1534	39.2137
16	0	2002-03-25	0.208	9.96092	10.435	10.2306	9.99509	9.90364	10.0049	10.8441	12.5647
16	0	2002-06-15	0	11.0001	11.2431	11.3702	11.1849	11.0952	11.1584	12.0199	13.7942
16	0	2002-09-23	0.032	19.2037	21.5367	24.5423	21.2462	19.2113	18.0618	17.5639	18.8829
16	0	2003-01-19	0.256	40.3955	46.5502	37.7533	34.7137	34.1299	35.3653	31.5204	28.1771
16	0	2003-04-28	0.56	19.6652	21.2348	22.1378	23.5546	25.5381	27.4881	30.0485	34.58
17	0	2001-12-29	0.64	50.8599	48.2689	51.7277	55.0784	56.9243	58.191	58.8149	50.7306
17	0	2002-03-28	0.293333	11.0639	11.597	11.7447	11.5585	11.3552	11.3691	12.117	13.5508
17	0	2002-06-17	0	14.8972	15.2767	15.6268	15.6607	15.4826	15.4548	16.3279	18.2349
17	0	2002-09-14	0	32.4074	25.6871	21.5204	19.7432	19.0396	18.9583	20.3999	21.3413
17	0	2002-10-17	0.453333	25.2167	29.0325	28.308	28.9232	26.7129	25.9606	25.1197	22.3787
17	0	2002-12-12	0.5	22.7496	19.5993	19.4966	20.6316	22.9357	26.3646	31.1879	29.0627
17	0	2003-04-26	0.496	24.8459	26.4782	27.6209	29.755	31.9527	34.4086	35.9027	40.1492
18	0	2001-12-21	0.144	36.2834	41.4477	43.4955	42.5508	42.5798	43.1191	38.7789	31.1235
18	0	2002-03-21	0.248	10.5338	9.82052	9.50909	9.453	9.7221	10.2643	11.0169	12.4799
18	0	2002-06-08	0.016	13.3273	13.2771	13.0292	13.0227	13.3512	13.9322	16.5734	20.6037
18	0	2002-10-09	0	22.0201	21.7878	20.8244	20.3371	21.0865	22.8058	19.2699	18.1042
18	0	2003-01-04	0.264	26.8849	29.039	33.0849	32.5931	31.2513	28.411	24.438	28.1162
18	0	2003-03-12	0.216	48.8222	49.8107	48.0656	48.1874	45.1318	45.0374	37.2727	36.7349
18	1	2002-02-08	0.136	14.0745	14.8357	15.8795	17.3779	20.1536	22.0516	28.6819	30.9903
18	1	2002-05-12	0.032	19.0109	20.6731	20.9898	23.9337	27.2225	29.9994	23.2404	19.826
18	1	2002-08-12	0	18.6213	19.3487	20.0691	21.1069	20.8541	19.1415	16.6766	15.4362
18	1	2002-11-03	0	21.0765	15.7395	14.5304	14.1474	14.5869	15.0532	15.7768	17.0766
18	1	2002-12-18	0.04	17.3342	18.2311	16.0698	15.52	15.9108	17.3002	24.5218	22.5526
18	1	2003-07-05	0.336	37.5205	33.3402	27.2496	24.0489	22.3262	20.693	18.7841	18.3005
19	0	2002-02-04	0.416	13.3686	14.4079	14.6086	16.4691	17.9211	19.7295	25.0184	28.3464
19	0	2002-05-06	0.088	19.6755	19.7737	23.4113	27.1713	28.5522	25.1519	20.3661	17.16
19	0	2002-08-03	0.064	17.5267	18.7339	18.5886	16.8724	16.0703	15.8874	16.8798	18.2627
19	0	2002-10-13	0.32	12.3662	12.3642	12.7617	13.3298	14.6753	16.7117	16.8596	15.0848
19	0	2003-06-18	0.312	15.4843	14.619	13.5446	13.351	13.5542	14.0202	14.0946	14.4777
20	0	2001-11-27	0.656	56.8408	55.8246	51.6133	47.2845	40.061	35.3627	28.1537	25.0174
20	0	2002-03-13	0.48	11.9601	12.0438	12.4441	13.074	13.8673	13.9527	15.2678	18.6562
20	0	2002-03-15	0.32	12.1866	12.1108	12.2844	12.7433	13.4334	13.7744	15.0647	18.6674
20	0	2002-06-12	0.008	17.1884	17.6606	17.8971	17.4106	17.1864	17.2973	18.4392	22.2633
20	0	2002-09-13	0	38.7814	27.006	22.6217	20.7994	20.1003	20.0548	21.5049	22.1431
20	0	2002-11-18	0.52	45.357	51.7713	51.5876	46.0114	40.9189	38.2379	35.8094	33.6737
20	0	2003-03-10	0.664	64.4032	60.6117	60.019	58.0902	56.0291	55.4472	45.0713	45.3653
21	0	2001-12-14	0.466667	52.9966	52.3891	51.9646	50.1369	49.6822	49.8465	41.906	34.9433
21	0	2002-03-16	0	14.2689	13.292	12.5138	12.3879	12.663	13.2665	15.0711	17.4005
21	0	2002-03-19	0.266667	13.3419	12.8876	12.4314	12.5477	13.0721	13.9663	15.9671	18.1767
21	0	2002-06-14	0.408	21.9922	22.958	23.5758	23.0366	21.5694	20.882	20.8734	24.9828
21	0	2002-09-22	0.152	32.3278	36.8784	40.0955	33.1117	29.0672	26.6381	24.2575	25.0704
21	0	2002-10-18	0.168	16.2561	17.858	18.643	19.4735	20.2275	21.6596	25.1292	22.3008
21	0	2002-12-06	0.112	16.0149	17.3027	19.4775	22.6593	26.8505	31.593	29.4379	28.1081
21	0	2003-04-09	0.72	42.1144	43.7895	47.1573	44.249	42.862	43.5659	46.7865	46.1413
22	0	2002-01-03	0.048	64.1176	59.0183	55.6349	56.0004	57.6421	57.797	56.9129	53.9149
22	0	2002-03-30	0.024	17.4013	15.9019	15.332	15.0126	15.0195	15.324	17.5279	19.0675
22	0	2002-06-19	0.024	31.0505	32.9305	34.6287	36.0179	35.4854	32.9618	30.4782	32.1252
22	0	2002-10-03	0.04	26.6287	25.3777	26.1445	28.0272	30.8425	28.181	24.4583	24.4198
22	0	2002-11-21	0.144	41.8645	48.3434	54.7744	50.3566	44.3395	40.3249	34.6841	32.6325
22	0	2003-04-13	0.336	44.9126	48.9546	51.6502	55.141	51.9297	51.3039	54.9918	55.1411
22	1	2002-02-26	0.1	20.905	22.7838	21.0031	20.7355	21.0556	21.9054	26.0565	33.0102
22	1	2002-05-24	0.06	21.1232	22.3188	23.726	25.3252	27.181	29.4545	34.2835	30.0459
22	1	2002-08-26	0	17.3588	18.4104	19.6894	20.9733	21.4844	21.961	22.5398	23.354
23	0	2002-01-11	0.272	49.6991	56.2166	57.8818	54.5614	54.3102	56.4988	59.2064	60.4314
23	0	2002-04-09	0	17.8625	18.1365	18.4445	18.7195	19.0645	19.1504	20.3329	22.1508
23	0	2002-04-17	0.01	45.6174	31.8084	25.6046	22.607	20.9209	19.9598	18.2214	18.4707
23	0	2002-06-26	0.032	23.5657	24.1063	25.0351	26.0623	27.0995	28.2479	25.6731	25.7521
23	0	2003-01-03	0.232	36.8166	40.4131	45.3448	41.0453	37.6969	34.6047	32.0506	36.7195
23	0	2003-04-23	0.288	33.178	34.3887	36.6481	39.6193	42.5738	45.3297	47.1521	51.5746
23	1	2002-02-21	0.088	24.7793	22.9232	23.3476	24.4106	25.5804	26.8818	33.9465	40.6004
23	1	2002-05-20	0.104	24.8574	26.3819	28.1104	28.1898	30.9877	34.1601	35.9511	30.3101
23	1	2002-08-22	0.008	18.528	19.6169	20.68	21.621	22.415	23.2451	21.5749	20.2269
23	1	2002-10-10	0.04	21.4325	21.8441	22.1569	22.6082	23.8229	25.5683	22.9948	21.5061
23	1	2002-10-27	0.072	15.7573	16.2566	16.98	18.0018	19.1325	20.2611	21.9594	21.5793
23	1	2002-11-10	0.088	58.3721	44.6685	35.1824	30.7914	28.3399	27.1276	26.056	26.439
23	1	2002-11-28	0.024	24.0745	27.291	31.0682	35.2392	36.34	34.0657	27.7041	25.4827
23	1	2003-07-04	0.384	41.2662	36.546	31.503	29.2619	28.0004	26.757	25.6271	25.5506
24	0	2002-01-10	0.144	59.7124	65.1728	65.4752	61.7568	61.6378	63.5707	64.4525	63.2576
24	0	2002-04-08	0.032	16.7732	17.0521	17.3743	17.8179	18.1807	18.1728	19.1257	20.5865
24	0	2002-06-25	0.016	26.15	26.1264	26.7758	27.5216	28.2563	28.6837	28.0861	29.522
24	0	2002-09-20	0.184	35.7492	39.3239	36.9717	31.9754	29.2257	27.6973	26.7414	27.5004
24	0	2002-11-09	0.192	58.6767	47.5721	39.9735	37.4522	36.3032	36.8363	36.9136	36.7577
24	0	2002-12-08	0.048	24.8257	26.5737	28.9185	32.2559	36.3612	40.985	40.2579	39.0612
24	0	2003-04-25	0.248	35.8416	37.5629	39.3961	42.221	44.4844	47.2281	48.9171	53.8023
24	1	2002-02-06	0.048	30.1447	31.5838	33.1143	36.0624	39.742	42.2653	49.5542	53.7838
24	1	2002-05-10	0	34.911	32.8507	36.6795	40.2771	43.8294	44.1034	35.0674	31.0309
24	1	2002-08-10	0	23.9487	23.7724	24.0918	24.5815	23.8148	23.2073	22.7459	23.0481
24	1	2002-10-21	0.008	23.5473	25.4477	27.2047	27.3552	27.6844	27.5622	30.0485	26.8153
24	1	2002-11-04	0.008	33.3943	27.5661	26.7426	26.5791	27.4759	28.3319	28.9162	30.5913
24	1	2002-12-30	0.032	41.629	45.5608	43.1778	40.4468	37.42	35.4853	36.086	39.9718
24	1	2003-06-25	0.144	27.2008	27.1225	27.5038	26.9453	26.8989	27.1511	28.5662	29.3011
25	0	2002-01-24	0.024	42.9442	48.5994	51.0254	55.6002	60.7105	60.977	64.2707	67.0998
25	0	2002-04-29	0.048	45.0009	48.2316	51.3624	47.5743	41.4125	37.3839	31.1735	28.2721
25	0	2002-07-17	0	22.4917	23.0011	23.5504	24.0593	24.5585	25.0597	26.9982	27.9369
25	0	2002-09-19	0.016	37.1644	40.237	35.8534	32.1178	30.1937	29.2393	29.2613	30.175
25	0	2002-10-30	0.032	27.1093	29.3884	31.4385	34.3277	36.4303	37.211	36.4672	35.2203
25	0	2002-12-13	0.024	29.7974	28.0056	28.5531	30.0315	32.5044	35.7349	40.6086	38.6168
25	0	2003-02-17	0.088	69.3465	68.6675	58.3164	54.2101	52.3239	52.5137	54.6262	52.4619
25	0	2003-06-09	0.288	28.3899	29.2428	30.1513	31.1914	32.2325	32.5971	34.0994	37.3593
25	1	2002-02-18	0.04	30.4363	31.0562	32.7864	34.4943	36.335	38.3738	46.4224	51.6979
25	1	2002-03-04	0.08	23.983	25.6366	27.6074	27.8916	28.6515	30.0178	34.836	41.8388
25	1	2002-05-18	0.04	35.8771	37.807	39.925	39.8844	43.2603	46.9146	45.1044	38.4465
25	1	2002-08-20	0.032	20.9372	21.5414	22.1135	22.2702	22.5298	22.8623	22.5871	23.0421
25	1	2002-12-04	0.056	27.1419	28.9963	31.6593	34.8481	38.3247	40.406	34.9217	32.5649
25	1	2003-07-13	0.336	40.9812	42.3505	42.6717	40.27	37.6491	36.1086	33.2993	32.9278
26	0	2002-01-29	0.72	20.4223	20.2871	23.0325	25.1602	27.959	31.0601	32.9036	36.1634
26	0	2002-05-08	0.12	13.647	13.0479	14.7602	16.4613	17.8466	16.449	13.6858	12.6394
26	0	2002-08-08	0.056	20.9076	21.7964	23.0468	22.8543	20.4315	18.7998	16.3101	14.7538
26	0	2002-10-01	0.128	22.1886	20.0136	21.0771	23.2932	24.0375	21.6177	18.4359	18.6227
26	0	2003-01-20	0.44	34.9147	41.9035	35.8451	32.4978	31.4233	32.1646	29.2452	25.8371
26	0	2003-06-08	0.744	19.8516	21.1582	22.597	24.2419	25.935	25.591	22.9085	22.9582
27	0	2001-12-10	0.7	52.5795	51.1534	50.644	51.0649	51.0934	51.1132	38.8542	32.7477
27	0	2001-12-11	0.52	53.1795	50.7531	51.1062	50.8272	51.3557	51.0721	39.8266	33.4418
27	0	2002-03-17	0.146667	12.8588	12.3995	12.0383	12.2131	12.7285	13.3693	15.99	18.5962
27	0	2002-06-13	0	15.0722	15.5063	15.5566	15.1745	14.8538	14.8399	16.0152	19.0627
27	0	2002-09-05	0	12.0947	12.6353	13.3903	14.3116	15.4568	16.6881	20.287	19.062
27	0	2002-10-16	0.26	21.9298	23.6013	22.3818	22.2566	22.7031	24.1973	25.8952	22.9317
27	0	2002-12-03	0.28	16.94	18.9167	21.9893	25.9656	30.7409	33.3082	29.0719	26.6724
27	0	2003-03-16	0.45	43.9432	49.2789	50.117	49.9065	49.1118	47.222	41.0175	38.4084
28	0	2001-11-26	0.04	60.2244	57.196	50.3497	44.1733	37.8446	33.6741	27.0234	24.3381
28	0	2002-01-12	0.56	58.4448	65.4174	68.5748	65.4645	64.8377	66.8793	68.5264	69.0038
28	0	2002-06-27	0	22.4494	22.8552	23.3726	23.9189	24.4442	24.6842	25.9654	28.7593
28	0	2002-10-29	0.04	23.0422	24.3082	25.3496	26.9401	28.6306	30.2865	30.3813	29.6881
28	1	2002-04-19	0.2	54.445	44.3836	33.8524	28.6581	25.6124	23.6776	20.7244	20.3445
28	1	2002-06-07	0	26.5457	26.215	26.308	26.8187	27.6027	28.6029	31.9514	35.6495
29	0	2002-02-04	0.186667	24.5601	25.9523	24.0865	25.1085	26.3131	28.3381	32.513	36.0314
29	0	2002-05-07	0.146667	21.8592	23.7701	26.1737	29.0246	30.397	27.6026	23.5576	20.632
29	0	2002-08-04	0	18.3254	19.2497	19.8603	18.6221	17.8664	17.6455	18.4058	18.8409
29	0	2002-09-06	0	9.98235	10.3244	10.8257	11.4393	12.2171	13.0761	15.1181	15.3564
29	0	2002-11-23	0.24	26.3613	31.1719	36.7309	37.9316	34.5856	30.9685	25.3789	23.7528
29	0	2003-06-19	0.08	22.9095	22.7919	21.4109	21.232	21.5945	22.3499	23.3315	23.0683
30	0	2002-01-24	0.048	43.828	49.4482	52.1012	56.8854	62.0619	62.3071	65.758	68.7982
30	0	2002-04-30	0.096	46.0335	48.9311	51.8555	50.2979	44.0648	39.9988	33.7853	30.887
30	0	2002-07-18	0	26.1494	26.6536	27.272	27.8538	28.4184	28.9934	31.1199	32.0464
30	0	2002-09-30	0	39.6723	36.6241	37.2456	38.9231	37.9735	35.3867	32.2836	32.3472
30	0	2002-11-14	0.024	63.6117	62.9594	55.5641	49.197	46.361	45.1567	45.6626	43.589
30	0	2002-12-29	0.032	51.3709	55.8161	49.4901	45.6696	42.3435	40.6813	42.1721	45.5466
30	0	2003-06-14	0.096	33.7187	33.0223	33.4111	34.1122	35.035	36.0192	37.4577	40.4523
30	1	2002-02-18	0.096	33.8251	34.6	36.4943	38.3494	40.3347	42.5256	50.9489	56.3089
30	1	2002-05-17	0.056	40.203	42.1756	44.3873	44.2588	47.7286	51.4163	47.68	40.9589
30	1	2002-08-17	0	19.4394	19.9162	20.1301	20.2869	20.5421	20.6418	20.5233	21.0482
30	1	2003-01-29	0.056	47.283	49.1514	54.196	59.2856	54.8936	52.4121	48.2038	43.2672
30	1	2003-07-14	0.304	42.6069	43.9579	44.8836	42.9978	40.2658	38.6523	35.8758	35.5126
31	0	2002-01-31	0.61	16.5826	14.7121	15.9907	17.8937	20.0645	22.6078	25.1267	28.051
31	0	2002-02-03	0.8	17.2576	17.5691	17.1426	18.6445	20.1343	22.9087	26.382	29.8726
31	0	2002-05-05	0.096	15.0292	19.4285	23.0004	26.5458	26.0374	22.6369	17.2359	14.7273
31	0	2002-08-02	0.24	19.7194	21.2022	19.7502	17.3736	16.1713	15.6397	15.6583	16.7157
31	0	2002-09-09	0.184	14.1701	10.7245	9.90143	9.86891	10.2588	10.9579	13.5454	13.9499
31	0	2003-01-22	0.672	23.5035	29.5948	29.8866	26.8848	25.9733	26.7288	24.8782	21.3018
31	0	2003-06-12	0.888	11.4001	11.0637	11.3786	11.9011	12.5588	13.0456	12.8222	14.0784
32	0	2001-12-23	0.112	58.3941	63.409	66.5519	64.8811	62.8249	62.3707	64.0822	52.1554
32	0	2002-01-08	0.08	67.6807	73.0656	70.3204	68.5934	69.3786	71.14	70.7695	72.2734
32	0	2002-03-29	0	19.1069	18.0323	17.9667	18.081	18.4139	19.0415	21.8875	24.5626
32	0	2002-04-07	0	24.4262	25.8683	26.6454	24.8448	23.9187	23.3324	23.8431	25.7484
32	0	2002-06-18	0.048	37.6273	39.405	40.9848	42.2573	40.6145	38.11	35.6004	36.7625
32	0	2002-06-24	0.04	33.3239	33.4138	34.4521	35.6065	36.6711	36.4464	33.3216	33.4259
32	0	2002-09-27	0.008	28.9746	31.8061	34.8793	36.9198	33.1841	30.8663	28.3533	28.8512
32	0	2002-10-04	0.128	42.5294	39.9129	38.7092	39.8172	42.2433	39.9567	34.5043	34.0896
32	0	2002-11-19	0.12	51.8005	58.1572	60.0386	54.7769	48.7904	45.527	41.6311	40.9612
32	0	2003-01-21	0.032	58.2315	67.0405	61.8544	55.9835	54.0275	54.3073	47.9741	43.3611
32	0	2003-02-18	0.088	62.502	66.4234	60.5248	59.3275	58.8295	57.2666	57.7	54.976
32	0	2003-04-17	0.136	48.8065	52.5639	56.4414	60.06	62.4145	60.5896	64.5186	64.6224
32	0	2003-04-22	0.28	48.6101	50.0022	53.1629	56.4667	59.3566	61.4381	61.8093	65.4083
33	0	2002-01-07	0.168	78.0834	79.8306	74.2835	72.8949	74.7474	76.8397	77.6694	76.1607
33	0	2002-04-06	0.032	20.7604	21.109	21.5306	22.1094	22.2826	22.4226	24.0398	25.9248
33	0	2002-06-23	0.072	32.7516	33.3435	34.2462	35.1301	35.9768	35.6317	34.6876	35.8076
33	0	2002-09-17	0.008	46.3972	47.4299	39.5821	35.7465	33.8764	32.9776	33.038	33.7212
33	0	2002-10-28	0.008	35.5452	37.9299	40.4967	43.9958	44.6958	45.2787	43.5062	41.0942
33	0	2002-11-27	0.192	42.3905	46.8784	52.0122	57.1535	56.8728	53.6277	48.9636	48.949
33	0	2002-12-30	0.184	54.7861	59.363	55.1552	50.4972	46.7632	44.5684	45.2606	49.5376
33	0	2003-04-22	0.248	57.6677	59.2893	62.3928	65.7956	69.0416	70.7343	72.9653	77.2367
33	1	2002-02-19	0.048	33.77	34.0816	35.3939	37.064	39.1336	41.4886	51.2417	58.3644
33	1	2002-05-21	0.072	34.8567	36.2228	37.7195	39.3806	39.405	41.9087	43.464	38.2161
33	1	2002-08-23	0	25.0154	26.0747	27.1324	27.9626	28.5711	29.265	28.2893	27.465
33	1	2002-10-23	0	28.8319	29.8837	31.5266	32.2322	32.9294	33.0496	35.9233	32.9258
33	1	2003-01-30	0.88	54.4033	56.8885	62.4164	68.8116	65.5998	63.3433	61.1584	55.8995
33	1	2003-07-09	0.456	55.1759	56.1371	52.7168	47.8467	45.2025	43.5187	40.6794	40.4776
34	0	2002-01-06	0.376	88.2039	87.1217	81.6188	80.8914	83.1866	85.1528	85.5522	82.0793
34	0	2002-04-01	0.128	23.1201	23.6232	24.3202	24.4179	24.5033	24.8071	27.1139	29.1804
34	0	2002-06-22	0.168	35.801	36.5724	37.5317	38.4556	39.3943	38.3918	37.0448	37.8457
34	0	2002-09-25	0.032	39.1391	41.8222	44.6569	43.3534	40.064	38.1885	36.9122	37.9942
34	0	2002-11-20	0.168	57.9665	63.5785	67.2354	62.815	56.8847	53.6555	50.7162	49.6416
34	0	2003-04-11	0.408	71.0283	74.2189	77.8384	77.5545	75.1605	75.4789	79.7385	79.5563
34	1	2002-02-16	0.176	31.9707	33.8743	35.7412	37.6714	39.982	43.3111	54.4824	60.5833
34	1	2002-05-19	0.136	35.6208	36.9801	38.4398	40.0566	41.9472	44.0988	42.8759	38.1046
34	1	2002-08-21	0	30.1422	31.5005	32.7383	33.497	34.231	35.0771	32.7908	31.5756
34	1	2003-01-31	0.608	50.8671	52.4917	57.4354	63.9229	62.8364	60.7883	59.3371	54.3072
34	1	2003-07-07	0.272	57.1384	55.7901	50.4351	46.4157	44.3017	42.6832	40.6018	40.7038
35	0	2002-03-01	0.52	15.2613	16.48	16.9305	16.9405	17.2891	17.9063	20.5799	27.5426
35	0	2002-05-29	0.2	20.5179	19.9472	20.3634	21.1462	22.1593	22.395	28.2729	25.5055
35	0	2002-08-28	0.016	18.2278	19.354	20.7175	22.1749	23.4769	24.5773	25.1766	23.4025
35	0	2003-01-23	0.448	37.2627	43.7092	45.9752	41.9678	40.845	41.5904	40.6015	36.4279
35	0	2003-06-16	0.608	26.4235	24.8957	24.6552	25.089	25.8562	26.8037	27.668	29.2533
36	0	2001-11-26	0	69.5851	66.492	60.1846	53.2326	45.7592	40.8431	33.0117	29.6745
36	0	2002-01-12	0.46	53.1043	60.7088	65.2192	62.4462	61.5865	63.4294	66.6881	67.108
36	0	2002-06-27	0	16.0489	16.3591	16.7624	17.1959	17.6191	17.768	18.7586	20.914
36	0	2002-10-29	0.0666667	21.0736	22.2961	23.2961	24.86	26.5477	28.2188	28.3265	27.6959
36	0	2003-01-24	0.16	50.7719	58.5437	65.649	58.1386	54.4559	52.1483	47.2379	41.9612
36	0	2003-04-21	0.672	37.0984	39.2254	42.5729	45.6439	49.0834	49.7931	51.4422	53.6394
36	1	2002-03-12	0.024	20.8365	21.6284	22.8176	24.3087	25.7032	26.1858	29.9949	35.5911
36	1	2002-04-19	0.09	58.9829	48.5301	37.775	32.4935	29.4166	27.4841	24.5902	24.4019
36	1	2002-06-07	0	21.0615	20.7032	20.7037	21.0885	21.7323	22.5853	25.6728	29.2811
36	1	2002-10-02	0.096	30.1355	29.7103	31.0991	33.0547	34.4714	31.7385	27.5411	26.1946
36	1	2002-11-05	0.08	29.1409	23.9499	22.5685	22.1537	22.2686	22.669	24.2945	27.1686
36	1	2002-12-31	0.224	33.5316	36.393	36.2459	33.8671	32.0993	30.8677	31.6349	34.9014
36	1	2003-04-29	0.288	31.8102	33.426	34.8706	36.6167	38.8917	41.1269	46.3755	53.3374
37	0	2002-01-21	0.048	69.4613	72.4733	73.8873	77.5168	80.0474	79.3316	82.9774	84.0502
37	0	2002-04-25	0.01	54.9947	57.5693	53.2668	46.9323	43.5155	41.6047	37.1751	35.9138
37	0	2002-07-14	0	35.1378	36.2206	37.1747	38.1482	39.027	39.6915	42.502	41.2361
37	0	2002-10-05	0.008	50.1099	48.8914	46.9656	47.5066	49.1304	47.9371	42.4406	41.97
37	0	2002-12-05	0	37.9223	40.2143	43.5591	47.5577	52.1822	56.1362	51.1711	49.7103
37	0	2003-06-13	0.304	39.3234	39.0987	39.7497	40.6576	41.736	42.8509	44.7713	48.9251
38	0	2002-01-14	0.352	47.2555	53.2772	59.2581	58.0089	56.1765	57.178	61.1891	61.8048
38	0	2002-04-20	0.144	54.3977	49.1956	37.4362	31.6349	28.2317	26.0578	22.7431	22.1242
38	0	2002-07-04	0.016	19.7488	20.2334	20.7315	21.3443	22.0646	22.7935	23.6748	24.8318
38	0	2002-10-29	0.208	19.2153	20.6077	22.1196	24.1811	25.6386	26.7651	27.093	26.4351
38	0	2003-01-24	0.328	44.7551	52.4512	59.4198	52.2948	48.7915	46.5513	41.9413	36.9672
38	0	2003-06-17	0.432	22.7009	22.4524	22.3926	22.7431	23.2835	23.9542	25.0582	27.0096
38	1	2002-02-20	0.368	24.7818	23.5848	24.3375	25.6337	27.3006	28.6532	35.8106	41.8709
38	1	2002-05-22	0.248	26.5843	28.1013	29.8057	31.7585	32.3712	35.3765	39.6295	33.2854
38	1	2002-08-24	0.208	16.0609	16.5273	17.0327	17.4802	17.7376	18.0202	18.0166	18.0812
38	1	2002-09-18	0.616	32.1886	35.4372	28.7233	25.1763	23.234	22.0732	20.811	20.5556
38	1	2002-10-26	0	17.0522	17.6946	18.6601	19.7475	20.64	21.4225	24.1033	23.095
38	1	2003-02-01	0.68	39.4217	38.5791	41.4713	46.8923	47.8434	45.2353	40.6816	35.6755
38	1	2003-04-20	0.88	32.7754	34.3885	36.8173	39.1592	41.861	43.2357	50.2069	53.106

## Sheet: Green leaves
Calibration data for the relationship between the density of green leaf patches (patches/m2) and soil water (mm)
Land unit ID	Vegetation type	Burnt	Early flush	Date	Green leaf patch density (patches/m2)	Average of previous 5 days soil water (mm)	Average of previous 10 days soil water (mm)	Average of previous 15 days soil water (mm)	Average of previous 20 days soil water (mm)	Average of previous 25 days soil water (mm)	Average of previous 30 days soil water (mm)	Average of previous 45 days soil water (mm)	Average of previous 60 days soil water (mm)	Average of previous 90 days soil water (mm)	Average of previous 120 days soil water (mm)	Average of previous 150 days soil water (mm)
1	1	0	0	2002-03-12	0.193961	10.5086	10.6598	11.3007	12.2663	13.1998	13.4841	15.8896	18.3101	26.506	32.203	28.7693
1	1	0	0	2002-03-13	0.193961	10.5159	10.5608	11.0889	11.9582	13.0957	13.2822	15.5087	17.9694	26.0283	31.8434	28.7516
1	1	0	0	2002-03-14	0.193961	10.534	10.4795	10.9026	11.6766	12.7944	13.1003	15.1581	17.6625	25.5641	31.504	28.7363
1	1	0	0	2002-03-15	0.193961	10.3508	10.4071	10.7329	11.4235	12.4475	12.9396	14.8393	17.2321	25.1131	31.1837	28.7207
1	1	0	0	2002-03-16	0.193961	10.5938	10.538	10.7152	11.2948	12.2004	12.8654	14.5987	16.8815	24.7127	30.9031	28.7207
1	1	0	0	2002-03-17	0.193961	11.0475	10.778	10.7891	11.2374	12.0225	12.8411	14.4079	16.5673	24.3408	30.5858	28.7295
1	1	0	0	2002-03-18	0.193961	11.4868	11.0014	10.8695	11.1884	11.8639	12.8275	14.2397	16.281	24.0085	30.2782	28.7386
1	1	0	0	2002-03-19	0.193961	11.8862	11.2101	10.9484	11.1485	11.7186	12.643	14.0554	16.0248	23.7034	29.9759	28.7425
1	1	0	0	2002-03-20	0.193961	12.2565	11.3037	11.0236	11.1138	11.5901	12.4156	13.8451	15.7969	23.4243	29.6886	28.7405
1	1	0	0	2002-03-21	0.193961	12.1604	11.3771	11.0788	11.0765	11.468	12.1937	13.6443	15.5879	23.139	29.3245	28.7367
1	1	0	0	2002-03-22	0.193597	11.8301	11.4388	11.1287	11.0493	11.3559	11.9904	13.4625	15.3968	22.8661	28.9751	28.7331
1	1	0	0	2002-03-23	0.193597	11.5075	11.4971	11.1701	11.029	11.2522	11.8045	13.2994	15.2235	22.6107	28.629	28.7303
1	1	0	0	2002-03-24	0.193597	11.2027	11.5445	11.2077	11.012	11.1594	11.6326	13.15	15.0666	22.3792	28.2944	28.7282
1	1	0	0	2002-03-25	0.193597	11.9621	12.1093	11.5232	11.2582	11.2834	11.6521	13.1286	15.0152	22.1859	28.0392	28.7623
1	1	0	0	2002-03-26	0.193597	12.687	12.4237	11.8137	11.4809	11.3986	11.6711	13.0732	14.9732	22.0096	27.8047	28.794
1	1	0	0	2002-03-27	0.191097	13.3791	12.6046	12.0856	11.6914	11.5153	11.6931	13.0179	14.9386	21.7497	27.5917	28.8237
1	1	0	0	2002-03-28	0.191097	14.0311	12.7693	12.3418	11.8852	11.6294	11.7154	12.9687	14.717	21.4578	27.3079	28.851
1	1	0	0	2002-03-29	0.119997	14.6379	12.9203	12.5756	12.0652	11.7372	11.7391	12.9254	14.5125	21.1141	26.9903	28.876
1	1	0	0	2002-03-30	0.119997	14.1814	13.0718	12.8	12.1877	11.8428	11.7664	12.893	14.3295	20.7439	26.6715	28.9003
1	1	0	0	2002-03-31	0.119997	13.7978	13.2424	12.8817	12.3097	11.9443	11.7984	12.8709	14.1694	20.2657	26.371	28.9243
1	1	0	0	2002-04-01	0.119997	13.4308	13.4049	12.88	12.4219	12.0392	11.8345	12.8541	14.026	19.787	26.0723	28.947
1	1	0	0	2002-04-02	0.119997	13.0847	13.5579	12.8744	12.5275	12.1252	11.8719	12.8432	13.8984	19.3407	25.7967	28.968
1	1	0	0	2002-04-03	0.119997	12.7782	13.708	12.8729	12.6263	12.2078	11.9107	12.7197	13.7598	18.9354	25.5354	28.9879
1	1	0	0	2002-04-04	0.119997	12.4701	13.3258	12.8712	12.7176	12.2442	11.9474	12.5675	13.6016	18.563	25.2841	29.0067
1	1	0	0	2002-04-05	0.119997	12.1676	12.9827	12.8841	12.7032	12.2813	11.9814	12.4239	13.4543	18.1441	25.0193	29.0249
1	1	0	0	2002-04-06	0.119997	11.8834	12.6571	12.8977	12.6308	12.3142	12.0132	12.2929	13.3213	17.7614	24.6482	29.0417
1	1	0	0	2002-04-07	0.119997	11.6207	12.3527	12.9122	12.561	12.3462	12.0411	12.1737	13.2026	17.4067	24.2799	29.0578
1	1	0	0	2002-04-08	0.119997	11.3757	12.0769	12.9306	12.4986	12.3761	12.0691	12.0652	13.0951	17.0506	23.9243	29.0333
1	1	0	0	2002-04-09	0.115197	11.1496	11.8098	12.6004	12.4408	12.404	12.0618	11.9682	12.9966	16.7501	23.5708	28.7624
1	1	0	0	2002-04-10	0.115197	10.9229	11.5452	12.2962	12.3938	12.3471	12.0549	11.8794	12.8789	16.474	23.2454	28.4595
1	1	0	0	2002-04-11	0.115197	10.8164	11.3499	12.0435	12.3774	12.2679	12.0645	11.8099	12.5638	16.2283	22.8956	28.1753
1	1	0	0	2002-04-12	0.115197	12.8768	12.2487	12.5274	12.9033	12.6242	12.4346	11.986	12.6479	16.1245	22.6299	27.9617
1	1	0	0	2002-04-13	0.115197	16.1117	13.7437	13.4218	13.7259	13.2212	12.9987	12.3	12.839	16.1079	22.4228	27.803
1	1	0	0	2002-04-14	0.115197	20.4875	15.8185	14.7024	14.5721	14.0501	13.7512	12.7451	13.1349	16.0718	22.2726	27.6972
1	1	0	0	2002-04-15	0.115197	26.3169	18.6199	16.4691	15.8013	15.1784	14.6754	13.3553	13.5599	16.1462	22.2034	27.6576
1	1	0	0	2002-04-16	0.115197	32.8477	21.8321	18.5158	17.2446	16.4715	15.6979	14.0616	14.059	16.2775	22.18	27.6082
1	1	0	0	2002-04-17	0.115197	37.1279	25.0024	20.5418	18.6775	17.7482	16.7081	14.7619	14.5573	16.4234	22.1834	27.5642
1	1	0	0	2002-04-18	0.115197	40.0131	28.0624	22.5002	20.0696	18.9833	17.6865	15.4405	14.9543	16.5787	22.1992	27.5181
1	1	0	0	2002-04-19	0.115197	41.4426	30.9651	24.3599	21.3874	19.9463	18.6156	16.0849	15.3051	16.7365	22.2221	27.474
1	1	0	0	2002-04-20	0.115197	41.1447	33.7308	26.1282	22.638	20.87	19.5061	16.697	15.6394	16.894	22.2308	27.3609
1	1	0	0	2002-04-21	0.115197	39.9602	36.404	27.8748	23.8769	21.7877	20.3863	17.3004	15.9778	17.06	22.2461	27.2574
1	1	0	0	2002-04-22	0.115197	38.5839	37.8559	29.5295	25.0523	22.6588	21.2208	17.8706	16.3021	17.2226	22.2633	27.1473
1	1	0	0	2002-04-23	0.115197	37.1455	38.5793	31.0901	26.1615	23.4849	22.0103	18.4094	16.611	17.3811	22.287	27.0376
1	1	0	0	2002-04-24	0.115197	35.7829	38.6127	32.571	27.2157	24.2665	22.5857	18.8982	16.9084	17.5387	22.2858	26.9485
1	1	0	0	2002-04-25	0.115197	34.4885	37.8166	33.9833	28.2183	25.0082	23.1397	19.3644	17.1949	17.6954	22.2921	26.8718
1	1	0	0	2002-04-26	0.115197	33.0966	36.5284	35.3015	29.1803	25.7209	23.6725	19.8102	17.4723	17.8499	22.2304	26.8079
1	1	0	0	2002-04-27	0.115197	31.7729	35.1785	35.8282	30.0904	26.3964	24.1778	20.2325	17.7361	17.8706	22.1378	26.6819
1	1	0	0	2002-04-28	0.115197	30.5817	33.8635	35.9134	30.9628	27.0455	24.6676	20.637	17.9929	17.8975	22.0025	26.5258
1	1	0	0	2002-04-29	0.115197	29.4488	32.6158	35.5581	31.7904	27.6623	25.1303	21.0202	18.2379	17.9297	21.8404	26.3632
1	1	0	0	2002-04-30	0.115197	28.3704	31.4294	34.6679	32.5802	28.2487	25.5685	21.3396	18.473	17.9691	21.5914	26.2104
1	1	0	0	2002-05-01	0.115197	27.2668	30.1817	33.4412	33.2928	28.7975	25.9785	21.6124	18.696	18.0101	21.3348	26.0535
1	1	0	0	2002-05-02	0.115197	26.2983	29.0356	32.2184	33.4458	29.332	26.3801	21.8782	18.9155	18.0589	21.1005	25.9134
1	1	0	0	2002-05-03	0.115197	25.3656	27.9736	31.0309	33.2765	29.8435	26.7655	22.1346	19.1276	18.095	20.8929	25.7815
1	1	0	0	2002-05-04	0.115197	24.502	26.9754	29.9112	32.7941	30.3327	27.1356	22.3808	19.331	18.1129	20.7062	25.6544
1	1	0	0	2002-05-05	0.115197	23.6953	26.0328	28.8512	31.9247	30.8032	27.4898	22.6212	19.5252	18.1328	20.4805	25.5134
1	1	0	0	2002-05-06	0.101797	23.0381	25.1524	27.8005	30.8404	31.2419	27.8376	22.8577	19.7149	18.1601	20.2805	25.286
1	1	0	0	2002-05-07	0.101797	22.349	24.3236	26.8067	29.751	31.2264	28.1682	23.0828	19.8941	18.1911	20.0971	25.0575
1	1	0	0	2002-05-08	0.101797	21.6579	23.5118	25.8684	28.6877	30.9528	28.4793	23.2964	20.0637	18.2232	19.9078	24.8353
1	1	0	0	2002-05-09	0.101797	21.0324	22.7672	24.9944	27.6915	30.4417	28.7827	23.3886	20.2118	18.2586	19.7582	24.6131
1	1	0	0	2002-05-10	0.101797	20.4474	22.0714	24.171	26.7504	29.6293	29.0772	23.4835	20.3556	18.2785	19.6248	24.4118
1	1	0	0	2002-05-11	0.101797	19.861	21.4496	23.3886	25.8157	28.6445	29.3451	23.5779	20.4943	18.2979	19.5075	24.1856
1	1	0	0	2002-05-12	0.101797	19.3125	20.8308	22.6532	24.9332	27.6633	29.2408	23.6696	20.6272	18.3192	19.4036	23.952
1	1	0	0	2002-05-13	0.101797	18.8259	20.2419	21.9499	24.1078	26.7153	28.9316	23.7617	20.7547	18.3435	19.3138	23.7246
1	1	0	0	2002-05-14	0.101797	18.328	19.6802	21.2874	23.3278	25.8188	28.4228	23.8493	20.8765	18.3712	19.1596	23.5026
1	1	0	0	2002-05-15	0.091797	17.8361	19.1418	20.6596	22.5873	24.9675	27.6637	23.9322	20.9591	18.4015	19.0255	23.2954
1	1	0	0	2002-05-16	0.091797	17.3637	18.6124	20.0876	21.8823	24.1253	26.7644	24.0149	21.0207	18.4345	18.8992	23.0969
1	1	0	0	2002-05-17	0.091797	16.9315	18.122	19.531	21.2228	23.3328	25.8747	24.097	21.0809	18.4701	18.7862	22.9217
1	1	0	0	2002-05-18	0.094297	16.5057	17.6658	18.9965	20.5887	22.5874	25.0137	24.1758	21.1396	18.4478	18.6874	22.7621
1	1	0	0	2002-05-19	0.094297	16.1015	17.2147	18.4873	19.991	21.8826	24.1992	24.2528	21.197	18.4102	18.6022	22.6176
1	1	0	0	2002-05-20	0.094297	15.7227	16.7794	18.0021	19.4254	21.2144	23.4267	24.3272	21.256	18.3755	18.5272	22.47
1	1	0	0	2002-05-21	0.094297	15.3562	16.3599	17.527	18.9048	20.5772	22.6637	24.4008	21.3145	18.3468	18.4609	22.3297
1	1	0	0	2002-05-22	0.094297	15.003	15.9672	17.0823	18.3987	19.9788	21.9446	24.4728	21.3722	18.3233	18.4031	22.1995
1	1	0	0	2002-05-23	0.094297	14.6905	15.5981	16.674	17.92	19.4091	21.2712	24.5442	21.4303	18.3047	18.3537	22.0839
1	1	0	0	2002-05-24	0.094297	14.3871	15.2443	16.2722	17.4622	18.8702	20.6332	24.6125	21.399	18.2903	18.3123	21.9553
1	1	0	0	2002-05-25	0.091097	14.0936	14.9081	15.8841	17.025	18.359	20.0276	24.6795	21.3732	18.2794	18.2784	21.8392
1	1	0	0	2002-05-26	0.0904545	13.8098	14.583	15.5099	16.5977	17.8858	19.4493	24.7333	21.3504	18.2716	18.2497	21.6742
1	1	0	0	2002-05-27	0.0904545	13.5322	14.2676	15.1555	16.1948	17.4256	18.9044	24.5457	21.3306	18.2659	18.129	21.4912
1	1	0	0	2002-05-28	0.0754545	15.6527	15.1716	15.6163	16.4187	17.4665	18.783	24.4932	21.5149	18.3966	18.1189	21.3586
1	1	0	0	2002-05-29	0.0754545	17.7192	16.0532	16.0693	16.6339	17.5136	18.6783	24.305	21.6938	18.525	18.1169	21.208
1	1	0	0	2002-05-30	0.0754545	19.7053	16.8994	16.5072	16.8394	17.561	18.5834	23.9449	21.8654	18.6501	18.1227	20.9898
1	1	0	0	2002-05-31	0.0754545	21.6143	17.712	16.9267	17.036	17.601	18.5071	23.4852	22.0324	18.7734	18.1344	20.7693
1	1	0	0	2002-06-01	0.0754545	23.3891	18.4607	17.3081	17.214	17.6336	18.4196	23.0192	22.1893	18.8905	18.1491	20.5644
1	1	0	0	2002-06-02	0.0754545	22.9535	19.3031	17.7655	17.4505	17.7256	18.381	22.5976	22.3627	19.0191	18.1665	20.3905
1	1	0	0	2002-06-03	0.0754545	22.6821	20.2006	18.2628	17.7224	17.8436	18.375	22.2204	22.5448	19.1527	18.1784	20.4059
1	1	0	0	2002-06-04	0.0754545	22.4915	21.0984	18.7634	18.0033	17.9699	18.3829	21.8723	22.7258	19.2847	18.1953	20.2269
1	1	0	0	2002-06-05	0.0754545	22.3333	21.9737	19.2524	18.2784	18.0954	18.3898	21.5266	22.9032	19.4135	18.2175	20.2519
1	1	0	0	2002-06-06	0.0754545	22.2617	22.8254	19.7277	18.5465	18.2235	18.405	21.2057	23.0761	19.5381	18.2446	20.1082
1	1	0	0	2002-06-07	0.0754545	21.9863	22.4699	20.1975	18.8208	18.3577	18.4358	20.9133	23.247	19.6614	18.2763	19.963
1	1	0	0	2002-06-08	0.0494545	21.6164	22.1492	20.6725	19.1012	18.5013	18.4724	20.6464	23.4171	19.7723	18.3121	19.8506
1	1	0	0	2002-06-09	0.0494545	21.2447	21.8681	21.1471	19.3838	18.6516	18.5156	20.4008	23.5859	19.8826	18.3377	19.7526
1	1	0	0	2002-06-10	0.0494545	20.886	21.6096	21.6112	19.6608	18.7999	18.5605	20.1699	23.7423	19.9901	18.3636	19.6677
1	1	0	0	2002-06-11	0.0494545	20.5606	21.4111	22.0704	19.9359	18.9493	18.613	19.9598	23.7164	20.0961	18.3926	19.595
1	1	0	0	2002-06-12	0.0494545	20.2374	21.1118	21.7257	20.2075	19.104	18.671	19.764	23.5909	20.2005	18.4254	19.5348
1	1	0	0	2002-06-13	0.0494545	19.8802	20.7483	21.3929	20.4744	19.257	18.7311	19.5832	23.3664	20.3017	18.4612	19.4234
1	1	0	0	2002-06-14	0.0494545	19.4921	20.3684	21.0761	20.7334	19.4054	18.7917	19.4143	23.0172	20.3769	18.4991	19.3283
1	1	0	0	2002-06-15	0.0494545	19.1084	19.9972	20.7759	20.9855	19.5503	18.8513	19.2634	22.5974	20.4379	18.5387	19.2392
1	1	0	0	2002-06-16	0.0494545	18.7042	19.6325	20.5088	21.2289	19.6896	18.9085	19.116	22.1811	20.4971	18.5797	19.1602
1	1	0	0	2002-06-17	0.0442545	18.284	19.2607	20.1692	20.8653	19.8228	18.9674	18.9771	21.7801	20.5559	18.5777	19.093
1	1	0	0	2002-06-18	0.0442545	17.8675	18.8738	19.788	20.5115	19.9531	19.0254	18.846	21.4018	20.6134	18.564	19.0364
1	1	0	0	2002-06-19	0.0442545	17.4785	18.4854	19.4051	20.1767	20.0825	19.0843	18.7236	21.045	20.6724	18.5527	18.9882
1	1	0	0	2002-06-20	0.0442545	17.0992	18.1038	19.0312	19.8567	20.2082	19.1418	18.6035	20.6923	20.7306	18.5456	18.9467
1	1	0	0	2002-06-21	0.0442545	17.5085	18.1063	18.9244	19.7586	20.4848	19.326	18.5781	20.4248	20.8305	18.574	18.9373
1	1	0	0	2002-06-22	0.0442545	17.9297	18.1069	18.817	19.6094	20.2782	19.5072	18.5629	20.1788	20.9296	18.6053	18.934
1	1	0	0	2002-06-23	0.0381	18.3666	18.117	18.7047	19.4326	20.0825	19.6886	18.5498	19.9505	20.9692	18.6399	18.9371
1	1	0	0	2002-06-24	0.0381	18.7863	18.1324	18.5857	19.2505	19.8986	19.8664	18.539	19.7365	21.0112	18.6762	18.9456
1	1	0	0	2002-06-25	0.0371	19.1929	18.146	18.4668	19.0716	19.724	20.039	18.5293	19.5337	21.0536	18.7135	18.9571
1	1	0	0	2002-06-26	0.0371	18.8631	18.1858	18.3586	18.9091	19.5796	20.2145	18.5282	19.349	21.0989	18.753	18.8957
1	1	0	0	2002-06-27	0.0371	18.5539	18.2419	18.2559	18.7513	19.3983	19.9908	18.5326	19.1765	21.1472	18.7951	18.8428
1	1	0	0	2002-06-28	0.0371	18.2577	18.3122	18.1639	18.593	19.1977	19.7783	18.542	19.0179	21.1957	18.8384	18.7987
1	1	0	0	2002-06-29	0.0371	17.9795	18.3829	18.0814	18.4341	18.9962	19.5788	18.5549	18.8706	21.2436	18.8823	18.7635
1	1	0	0	2002-06-30	0.0363727	17.724	18.4585	18.0053	18.2811	18.8021	19.3906	18.5693	18.7384	21.2921	18.9277	18.7352
1	1	0	0	2002-07-01	0.0363727	17.5254	18.1943	17.9657	18.1503	18.6324	19.2373	18.5942	18.6179	21.3456	18.9772	18.7163
1	1	0	0	2002-07-02	0.0363727	17.3104	17.9321	17.9313	18.0195	18.4631	19.0503	18.622	18.5052	21.3989	19.0269	18.6929
1	1	0	0	2002-07-03	0.0363727	17.0948	17.6763	17.9064	17.8967	18.2933	18.8472	18.6524	18.4006	21.4526	19.0763	18.6618
1	1	0	0	2002-07-04	0.0363727	16.8839	17.4317	17.8833	17.7821	18.1241	18.6442	18.6839	18.303	21.5056	19.1245	18.6346
1	1	0	0	2002-07-05	0.0363727	16.6982	17.2111	17.8717	17.6786	17.9645	18.4514	18.7184	18.2101	21.5596	19.173	18.6138
1	1	0	0	2002-07-06	0.0363727	16.4317	16.9785	17.6067	17.5822	17.8066	18.2656	18.7529	18.1248	21.6129	19.22	18.5984
1	1	0	0	2002-07-07	0.0363727	16.1686	16.7395	17.3443	17.4907	17.6493	18.0807	18.7863	18.0477	21.6652	19.2662	18.5868
1	1	0	0	2002-07-08	0.0363727	15.9157	16.5053	17.0894	17.4087	17.5005	17.8971	18.8222	17.9742	21.7174	19.3035	18.5786
1	1	0	0	2002-07-09	0.0363727	15.6609	16.2724	16.8414	17.3277	17.3579	17.7137	18.8581	17.9041	21.7688	19.3403	18.5624
1	1	0	0	2002-07-10	0.0363727	15.3704	16.0343	16.5975	17.2464	17.2169	17.5321	18.8918	17.8359	21.8126	19.3756	18.5469
1	1	0	0	2002-07-11	0.0338727	15.0524	15.742	16.3365	16.9682	17.0762	17.3476	18.9218	17.7698	21.7338	19.409	18.5332
1	1	0	0	2002-07-12	0.0338727	14.7453	15.4569	16.0747	16.6945	16.9416	17.1653	18.6854	17.7077	21.5893	19.4417	18.523
1	1	0	0	2002-07-13	0.0338727	14.4424	15.179	15.8177	16.4277	16.8154	16.9908	18.4581	17.6504	21.3815	19.474	18.5167
1	1	0	0	2002-07-14	0.0338727	14.1565	14.9087	15.5671	16.1702	16.6934	16.8243	18.2416	17.5975	21.0932	19.4888	18.5137
1	1	0	0	2002-07-15	0.0338727	13.9077	14.6391	15.3254	15.9251	16.5787	16.6654	18.0356	17.5479	20.7603	19.4948	18.5136
1	1	0	0	2002-07-16	0.0338727	13.7173	14.3849	15.0672	15.6817	16.318	16.5164	17.8472	17.502	20.4332	19.5019	18.5166
1	1	0	0	2002-07-17	0.0338727	13.5304	14.1378	14.8147	15.4387	16.0617	16.373	17.6384	17.4598	20.118	19.5102	18.4863
1	1	0	0	2002-07-18	0.0338727	13.444	13.9432	14.6007	15.2242	15.8309	16.2535	17.4317	17.429	19.826	19.5234	18.4515
1	1	0	0	2002-07-19	0.0338727	13.7326	13.9445	14.5167	15.1085	15.6827	16.2	17.2683	17.4316	19.5703	19.5543	18.4713
1	1	0	0	2002-07-20	0.0338727	14.119	14.0134	14.4657	15.0238	15.5639	16.1687	17.1229	17.4447	19.3248	19.5902	18.4593
1	1	0	0	2002-07-21	0.0338727	14.6398	14.1786	14.4699	14.9603	15.4733	16.0383	17.0003	17.4717	19.103	19.6324	18.456
1	1	0	0	2002-07-22	0.0338727	17.533	15.5317	15.2696	15.2139	15.8575	16.3069	17.1436	17.6966	19.0285	19.7739	18.5348
1	1	0	0	2002-07-23	0.0338727	20.287	16.8653	16.0577	15.4371	16.2367	16.5736	17.284	17.9206	18.9652	19.8703	18.6158
1	1	0	0	2002-07-24	0.0338727	22.5856	18.1591	16.8249	15.6443	16.6039	16.8332	17.4174	18.1392	18.9091	19.9667	18.6968
1	1	0	0	2002-07-25	0.0338727	24.6925	19.4058	17.573	15.8437	16.9576	17.0853	17.5458	18.3517	18.8578	20.0615	18.777
1	1	0	0	2002-07-26	0.0338727	26.5405	20.5901	18.2992	16.03	17.2763	17.3178	17.6648	18.5557	18.8123	20.1536	18.8551
1	1	0	0	2002-07-27	0.0338727	25.9884	21.7607	19.0173	16.4917	17.5931	17.546	17.7826	18.5579	18.7733	20.2469	18.9345
1	1	0	0	2002-07-28	0.0338727	25.4299	22.8584	19.7202	16.9433	17.9038	17.7689	17.9006	18.5632	18.7419	20.3389	19.0136
1	1	0	0	2002-07-29	0.0338727	24.856	23.7208	20.3914	17.3752	18.1983	17.9792	18.0133	18.5686	18.7138	20.4275	19.0908
1	1	0	0	2002-07-30	0.0348727	24.3272	24.5098	21.0462	17.8041	18.4834	18.1859	18.1257	18.5777	18.6946	20.5155	19.1685
1	1	0	0	2002-07-31	0.0348727	23.7737	25.1571	21.6513	18.2103	18.7447	18.3592	18.228	18.5878	18.672	20.599	19.2428
1	1	0	0	2002-08-01	0.0348727	23.2431	24.6157	22.2549	18.6162	19.008	18.5348	18.3336	18.5821	18.6554	20.6829	19.3176
1	1	0	0	2002-08-02	0.0348727	22.7543	24.0921	22.8237	19.0212	19.2715	18.7122	18.4436	18.5692	18.6448	20.7675	19.3927
1	1	0	0	2002-08-03	0.0348727	22.3357	23.5958	23.2591	19.42	19.5333	18.8879	18.5525	18.5556	18.6383	20.8512	19.4664
1	1	0	0	2002-08-04	0.0345091	21.8517	23.0894	23.6238	19.7901	19.7796	19.0447	18.6537	18.5376	18.6286	20.9309	19.5365
1	1	0	0	2002-08-05	0.0345091	21.474	22.6239	23.9294	20.1495	20.0291	19.1996	18.6686	18.5221	18.6234	21.0095	19.605
1	1	0	0	2002-08-06	0.0345091	21.3962	22.3197	23.5426	20.5827	20.3382	19.406	18.7188	18.5329	18.6408	21.1004	19.6833
1	1	0	0	2002-08-07	0.0345091	21.259	22.0067	23.1477	20.975	20.6348	19.6027	18.7649	18.5394	18.6574	21.1887	19.7525
1	1	0	0	2002-08-08	0.0345091	21.07	21.7029	22.7539	21.2543	20.9159	19.7894	18.8067	18.541	18.6729	21.274	19.8193
1	1	0	0	2002-08-09	0.0345091	20.9378	21.3948	22.3722	21.4948	21.1857	19.9727	18.8476	18.5419	18.6884	21.3526	19.8842
1	1	0	0	2002-08-10	0.0345091	20.7711	21.1225	22.0063	21.6823	21.4398	20.1527	18.8807	18.5397	18.7044	21.3385	19.9469
1	1	0	0	2002-08-11	0.0345091	20.2389	20.8176	21.6261	21.2591	21.6799	20.3217	18.906	18.533	18.7193	21.2724	20.0068
1	1	0	0	2002-08-12	0.0345091	19.726	20.4925	21.2464	20.8348	21.8912	20.4833	18.9281	18.5266	18.7351	21.157	20.065
1	1	0	0	2002-08-13	0.0315091	19.2121	20.141	20.8726	20.411	22.0119	20.632	18.9437	18.5176	18.7493	20.9779	19.8963
1	1	0	0	2002-08-14	0.0315091	18.6952	19.8165	20.4949	19.9955	22.1009	20.7706	18.9555	18.5075	18.7624	20.7629	19.9289
1	1	0	0	2002-08-15	0.0301091	18.1888	19.48	20.1446	19.5944	22.1496	20.898	18.9544	18.4967	18.7743	20.5494	19.96
1	1	0	0	2002-08-16	0.0301091	17.7119	18.9754	19.7823	19.19	21.7157	21.0186	18.9506	18.4853	18.7864	20.3432	19.9907
1	1	0	0	2002-08-17	0.0301091	17.1733	18.4496	19.386	18.7707	21.2685	21.1049	18.9368	18.4687	18.7946	20.1458	20.0186
1	1	0	0	2002-08-18	0.0301091	16.6218	17.9169	18.9679	18.3524	20.8191	21.1135	18.9146	18.4463	18.7993	19.9561	20.045
1	1	0	0	2002-08-19	0.0301091	16.0747	17.385	18.5692	17.9324	20.3773	21.0965	18.8862	18.4221	18.8023	19.7677	20.0703
1	1	0	0	2002-08-20	0.0301091	15.5712	16.88	18.177	17.5438	19.9557	21.0532	18.8588	18.3353	18.8058	19.5905	20.0955
1	1	0	0	2002-08-21	0.0301091	15.0602	16.3861	17.6703	17.1443	19.5301	20.6064	18.8275	18.2462	18.8069	19.423	20.1193
1	1	0	0	2002-08-22	0.0283818	14.6133	15.8933	17.1709	16.7354	19.1052	20.1593	18.7921	18.1559	18.8072	19.2637	20.107
1	1	0	0	2002-08-23	0.0283818	14.2252	15.4235	16.6864	16.3248	18.693	19.7202	18.7551	18.0662	18.8066	19.1118	20.0963
1	1	0	0	2002-08-24	0.0283818	13.8567	14.9657	16.2089	15.9336	18.2832	19.2905	18.7181	17.9775	18.8049	18.966	20.0863
1	1	0	0	2002-08-25	0.0335818	13.4756	14.5234	15.7452	15.5442	17.8961	18.8757	18.6835	17.8863	18.8027	18.8281	20.0769
1	1	0	0	2002-08-26	0.0335818	13.1251	14.0926	15.2991	15.0765	17.5065	18.4626	18.6475	17.7938	18.6665	18.6956	20.0688
1	1	0	0	2002-08-27	0.0335818	12.7972	13.7053	14.8613	14.62	17.1138	18.0539	18.6093	17.7009	18.5337	18.5699	20.0608
1	1	0	0	2002-08-28	0.0335818	12.4726	13.3489	14.4399	14.1754	16.7204	17.6562	18.568	17.6073	18.4048	18.4494	20.0521
1	1	0	0	2002-08-29	0.0335818	12.1671	13.0119	14.0328	13.7409	16.3463	17.2639	18.5247	17.5144	18.2801	18.3369	20.0441
1	1	0	0	2002-08-30	0.0335818	11.8743	12.6749	13.6404	13.3199	15.9762	16.8925	18.4787	17.4154	18.163	18.2271	20.0366
1	1	0	0	2002-08-31	0.0232636	11.6072	12.3661	13.2641	12.9186	15.5487	16.5232	18.4338	17.3185	18.0361	18.1224	20.0299
1	1	0	0	2002-09-01	0.0210636	11.3595	12.0783	12.9233	12.5283	15.1339	16.1547	18.3777	17.223	17.9047	18.0222	20.0238
1	1	0	0	2002-09-02	0.0210636	11.1558	11.8142	12.6179	12.1614	14.7375	15.7929	18.2816	17.1299	17.775	17.9269	20.0184
1	1	0	0	2002-09-03	0.0210636	10.9817	11.5744	12.3352	11.8126	14.3551	15.4522	18.1761	17.0381	17.6495	17.8345	20.014
1	1	0	0	2002-09-04	0.0210636	10.8228	11.3485	12.0575	11.4784	13.9865	15.1173	18.0546	16.948	17.5275	17.7469	20.01
1	1	0	0	2002-09-05	0.0210636	10.6642	11.1357	11.7988	11.1567	13.6337	14.7346	17.6706	16.8598	17.4071	17.6643	20.0061
1	1	0	0	2002-09-06	0.0210636	10.5083	10.9339	11.555	10.8621	13.2903	14.3629	17.2912	16.7724	17.2876	17.5838	20.0025
1	1	0	0	2002-09-07	0.0210636	10.8782	11.017	11.5022	10.7255	13.0707	14.0943	16.9808	16.7314	17.1991	17.5282	20.0169
1	1	0	0	2002-09-08	0.0210636	12.1692	11.5754	11.7727	10.8362	13.0499	13.9908	16.7846	16.7712	17.1652	17.514	20.0591
1	1	0	0	2002-09-09	0.0210636	20.2218	15.5223	14.3063	12.6411	14.3931	15.0258	17.3525	17.3788	17.5087	17.7848	20.2548
1	1	0	0	2002-09-10	0.0210636	27.7741	19.2192	16.6818	14.3351	15.6462	15.9904	17.869	17.9456	17.8258	18.0371	20.3949
1	1	0	0	2002-09-11	0.0210636	34.7341	22.6213	18.8673	15.8923	16.8025	16.8643	18.325	18.4634	18.1128	18.2674	20.4774
1	1	0	0	2002-09-12	0.0210636	40.7632	25.8207	20.9324	17.36	17.899	17.6861	18.7483	18.9486	18.3808	18.4835	20.4984
1	1	0	0	2002-09-13	0.0210636	45.3727	28.771	22.8412	18.7152	18.9095	18.437	19.123	19.3933	18.6243	18.6811	20.4766
1	1	0	0	2002-09-14	0.0214273	42.7403	31.4811	24.5949	19.9573	19.8269	19.1176	19.46	19.7973	18.844	18.8601	20.4419
1	1	0	0	2002-09-15	0.0214273	40.1677	33.9709	26.202	21.0958	20.6677	19.7331	19.7495	20.1654	19.0416	19.023	20.4
1	1	0	0	2002-09-16	0.0214273	38.0971	36.4157	27.7799	22.2172	21.4993	20.3516	20.0298	20.5178	19.2367	19.1838	20.3658
1	1	0	0	2002-09-17	0.0474273	36.0666	38.4149	29.236	23.2585	22.2673	20.9269	20.2739	20.8097	19.4135	19.3312	20.3292
1	1	0	0	2002-09-18	0.118527	34.2183	39.7955	30.5868	24.228	22.9818	21.461	20.4971	21.0682	19.5754	19.467	20.2852
1	1	0	0	2002-09-19	0.118527	32.5572	37.6488	31.8398	25.128	23.6432	21.9487	20.6914	21.2904	19.6801	19.5915	20.241
1	1	0	0	2002-09-20	0.121527	31.1303	35.6489	33.024	25.9766	24.2687	22.4114	20.8311	21.2985	19.7749	19.708	20.1995
1	1	0	0	2002-09-21	0.121527	29.5091	33.8031	34.1135	26.7547	24.8416	22.8342	20.9467	21.2863	19.8557	19.8139	20.1567
1	1	0	0	2002-09-22	0.121527	28.0306	32.0486	34.9535	27.4772	25.3789	23.2278	21.0474	21.2635	19.927	19.9119	20.1139
1	1	0	0	2002-09-23	0.134927	26.5834	30.4008	35.3915	28.1284	25.8652	23.5821	21.1244	21.2259	19.986	19.9992	20.0681
1	1	0	0	2002-09-24	0.134927	25.2366	28.8969	33.5113	28.7315	26.3157	23.9088	21.1876	21.1818	20.0341	20.0792	20.0231
1	1	0	0	2002-09-25	0.132327	23.8525	27.4914	31.7163	29.2737	26.7178	24.1994	21.2326	21.1205	20.0693	20.0497	19.9752
1	1	0	0	2002-09-26	0.132327	22.5823	26.0457	30.0629	29.7731	27.0862	24.465	21.2638	21.049	20.096	20.0166	19.9278
1	1	0	0	2002-09-27	0.133055	21.393	24.7118	28.4967	30.1058	27.4263	24.7146	21.2896	20.9749	20.1167	19.9822	19.8813
1	1	0	0	2002-09-28	0.133055	20.6529	23.6181	27.1515	30.2494	27.7993	24.9964	21.3419	20.9196	20.1487	19.9592	19.8477
1	1	0	0	2002-09-29	0.133055	20.0318	22.6342	25.9419	28.684	28.1576	25.2684	21.3924	20.87	20.1734	19.9393	19.8142
1	1	0	0	2002-09-30	0.143055	19.5122	21.6824	24.8317	27.2082	28.4875	25.5168	21.4326	20.8096	20.1916	19.9063	19.7801
1	1	0	0	2002-10-01	0.143055	19.1728	20.8776	23.7547	25.8828	28.8191	25.7673	21.486	20.7505	20.2114	19.8703	19.7501
1	1	0	0	2002-10-02	0.143055	18.8793	20.1361	22.7676	24.6349	29.0265	26.0018	21.5405	20.6869	20.2275	19.8317	19.7208
1	1	0	0	2002-10-03	0.143055	18.4221	19.5375	21.8862	23.5117	29.0499	26.2364	21.6027	20.6338	20.2445	19.7962	19.6938
1	1	0	0	2002-10-04	0.149209	17.9636	18.9977	21.0773	22.4898	27.7059	26.4586	21.6582	20.5775	20.2585	19.7602	19.6681
1	1	0	0	2002-10-05	0.149209	17.6449	18.5786	20.3366	21.5775	26.4615	26.6803	21.7198	20.497	20.2736	19.7254	19.6464
1	1	0	0	2002-10-06	0.149209	17.2824	18.2276	19.6792	20.6792	25.3288	26.8963	21.7825	20.4192	20.2873	19.6898	19.6197
1	1	0	0	2002-10-07	0.170609	16.9017	17.8905	19.058	19.8436	24.2542	27.0058	21.8379	20.3395	20.2965	19.6507	19.5972
1	1	0	0	2002-10-08	0.170609	18.4169	18.4196	19.164	19.5614	23.6587	27.2778	22.1094	20.4238	20.4137	19.6933	19.6403
1	1	0	0	2002-10-09	0.175409	19.8969	18.9302	19.2974	19.3247	23.1372	26.4044	22.3717	20.5046	20.5276	19.7326	19.6822
1	1	0	0	2002-10-10	0.175409	21.3416	19.4933	19.4996	19.1303	22.6963	25.6082	22.6328	20.5888	20.6401	19.7714	19.7248
1	1	0	0	2002-10-11	0.177136	22.6326	19.9575	19.6959	18.96	22.2358	24.8794	22.8753	20.6614	20.7423	19.8044	19.7633
1	1	0	0	2002-10-12	0.177136	23.7865	20.3442	19.8559	18.7826	21.7982	24.1763	23.095	20.7207	20.8314	19.8297	19.7955
1	1	0	0	2002-10-13	0.177136	22.8287	20.6228	19.8893	18.6227	21.3808	23.5204	23.2941	20.7683	20.9093	19.8484	19.8224
1	1	0	0	2002-10-14	0.181055	21.8193	20.8581	19.8932	18.4704	20.9896	22.9176	23.4768	20.8071	20.9777	19.8624	19.8451
1	1	0	0	2002-10-15	0.183255	20.6992	21.0204	19.8952	18.342	20.6101	22.3635	23.643	20.8378	21.0384	19.8721	19.8646
1	1	0	0	2002-10-16	0.183255	19.6388	21.1357	19.8512	18.2242	20.2618	21.803	23.7953	20.8668	21.0865	19.8783	19.8812
1	1	0	0	2002-10-17	0.183255	18.6803	21.2334	19.7895	18.1045	19.9282	21.2786	23.931	20.8923	21.1063	19.8797	19.8941
1	1	0	0	2002-10-18	0.183618	17.8015	20.3151	19.6824	17.9098	19.6245	20.7843	24.0517	20.9122	21.1139	19.8776	19.9039
1	1	0	0	2002-10-19	0.185018	16.976	19.3976	19.5641	17.7064	19.3374	20.3207	24.1604	20.9242	21.1075	19.8402	19.9109
1	1	0	0	2002-10-20	0.185018	16.1862	18.4427	19.409	17.5105	19.0769	19.8728	24.2565	20.9316	20.9635	19.7994	19.9145
1	1	0	0	2002-10-21	0.185018	16.567	18.1029	19.6128	17.5727	19.0588	19.646	24.4685	21.0296	20.8798	19.8033	19.9538
1	1	0	0	2002-10-22	0.185018	16.9968	17.8385	19.8212	17.6338	19.0489	19.4396	24.6109	21.1232	20.7959	19.8052	19.9909
1	1	0	0	2002-10-23	0.185018	17.3992	17.6004	19.3431	17.6541	18.9738	19.2536	24.6329	21.2074	20.7087	19.8029	20.0236
1	1	0	0	2002-10-24	0.187518	17.785	17.3805	18.8601	17.6618	18.8882	19.0787	23.8896	21.2833	20.6211	19.7953	20.0526
1	1	0	0	2002-10-25	0.187518	18.0877	17.137	18.3244	17.6212	18.7919	18.912	23.1803	21.3452	20.5246	19.78	19.9956
1	1	0	0	2002-10-26	0.187518	17.2554	16.9112	17.8204	17.5659	18.6752	18.7582	22.5264	21.4012	20.4257	19.7615	19.9383
1	1	0	0	2002-10-27	0.187518	16.4196	16.7082	17.3655	17.5133	18.557	18.6107	21.9061	21.4522	20.3272	19.7402	19.8814
1	1	0	0	2002-10-28	0.187518	15.6329	16.5161	16.9446	16.9581	18.4159	18.4169	21.3284	21.4962	20.2257	19.7157	19.8242
1	1	0	0	2002-10-29	0.187518	14.8803	16.3327	16.5471	16.4076	18.2715	18.2202	20.7941	21.5338	20.127	19.685	19.769
1	1	0	0	2002-10-30	0.187518	14.3221	16.2049	16.1987	15.8663	18.1274	18.047	20.3085	21.5714	20.029	19.6554	19.7079
1	1	0	0	2002-10-31	0.187518	14.0666	15.661	15.963	15.4244	18.0321	17.9071	19.8563	21.6267	19.943	19.6353	19.6512
1	1	0	0	2002-11-01	0.187518	16.6887	16.5542	16.7017	15.7388	18.5144	18.2455	19.7529	21.9132	20.0135	19.732	19.688
1	1	0	0	2002-11-02	0.187518	19.9083	17.7706	17.6468	16.228	18.7141	18.6646	19.7385	22.2401	20.1177	19.8495	19.7434
1	1	0	0	2002-11-03	0.187518	23.6704	19.2754	18.7786	16.8704	19.0262	19.1713	19.8067	22.6044	20.249	19.9868	19.8159
1	1	0	0	2002-11-04	0.187518	27.1578	20.7399	19.8558	17.481	19.2906	19.6325	19.8671	22.9459	20.3491	20.1133	19.8803
1	1	0	0	2002-11-05	0.187518	29.9301	21.9984	20.4174	17.9973	19.4916	20.0151	19.9031	23.2452	20.4248	20.2193	19.9283
1	1	0	0	2002-11-06	0.187518	32.8203	24.7545	21.9762	19.2738	20.3211	20.8987	20.2851	23.7417	20.6662	20.447	20.0738
1	1	0	0	2002-11-07	0.188161	38.36	29.1341	24.6337	21.3676	21.8204	21.9884	21.047	24.4226	21.0857	20.8074	20.3258
1	1	0	0	2002-11-08	0.188161	43.4157	33.5431	27.3221	23.4803	23.3455	23.0911	21.8265	24.5373	21.5071	21.1685	20.5778
1	1	0	0	2002-11-09	0.188161	48.2361	37.6969	29.9053	25.4934	24.798	24.1148	22.5764	24.651	21.9045	21.5088	20.8136
1	1	0	0	2002-11-10	0.188161	52.8579	41.3941	32.2849	27.07	26.1354	25.0526	23.267	24.7555	22.2654	21.82	21.0276
1	1	0	0	2002-11-11	0.188161	54.2208	43.5215	34.5773	28.5804	27.4297	25.9714	23.9329	24.8634	22.6113	22.1165	21.2315
1	1	0	0	2002-11-12	0.188161	51.9776	45.1693	36.7489	30.0124	28.6558	26.8467	24.5276	24.9731	22.9347	22.3937	21.4215
1	1	0	0	2002-11-13	0.188161	49.522	46.4688	38.8693	31.4145	29.8547	27.7082	25.1032	25.1024	23.2478	22.6607	21.605
1	1	0	0	2002-11-14	0.188161	47.0593	47.6456	40.8163	32.7353	30.9718	28.5075	25.6368	25.225	23.5347	22.9056	21.7726
1	1	0	0	2002-11-15	0.188161	44.8915	48.8748	42.5598	33.979	31.8003	29.2614	26.1247	25.3217	23.8053	23.1301	21.9284
1	1	0	0	2002-11-16	0.191361	42.4112	48.3173	43.1516	35.0783	32.5126	29.9266	26.5476	25.3921	24.044	23.3113	22.0626
1	1	0	0	2002-11-17	0.191361	40.1039	46.0407	43.4808	36.1302	33.1967	30.5638	26.9367	25.4636	24.2697	23.4764	22.1883
1	1	0	0	2002-11-18	0.191361	37.4454	43.4836	43.461	37.0559	33.7867	31.1198	27.268	25.5098	24.4631	23.6106	22.2696
1	1	0	0	2002-11-19	0.191361	35.1281	41.0916	43.4737	37.9368	34.3799	31.6645	27.5794	25.5582	24.6495	23.6387	22.3459
1	1	0	0	2002-11-20	0.191361	32.8644	38.8779	43.5378	38.6785	34.9221	31.9776	27.856	25.6013	24.8193	23.6543	22.4116
1	1	0	0	2002-11-21	0.191361	30.9638	36.6876	42.5329	38.6471	35.4214	32.2544	28.1101	25.6365	24.974	23.6605	22.4685
1	1	0	0	2002-11-22	0.192961	28.9929	34.5485	40.3585	38.4013	35.8688	32.4961	28.1118	25.6643	25.1106	23.6556	22.515
1	1	0	0	2002-11-23	0.192961	27.3903	32.4178	38.1192	37.9859	36.2888	32.7207	28.1005	25.6892	25.2361	23.646	22.5538
1	1	0	0	2002-11-24	0.192961	25.7055	30.4167	35.963	37.5737	36.6565	32.9341	28.0642	25.7126	25.3485	23.627	22.5843
1	1	0	0	2002-11-25	0.192961	24.0514	28.4579	33.9357	37.2087	36.919	33.1103	28.0137	25.7237	25.4445	23.5968	22.6047
1	1	0	0	2002-11-26	0.193961	22.5168	26.7404	31.9639	36.0712	36.587	33.2706	27.9689	25.7302	25.532	23.5631	22.6198
1	1	0	0	2002-11-27	0.193961	21.1761	25.0845	30.0909	34.1054	36.1222	33.42	27.9282	25.708	25.6111	23.5243	22.6301
1	1	0	0	2002-11-28	0.193961	19.5773	23.4837	28.2568	32.0262	35.4702	33.5035	27.8514	25.6513	25.6839	23.486	22.6341
1	1	0	0	2002-11-29	0.193961	18.4808	22.0931	26.5573	30.1349	34.9212	33.6272	27.8177	25.6266	25.7502	23.4435	22.6352
1	1	0	0	2002-11-30	0.193961	17.529	20.7902	24.9341	28.3765	34.4389	33.6874	27.7793	25.5868	25.8071	23.394	22.6311
1	1	0	0	2002-12-01	0.193961	16.8409	19.6788	23.5597	26.7256	33.3912	33.296	27.7646	25.5603	25.8676	23.349	22.6302
1	1	0	0	2002-12-02	0.193961	16.2468	18.7114	22.2578	25.1724	31.6996	32.8097	27.7555	25.5267	25.9234	23.3923	22.6269
1	1	0	0	2002-12-03	0.193961	15.666	17.8004	21.1162	23.6516	29.9916	32.229	27.7456	25.4897	25.9729	23.3456	22.6206
1	1	0	0	2002-12-04	0.193961	15.1014	16.9698	20.0009	22.2358	28.3657	31.6774	27.7369	25.4444	26.0166	23.3798	22.6116
1	1	0	0	2002-12-05	0.193961	14.609	16.2477	18.9681	20.8953	26.8606	31.1931	27.6014	25.3938	26.0548	23.3155	22.5994
1	1	0	0	2002-12-06	0.193961	14.0312	15.6148	18.0346	19.7201	25.4242	30.2241	27.4748	25.3509	26.0627	23.2543	22.5878
1	1	0	0	2002-12-07	0.193961	13.5715	15.0879	17.2364	18.6287	24.0898	28.7379	27.3698	25.1527	26.0212	23.1974	22.5789
1	1	0	0	2002-12-08	0.193961	13.2414	14.6325	16.5191	17.69	22.8072	27.2595	27.2804	24.9649	25.6049	23.1439	22.5721
1	1	0	0	2002-12-09	0.193961	12.9596	14.2093	15.8715	16.7831	21.6181	25.8576	27.2069	24.7757	25.2134	23.0914	22.564
1	1	0	0	2002-12-10	0.193961	13.7165	14.3415	15.6423	16.1977	20.697	24.7294	27.2479	24.6806	24.907	23.0801	22.5872
1	1	0	0	2002-12-11	0.193961	15.0249	14.7068	15.6565	15.8247	20.0185	23.7506	27.3595	24.6506	24.6526	23.0948	22.6287
1	1	0	0	2002-12-12	0.193961	16.2692	15.0991	15.72	15.5371	19.3943	22.8459	27.4802	24.6358	24.4242	23.1112	22.6695
1	1	0	0	2002-12-13	0.193961	17.3497	15.4743	15.7765	15.2692	18.8594	21.9571	27.5944	24.6222	24.2142	23.1238	22.7051
1	1	0	0	2002-12-14	0.193961	18.3504	15.8338	15.828	15.0337	18.334	21.1331	27.6941	24.6098	24.0212	23.1329	22.7172
1	1	0	0	2002-12-15	0.193961	18.2919	16.183	15.8966	14.8472	17.854	20.3558	27.7571	24.5981	23.8266	23.1416	22.7413
1	1	0	0	2002-12-16	0.193961	17.5935	16.4879	15.9073	14.6832	17.4159	19.6739	27.4998	24.5898	23.6462	23.1501	22.7499
1	1	0	0	2002-12-17	0.193961	16.8001	16.7134	15.9044	14.5326	17.0272	19.0215	27.1747	24.5822	23.4764	23.1563	22.7514
1	1	0	0	2002-12-18	0.193961	16.0797	16.8935	15.9145	14.3949	16.6688	18.4558	26.7908	24.5773	23.3186	23.1599	22.7456
1	1	0	0	2002-12-19	0.193961	22.0103	20.3592	18.131	15.9161	17.6665	19.0063	27.1619	25.125	23.5344	23.4374	22.8783
1	1	0	0	2002-12-20	0.193961	29.4984	24.0739	20.8598	17.8396	19.0149	19.8544	27.7488	25.7055	23.8458	23.7767	23.0602
1	1	0	0	2002-12-21	0.193961	36.6341	27.2925	23.4416	19.6315	20.3109	20.6785	27.9632	26.256	24.1441	24.0988	23.2301
1	1	0	0	2002-12-22	0.193961	43.5206	30.339	25.8874	21.351	21.5676	21.5024	27.7877	26.7887	24.4372	24.4072	23.3909
1	1	0	0	2002-12-23	0.193961	49.7027	33.07	28.0682	22.904	22.6939	22.2341	27.5291	27.2669	24.6977	24.6842	23.5297
1	1	0	0	2002-12-24	0.193961	48.8643	35.616	30.0992	24.3569	23.7432	22.9258	27.2715	27.7195	24.9438	24.9415	23.6528
1	1	0	0	2002-12-25	0.193961	46.5271	38.1915	31.7966	25.8191	24.8146	23.6599	27.0852	28.1746	25.196	25.197	23.7755
1	1	0	0	2002-12-26	0.193961	44.3463	40.6689	33.2154	27.2103	25.812	24.3764	26.9056	28.613	25.4391	25.4417	23.8917
1	1	0	0	2002-12-27	0.193961	41.9618	42.92	34.4517	28.4486	26.7106	25.0262	26.7145	29.0126	25.6409	25.6635	23.9907
1	1	0	0	2002-12-28	0.193961	40.1655	45.1128	35.6735	29.6351	27.5938	25.6654	26.5292	29.4038	25.8361	25.8779	24.0879
1	1	0	0	2002-12-29	0.193961	38.3608	43.7913	36.7691	30.7071	28.3951	26.2391	26.3451	29.7525	26.0108	26.0711	24.1686
1	1	0	0	2002-12-30	0.193961	36.2045	41.5446	37.7675	31.4411	29.1337	26.7726	26.1597	30.0492	26.162	26.2471	24.2358
1	1	0	0	2002-12-31	0.193961	33.9308	39.3173	38.6612	31.9368	29.7919	27.2248	26.003	30.0797	26.2952	26.4056	24.2901
1	1	0	0	2003-01-01	0.193961	31.8715	37.0954	39.4754	32.3491	30.3706	27.6304	25.8395	30.0394	26.4079	26.5488	24.3366
1	1	0	0	2003-01-02	0.193961	30.017	35.27	40.3192	32.8019	30.949	28.0572	25.7436	29.9625	26.5256	26.6926	24.3846
1	1	0	0	2003-01-03	0.193961	28.547	33.6326	38.9482	33.2562	31.5126	28.48	25.6536	29.898	26.6364	26.8311	24.4189
1	1	0	0	2003-01-04	0.193961	27.2038	31.8829	37.0026	33.6691	31.8311	28.8716	25.5705	29.8519	26.7331	26.9576	24.4458
1	1	0	0	2003-01-05	0.193961	25.953	30.1206	35.1009	34.0267	31.9775	29.2116	25.486	29.5372	26.8179	27.0486	24.4648
1	1	0	0	2003-01-06	0.193961	24.8322	28.5305	33.246	34.3574	32.0832	29.5071	25.4169	28.9418	26.7842	27.0913	24.4783
1	1	0	0	2003-01-07	0.193961	23.5183	26.9464	31.5911	34.6615	32.1827	29.7701	25.3531	28.3342	26.7466	26.8448	24.4881
1	1	0	0	2003-01-08	0.193961	22.0913	25.4978	30.0238	33.2765	32.2607	30.002	25.2918	27.7491	26.6979	26.6092	24.4925
1	1	0	0	2003-01-09	0.193961	20.7476	24.1545	28.4095	31.4814	32.3223	30.0435	25.2431	27.2058	26.6482	26.3898	24.4918
1	1	0	0	2003-01-10	0.193961	25.9424	26.1265	28.9662	31.3537	33.6473	31.0313	25.9063	27.2103	26.9575	26.4459	24.7011
1	1	0	0	2003-01-11	0.193961	32.3482	28.7689	30.0414	31.5641	35.1928	32.187	26.698	27.3357	27.3329	26.5635	24.9453
1	1	0	0	2003-01-12	0.193961	39.4493	31.6625	31.3524	32.0981	36.8566	33.4533	27.5611	27.5245	27.7459	26.7226	25.2087
1	1	0	0	2003-01-13	0.193961	46.4123	34.4305	32.7076	32.6633	37.1411	34.6788	28.3952	27.7254	28.1462	26.8843	25.4612
1	1	0	0	2003-01-14	0.193961	52.9485	37.0267	33.9907	33.0868	37.0126	35.8196	29.1785	27.9069	28.5186	27.0235	25.6962
1	1	0	0	2003-01-15	0.193961	52.6838	39.4921	35.2174	33.4385	36.8574	36.8797	29.8889	28.0961	28.8665	27.1533	25.9151
1	1	0	0	2003-01-16	0.193961	50.7699	41.7381	36.3411	33.7663	36.6428	37.8487	30.534	28.2544	29.1844	27.2681	26.1138
1	1	0	0	2003-01-17	0.193961	47.7238	43.765	37.2544	33.9875	36.4607	38.7272	31.1229	28.4108	29.474	27.3694	26.2924
1	1	0	0	2003-01-18	0.193961	44.4874	45.6287	38.0212	34.1951	36.2657	38.4251	31.6604	28.535	29.7383	27.4557	26.4539
1	1	0	0	2003-01-19	0.193961	41.3498	47.3282	38.7061	34.3731	35.9768	37.7948	32.1498	28.6439	29.9154	27.5317	26.523
1	1	0	0	2003-01-20	0.193961	38.3338	45.6878	39.3442	34.5389	35.6547	37.1629	32.5892	28.74	30.0717	27.5974	26.6543
1	1	0	0	2003-01-21	0.193961	35.5761	43.3522	39.9225	34.6924	35.3657	36.5246	32.9789	28.8328	30.2141	27.6577	26.7734
1	1	0	0	2003-01-22	0.193961	32.9555	40.5179	40.4002	34.7222	35.0187	35.9361	33.3135	28.9044	30.3367	27.7059	26.8773
1	1	0	0	2003-01-23	0.193961	30.6501	37.7474	40.8742	34.7209	34.7237	35.3894	33.626	28.9768	30.4561	27.7538	26.9737
1	1	0	0	2003-01-24	0.193961	28.5663	35.1369	41.3121	34.7137	34.4493	34.8013	33.7998	29.05	30.5636	27.7959	27.0606
1	1	0	0	2003-01-25	0.193961	26.6335	32.6628	39.5745	34.709	34.1953	34.2108	33.879	29.1129	30.659	27.8307	27.1382
1	1	0	0	2003-01-26	0.193961	24.8737	30.4036	37.4312	34.7027	33.9661	33.6766	33.9349	29.1707	30.7474	27.8485	27.2088
1	1	0	0	2003-01-27	0.193961	23.919	28.6161	35.2234	34.8224	33.7991	33.2283	34.0434	29.2662	30.8587	27.8828	27.2907
1	1	0	0	2003-01-28	0.193961	23.1684	27.088	33.1261	34.9902	33.6479	32.8573	34.1613	29.3675	30.9674	27.9211	27.371
1	1	0	0	2003-01-29	0.193961	22.6029	25.7634	31.1973	35.1776	33.5291	32.5344	34.2788	29.4728	31.0576	27.9538	27.4473
1	1	0	0	2003-01-30	0.193961	22.1468	24.569	29.3954	33.7601	33.4341	32.2468	34.3849	29.5551	30.9821	27.9817	27.5165
1	1	0	0	2003-01-31	0.193961	21.708	23.4694	27.7434	32.0427	33.3412	31.9826	34.4802	29.6258	30.8671	28.0003	27.5783
1	1	0	0	2003-02-01	0.193961	20.7475	22.512	26.2316	30.1469	33.2449	31.6834	34.562	29.6897	30.7162	28.0137	27.6335
1	1	0	0	2003-02-02	0.193961	19.6967	21.6113	24.8626	28.3113	33.169	31.3823	33.9042	29.9144	30.6821	28.1034	27.7496
1	1	0	0	2003-02-03	0.193961	18.5892	20.7748	23.6103	26.5877	33.0974	31.0987	33.0667	29.9684	30.5568	28.1051	27.7942
1	1	0	0	2003-02-04	0.193961	17.5564	20.0303	22.4698	24.9782	31.7568	30.8474	32.2652	30.0127	30.2632	28.1059	27.8166
1	1	0	0	2003-02-05	0.193961	16.6258	19.3456	21.4265	23.5065	30.1968	30.6149	31.492	30.0443	29.7889	28.0225	27.8044
1	1	0	0	2003-02-06	0.193961	15.7804	18.4427	20.5065	22.1613	28.5111	30.3938	30.7929	30.0652	29.31	27.9391	27.5629
1	1	0	0	2003-02-07	0.193961	17.2933	18.6737	20.4103	21.5127	27.3452	30.5826	30.3964	30.2755	28.9829	27.9497	27.4122
1	1	0	0	2003-02-08	0.193961	18.833	18.8898	20.3659	20.9585	26.2743	30.7797	29.9896	30.3948	28.6864	27.9617	27.276
1	1	0	0	2003-02-09	0.193961	20.3534	19.1336	20.3763	20.4831	25.2907	29.9159	29.5993	30.4568	28.4015	27.9777	27.1482
1	1	0	0	2003-02-10	0.193961	27.9806	22.482	22.4623	21.6076	25.6388	29.887	29.9385	31.0202	28.4755	28.2521	27.2365
1	1	0	0	2003-02-11	0.193961	35.6395	25.8887	24.4133	22.8322	26.0944	29.7587	30.2899	31.5893	28.5586	28.5297	27.3381
1	1	0	0	2003-02-12	0.193961	40.8921	29.2715	26.3182	24.0733	26.6261	29.6626	30.6776	32.154	28.6604	28.806	27.4482
1	1	0	0	2003-02-13	0.193961	45.7107	32.4506	28.0685	25.2446	27.1464	29.5733	31.0457	32.6797	28.7518	29.0629	27.5417
1	1	0	0	2003-02-14	0.193961	50.1485	35.4297	29.7104	26.3619	27.6537	29.4933	31.4014	33.1698	28.8512	29.3038	27.6296
1	1	0	0	2003-02-15	0.193961	48.1061	38.2221	31.2617	27.4158	28.1448	29.4429	31.7423	33.629	28.9399	29.5296	27.7114
1	1	0	0	2003-02-16	0.193961	45.6914	40.8443	32.7281	28.2753	28.6416	29.4202	32.0316	34.057	29.0366	29.7411	27.7878
1	1	0	0	2003-02-17	0.193961	42.9641	42.1069	34.0739	29.0221	29.0889	29.4087	32.2795	33.9002	29.1156	29.9366	27.8546
1	1	0	0	2003-02-18	0.193961	40.3473	43.2077	35.3212	29.6807	29.5026	29.4061	32.5061	33.5838	29.1873	30.0686	27.9149
1	1	0	0	2003-02-19	0.193961	37.8962	44.2013	36.4902	30.2992	29.9063	29.4204	32.7283	33.2749	29.2561	30.1895	27.9703
1	1	0	0	2003-02-20	0.193961	35.5951	42.0294	37.5848	30.8875	30.2891	29.4461	32.9382	32.9686	29.3265	30.3027	28.0237
1	1	0	0	2003-02-21	0.193961	37.9157	41.9824	40.1064	32.5671	31.4409	30.2468	33.6313	33.0747	29.6412	30.5947	28.2224
1	1	0	0	2003-02-22	0.193961	40.9258	42.1236	41.9515	34.3293	32.6404	31.1213	34.3722	33.2386	29.981	30.903	28.4356
1	1	0	0	2003-02-23	0.193961	44.9209	42.8126	44.0169	36.2635	33.9661	32.1319	35.1921	33.4499	30.3666	31.2363	28.6715
1	1	0	0	2003-02-24	0.193961	48.7165	43.4852	45.9447	38.0893	35.2202	33.1009	35.2587	33.6391	30.7316	31.5501	28.893
1	1	0	0	2003-02-25	0.193961	52.1725	44.0625	45.6487	39.7742	36.382	33.9959	35.1409	33.8195	31.0685	31.84	29.0862
1	1	0	0	2003-02-26	0.193961	52.5419	45.4074	45.7404	41.7578	37.7996	35.0173	35.086	34.1061	31.4726	32.1789	29.318
1	1	0	0	2003-02-27	0.193961	52.0472	46.6653	45.67	43.0179	39.1105	35.9345	34.9984	34.3792	31.8458	32.4898	29.5321
1	1	0	0	2003-02-28	0.193961	50.541	47.9097	45.6272	44.1906	40.3565	36.7882	34.9246	34.6446	32.2006	32.7709	29.729
1	1	0	0	2003-03-01	0.193961	49.1242	49.0992	45.6034	45.2821	41.5338	37.5972	34.8633	34.9053	32.5251	32.9165	29.9131
1	1	0	0	2003-03-02	0.193961	48.0138	50.2734	45.619	44.7832	42.6602	38.3807	34.8349	35.165	32.8335	33.0263	30.0846
1	1	0	0	2003-03-03	0.193961	45.9272	49.4129	45.8191	44.3297	43.8291	39.2139	34.8865	35.4319	33.1537	33.1212	30.262
1	1	0	0	2003-03-04	0.193961	47.3879	49.8968	47.1441	44.642	45.1293	40.5497	35.3207	35.9492	33.6395	33.3477	30.5354
1	1	0	0	2003-03-05	0.193961	49.0141	49.9565	48.5154	45.0165	46.393	41.8591	35.7761	36.4622	34.112	33.581	30.7986
1	1	0	0	2003-03-06	0.193961	51.518	50.5003	50.1444	45.6245	47.7671	43.2576	36.3282	37.0357	34.6077	33.7105	31.0789
1	1	0	0	2003-03-07	0.193961	54.4255	51.4003	51.8953	46.3631	47.949	44.6807	36.9293	37.6311	35.1031	33.7105	31.2968
1	1	0	0	2003-03-08	0.193961	56.9168	51.6014	52.1526	47.1364	48.0849	46.0703	37.549	38.2153	35.5802	33.6987	31.5079
1	1	0	0	2003-03-09	0.193961	56.6252	52.1843	52.3773	48.0566	48.2757	47.1046	38.2065	38.8269	36.0653	33.712	31.7234
1	1	0	0	2003-03-10	0.193961	56.1043	52.7384	52.244	48.9559	48.4712	48.0708	38.8361	39.4086	36.4669	33.7312	31.9262
2	2	0	0	2002-03-12	0.113867	9.21454	9.44993	10.1085	11.078	12.0021	12.1858	14.2435	16.5709	24.0357	28.9456	25.7954
2	2	0	0	2002-03-13	0.113867	9.16938	9.32794	9.88349	10.7605	11.9075	12.0031	13.8984	16.2516	23.6036	28.6253	25.7808
2	2	0	0	2002-03-14	0.113867	9.13809	9.2251	9.68497	10.4707	11.5943	11.8387	13.573	15.9644	23.1838	28.3232	25.7683
2	2	0	0	2002-03-15	0.113867	8.9802	9.13258	9.50399	10.2101	11.2412	11.6937	13.2776	15.55	22.7764	28.0383	25.7553
2	2	0	0	2002-03-16	0.113867	9.20909	9.22661	9.46377	10.0656	10.9815	11.6275	13.0545	15.2112	22.4154	27.7898	25.7563
2	2	0	0	2002-03-17	0.113867	9.67137	9.44299	9.52372	9.99915	10.7967	11.6136	12.8823	14.9105	22.0828	27.5277	25.7666
2	2	0	0	2002-03-18	0.113867	10.1165	9.64299	9.59073	9.94184	10.6318	11.609	12.7309	14.6371	21.7865	27.2653	25.777
2	2	0	0	2002-03-19	0.113867	10.5215	9.8298	9.65723	9.89402	10.4808	11.4155	12.5622	14.3929	21.515	27.002	25.7821
2	2	0	0	2002-03-20	0.113867	10.8966	9.93839	9.72061	9.85203	10.3475	11.1837	12.3839	14.1762	21.2672	26.7515	25.7829
2	2	0	0	2002-03-21	0.113867	10.8434	10.0262	9.76553	9.80869	10.2212	10.9585	12.2136	13.9779	21.0041	26.4219	25.782
2	2	0	0	2002-03-22	0.113867	10.5319	10.1016	9.80593	9.77574	10.1057	10.7525	12.0597	13.797	20.753	26.1042	25.7809
2	2	0	0	2002-03-23	0.113867	10.2281	10.1723	9.83798	9.75011	9.99904	10.5645	11.922	13.6331	20.5183	25.7878	25.7804
2	2	0	0	2002-03-24	0.113867	9.94169	10.2316	9.86706	9.7283	9.90361	10.3911	11.7962	13.4851	20.306	25.4823	25.7803
2	2	0	0	2002-03-25	0.113867	10.1678	10.5322	10.0148	9.8324	9.91522	10.3175	11.7327	13.396	20.0917	25.2307	25.7976
2	2	0	0	2002-03-26	0.113867	10.3995	10.6215	10.1507	9.92406	9.92682	10.251	11.6397	13.3193	19.8963	25	25.8138
2	2	0	0	2002-03-27	0.113867	10.6301	10.581	10.2778	10.012	9.94665	10.1931	11.5498	13.252	19.6135	24.7904	25.829
2	2	0	0	2002-03-28	0.113867	10.8507	10.5394	10.3984	10.0911	9.97022	10.1409	11.4682	13.0233	19.302	24.5298	25.843
2	2	0	0	2002-03-29	0.113867	11.0591	10.5004	10.5074	10.1651	9.99451	10.0962	11.395	12.8066	18.9419	24.2416	25.8555
2	2	0	0	2002-03-30	0.113867	10.774	10.4709	10.6128	10.2046	10.0207	10.0583	11.3334	12.6114	18.5612	23.9526	25.8681
2	2	0	0	2002-03-31	0.113867	10.5347	10.4671	10.5925	10.2467	10.0462	10.0281	11.2825	12.439	18.1145	23.6783	25.8805
2	2	0	0	2002-04-01	0.113867	10.3061	10.4681	10.4894	10.2849	10.0708	10.0065	11.2389	12.284	17.6724	23.4066	25.8925
2	2	0	0	2002-04-02	0.113867	10.0908	10.4708	10.3899	10.3215	10.0911	9.99033	11.2027	12.1456	17.2609	23.1564	25.9035
2	2	0	0	2002-04-03	0.113867	9.90054	10.4799	10.3005	10.3557	10.1122	9.97883	11.0438	11.9968	16.8876	22.9193	25.914
2	2	0	0	2002-04-04	0.113867	9.70955	10.2418	10.2171	10.387	10.1056	9.96884	10.8616	11.8422	16.5452	22.6919	25.924
2	2	0	0	2002-04-05	0.113867	9.52224	10.0284	10.1522	10.325	10.1018	9.95886	10.6897	11.6982	16.156	22.4481	25.9338
2	2	0	0	2002-04-06	0.113867	9.34656	9.82632	10.0942	10.2037	10.0972	9.95008	10.5332	11.5683	15.8012	22.1061	25.9429
2	2	0	0	2002-04-07	0.113867	9.18451	9.63776	10.0419	10.0885	10.0941	9.94	10.3903	11.4521	15.4728	21.7684	25.9516
2	2	0	0	2002-04-08	0.113867	9.03346	9.46699	9.99771	9.98374	10.0913	9.93229	10.2599	11.3466	15.1303	21.4409	25.9162
2	2	0	0	2002-04-09	0.113867	8.89435	9.30194	9.79261	9.88637	10.0885	9.90378	10.1425	11.2477	14.8398	21.1139	25.6622
2	2	0	0	2002-04-10	0.113867	8.75507	9.13871	9.60401	9.80287	10.011	9.87736	10.0353	11.1308	14.5735	20.8136	25.3871
2	2	0	0	2002-04-11	0.113867	8.76259	9.05463	9.47175	9.76136	9.91547	9.87477	9.95266	10.8521	14.3387	20.4955	25.1315
2	2	0	0	2002-04-12	0.113867	11.1059	10.1452	10.127	10.3079	10.292	10.2628	10.1363	10.9547	14.2554	20.2684	24.9527
2	2	0	0	2002-04-13	0.113867	14.5713	11.8024	11.1684	11.1411	10.9012	10.838	10.4536	11.1601	14.2556	20.0974	24.8261
2	2	0	0	2002-04-14	0.113867	19.2402	14.0673	12.6147	12.1545	11.7572	11.6137	10.9106	11.4754	14.2379	19.9857	24.7536
2	2	0	0	2002-04-15	0.113867	25.0978	16.9264	14.4584	13.4774	12.8619	12.5255	11.5049	11.8983	14.316	19.9429	24.7371
2	2	0	0	2002-04-16	0.113867	31.5886	20.1756	16.5659	15.001	14.127	13.5276	12.193	12.3924	14.4496	19.944	24.7277
2	2	0	0	2002-04-17	0.113867	35.6429	23.3745	18.6444	16.506	15.3749	14.5172	12.875	12.8848	14.5971	19.9692	24.7156
2	2	0	0	2002-04-18	0.113867	38.3413	26.4563	20.6487	17.9616	16.5812	15.4745	13.5354	13.2667	14.7535	20.0049	24.6966
2	2	0	0	2002-04-19	0.113867	39.5086	29.3744	22.5478	19.3382	17.6254	16.3824	14.1618	13.6048	14.9116	20.046	24.6777
2	2	0	0	2002-04-20	0.113867	39.1992	32.1486	24.3507	20.6436	18.6218	17.2514	14.7562	13.9266	15.0691	20.0659	24.5878
2	2	0	0	2002-04-21	0.113867	38.0234	34.8056	26.1249	21.9303	19.6054	18.1095	15.3417	14.2528	15.2345	20.0921	24.5051
2	2	0	0	2002-04-22	0.113867	36.6585	36.1506	27.8024	23.1479	20.5365	18.9223	15.8941	14.565	15.3962	20.1192	24.4146
2	2	0	0	2002-04-23	0.113867	35.2334	36.7873	29.3821	24.2949	21.416	19.6898	16.4156	14.8621	15.5534	20.1519	24.3239
2	2	0	0	2002-04-24	0.113867	33.8852	36.6969	30.878	25.382	22.2476	20.3353	16.8951	15.1481	15.7091	20.1526	24.2517
2	2	0	0	2002-04-25	0.113867	32.6057	35.9025	32.3009	26.4145	23.036	20.9525	17.3519	15.4234	15.8637	20.1604	24.1906
2	2	0	0	2002-04-26	0.113867	31.231	34.6273	33.6145	27.4015	23.7905	21.543	17.788	15.6898	16.0157	20.0959	24.141
2	2	0	0	2002-04-27	0.113867	29.9255	33.2919	34.0757	28.3331	24.5034	22.1013	18.2004	15.9428	16.0493	20.0018	24.0442
2	2	0	0	2002-04-28	0.113867	28.7517	31.9925	34.1088	29.2244	25.1862	22.6386	18.5949	16.1891	16.0839	19.8661	23.921
2	2	0	0	2002-04-29	0.113867	27.6368	30.761	33.6768	30.0677	25.8331	23.1458	18.9681	16.4238	16.1228	19.7073	23.7914
2	2	0	0	2002-04-30	0.113867	26.5768	29.5913	32.794	30.87	26.447	23.6262	19.2816	16.6489	16.168	19.4924	23.668
2	2	0	0	2002-05-01	0.113387	25.4935	28.3623	31.5826	31.5841	27.0198	24.0744	19.546	16.8621	16.2141	19.2729	23.5403
2	2	0	0	2002-05-02	0.113387	24.5437	27.2345	30.3758	31.6926	27.5753	24.5102	19.8034	17.072	16.2671	19.0732	23.4272
2	2	0	0	2002-05-03	0.113387	23.6301	26.1908	29.2051	31.4891	28.1055	24.9268	20.0514	17.2746	16.3068	18.8974	23.3208
2	2	0	0	2002-05-04	0.113387	22.7851	25.2109	28.1024	30.9537	28.6111	25.325	20.289	17.4687	16.3364	18.7402	23.2185
2	2	0	0	2002-05-05	0.113387	21.9964	24.2866	27.0597	30.0946	29.0953	25.7052	20.5209	17.6537	16.3673	18.5434	23.0996
2	2	0	0	2002-05-06	0.113387	21.3549	23.4242	26.0265	29.0257	29.5383	26.0757	20.7485	17.8346	16.4041	18.3699	22.9
2	2	0	0	2002-05-07	0.113387	20.6829	22.6132	25.0507	27.9526	29.4906	26.4266	20.965	18.005	16.4435	18.2113	22.7
2	2	0	0	2002-05-08	0.113387	20.0097	21.8198	24.1305	26.9062	29.1932	26.7562	21.17	18.166	16.4832	18.0368	22.504
2	2	0	0	2002-05-09	0.113387	19.4009	21.0931	23.2743	25.927	28.6433	27.0762	21.315	18.3116	16.5238	17.8989	22.3063
2	2	0	0	2002-05-10	0.113387	18.8323	20.4143	22.4685	25.0028	27.8421	27.3847	21.4578	18.4527	16.5488	17.7763	22.1277
2	2	0	0	2002-05-11	0.113387	18.2626	19.8088	21.7036	24.0854	26.8731	27.659	21.5966	18.5886	16.5731	17.6689	21.9282
2	2	0	0	2002-05-12	0.113387	17.7304	19.2066	20.9856	23.2206	25.9082	27.5306	21.7295	18.7184	16.5988	17.5742	21.7208
2	2	0	0	2002-05-13	0.113387	17.2589	18.6343	20.2994	22.4126	24.9767	27.2042	21.8589	18.8428	16.627	17.4928	21.5187
2	2	0	0	2002-05-14	0.113387	16.7769	18.0889	19.6544	21.6498	24.0969	26.6656	21.982	18.9614	16.6577	17.3448	21.3217
2	2	0	0	2002-05-15	0.113387	16.3012	17.5667	19.0433	20.9267	23.2625	25.9187	22.0986	19.0438	16.6905	17.2167	21.1381
2	2	0	0	2002-05-16	0.113387	15.8447	17.0537	18.4875	20.2389	22.4374	25.035	22.212	19.1031	16.7255	17.0959	20.9622
2	2	0	0	2002-05-17	0.113387	15.4276	16.579	17.947	19.5962	21.662	24.1614	22.3224	19.1611	16.7625	16.9882	20.8076
2	2	0	0	2002-05-18	0.113387	15.0171	16.138	17.4286	18.9789	20.9334	23.3168	22.4274	19.2173	16.7356	16.8942	20.6673
2	2	0	0	2002-05-19	0.113387	14.6279	15.7024	16.9352	18.3977	20.2455	22.5187	22.5284	19.2723	16.695	16.8134	20.5405
2	2	0	0	2002-05-20	0.113387	14.2636	15.2825	16.4656	17.8484	19.5941	21.7627	22.6254	19.3288	16.6575	16.7426	20.4053
2	2	0	0	2002-05-21	0.113387	13.9113	14.878	16.0063	17.3434	18.9734	21.0164	22.7191	19.3847	16.6261	16.68	20.277
2	2	0	0	2002-05-22	0.113387	13.5724	14.4999	15.5768	16.8533	18.3913	20.3138	22.81	19.4397	16.6001	16.6255	20.1582
2	2	0	0	2002-05-23	0.113387	13.2727	14.1449	15.1829	16.3896	17.8377	19.6567	22.8984	19.495	16.5792	16.5792	20.0528
2	2	0	0	2002-05-24	0.113387	12.982	13.805	14.7956	15.9469	17.3146	19.0349	22.9826	19.5068	16.5626	16.5406	19.929
2	2	0	0	2002-05-25	0.113387	12.7011	13.4824	14.422	15.5246	16.8189	18.4452	23.0638	19.5206	16.5496	16.509	19.8174
2	2	0	0	2002-05-26	0.113387	12.4299	13.1706	14.062	15.1122	16.3608	17.8829	23.1266	19.5347	16.5397	16.4825	19.6533
2	2	0	0	2002-05-27	0.113387	12.1648	12.8687	13.7216	14.7238	15.9156	17.3536	22.9277	19.5491	16.532	16.3754	19.4721
2	2	0	0	2002-05-28	0.113387	14.4825	13.8776	14.2575	15.0079	16.0082	17.2785	22.8886	19.7802	16.6711	16.3826	19.3486
2	2	0	0	2002-05-29	0.113387	16.7363	14.8592	14.7821	15.2808	16.1048	17.218	22.7044	20.0037	16.8074	16.3967	19.2095
2	2	0	0	2002-05-30	0.113387	18.8994	15.8002	15.2881	15.5414	16.1995	17.1657	22.375	20.2176	16.94	16.4174	19.0271
2	2	0	0	2002-05-31	0.113387	20.9752	16.7026	15.7722	15.7903	16.2848	17.1298	21.9477	20.4236	17.0702	16.4431	18.8443
2	2	0	0	2002-06-01	0.113387	22.9043	17.5345	16.2138	16.0173	16.3599	17.0804	21.5122	20.617	17.1936	16.4705	18.6747
2	2	0	0	2002-06-02	0.113387	22.4108	18.4467	16.722	16.2958	16.4884	17.0753	21.1187	20.8232	17.3271	16.4989	18.5329
2	2	0	0	2002-06-03	0.113387	22.0563	19.3964	17.2583	16.6006	16.6359	17.0967	20.7652	21.0324	17.4636	16.5266	18.5603
2	2	0	0	2002-06-04	0.113387	21.7888	20.3442	17.7966	16.9133	16.7909	17.1311	20.4406	21.2402	17.5984	16.5582	18.4096
2	2	0	0	2002-06-05	0.113387	21.558	21.2666	18.321	17.2186	16.9438	17.1636	20.1179	21.4413	17.7297	16.594	18.4447
2	2	0	0	2002-06-06	0.113387	21.4209	22.1626	18.83	17.5156	17.098	17.2034	19.8191	21.6367	17.8568	16.6335	18.3258
2	2	0	0	2002-06-07	0.113387	21.1037	21.7572	19.3324	17.8174	17.2573	17.2576	19.5486	21.8286	17.9819	16.6768	18.197
2	2	0	0	2002-06-08	0.113387	20.7225	21.3894	19.8384	18.1243	17.425	17.317	19.3027	22.0182	18.0989	16.7222	18.0986
2	2	0	0	2002-06-09	0.113387	20.3396	21.0642	20.3426	18.4322	17.5985	17.3823	19.0776	22.2052	18.2146	16.7572	18.0135
2	2	0	0	2002-06-10	0.113387	19.9705	20.7642	20.8346	18.7334	17.769	17.4483	18.8667	22.3754	18.3276	16.792	17.9409
2	2	0	0	2002-06-11	0.113227	19.6357	20.5283	21.3203	19.0314	17.9396	17.521	18.6758	22.3475	18.4379	16.8293	17.8796
2	2	0	0	2002-06-12	0.113227	19.3035	20.2036	20.9393	19.3251	18.1146	17.5983	18.4988	22.2229	18.5468	16.8698	17.83
2	2	0	0	2002-06-13	0.113227	18.9365	19.8294	20.5717	19.6129	18.2867	17.6769	18.336	21.993	18.652	16.9125	17.7273
2	2	0	0	2002-06-14	0.113227	18.5382	19.4389	20.2222	19.8915	18.4534	17.7551	18.1845	21.6586	18.733	16.9567	17.6404
2	2	0	0	2002-06-15	0.113227	18.1445	19.0576	19.891	20.162	18.6156	17.8316	18.0502	21.2551	18.7982	17.002	17.5591
2	2	0	0	2002-06-16	0.113227	17.7302	18.6829	19.5956	20.4228	18.7712	17.9047	17.9188	20.8547	18.8611	17.0481	17.4876
2	2	0	0	2002-06-17	0.112827	17.2999	18.3017	19.2357	20.0294	18.9201	17.9788	17.7954	20.4695	18.9234	17.0464	17.4272
2	2	0	0	2002-06-18	0.112827	16.8737	17.9051	18.8441	19.6472	19.0651	18.0513	17.6792	20.1067	18.9842	17.0341	17.3771
2	2	0	0	2002-06-19	0.112827	16.476	17.5071	18.4513	19.2856	19.2084	18.1238	17.5711	19.765	19.046	17.0241	17.3349
2	2	0	0	2002-06-20	0.112827	16.0884	17.1164	18.0678	18.9403	19.3473	18.1944	17.4651	19.4271	19.1069	17.0182	17.299
2	2	0	0	2002-06-21	0.112827	16.3849	17.0576	17.9169	18.7929	19.6152	18.3735	17.4413	19.1653	19.2032	17.0435	17.2913
2	2	0	0	2002-06-22	0.112827	16.6967	16.9983	17.7666	18.601	19.3629	18.5495	17.4273	18.9248	19.2987	17.0718	17.2894
2	2	0	0	2002-06-23	0.112827	17.0274	16.9505	17.6125	18.39	19.1233	18.7255	17.4155	18.7019	19.3652	17.1033	17.2937
2	2	0	0	2002-06-24	0.112827	17.3445	16.9102	17.4529	18.1746	18.8974	18.8977	17.4058	18.4932	19.4319	17.1366	17.303
2	2	0	0	2002-06-25	0.112827	17.6523	16.8703	17.2951	17.9639	18.6828	19.0648	17.3972	18.2956	19.4969	17.171	17.3151
2	2	0	0	2002-06-26	0.112827	17.3316	16.8583	17.1489	17.7706	18.5006	19.2346	17.397	18.1159	19.5632	17.2076	17.2634
2	2	0	0	2002-06-27	0.112827	17.0309	16.8638	17.0092	17.5827	18.2869	18.9742	17.402	17.9481	19.6304	17.2468	17.217
2	2	0	0	2002-06-28	0.112827	16.7433	16.8853	16.8815	17.3952	18.0607	18.7266	17.4118	17.7941	19.6969	17.2873	17.1788
2	2	0	0	2002-06-29	0.112827	16.4732	16.9088	16.7646	17.208	17.8343	18.4934	17.4249	17.6513	19.7617	17.3284	17.1488
2	2	0	0	2002-06-30	0.112827	16.2255	16.9388	16.6554	17.0277	17.6162	18.2731	17.4395	17.5232	19.8257	17.371	17.1252
2	2	0	0	2002-07-01	0.112827	16.0674	16.6995	16.5946	16.8786	17.43	18.0952	17.4681	17.4094	19.8952	17.4191	17.1116
2	2	0	0	2002-07-02	0.112827	15.8925	16.4617	16.5401	16.73	17.2447	17.8879	17.4992	17.3033	19.9633	17.4672	17.0928
2	2	0	0	2002-07-03	0.112827	15.7162	16.2298	16.4956	16.5901	17.0594	17.6699	17.5328	17.205	20.0306	17.5152	17.0713
2	2	0	0	2002-07-04	0.112827	15.5434	16.0083	16.4537	16.4593	16.875	17.4525	17.5671	17.1135	20.0962	17.5619	17.0532
2	2	0	0	2002-07-05	0.112827	15.3944	15.8099	16.4241	16.3402	16.7011	17.2459	17.6043	17.0265	20.1617	17.6089	17.0405
2	2	0	0	2002-07-06	0.112827	15.1316	15.5995	16.1769	16.2289	16.5292	17.0469	17.6413	16.9469	20.2256	17.6542	17.0323
2	2	0	0	2002-07-07	0.112827	14.8723	15.3824	15.9319	16.1231	16.3585	16.8492	17.677	16.8752	20.2877	17.6989	17.0274
2	2	0	0	2002-07-08	0.112827	14.6233	15.1697	15.6942	16.0275	16.1968	16.6535	17.7151	16.8069	20.3488	17.7375	17.0245
2	2	0	0	2002-07-09	0.112827	14.3726	14.958	15.463	15.9334	16.0419	16.458	17.7528	16.7419	20.4083	17.7755	17.0133
2	2	0	0	2002-07-10	0.112827	14.0869	14.7407	15.2356	15.8398	15.8894	16.2654	17.7883	16.6786	20.4576	17.8119	17.0027
2	2	0	0	2002-07-11	0.112827	13.7747	14.4531	14.9912	15.5763	15.738	16.0701	17.8201	16.6172	20.3739	17.8461	16.9935
2	2	0	0	2002-07-12	0.112027	13.4732	14.1728	14.746	15.3173	15.5931	15.8776	17.5648	16.5597	20.2267	17.8795	16.9874
2	2	0	0	2002-07-13	0.112027	13.1763	13.8998	14.5052	15.0648	15.4573	15.6933	17.3195	16.5068	20.012	17.9124	16.9848
2	2	0	0	2002-07-14	0.112027	12.8961	13.6343	14.2707	14.8213	15.326	15.5176	17.0858	16.4579	19.7304	17.9292	16.985
2	2	0	0	2002-07-15	0.112027	12.6526	13.3698	14.0447	14.5898	15.2023	15.35	16.8637	16.4126	19.4056	17.9361	16.9877
2	2	0	0	2002-07-16	0.112027	12.4665	13.1206	13.7909	14.36	14.9543	15.1928	16.6604	16.3704	19.0863	17.944	16.9931
2	2	0	0	2002-07-17	0.111427	12.2838	12.8785	13.5431	14.1304	14.7106	15.0416	16.4396	16.3319	18.7791	17.9529	16.9615
2	2	0	0	2002-07-18	0.111427	12.2116	12.6939	13.337	13.9318	14.4942	14.9163	16.2257	16.3055	18.4955	17.9672	16.9266
2	2	0	0	2002-07-19	0.111427	12.4724	12.6843	13.247	13.8211	14.3515	14.8504	16.0507	16.3088	18.2457	17.9971	16.946
2	2	0	0	2002-07-20	0.111427	12.8425	12.7476	13.1941	13.7442	14.2404	14.8091	15.8953	16.3234	18.0066	18.0323	16.933
2	2	0	0	2002-07-21	0.111427	13.3338	12.9001	13.1917	13.6766	14.1548	14.6842	15.7618	16.3506	17.7905	18.0735	16.9282
2	2	0	0	2002-07-22	0.111427	16.4674	14.3755	14.0748	13.9633	14.5979	15.0033	15.9245	16.5982	17.7365	18.2248	17.0147
2	2	0	0	2002-07-23	0.111427	19.4454	15.8292	14.9443	14.2263	15.0346	15.3194	16.0838	16.8441	17.6932	18.3537	17.1031
2	2	0	0	2002-07-24	0.111427	22.0009	17.2368	15.79	14.4716	15.457	15.6263	16.2353	17.0838	17.6565	18.4805	17.1912
2	2	0	0	2002-07-25	0.111427	24.3427	18.5927	16.6127	14.7073	15.864	15.9241	16.3811	17.3162	17.6239	18.6037	17.2783
2	2	0	0	2002-07-26	0.111427	26.4275	19.881	17.4093	14.9283	16.227	16.2002	16.5164	17.5391	17.5961	18.7224	17.3628
2	2	0	0	2002-07-27	0.111427	25.8365	21.1519	18.1961	15.4429	16.5867	16.4709	16.6503	17.5443	17.5745	18.8405	17.4484
2	2	0	0	2002-07-28	0.111427	25.2388	22.342	18.9652	15.9457	16.9392	16.7354	16.784	17.5526	17.56	18.9565	17.5334
2	2	0	0	2002-07-29	0.111427	24.6251	23.313	19.6996	16.4262	17.2734	16.9851	16.9116	17.561	17.5481	19.0676	17.6163
2	2	0	0	2002-07-30	0.111427	24.06	24.2013	20.4148	16.9021	17.597	17.2298	17.0384	17.5733	17.5443	19.1768	17.6993
2	2	0	0	2002-07-31	0.111427	23.4692	24.9485	21.0768	17.3519	17.8944	17.4338	17.1541	17.5863	17.5365	19.28	17.7787
2	2	0	0	2002-08-01	0.11076	22.9033	24.3698	21.7356	17.8003	18.1928	17.6395	17.273	17.5853	17.5342	19.3824	17.8583
2	2	0	0	2002-08-02	0.10956	22.382	23.8104	22.3555	18.2472	18.4909	17.8462	17.396	17.5799	17.5377	19.4845	17.938
2	2	0	0	2002-08-03	0.10956	21.9359	23.2805	22.8539	18.6862	18.7861	18.0505	17.5183	17.5732	17.5446	19.5848	18.0162
2	2	0	0	2002-08-04	0.10956	21.4205	22.7404	23.2744	19.0942	19.0636	18.2341	17.6309	17.5618	17.5479	19.6799	18.0905
2	2	0	0	2002-08-05	0.10836	21.0189	22.2441	23.6385	19.4901	19.3432	18.415	17.669	17.5527	17.5551	19.7731	18.163
2	2	0	0	2002-08-06	0.10836	20.9084	21.9058	23.216	19.9565	19.6799	18.6454	17.7409	17.5691	17.5841	19.8772	18.2448
2	2	0	0	2002-08-07	0.10836	20.7357	21.5588	22.7855	20.3782	20.0029	18.865	17.8081	17.5809	17.6117	19.9779	18.3196
2	2	0	0	2002-08-08	0.10836	20.5094	21.2226	22.3568	20.6954	20.3088	19.0731	17.8699	17.5874	17.6378	20.0745	18.3918
2	2	0	0	2002-08-09	0.10836	20.3444	20.8825	21.9416	20.9696	20.6022	19.2773	17.93	17.593	17.6636	20.1625	18.4615
2	2	0	0	2002-08-10	0.10836	20.1441	20.5815	21.5441	21.1926	20.8787	19.4766	17.9816	17.595	17.6892	20.1496	18.5288
2	2	0	0	2002-08-11	0.10836	19.5845	20.2466	21.132	20.7358	21.1401	19.6639	18.0246	17.5926	17.7133	20.086	18.5931
2	2	0	0	2002-08-12	0.10836	19.0457	19.8907	20.7211	20.2782	21.3695	19.8432	18.0638	17.59	17.7378	19.9697	18.6552
2	2	0	0	2002-08-13	0.10324	18.5063	19.5078	20.3173	19.8218	21.5155	20.0083	18.0957	17.5848	17.7604	19.7999	18.4945
2	2	0	0	2002-08-14	0.10324	17.9644	19.1544	19.9099	19.375	21.6265	20.1624	18.1233	17.578	17.7814	19.5948	18.5308
2	2	0	0	2002-08-15	0.10084	17.4341	18.789	19.5324	18.9442	21.6988	20.3047	18.1334	17.5704	17.8007	19.3908	18.5656
2	2	0	0	2002-08-16	0.10084	16.9351	18.2598	19.1427	18.5105	21.2334	20.4391	18.1405	17.5621	17.8199	19.1941	18.5997
2	2	0	0	2002-08-17	0.10084	16.3723	17.709	18.7179	18.0615	20.7548	20.5367	18.1369	17.5482	17.8347	19.0058	18.6306
2	2	0	0	2002-08-18	0.10084	15.797	17.1517	18.2709	17.6148	20.2747	20.5625	18.1241	17.5281	17.8456	18.8249	18.6597
2	2	0	0	2002-08-19	0.10084	15.227	16.5957	17.8453	17.1668	19.8033	20.5599	18.1044	17.5062	17.8544	18.645	18.6873
2	2	0	0	2002-08-20	0.10084	14.703	16.0685	17.427	16.7527	19.3539	20.5328	18.0858	17.4303	17.8635	18.4761	18.7148
2	2	0	0	2002-08-21	0.09964	14.1717	15.5534	16.8971	16.3276	18.9006	20.0566	18.0625	17.3517	17.8698	18.3164	18.7407
2	2	0	0	2002-08-22	0.09964	13.708	15.0402	16.3753	15.893	18.4487	19.5804	18.035	17.2716	17.8752	18.165	18.7486
2	2	0	0	2002-08-23	0.09964	13.3059	14.5514	15.8698	15.4573	18.0109	19.1132	18.0054	17.1916	17.8791	18.0206	18.7566
2	2	0	0	2002-08-24	0.09964	12.9246	14.0758	15.372	15.0428	17.5762	18.6569	17.9753	17.1123	17.8819	17.8821	18.7638
2	2	0	0	2002-08-25	0.09964	12.5308	13.6168	14.8893	14.6306	17.1662	18.2166	17.9476	17.0302	17.8838	17.7514	18.7708
2	2	0	0	2002-08-26	0.09964	12.1692	13.1704	14.4253	14.1429	16.7538	17.7786	17.9178	16.9466	17.7413	17.6256	18.7777
2	2	0	0	2002-08-27	0.09924	11.8314	12.7697	13.9706	13.667	16.3386	17.3458	17.8857	16.8623	17.6026	17.5064	18.7838
2	2	0	0	2002-08-28	0.09924	11.4975	12.4017	13.5335	13.2043	15.9232	16.9253	17.85	16.7769	17.468	17.3924	18.7886
2	2	0	0	2002-08-29	0.09924	11.1838	12.0542	13.1118	12.7526	15.5289	16.5108	17.8122	16.692	17.338	17.2859	18.7931
2	2	0	0	2002-08-30	0.09924	10.8835	11.7071	12.7058	12.3155	15.139	16.119	17.7717	16.5982	17.2161	17.1821	18.7973
2	2	0	0	2002-08-31	0.09924	10.61	11.3896	12.317	11.8991	14.6941	15.7298	17.7318	16.5064	17.0858	17.0831	18.8014
2	2	0	0	2002-09-01	0.09924	10.3567	11.094	11.9653	11.4948	14.2628	15.3416	17.6795	16.4156	16.9526	16.9886	18.8054
2	2	0	0	2002-09-02	0.09924	10.1487	10.8232	11.6507	11.1149	13.8511	14.9608	17.5918	16.3273	16.8213	16.8987	18.8095
2	2	0	0	2002-09-03	0.09924	9.97121	10.5776	11.3599	10.7544	13.4542	14.6026	17.4933	16.2402	16.6943	16.8116	18.8139
2	2	0	0	2002-09-04	0.09924	9.80939	10.3465	11.0745	10.4093	13.0721	14.2508	17.38	16.1546	16.5709	16.7291	18.818
2	2	0	0	2002-09-05	0.09924	9.6483	10.1291	10.8091	10.0775	12.7069	13.8531	16.9741	16.071	16.4493	16.6514	18.8219
2	2	0	0	2002-09-06	0.09452	9.49009	9.92339	10.5594	9.7742	12.3517	13.4673	16.5733	15.9879	16.3286	16.5757	18.8253
2	2	0	0	2002-09-07	0.09452	9.88663	10.0177	10.511	9.63738	12.1271	13.1903	16.2458	15.9535	16.2405	16.526	18.8472
2	2	0	0	2002-09-08	0.09452	10.9661	10.4687	10.7071	9.68912	12.0546	13.0396	16.0069	15.9801	16.194	16.5076	18.8874
2	2	0	0	2002-09-09	0.09452	18.4259	14.1177	13.0396	11.34	13.2705	13.9644	16.491	16.5423	16.5037	16.758	19.0621
2	2	0	0	2002-09-10	0.09452	25.4123	17.5303	15.2235	12.8876	14.4023	14.8245	16.927	17.0659	16.7887	16.9911	19.1831
2	2	0	0	2002-09-11	0.09452	31.839	20.6645	17.2286	14.3069	15.445	15.5996	17.3067	17.5431	17.0454	17.2033	19.2452
2	2	0	0	2002-09-12	0.09412	37.3289	23.6076	19.1214	15.6431	16.4335	16.3274	17.6573	17.9896	17.2845	17.4021	19.255
2	2	0	0	2002-09-13	0.09412	41.6647	26.3162	20.8679	16.8745	17.3424	16.9898	17.9631	18.3979	17.5008	17.5835	19.2233
2	2	0	0	2002-09-14	0.09412	39.1705	28.7991	22.4693	18.0005	18.1644	17.5874	18.2358	18.7678	17.6949	17.7474	19.1797
2	2	0	0	2002-09-15	0.09412	36.7379	31.0758	23.9332	19.0302	18.9159	18.1251	18.4643	19.1039	17.8686	17.8962	19.1298
2	2	0	0	2002-09-16	0.09412	34.7848	33.3113	25.3709	20.045	19.6602	18.6682	18.6847	19.4241	18.0403	18.0432	19.0877
2	2	0	0	2002-09-17	0.09412	32.8688	35.0986	26.6947	20.9858	20.346	19.1727	18.872	19.6893	18.1951	18.1773	19.044
2	2	0	0	2002-09-18	0.09412	31.1291	36.3961	27.9201	21.8606	20.9831	19.64	19.0418	19.9217	18.3363	18.3009	18.9935
2	2	0	0	2002-09-19	0.09412	29.5672	34.3699	29.0551	22.6714	21.5716	20.0649	19.1855	20.1206	18.4273	18.4139	18.9433
2	2	0	0	2002-09-20	0.09412	28.228	32.4848	30.1267	23.4346	22.1276	20.4678	19.2776	20.0838	18.5092	18.5193	18.8963
2	2	0	0	2002-09-21	0.09412	26.7078	30.745	31.1103	24.1329	22.6354	20.8348	19.3483	20.0293	18.5782	18.6151	18.8485
2	2	0	0	2002-09-22	0.09412	25.323	29.0968	31.841	24.7798	23.1113	21.1757	19.4071	19.9662	18.6385	18.7033	18.8012
2	2	0	0	2002-09-23	0.09412	23.9731	27.5504	32.2565	25.3609	23.5409	21.4813	19.4449	19.8908	18.6877	18.7817	18.7515
2	2	0	0	2002-09-24	0.09332	22.7157	26.1415	30.4864	25.8981	23.9383	21.7624	19.4713	19.8112	18.7265	18.8534	18.703
2	2	0	0	2002-09-25	0.09332	21.4288	24.8278	28.7984	26.3794	24.2912	22.0109	19.4824	19.7165	18.7537	18.8087	18.6521
2	2	0	0	2002-09-26	0.09332	20.2482	23.4774	27.2448	26.8222	24.6134	22.2375	19.4818	19.6134	18.7727	18.7612	18.6021
2	2	0	0	2002-09-27	0.093	19.1438	22.2337	25.7796	27.094	24.9102	22.4501	19.4779	19.5094	18.7869	18.7135	18.5533
2	2	0	0	2002-09-28	0.093	18.7106	21.3414	24.6037	27.297	25.2884	22.7358	19.5278	19.445	18.8255	18.6874	18.5254
2	2	0	0	2002-09-29	0.093	18.3769	20.5465	23.5534	25.8858	25.6517	23.0113	19.5761	19.3869	18.8547	18.6648	18.4975
2	2	0	0	2002-09-30	0.093	18.1193	19.7734	22.5915	24.5562	25.9851	23.2625	19.614	19.3178	18.8771	18.6299	18.4684
2	2	0	0	2002-10-01	0.093	18.0258	19.1365	21.6602	23.3688	26.3205	23.5156	19.6655	19.2503	18.9013	18.5934	18.4435
2	2	0	0	2002-10-02	0.093	17.9619	18.5528	20.81	22.2522	26.5258	23.7523	19.7184	19.1784	18.9212	18.554	18.4189
2	2	0	0	2002-10-03	0.0934	17.4913	18.1009	20.0581	21.2532	26.5938	23.9892	19.7794	19.1176	18.942	18.518	18.3967
2	2	0	0	2002-10-04	0.0934	17.0196	17.6983	19.3709	20.3475	25.3706	24.213	19.8335	19.0537	18.9597	18.4815	18.3753
2	2	0	0	2002-10-05	0.0934	16.6922	17.4058	18.7464	19.5443	24.2413	24.4366	19.894	18.9665	18.9784	18.446	18.3578
2	2	0	0	2002-10-06	0.0964667	16.3198	17.1728	18.1975	18.7529	23.2169	24.6538	19.9558	18.8824	18.9953	18.4098	18.3309
2	2	0	0	2002-10-07	0.0969467	15.9296	16.9458	17.6784	18.0175	22.2456	24.7595	20.01	18.7966	19.0077	18.3703	18.3123
2	2	0	0	2002-10-08	0.0969467	17.6706	17.581	17.9575	17.8889	21.7946	25.1065	20.3067	18.8948	19.1412	18.4221	18.367
2	2	0	0	2002-10-09	0.0969467	19.3659	18.1927	18.2541	17.7973	21.4091	24.3696	20.593	18.9887	19.2702	18.4702	18.4199
2	2	0	0	2002-10-10	0.0969467	21.0203	18.8562	18.6106	17.7425	21.0974	23.7045	20.8775	19.0861	19.3976	18.5175	18.4734
2	2	0	0	2002-10-11	0.0969467	22.5029	19.4115	18.9495	17.7016	20.7608	23.0978	21.1414	19.1704	19.5136	18.5585	18.5218
2	2	0	0	2002-10-12	0.0969467	23.8277	19.8785	19.2397	17.6434	20.4371	22.5093	21.38	19.2401	19.6151	18.5909	18.5631
2	2	0	0	2002-10-13	0.0969467	22.7855	20.2282	19.3158	17.5921	20.1261	21.9597	21.5958	19.2965	19.704	18.6156	18.5983
2	2	0	0	2002-10-14	0.0969467	21.6886	20.5271	19.358	17.5404	19.8335	21.4556	21.7931	19.3433	19.7825	18.6352	18.6287
2	2	0	0	2002-10-15	0.0969467	20.4728	20.7468	19.3951	17.5038	19.5465	20.9933	21.9733	19.381	19.8526	18.6498	18.6553
2	2	0	0	2002-10-16	0.0969467	19.3238	20.9133	19.3821	17.4708	19.2838	20.5212	22.1378	19.4164	19.9087	18.6604	18.6782
2	2	0	0	2002-10-17	0.0975467	18.2872	21.0575	19.3482	17.4293	19.0301	20.0791	22.2842	19.4476	19.9381	18.6661	18.6973
2	2	0	0	2002-10-18	0.0987467	17.3389	20.0622	19.265	17.2493	18.7994	19.6615	22.4144	19.4725	19.9538	18.6677	18.7126
2	2	0	0	2002-10-19	0.0987467	16.4498	19.0693	19.168	17.0586	18.5802	19.2695	22.5313	19.4889	19.9557	18.6379	18.7245
2	2	0	0	2002-10-20	0.0987467	15.6009	18.0369	19.0314	16.8742	18.3811	18.8888	22.6347	19.5001	19.8044	18.6041	18.7329
2	2	0	0	2002-10-21	0.0989067	15.9123	17.6181	19.2463	16.9424	18.4169	18.722	22.8514	19.6001	19.7124	18.6141	18.7759
2	2	0	0	2002-10-22	0.0989067	16.2814	17.2843	19.4654	17.0092	18.4576	18.5719	22.9948	19.6956	19.6203	18.6218	18.8166
2	2	0	0	2002-10-23	0.0989067	16.6282	16.9836	18.9175	17.0335	18.3829	18.4375	23.0436	19.7811	19.5252	18.625	18.8525
2	2	0	0	2002-10-24	0.0989067	16.9635	16.7066	18.3673	17.0446	18.2975	18.3107	22.3689	19.8583	19.4299	18.6225	18.8845
2	2	0	0	2002-10-25	0.0989067	17.2185	16.4097	17.7641	17.0058	18.2009	18.1874	21.7243	19.9208	19.3256	18.612	18.824
2	2	0	0	2002-10-26	0.104027	16.3578	16.1351	17.198	16.9518	18.0833	18.0738	21.1313	19.9773	19.219	18.5981	18.7634
2	2	0	0	2002-10-27	0.104027	15.4949	15.8881	16.6879	16.9005	17.9642	17.9638	20.5688	20.0287	19.1131	18.5811	18.7032
2	2	0	0	2002-10-28	0.104027	14.6844	15.6563	16.2172	16.2869	17.8215	17.7665	20.0456	20.0729	19.0044	18.5607	18.6429
2	2	0	0	2002-10-29	0.104027	13.9107	15.4371	15.7747	15.6809	17.6757	17.5663	19.562	20.1105	18.8989	18.5326	18.5849
2	2	0	0	2002-10-30	0.104027	13.3379	15.2781	15.3858	15.0853	17.5302	17.3904	19.1241	20.1482	18.7942	18.5055	18.5217
2	2	0	0	2002-10-31	0.104027	13.0783	14.7181	15.1162	14.5957	17.435	17.2491	18.7196	20.2041	18.7021	18.4882	18.4642
2	2	0	0	2002-11-01	0.104027	15.7828	15.6388	15.853	14.8892	17.9348	17.6006	18.6704	20.4982	18.7712	18.5911	18.5029
2	2	0	0	2002-11-02	0.105227	19.1172	16.9008	16.8099	15.3699	18.1108	18.0374	18.711	20.8351	18.8764	18.7158	18.5615
2	2	0	0	2002-11-03	0.105227	22.8959	18.4032	17.9234	15.9826	18.3817	18.5459	18.8208	21.2011	19.0032	18.8562	18.6339
2	2	0	0	2002-11-04	0.105627	26.3929	19.8654	18.9831	16.5652	18.6047	19.0072	18.9202	21.5436	19.0989	18.9855	18.6979
2	2	0	0	2002-11-05	0.105627	29.156	21.1172	19.5307	17.0538	18.7656	19.3886	18.9915	21.8429	19.1699	19.0937	18.7451
2	2	0	0	2002-11-06	0.105627	31.9782	23.8805	21.0853	18.312	19.5649	20.2754	19.4096	22.3391	19.4084	19.3246	18.891
2	2	0	0	2002-11-07	0.107627	36.4006	27.759	23.4008	20.1353	20.834	21.1592	20.0919	22.9546	19.7684	19.6456	19.1091
2	2	0	0	2002-11-08	0.107627	40.4463	31.6709	25.7508	21.9817	22.1332	22.0591	20.7907	23.0361	20.131	19.9675	19.3276
2	2	0	0	2002-11-09	0.107627	44.3081	35.35	28.0129	23.7419	23.3716	22.8884	21.4624	23.1182	20.4724	20.2703	19.5314
2	2	0	0	2002-11-10	0.107627	48.0433	38.5996	30.0926	25.0865	24.5097	23.6453	22.0799	23.1934	20.7809	20.5464	19.7155
2	2	0	0	2002-11-11	0.107627	48.5099	40.2546	32.0972	26.3743	25.6135	24.3926	22.675	23.2724	21.0764	20.8094	19.8906
2	2	0	0	2002-11-12	0.107627	46.4898	41.4358	33.9965	27.5961	26.6604	25.1067	23.1766	23.355	21.3522	21.0548	20.0532
2	2	0	0	2002-11-13	0.107627	44.2173	42.3325	35.8539	28.7954	27.6869	25.814	23.6621	23.4566	21.6191	21.2905	20.2106
2	2	0	0	2002-11-14	0.107627	41.9633	43.1339	37.5532	29.9271	28.6433	26.4696	24.1115	23.5531	21.8627	21.5068	20.3534
2	2	0	0	2002-11-15	0.112347	39.9913	44.0176	39.0638	30.9951	29.3254	27.09	24.5206	23.6274	22.0931	21.704	20.4861
2	2	0	0	2002-11-16	0.112667	37.7378	43.1345	39.4157	31.9352	29.905	27.6344	24.8725	23.6785	22.2954	21.8622	20.5994
2	2	0	0	2002-11-17	0.112667	35.6439	41.0559	39.5053	32.836	30.4638	28.1573	25.1937	23.7314	22.4864	22.0048	20.7053
2	2	0	0	2002-11-18	0.112667	33.2326	38.7256	39.2996	33.6259	30.9408	28.6112	25.4636	23.7621	22.6485	22.1196	20.7722
2	2	0	0	2002-11-19	0.112667	31.1349	36.5483	39.1351	34.3765	31.4265	29.0588	25.7163	23.7955	22.8051	22.118	20.8346
2	2	0	0	2002-11-20	0.112667	29.0775	34.5345	39.0379	34.9949	31.8694	29.284	25.9383	23.8248	22.947	22.1053	20.8876
2	2	0	0	2002-11-21	0.113467	27.3546	32.546	37.8739	34.8283	32.2769	29.4797	26.1416	23.8477	23.0758	22.0852	20.933
2	2	0	0	2002-11-22	0.113467	25.5706	30.6074	35.8954	34.4492	32.641	29.6484	26.0713	23.8644	23.189	22.056	20.9691
2	2	0	0	2002-11-23	0.113467	24.1224	28.6779	33.8589	33.9327	32.9831	29.8042	25.9921	23.8793	23.2925	22.0235	20.9985
2	2	0	0	2002-11-24	0.113467	22.604	26.8694	31.8997	33.429	33.28	29.9564	25.892	23.8937	23.3848	21.9832	21.0203
2	2	0	0	2002-11-25	0.113467	21.1155	25.0967	30.062	32.9848	33.4766	30.0775	25.7842	23.897	23.4628	21.9335	21.0335
2	2	0	0	2002-11-26	0.113867	19.7376	23.5459	28.2764	31.7678	33.0678	30.1873	25.6872	23.897	23.5337	21.8816	21.0418
2	2	0	0	2002-11-27	0.113867	18.5363	22.0537	26.584	29.9833	32.5244	30.2903	25.5991	23.8499	23.5974	21.8258	21.0462
2	2	0	0	2002-11-28	0.113867	17.1092	20.6161	24.9271	28.0986	31.8252	30.3378	25.4833	23.7735	23.6561	21.7718	21.0438
2	2	0	0	2002-11-29	0.113867	16.1308	19.3669	23.3958	26.385	31.2277	30.4219	25.4095	23.7281	23.7091	21.7143	21.0388
2	2	0	0	2002-11-30	0.113867	15.2835	18.1994	21.9314	24.7948	30.7027	30.4446	25.3352	23.6687	23.7541	21.651	21.0296
2	2	0	0	2002-12-01	0.113867	14.7033	17.221	20.7043	23.311	29.613	30.0069	25.2891	23.6252	23.8043	21.5934	21.0244
2	2	0	0	2002-12-02	0.113867	14.2058	16.3711	19.5431	21.9169	28.0854	29.4716	25.2512	23.5762	23.8503	21.6295	21.0171
2	2	0	0	2002-12-03	0.113867	13.7178	15.5719	18.5281	20.5527	26.545	28.8609	25.2149	23.525	23.8908	21.5718	21.0073
2	2	0	0	2002-12-04	0.113867	13.2421	14.8451	17.5363	19.2849	25.0776	28.2822	25.1829	23.4666	23.9264	21.6	20.9951
2	2	0	0	2002-12-05	0.113867	12.8294	14.2149	16.6207	18.0834	23.7234	27.7768	25.0279	23.4042	23.9573	21.5267	20.9805
2	2	0	0	2002-12-06	0.113867	12.3086	13.6648	15.7947	17.0329	22.4317	26.7816	24.8828	23.3503	23.9564	21.4569	20.9662
2	2	0	0	2002-12-07	0.113867	11.9066	13.2149	15.0944	16.0618	21.2358	25.4418	24.7616	23.1222	23.9202	21.3919	20.955
2	2	0	0	2002-12-08	0.113867	11.6214	12.8281	14.4668	15.2291	20.0885	24.1103	24.6564	22.9058	23.5304	21.3307	20.9461
2	2	0	0	2002-12-09	0.113867	11.3796	12.4694	13.9014	14.4253	19.0251	22.8482	24.5691	22.6898	23.1644	21.2714	20.9359
2	2	0	0	2002-12-10	0.113867	12.3392	12.7429	13.8012	13.9781	18.2558	21.8785	24.6164	22.5838	22.8915	21.2605	20.9632
2	2	0	0	2002-12-11	0.113867	13.9013	13.2636	13.9549	13.749	17.7276	21.0633	24.7411	22.5497	22.6726	21.2781	21.0102
2	2	0	0	2002-12-12	0.113867	15.3836	13.8037	14.1491	13.5943	17.2474	20.3134	24.8745	22.5321	22.4776	21.2976	21.0566
2	2	0	0	2002-12-13	0.113867	16.6867	14.3128	14.3258	13.4493	16.842	19.574	24.9979	22.5153	22.2988	21.3128	21.0972
2	2	0	0	2002-12-14	0.113867	17.89	14.7934	14.4878	13.3262	16.4396	18.8888	25.1104	22.5011	22.1349	21.3244	21.1114
2	2	0	0	2002-12-15	0.113867	17.8469	15.2516	14.6556	13.2403	16.0732	18.2406	25.1815	22.487	21.9682	21.3351	21.1395
2	2	0	0	2002-12-16	0.113867	17.0994	15.6589	14.7536	13.1687	15.7404	17.676	24.9225	22.477	21.8141	21.3457	21.1532
2	2	0	0	2002-12-17	0.113867	16.2667	15.9837	14.8362	13.1062	15.4501	17.1368	24.5929	22.4691	21.6698	21.3542	21.1593
2	2	0	0	2002-12-18	0.113867	15.5124	16.258	14.9241	13.0501	15.1833	16.6732	24.2151	22.4637	21.5355	21.3598	21.1585
2	2	0	0	2002-12-19	0.113867	21.1203	19.6637	17.1138	14.5736	16.2063	17.2725	24.5598	22.9873	21.7573	21.627	21.277
2	2	0	0	2002-12-20	0.113867	27.9282	23.0462	19.6887	16.4014	17.4992	18.1018	25.0806	23.5149	22.0536	21.9408	21.4329
2	2	0	0	2002-12-21	0.113867	34.4432	25.9297	22.1317	18.1035	18.7449	18.9103	25.2317	24.0168	22.3384	22.2395	21.5785
2	2	0	0	2002-12-22	0.113867	40.7191	28.6518	24.4405	19.7347	19.9502	19.7145	25.1082	24.5033	22.6177	22.5255	21.7158
2	2	0	0	2002-12-23	0.113867	46.3311	31.0826	26.4954	21.2047	21.0285	20.4283	24.905	24.9377	22.8655	22.7816	21.8327
2	2	0	0	2002-12-24	0.113867	45.2518	33.3468	28.406	22.577	22.0314	21.1008	24.7005	25.3506	23.0989	23.0189	21.935
2	2	0	0	2002-12-25	0.113867	43.0863	35.6667	29.9384	23.9662	23.0602	21.8169	24.5653	25.7686	23.3401	23.2564	22.0385
2	2	0	0	2002-12-26	0.113867	41.0399	37.9005	31.1781	25.2866	24.0123	22.5136	24.4347	26.1719	23.5723	23.4838	22.1362
2	2	0	0	2002-12-27	0.113867	38.7986	39.9182	32.2457	26.4577	24.8687	23.1444	24.2907	26.5388	23.7512	23.6893	22.2177
2	2	0	0	2002-12-28	0.113867	37.1189	41.8863	33.3063	27.5789	25.7087	23.7633	24.1512	26.8987	23.9243	23.8879	22.2983
2	2	0	0	2002-12-29	0.113867	35.4315	40.5012	34.2534	28.59	26.4693	24.3176	24.0101	27.2177	24.0784	24.0664	22.3632
2	2	0	0	2002-12-30	0.113867	33.3711	38.3875	35.1132	29.2242	27.1684	24.8317	23.8649	27.4865	24.2103	24.2286	22.4153
2	2	0	0	2002-12-31	0.113867	31.2017	36.2797	35.879	29.6118	27.791	25.2634	23.7436	27.4833	24.3254	24.3741	22.4556
2	2	0	0	2003-01-01	0.113867	29.2408	34.1782	36.5699	29.9222	28.3357	25.6503	23.6145	27.409	24.4217	24.5054	22.4889
2	2	0	0	2003-01-02	0.113867	27.5917	32.5137	37.3325	30.3052	28.9028	26.0756	23.5598	27.3161	24.5292	24.6422	22.5279
2	2	0	0	2003-01-03	0.113867	26.3056	31.0271	35.9817	30.6939	29.4544	26.4947	23.5087	27.2368	24.6301	24.7737	22.5536
2	2	0	0	2003-01-04	0.113867	25.1333	29.4108	34.1818	31.0458	29.7273	26.8822	23.4618	27.1775	24.7177	24.8936	22.5724
2	2	0	0	2003-01-05	0.113867	24.0474	27.783	32.4137	31.3487	29.8201	27.2198	23.4114	26.8488	24.7942	24.9775	22.5841
2	2	0	0	2003-01-06	0.113867	23.0265	26.2923	30.6724	31.6118	29.8643	27.5037	23.3671	26.3211	24.7369	25.0212	22.589
2	2	0	0	2003-01-07	0.113867	21.7062	24.8075	29.1226	31.8537	29.9068	27.7562	23.3264	25.7808	24.6769	24.792	22.5906
2	2	0	0	2003-01-08	0.113867	20.2825	23.4528	27.6571	30.4845	29.9328	27.9787	23.2863	25.2609	24.6067	24.5731	22.5875
2	2	0	0	2003-01-09	0.113867	18.9462	22.1983	26.134	28.8004	29.9474	27.9834	23.2559	24.7793	24.5376	24.3697	22.5796
2	2	0	0	2003-01-10	0.113867	23.8499	24.1072	26.6836	28.7006	31.1703	28.8779	23.9037	24.8187	24.8132	24.429	22.7728
2	2	0	0	2003-01-11	0.113867	29.9535	26.6486	27.7242	28.9205	32.6011	29.9318	24.6708	24.971	25.1525	24.5463	22.9992
2	2	0	0	2003-01-12	0.113867	36.4787	29.251	28.9093	29.3892	34.1002	31.0547	25.4784	25.1626	25.5161	24.693	23.236
2	2	0	0	2003-01-13	0.113867	42.875	31.7376	30.1384	29.8894	34.2838	32.1429	26.2581	25.3641	25.8689	24.8418	23.4627
2	2	0	0	2003-01-14	0.113867	48.8731	34.0684	31.3015	30.2466	34.136	33.1544	26.9881	25.5459	26.197	24.9699	23.6737
2	2	0	0	2003-01-15	0.113867	48.3968	36.2784	32.4129	30.5379	33.9598	34.0931	27.6466	25.7328	26.5032	25.089	23.8698
2	2	0	0	2003-01-16	0.113867	46.3449	38.3132	33.4291	30.81	33.729	34.947	28.2435	25.8897	26.7824	25.194	24.0474
2	2	0	0	2003-01-17	0.113867	43.4911	40.1451	34.2101	30.9835	33.5317	35.7184	28.787	26.0442	27.0364	25.2865	24.2062
2	2	0	0	2003-01-18	0.113867	40.4493	41.8247	34.8567	31.1469	33.325	35.3665	29.2821	26.1678	27.2678	25.3649	24.3497
2	2	0	0	2003-01-19	0.113867	37.5242	43.3557	35.4316	31.2847	33.0235	34.7537	29.7321	26.2759	27.4154	25.4337	24.4124
2	2	0	0	2003-01-20	0.113867	34.7002	41.7066	35.9654	31.4137	32.6926	34.1369	30.1349	26.3717	27.5444	25.493	24.5281
2	2	0	0	2003-01-21	0.113867	32.1361	39.4	36.4653	31.5331	32.3958	33.5159	30.491	26.4635	27.6618	25.5474	24.6325
2	2	0	0	2003-01-22	0.113867	29.7034	36.7483	36.8741	31.5096	32.0474	32.9457	30.7955	26.5351	27.7612	25.5906	24.7234
2	2	0	0	2003-01-23	0.113867	27.5566	34.1645	37.2804	31.4593	31.7501	32.4164	31.0796	26.6069	27.8596	25.6335	24.8073
2	2	0	0	2003-01-24	0.113867	25.6326	31.7242	37.6549	31.4077	31.4742	31.8432	31.2082	26.6782	27.9477	25.6711	24.8827
2	2	0	0	2003-01-25	0.113867	23.8419	29.4397	35.9639	31.3616	31.2203	31.2701	31.2392	26.7399	28.0256	25.7019	24.95
2	2	0	0	2003-01-26	0.113867	22.2194	27.3358	33.8814	31.3304	30.9912	30.7518	31.2501	26.7964	28.0976	25.7066	25.0109
2	2	0	0	2003-01-27	0.113867	21.4702	25.7433	31.8719	31.4509	30.8231	30.3375	31.3269	26.8983	28.199	25.7325	25.0869
2	2	0	0	2003-01-28	0.113867	21.0053	24.4392	29.9914	31.6401	30.6898	30.012	31.4261	27.0128	28.3034	25.7669	25.1645
2	2	0	0	2003-01-29	0.113867	20.699	23.3209	28.2666	31.8459	30.5872	29.7312	31.5255	27.1295	28.3888	25.7957	25.2382
2	2	0	0	2003-01-30	0.113867	20.4764	22.3162	26.6573	30.5183	30.5058	29.4824	31.6138	27.2208	28.3037	25.8199	25.3047
2	2	0	0	2003-01-31	0.113867	20.2514	21.3918	25.1841	28.9048	30.4359	29.254	31.6928	27.3004	28.1784	25.8348	25.3639
2	2	0	0	2003-02-01	0.113867	19.3954	20.5917	23.8381	27.1799	30.3611	28.9714	31.7588	27.3716	28.0223	25.8448	25.4171
2	2	0	0	2003-02-02	0.113867	18.3547	19.8386	22.6225	25.5095	30.3043	28.6867	31.1184	27.5945	27.9779	25.9271	25.5274
2	2	0	0	2003-02-03	0.113867	17.2598	19.138	21.512	23.9424	30.2501	28.419	30.3395	27.6539	27.8495	25.9258	25.5696
2	2	0	0	2003-02-04	0.113867	16.2409	18.5171	20.5026	22.4805	28.9841	28.181	29.5919	27.7039	27.5505	25.9238	25.589
2	2	0	0	2003-02-05	0.113867	15.3247	17.9467	19.5809	21.1468	27.5101	27.9702	28.8709	27.7408	27.1288	25.8279	25.5825
2	2	0	0	2003-02-06	0.113867	14.4944	17.1035	18.7707	19.9301	25.9641	27.7694	28.2206	27.7668	26.702	25.7329	25.3583
2	2	0	0	2003-02-07	0.113867	16.2097	17.4408	18.8404	19.4472	24.971	28.008	27.891	27.9972	26.4346	25.7398	25.231
2	2	0	0	2003-02-08	0.113867	17.941	17.759	18.9504	19.0466	24.0636	28.2514	27.5457	28.121	26.1942	25.749	25.1169
2	2	0	0	2003-02-09	0.113867	19.6393	18.0986	19.1026	18.7145	23.2339	27.4795	27.2141	28.1827	25.963	25.7624	25.0102
2	2	0	0	2003-02-10	0.113867	26.4068	21.0243	20.9782	19.7151	23.5202	27.3792	27.4943	28.659	26.0313	25.9921	25.084
2	2	0	0	2003-02-11	0.113867	33.2469	24.0293	22.6961	20.8175	23.9147	27.2307	27.7903	29.1462	26.1101	26.2276	25.1718
2	2	0	0	2003-02-12	0.113867	37.5087	27.0176	24.3416	21.9351	24.3805	27.1134	28.1217	29.6314	26.2043	26.4629	25.2673
2	2	0	0	2003-02-13	0.113867	41.3951	29.8255	25.8483	22.9885	24.8373	27.0047	28.437	30.0831	26.2901	26.6818	25.348
2	2	0	0	2003-02-14	0.113867	44.9507	32.4538	27.2611	23.9926	25.2832	26.9064	28.742	30.503	26.3813	26.8865	25.4236
2	2	0	0	2003-02-15	0.113867	43.1086	34.9164	28.5969	24.9385	25.7149	26.8378	29.0349	30.8962	26.4632	27.0788	25.4939
2	2	0	0	2003-02-16	0.113867	40.8894	37.2262	29.8606	25.6717	26.153	26.7964	29.2679	31.261	26.5531	27.2591	25.5597
2	2	0	0	2003-02-17	0.113867	38.386	38.104	31.0179	26.2792	26.5462	26.7674	29.4639	31.07	26.6253	27.4253	25.6165
2	2	0	0	2003-02-18	0.113867	35.9868	38.8443	32.0904	26.8102	26.9094	26.7485	29.6427	30.7543	26.691	27.5306	25.6678
2	2	0	0	2003-02-19	0.113867	33.7428	39.5068	33.0947	27.3089	27.264	26.7462	29.8193	30.4451	26.7541	27.6279	25.7148
2	2	0	0	2003-02-20	0.113867	31.6408	37.5334	34.0342	27.786	27.6002	26.7556	29.992	30.1395	26.8184	27.7174	25.76
2	2	0	0	2003-02-21	0.113867	33.6974	37.4514	36.2614	29.2472	28.5981	27.4632	30.6001	30.2079	27.1023	27.9696	25.9362
2	2	0	0	2003-02-22	0.113867	36.4813	37.592	37.7773	30.8117	29.6413	28.255	31.2637	30.3392	27.4137	28.2416	26.1289
2	2	0	0	2003-02-23	0.113867	40.1696	38.2364	39.4997	32.538	30.8038	29.1722	32.0008	30.5112	27.7675	28.5366	26.3425
2	2	0	0	2003-02-24	0.113867	43.6693	38.8644	41.1001	34.1667	31.903	30.0511	32.0214	30.664	28.1009	28.8143	26.5429
2	2	0	0	2003-02-25	0.113867	46.905	39.4331	40.868	35.6806	32.9313	30.8705	31.8755	30.8151	28.4119	29.0733	26.7105
2	2	0	0	2003-02-26	0.113867	47.2816	40.6465	40.9404	37.4445	34.1759	31.7651	31.8007	31.0547	28.7782	29.3729	26.9103
2	2	0	0	2003-02-27	0.113867	46.7706	41.784	40.8609	38.4515	35.3246	32.5492	31.6963	31.2842	29.1157	29.648	27.0946
2	2	0	0	2003-02-28	0.113867	45.3246	42.9073	40.8126	39.3841	36.4173	33.277	31.607	31.5079	29.4364	29.8937	27.2632
2	2	0	0	2003-03-01	0.113867	43.9713	43.9799	40.7774	40.2494	37.4484	33.9669	31.5306	31.7284	29.7271	30.0021	27.4204
2	2	0	0	2003-03-02	0.113867	42.8658	45.0351	40.7823	39.7919	38.435	34.6375	31.4862	31.9492	30.0036	30.0755	27.5663
2	2	0	0	2003-03-03	0.113867	41.0722	44.3331	40.9983	39.4002	39.4894	35.3769	31.5309	32.1781	30.2976	30.144	27.7226
2	2	0	0	2003-03-04	0.113867	42.4119	44.7469	42.2072	39.6774	40.5611	36.5585	31.9132	32.6262	30.7362	30.328	27.9623
2	2	0	0	2003-03-05	0.113867	43.9024	44.7756	43.4505	40.0124	41.6072	37.7174	32.316	33.0718	31.1627	30.5212	28.1932
2	2	0	0	2003-03-06	0.113867	46.2027	45.2458	44.9288	40.5622	42.7631	38.9606	32.8077	33.574	31.61	30.6077	28.4402
2	2	0	0	2003-03-07	0.113867	48.8618	46.0225	46.5244	41.2304	42.9272	40.2276	33.3447	34.1021	32.0565	30.6077	28.6168
2	2	0	0	2003-03-08	0.113867	51.0072	46.195	46.7734	41.9325	43.046	41.4642	33.8999	34.6207	32.4862	30.5971	28.7882
2	2	0	0	2003-03-09	0.113867	50.7485	46.7363	46.9578	42.7667	43.207	42.3109	34.4892	35.1644	32.923	30.609	28.9637
2	2	0	0	2003-03-10	0.113867	50.2552	47.2473	46.815	43.5825	43.3832	43.1049	35.0538	35.6822	33.2702	30.6271	29.1289
3	3	0	0	2002-03-12	0.0315876	8.18207	8.59256	9.42046	10.6153	11.7243	11.8038	13.9162	16.448	23.0808	26.7738	23.9663
3	3	0	0	2002-03-13	0.0315876	8.08868	8.41794	9.1315	10.2156	11.6253	11.6107	13.5513	16.183	22.6759	26.4774	23.955
3	3	0	0	2002-03-14	0.0315876	8.01376	8.26845	8.87654	9.85182	11.2431	11.4377	13.1727	15.9461	22.2833	26.1989	23.9455
3	3	0	0	2002-03-15	0.0315876	7.85774	8.13342	8.64457	9.52574	10.8021	11.2858	12.8305	15.458	21.9026	25.9372	23.9343
3	3	0	0	2002-03-16	0.0315876	7.936	8.11106	8.50767	9.28437	10.4301	11.1887	12.5501	15.0421	21.5594	25.7044	23.9321
3	3	0	0	2002-03-17	0.0315876	8.12273	8.15241	8.43596	9.09601	10.1168	11.1241	12.3117	14.6583	21.2373	25.4629	23.9349
3	3	0	0	2002-03-18	0.0315876	8.30794	8.19831	8.38126	8.92559	9.83408	11.0724	12.1005	14.3099	20.9513	25.2082	23.9379
3	3	0	0	2002-03-19	0.0315876	8.47282	8.24328	8.33656	8.77557	9.57602	10.7814	11.888	13.9994	20.6904	24.9559	23.9338
3	3	0	0	2002-03-20	0.0315876	8.62406	8.2409	8.29696	8.63943	9.34543	10.439	11.6757	13.7242	20.4529	24.7142	23.9091
3	3	0	0	2002-03-21	0.0315876	8.52505	8.23053	8.24904	8.51203	9.1325	10.1126	11.4756	13.4743	20.166	24.4194	23.8843
3	3	0	0	2002-03-22	0.0315876	8.3107	8.21671	8.20516	8.40463	8.93896	9.81576	11.2955	13.2475	19.8932	24.1366	23.8615
3	3	0	0	2002-03-23	0.0315876	8.10238	8.20518	8.16633	8.31156	8.76096	9.5455	11.1347	13.0427	19.6393	23.8551	23.8414
3	3	0	0	2002-03-24	0.0315876	7.90684	8.18981	8.13113	8.22912	8.60185	9.29781	10.9884	12.8585	19.4107	23.5842	23.8241
3	3	0	0	2002-03-25	0.0315876	8.97443	8.79925	8.48541	8.46634	8.70642	9.28359	10.9852	12.8007	19.1781	23.3961	23.8515
3	3	0	0	2002-03-26	0.0315876	9.96801	9.24652	8.80969	8.67879	8.80322	9.27177	10.9461	12.7537	18.9673	23.2245	23.877
3	3	0	0	2002-03-27	0.0315876	10.901	9.60582	9.11146	8.87909	8.9039	9.26598	10.9063	12.715	18.6802	23.0699	23.9008
3	3	0	0	2002-03-28	0.0315876	11.7709	9.93666	9.39373	9.06746	9.00343	9.26264	10.8717	12.5119	18.354	22.901	23.9223
3	3	0	0	2002-03-29	0.0315876	12.5715	10.2392	9.65043	9.24126	9.0976	9.26344	10.8419	12.2922	17.9864	22.705	23.9418
3	3	0	0	2002-03-30	0.0315876	12.0873	10.5309	9.89525	9.38587	9.19053	9.26991	10.8223	12.0968	17.6016	22.5066	23.961
3	3	0	0	2002-03-31	0.0315876	11.6822	10.8251	10.0585	9.52783	9.27949	9.28305	10.8119	11.9271	17.2088	22.3148	23.9805
3	3	0	0	2002-04-01	0.0315876	11.2968	11.0989	10.1695	9.65779	9.36265	9.30274	10.8058	11.7761	16.824	22.1234	23.9991
3	3	0	0	2002-04-02	0.0315876	10.9352	11.3531	10.2695	9.77913	9.44102	9.3254	10.8047	11.6428	16.467	21.9478	24.0162
3	3	0	0	2002-04-03	0.0315876	10.6168	11.5942	10.3651	9.89199	9.51633	9.35078	10.6426	11.5073	16.1454	21.7819	24.0325
3	3	0	0	2002-04-04	0.0315876	10.2982	11.1927	10.4533	9.99598	9.56837	9.37513	10.4438	11.3701	15.8518	21.6224	24.0479
3	3	0	0	2002-04-05	0.0315876	9.98642	10.8343	10.5456	10.0404	9.61955	9.39731	10.2569	11.2431	15.5553	21.4564	24.063
3	3	0	0	2002-04-06	0.0315876	9.69532	10.4961	10.631	10.0509	9.66527	9.41808	10.0875	11.1294	15.2864	21.1486	24.077
3	3	0	0	2002-04-07	0.0315876	9.42764	10.1815	10.7113	10.059	9.7088	9.43883	9.93407	11.0288	15.0385	20.8416	24.0904
3	3	0	0	2002-04-08	0.0315876	9.1792	9.898	10.7892	10.0686	9.74945	9.46018	9.7949	10.9386	14.7661	20.5345	24.0431
3	3	0	0	2002-04-09	0.0315876	8.95113	9.62465	10.4455	10.0777	9.78701	9.4655	9.67088	10.8503	14.5313	20.2409	23.7939
3	3	0	0	2002-04-10	0.0304162	8.72366	9.35506	10.1308	10.09	9.77707	9.47021	9.5581	10.7422	14.317	19.9725	23.5474
3	3	0	0	2002-04-11	0.0304162	8.56105	9.12819	9.85105	10.1135	9.75296	9.48126	9.461	10.4711	14.1257	19.681	23.3153
3	3	0	0	2002-04-12	0.0304162	10.9241	10.1758	10.429	10.7645	10.232	9.91135	9.65143	10.5896	14.0925	19.4847	23.1642
3	3	0	0	2002-04-13	0.0304162	14.6806	11.9299	11.4922	11.7622	10.991	10.5713	10.0064	10.8331	14.1545	19.3553	23.0734
3	3	0	0	2002-04-14	0.0304162	19.2907	14.1209	12.8466	12.6568	11.9203	11.371	10.4622	11.1569	14.0957	19.2697	23.024
3	3	0	0	2002-04-15	0.0304162	25.5308	17.1272	14.747	13.9808	13.1782	12.4027	11.1043	11.6243	14.1623	19.2702	23.0441
3	3	0	0	2002-04-16	0.0304162	32.296	20.4285	16.8508	15.4623	14.55	13.5101	11.8187	12.1457	14.2756	19.3055	23.0723
3	3	0	0	2002-04-17	0.0304162	36.4396	23.6819	18.9305	16.9317	15.8996	14.6	12.5271	12.6648	14.4066	19.3634	23.0867
3	3	0	0	2002-04-18	0.0304162	38.9461	26.8133	20.9353	18.3557	17.1989	15.6502	13.2123	13.0444	14.5497	19.4303	23.0948
3	3	0	0	2002-04-19	0.0304162	40.2531	29.7718	22.8315	19.6983	18.1761	16.6424	13.8606	13.3693	14.697	19.5003	23.0998
3	3	0	0	2002-04-20	0.0304162	39.6283	32.5799	24.6278	20.9674	19.1104	17.5866	14.4742	13.6782	14.8451	19.5211	23.053
3	3	0	0	2002-04-21	0.0304162	38.3402	35.3184	26.3992	22.2232	20.038	18.5151	15.0785	13.9941	15.0034	19.5486	23.0122
3	3	0	0	2002-04-22	0.0304162	36.8473	36.6439	28.0707	23.4099	20.915	19.391	15.6494	14.2968	15.1588	19.5772	22.9622
3	3	0	0	2002-04-23	0.0304162	35.2944	37.1199	29.6401	24.5249	21.7432	20.2147	16.1868	14.5849	15.3106	19.6117	22.9103
3	3	0	0	2002-04-24	0.0304162	33.8268	37.0399	31.1235	25.5805	22.524	20.7845	16.6848	14.8627	15.462	19.5797	22.8737
3	3	0	0	2002-04-25	0.0304162	32.4379	36.034	32.5329	26.5805	23.2617	21.3319	17.1578	15.1304	15.6131	19.5584	22.8459
3	3	0	0	2002-04-26	0.0304162	30.9491	34.6454	33.8622	27.5369	23.9686	21.8567	17.6082	15.3899	15.7622	19.4743	22.8272
3	3	0	0	2002-04-27	0.0304162	29.5395	33.1942	34.2759	28.438	24.6359	22.3525	18.0329	15.6361	15.7921	19.3536	22.7912
3	3	0	0	2002-04-28	0.0304162	28.2753	31.7848	34.1718	29.299	25.2751	22.8319	18.4381	15.8764	15.8054	19.1978	22.7304
3	3	0	0	2002-04-29	0.0304162	27.0788	30.452	33.7196	30.1122	25.88	23.283	18.8204	16.1051	15.8256	19.0219	22.6619
3	3	0	0	2002-04-30	0.0304162	25.9425	29.1913	32.6704	30.8854	26.453	23.7086	19.1585	16.3244	15.8543	18.8337	22.5936
3	3	0	0	2002-05-01	0.0304162	24.7852	27.8682	31.3583	31.5931	26.9867	24.1048	19.4597	16.5323	15.8856	18.6442	22.5197
3	3	0	0	2002-05-02	0.0304162	23.7735	26.657	30.0534	31.6504	27.5051	24.4922	19.7513	16.7374	15.9259	18.4733	22.4568
3	3	0	0	2002-05-03	0.0304162	22.8026	25.5395	28.7912	31.3295	27.9997	24.863	20.0303	16.9355	15.9592	18.3248	22.3981
3	3	0	0	2002-05-04	0.0304162	21.9068	24.4929	27.6042	30.7664	28.4711	25.2178	20.2963	17.125	15.986	18.1932	22.3414
3	3	0	0	2002-05-05	0.0304162	21.0736	23.5076	26.4844	29.7712	28.9229	25.5563	20.5527	17.3054	16.0142	18.0557	22.2764
3	3	0	0	2002-05-06	0.0304162	20.3967	22.5914	25.3769	28.6181	29.3538	25.8883	20.8026	17.4818	16.049	17.9368	22.0966
3	3	0	0	2002-05-07	0.0304162	19.6895	21.7319	24.3341	27.4623	29.2582	26.2025	21.0388	17.6493	16.0868	17.8295	21.9137
3	3	0	0	2002-05-08	0.0304162	18.983	20.8929	23.3539	26.3391	28.8603	26.497	21.261	17.8072	16.1247	17.6988	21.727
3	3	0	0	2002-05-09	0.0304162	18.3464	20.1261	22.4431	25.2894	28.2821	26.7836	21.3376	17.9531	16.1614	17.5944	21.5495
3	3	0	0	2002-05-10	0.0304162	17.7525	19.4125	21.5887	24.3015	27.3664	27.0611	21.4176	18.0943	16.1819	17.503	21.3902
3	3	0	0	2002-05-11	0.0304162	17.1582	18.7771	20.7805	23.3225	26.3265	27.3212	21.4978	18.2298	16.2021	17.4246	21.209
3	3	0	0	2002-05-12	0.0304162	16.6051	18.1471	20.023	22.4015	25.2916	27.1494	21.5759	18.359	16.2238	17.3567	21.0177
3	3	0	0	2002-05-13	0.0304162	16.1164	17.5498	19.3004	21.5446	24.2948	26.7363	21.655	18.4824	16.2484	17.2999	20.8315
3	3	0	0	2002-05-14	0.0304162	15.6181	16.9823	18.6234	20.737	23.3552	26.1716	21.7299	18.5998	16.2761	17.1147	20.65
3	3	0	0	2002-05-15	0.0304162	15.1273	16.4396	17.9842	19.9737	22.4671	25.3267	21.8004	18.6935	16.3062	16.9535	20.4816
3	3	0	0	2002-05-16	0.0304162	14.6576	15.9079	17.4042	19.2492	21.5897	24.3818	21.8713	18.7744	16.3386	16.8021	20.3207
3	3	0	0	2002-05-17	0.0304162	14.2287	15.4173	16.8411	18.574	20.7675	23.4472	21.9419	18.8524	16.3733	16.6668	20.1803
3	3	0	0	2002-05-18	0.0304162	13.8083	14.9627	16.3028	17.9278	19.9972	22.5467	22.0096	18.927	16.3261	16.5489	20.0536
3	3	0	0	2002-05-19	0.0304162	13.4111	14.5147	15.7916	17.3201	19.2716	21.6974	22.0757	18.9987	16.2598	16.4472	19.9398
3	3	0	0	2002-05-20	0.0304162	13.0395	14.083	15.3064	16.7482	18.5869	20.8959	22.1396	19.0698	16.1983	16.3578	19.796
3	3	0	0	2002-05-21	0.0304162	12.6818	13.6692	14.8325	16.2238	17.9356	20.1052	22.203	19.1386	16.1453	16.2787	19.6599
3	3	0	0	2002-05-22	0.0304162	12.3378	13.283	14.3909	15.7152	17.3271	19.3625	22.2652	19.2053	16.0996	16.2097	19.5343
3	3	0	0	2002-05-23	0.0304162	12.0345	12.9215	13.9862	15.2353	16.7489	18.6699	22.3268	19.271	16.0609	16.1504	19.4234
3	3	0	0	2002-05-24	0.0304162	11.741	12.5757	13.59	14.7787	16.2046	18.0166	22.3857	19.2293	16.0283	16.1007	19.2672
3	3	0	0	2002-05-25	0.0304162	11.4583	12.2488	13.2079	14.3441	15.6898	17.3985	22.4435	19.194	16.0008	16.0595	19.1265
3	3	0	0	2002-05-26	0.0304162	11.1858	11.9337	12.8415	13.921	15.2162	16.811	22.4946	19.1624	15.9778	16.0243	18.9416
3	3	0	0	2002-05-27	0.0304162	10.9201	11.6289	12.4959	13.5232	14.7565	16.259	22.2647	19.1344	15.9581	15.9089	18.7347
3	3	0	0	2002-05-28	0.0304162	14.7588	13.3966	13.5339	14.1795	15.1403	16.4174	22.3355	19.4533	16.171	15.9584	18.6417
3	3	0	0	2002-05-29	0.0304162	18.4711	15.1061	14.541	14.8102	15.5174	16.5823	22.2947	19.7613	16.3784	16.0147	18.534
3	3	0	0	2002-05-30	0.0304162	22.0219	16.7401	15.5065	15.4117	15.8798	16.7453	22.0536	20.0556	16.579	16.0771	18.416
3	3	0	0	2002-05-31	0.0304162	25.416	18.301	16.4278	15.9852	16.2198	16.9159	21.7302	20.339	16.7744	16.1432	18.2985
3	3	0	0	2002-06-01	0.0304162	28.568	19.7442	17.2753	16.5137	16.532	17.0583	21.3902	20.6037	16.9586	16.209	18.1903
3	3	0	0	2002-06-02	0.0304162	27.8737	21.3162	18.2223	17.1188	16.9183	17.2625	21.1053	20.8913	17.1588	16.285	18.1123
3	3	0	0	2002-06-03	0.0304162	27.4314	22.9514	19.2146	17.7636	17.3345	17.5031	20.87	21.1891	17.3653	16.3652	18.182
3	3	0	0	2002-06-04	0.0304162	27.1175	24.5697	20.1991	18.4093	17.7529	17.7527	20.6635	21.4831	17.5688	16.4488	18.1219
3	3	0	0	2002-06-05	0.0304162	26.8558	26.1358	21.1526	19.0348	18.1593	17.9925	20.4541	21.769	17.7664	16.5349	18.1975
3	3	0	0	2002-06-06	0.0304162	26.7305	27.6493	22.073	19.6391	18.5571	18.2317	20.266	22.0458	17.9578	16.623	18.1595
3	3	0	0	2002-06-07	0.0304162	26.295	27.0844	22.9759	20.2405	18.9541	18.4812	20.1054	22.3177	18.1461	16.7138	18.1048
3	3	0	0	2002-06-08	0.0304162	25.7193	26.5754	23.874	20.8407	19.3547	18.7319	19.9692	22.5864	18.327	16.804	18.0714
3	3	0	0	2002-06-09	0.0304162	25.1415	26.1295	24.7603	21.4348	19.7558	18.9843	19.8527	22.8512	18.5053	16.8825	18.0487
3	3	0	0	2002-06-10	0.0304162	24.5856	25.7207	25.6191	22.0108	20.1449	19.2303	19.747	23.1044	18.6776	16.9592	18.0353
3	3	0	0	2002-06-11	0.0304162	24.0823	25.4065	26.4603	22.5753	20.5278	19.478	19.6596	23.1423	18.8462	17.0373	18.0305
3	3	0	0	2002-06-12	0.0304162	23.5835	24.9393	25.9174	23.1278	20.9091	19.7257	19.5841	23.0595	19.0111	17.1177	18.0346
3	3	0	0	2002-06-13	0.0304162	23.0331	24.3762	25.3946	23.6638	21.2792	19.9678	19.5197	22.8982	19.1701	17.1991	17.9348
3	3	0	0	2002-06-14	0.0304162	22.4369	23.7893	24.8987	24.1795	21.6352	20.2026	19.4631	22.5935	19.3108	17.2803	17.8528
3	3	0	0	2002-06-15	0.0304162	21.8487	23.2171	24.43	24.6765	21.9784	20.4289	19.4207	22.2338	19.4401	17.3611	17.7769
3	3	0	0	2002-06-16	0.0304162	21.2308	22.6565	24.0145	25.1529	22.3064	20.645	19.377	21.8748	19.5641	17.4412	17.7119
3	3	0	0	2002-06-17	0.0304162	20.5899	22.0867	23.4895	24.5855	22.6202	20.8559	19.3382	21.5299	19.6842	17.4585	17.6598
3	3	0	0	2002-06-18	0.0304162	19.9566	21.4949	22.903	24.0351	22.9223	21.0588	19.3031	21.2069	19.7997	17.4595	17.619
3	3	0	0	2002-06-19	0.0304162	19.3666	20.9018	22.3151	23.5157	23.2169	21.2572	19.2735	20.905	19.9131	17.463	17.5871
3	3	0	0	2002-06-20	0.0304162	18.7931	20.3209	21.7425	23.0208	23.4998	21.4475	19.2425	20.6048	20.0225	17.4708	17.562
3	3	0	0	2002-06-21	0.0304162	19.1063	20.1685	21.4732	22.7875	23.9436	21.7731	19.3122	20.3964	20.1755	17.518	17.5719
3	3	0	0	2002-06-22	0.0304162	19.4452	20.0176	21.2062	22.4784	23.5575	22.091	19.3895	20.2092	20.3253	17.5684	17.5881
3	3	0	0	2002-06-23	0.0304162	19.8154	19.8859	20.935	22.1311	23.1911	22.4045	19.4663	20.0393	20.4019	17.6224	17.611
3	3	0	0	2002-06-24	0.0304162	20.1687	19.7677	20.6574	21.7785	22.8463	22.7088	19.542	19.8825	20.4798	17.6778	17.6389
3	3	0	0	2002-06-25	0.0304162	20.5125	19.6528	20.3848	21.435	22.5192	23.002	19.6151	19.735	20.5566	17.7339	17.6694
3	3	0	0	2002-06-26	0.0253685	20.0539	19.5801	20.1304	21.1184	22.2408	23.2954	19.6954	19.6059	20.6357	17.7924	17.6357
3	3	0	0	2002-06-27	0.0253685	19.6247	19.535	19.8866	20.8109	21.9077	22.902	19.7793	19.4883	20.7171	17.8537	17.5967
3	3	0	0	2002-06-28	0.0253685	19.2144	19.5149	19.6621	20.5048	21.5477	22.5283	19.8659	19.384	20.7979	17.9159	17.567
3	3	0	0	2002-06-29	0.0246435	18.8299	19.4993	19.4551	20.2006	21.1888	22.1769	19.9534	19.2897	20.8769	17.9784	17.5466
3	3	0	0	2002-06-30	0.0246435	18.4779	19.4951	19.2611	19.908	20.8436	21.8456	20.0396	19.2094	20.9554	18.0422	17.5332
3	3	0	0	2002-07-01	0.0246435	18.0874	19.0706	19.0825	19.6196	20.5121	21.5485	20.1241	19.1319	21.033	18.1061	17.5264
3	3	0	0	2002-07-02	0.0246435	17.6789	18.6518	18.9163	19.3347	20.1844	21.2029	20.2094	19.0613	21.1095	18.1698	17.5181
3	3	0	0	2002-07-03	0.0246435	17.2739	18.2442	18.7679	19.0651	19.8587	20.8354	20.2951	18.9979	21.1854	18.2329	17.5088
3	3	0	0	2002-07-04	0.0246435	16.8797	17.8548	18.6261	18.8112	19.5364	20.4706	20.3801	18.9402	21.2599	18.2942	17.5027
3	3	0	0	2002-07-05	0.0246435	16.5232	17.5005	18.5045	18.5766	19.2311	20.1235	20.4665	18.8866	21.3348	18.3556	17.5021
3	3	0	0	2002-07-06	0.0246435	16.1773	17.1323	18.1062	18.3563	18.9312	19.7897	20.5508	18.8393	21.408	18.4157	17.5059
3	3	0	0	2002-07-07	0.0246435	15.8369	16.7579	17.7135	18.1464	18.6351	19.4599	20.6318	18.7991	21.4793	18.4745	17.5126
3	3	0	0	2002-07-08	0.0246435	15.5104	16.3921	17.3329	17.9535	18.3541	19.134	20.714	18.7615	21.5498	18.5288	17.5195
3	3	0	0	2002-07-09	0.0246435	15.1823	16.031	16.9639	17.7651	18.0854	18.8106	20.7939	18.7261	21.6187	18.5816	17.5176
3	3	0	0	2002-07-10	0.0246435	14.809	15.6661	16.6033	17.5806	17.8231	18.4941	20.8691	18.6908	21.6818	18.6317	17.5156
3	3	0	0	2002-07-11	0.0246435	14.4022	15.2897	16.2223	17.1802	17.5654	18.1763	20.9376	18.6558	21.6012	18.6787	17.5147
3	3	0	0	2002-07-12	0.0246435	14.0102	14.9235	15.8421	16.7877	17.3192	17.8643	20.5487	18.6236	21.4421	18.7244	17.5166
3	3	0	0	2002-07-13	0.0246435	13.6246	14.5675	15.4696	16.4058	17.0877	17.5659	20.1755	18.5955	21.235	18.769	17.5219
3	3	0	0	2002-07-14	0.0242935	13.2614	14.2219	15.1078	16.0383	16.8644	17.2814	19.8206	18.5706	20.9371	18.8035	17.53
3	3	0	0	2002-07-15	0.0242935	12.9467	13.8778	14.7596	15.6891	16.6539	17.0104	19.4836	18.5483	20.6069	18.8327	17.5405
3	3	0	0	2002-07-16	0.0242935	12.7065	13.5543	14.4287	15.3433	16.2855	16.7556	19.1753	18.5289	20.2827	18.862	17.5536
3	3	0	0	2002-07-17	0.0242935	12.4714	13.2408	14.1062	14.9994	15.9244	16.5112	18.8373	18.5121	19.9712	18.8909	17.5186
3	3	0	0	2002-07-18	0.0242935	12.2773	12.9509	13.8041	14.6715	15.5801	16.286	18.4917	18.501	19.6809	18.9213	17.4743
3	3	0	0	2002-07-19	0.0242935	12.3997	12.8306	13.6144	14.4308	15.3106	16.1203	18.1852	18.5173	19.4243	18.9649	17.5061
3	3	0	0	2002-07-20	0.0242935	12.5848	12.7657	13.4468	14.2159	15.0683	15.9757	17.8979	18.5402	19.176	19.0108	17.4835
3	3	0	0	2002-07-21	0.0242935	12.9056	12.806	13.3381	14.0479	14.8558	15.7222	17.6391	18.5762	18.9526	19.0622	17.4706
3	3	0	0	2002-07-22	0.0242935	15.1992	13.8353	13.8936	13.8609	15.0393	15.8035	17.6045	18.7758	18.8549	19.1948	17.5272
3	3	0	0	2002-07-23	0.0242935	17.426	14.8516	14.4426	13.6399	15.2224	15.8877	17.5701	18.9747	18.7697	19.2734	17.5872
3	3	0	0	2002-07-24	0.0242935	19.2725	15.8361	14.9779	13.412	15.3991	15.9709	17.5331	19.1685	18.6929	19.3526	17.6481
3	3	0	0	2002-07-25	0.0242935	20.9787	16.7817	15.5034	13.1922	15.5684	16.0534	17.4972	19.3562	18.6221	19.4307	17.7095
3	3	0	0	2002-07-26	0.0202042	22.4396	17.6725	16.0172	12.9752	15.7262	16.1198	17.4566	19.5362	18.5581	19.5067	17.7695
3	3	0	0	2002-07-27	0.0202042	21.9148	18.557	16.5284	13.2605	15.8865	16.1853	17.419	19.3722	18.5015	19.5841	17.8317
3	3	0	0	2002-07-28	0.0202042	21.3847	19.4054	17.0293	13.5399	16.0446	16.2495	17.387	19.2175	18.4534	19.6608	17.8943
3	3	0	0	2002-07-29	0.0202042	20.8415	20.057	17.5045	13.8055	16.1915	16.3062	17.3558	19.0701	18.4095	19.7342	17.9557
3	3	0	0	2002-07-30	0.0202042	20.3421	20.6604	17.9685	14.0748	16.3323	16.3641	17.3298	18.9334	18.3752	19.8076	18.0183
3	3	0	0	2002-07-31	0.0202042	19.8215	21.1305	18.3889	14.33	16.455	16.4088	17.3	18.8072	18.3385	19.877	18.0783
3	3	0	0	2002-08-01	0.0198792	19.3229	20.6189	18.8123	14.5888	16.5837	16.4592	17.2782	18.6596	18.3082	19.9469	18.1394
3	3	0	0	2002-08-02	0.0198792	18.8644	20.1246	19.225	14.8498	16.7154	16.5146	17.2656	18.5036	18.2843	20.0178	18.2009
3	3	0	0	2002-08-03	0.0198792	18.4727	19.6571	19.5289	15.1083	16.8495	16.5717	17.2564	18.3497	18.265	20.0878	18.2615
3	3	0	0	2002-08-04	0.0192626	18.0211	19.1816	19.7807	15.3434	16.9747	16.6137	17.244	18.1972	18.2432	20.1545	18.3189
3	3	0	0	2002-08-05	0.0192626	17.67	18.7457	19.977	15.5709	17.1086	16.6575	17.1404	18.0522	18.2264	20.2203	18.3757
3	3	0	0	2002-08-06	0.0192626	17.8429	18.5829	19.6936	15.9317	17.3502	16.7935	17.1002	17.9553	18.2448	20.3079	18.45
3	3	0	0	2002-08-07	0.0192626	17.9513	18.4078	19.4001	16.2683	17.5807	16.9215	17.0585	17.8563	18.2625	20.3927	18.5191
3	3	0	0	2002-08-08	0.0192626	18.0007	18.2366	19.105	16.5086	17.7974	17.0414	17.0156	17.7546	18.2788	20.4743	18.5853
3	3	0	0	2002-08-09	0.0192626	18.0942	18.0578	18.8191	16.7208	18.0042	17.1612	16.9753	17.6562	18.2952	20.5517	18.6494
3	3	0	0	2002-08-10	0.0186454	18.1462	17.9081	18.5458	16.881	18.1966	17.2815	16.9284	17.5576	18.312	20.5213	18.711
3	3	0	0	2002-08-11	0.0186454	17.6038	17.7233	18.2566	16.5328	18.3767	17.3925	16.8757	17.457	18.3275	20.4297	18.7697
3	3	0	0	2002-08-12	0.0186454	17.0825	17.5168	17.966	16.1824	18.5418	17.4977	16.8216	17.3603	18.3438	20.3007	18.8265
3	3	0	0	2002-08-13	0.0184454	16.5621	17.2814	17.6785	15.8309	18.63	17.5916	16.7636	17.265	18.3585	20.1007	18.6487
3	3	0	0	2002-08-14	0.0184454	16.0404	17.0673	17.3852	15.4862	18.6953	17.6768	16.7045	17.1722	18.372	19.8744	18.6892
3	3	0	0	2002-08-15	0.0136359	15.531	16.8386	17.1157	15.1539	18.7216	17.7523	16.6444	17.0826	18.3843	19.6501	18.7277
3	3	0	0	2002-08-16	0.0136359	15.053	16.3284	16.8333	14.8174	18.3475	17.8228	16.5838	16.9956	18.3966	19.4341	18.765
3	3	0	0	2002-08-17	0.00770258	14.5154	15.7989	16.5163	14.4651	17.9596	17.8708	16.5151	16.9069	18.4052	19.2283	18.7988
3	3	0	0	2002-08-18	0.00770258	13.9678	15.2649	16.1768	14.1125	17.569	17.8529	16.4401	16.8152	18.4101	19.0314	18.8302
3	3	0	0	2002-08-19	0.00770258	13.4269	14.7337	15.8538	13.7574	17.1849	17.8173	16.3604	16.7251	18.4135	18.8363	18.8598
3	3	0	0	2002-08-20	0.00770258	12.9307	14.2308	15.5359	13.4311	16.8198	17.7564	16.2836	16.5679	18.4172	18.6535	18.8887
3	3	0	0	2002-08-21	0.00770258	12.4292	13.7411	15.0287	13.0939	16.4504	17.361	16.2053	16.4109	18.4186	18.4815	18.9158
3	3	0	0	2002-08-22	0.00770258	11.993	13.2542	14.5303	12.7472	16.0813	16.9652	16.1244	16.2551	18.4192	18.3186	18.8994
3	3	0	0	2002-08-23	0.00770258	11.6163	12.7921	14.0487	12.3984	15.7239	16.5769	16.0438	16.1025	18.4189	18.1639	18.8851
3	3	0	0	2002-08-24	0.00747758	11.2605	12.3437	13.5759	12.0672	15.3686	16.1975	15.9661	15.9541	18.4176	18.016	18.8717
3	3	0	0	2002-08-25	0.00698472	10.8938	11.9122	13.1184	11.7371	15.0343	15.8322	15.8938	15.8046	18.4158	17.8767	18.8594
3	3	0	0	2002-08-26	0.00613651	10.5582	11.4937	12.6801	11.2727	14.6974	15.4684	15.8217	15.6554	18.1852	17.7432	18.8487
3	3	0	0	2002-08-27	0.00613651	10.2459	11.1194	12.2514	10.8209	14.3576	15.1087	15.749	15.5077	17.9622	17.6172	18.838
3	3	0	0	2002-08-28	0.00613651	9.93827	10.7773	11.8408	10.3828	14.017	14.7597	15.6746	15.3615	17.7476	17.497	18.827
3	3	0	0	2002-08-29	0.00300317	9.65036	10.4554	11.4459	9.95623	13.6944	14.4156	15.5999	15.2184	17.5418	17.3853	18.8169
3	3	0	0	2002-08-30	0.00300317	9.37567	10.1347	11.0667	9.54446	13.3754	14.0912	15.5238	15.0786	17.3495	17.2767	18.8074
3	3	0	0	2002-08-31	0.00300317	9.12632	9.84228	10.7045	9.15339	12.9541	13.7689	15.45	14.9427	17.1437	17.1734	18.799
3	3	0	0	2002-09-01	0.00300317	8.89616	9.57102	10.3784	8.77431	12.5466	13.4474	15.3733	14.8095	16.9325	17.0751	18.7913
3	3	0	0	2002-09-02	0.00300317	8.7078	9.32305	10.0875	8.41915	12.1585	13.1322	15.2646	14.6805	16.7248	16.9818	18.7843
3	3	0	0	2002-09-03	0.00300317	8.54758	9.09896	9.81947	8.08304	11.7851	12.8366	15.1513	14.5539	16.5246	16.8916	18.7786
3	3	0	0	2002-09-04	0.00300317	8.40202	8.88885	9.55715	7.76221	11.4266	12.5465	15.0234	14.4306	16.3313	16.8064	18.7733
3	3	0	0	2002-09-05	0.00284127	8.25754	8.69194	9.31403	7.45451	11.0849	12.1714	14.6787	14.3111	16.1416	16.7265	18.7682
3	3	0	0	2002-09-06	0.00284127	8.11619	8.50618	9.08607	7.17451	10.7533	11.8082	14.3388	14.1933	15.9545	16.6489	18.7634
3	3	0	0	2002-09-07	0.00284127	8.13753	8.42266	8.92786	6.96169	10.4736	11.4883	14.0272	14.0934	15.7801	16.5812	18.7648
3	3	0	0	2002-09-08	0.00284127	8.71153	8.62955	8.96981	6.90419	10.3194	11.2729	13.7883	14.0456	15.6427	16.5396	18.7836
3	3	0	0	2002-09-09	0.00284127	15.5032	11.9526	11.0937	8.40538	11.4212	12.1061	14.2526	14.5224	15.8546	16.7604	18.926
3	3	0	0	2002-09-10	0.00284127	21.8431	15.0503	13.0757	9.808	12.4429	12.8779	14.6708	14.9638	16.0449	16.9651	19.007
3	3	0	0	2002-09-11	0.00284127	27.6507	17.8835	14.8877	11.0889	13.3804	13.5696	15.035	15.3622	16.211	17.1502	19.0422
3	3	0	0	2002-09-12	0.00284127	32.9338	20.5357	16.5931	12.2911	14.2668	14.2169	15.3707	15.7328	16.3633	17.3231	19.0116
3	3	0	0	2002-09-13	0.00284127	37.2216	22.9667	18.1604	13.3946	15.0784	14.8031	15.6638	16.0686	16.4968	17.4799	18.9478
3	3	0	0	2002-09-14	0	34.867	25.1858	19.5913	14.399	15.8086	15.329	15.9245	16.3692	16.6123	17.6204	18.8735
3	3	0	0	2002-09-15	0	32.5799	27.2118	20.8937	15.3136	16.4732	15.7992	16.1438	16.6395	16.7111	17.7472	18.7948
3	3	0	0	2002-09-16	0	30.7455	29.1988	22.1712	16.2142	17.1311	16.2749	16.3554	16.9014	16.8105	17.8726	18.7253
3	3	0	0	2002-09-17	0	28.9568	30.9457	23.3429	17.0459	17.735	16.7153	16.5358	17.1126	16.8961	17.9864	18.6559
3	3	0	0	2002-09-18	0	27.3368	32.2789	24.4237	17.8164	18.2938	17.1216	16.699	17.298	16.9715	18.0904	18.581
3	3	0	0	2002-09-19	0	25.8914	30.3789	25.4207	18.5277	18.8079	17.4889	16.8379	17.4513	16.9892	18.1852	18.5083
3	3	0	0	2002-09-20	0	24.6544	28.6171	26.3591	19.1954	19.2922	17.8366	16.9006	17.4274	17.0004	18.273	18.4401
3	3	0	0	2002-09-21	0	23.2544	26.9996	27.2171	19.8036	19.7327	18.1515	16.9444	17.387	17.0015	18.3523	18.3728
3	3	0	0	2002-09-22	0.000617143	21.9835	25.4698	27.9585	20.3648	20.1441	18.443	16.9783	17.3386	16.9969	18.425	18.3074
3	3	0	0	2002-09-23	0.000617143	20.7477	24.0433	28.4351	20.8665	20.5134	18.7029	16.9939	17.2788	16.9846	18.4889	18.241
3	3	0	0	2002-09-24	0.000617143	19.6043	22.7474	26.7871	21.3283	20.8537	18.9407	16.9999	17.215	16.9642	18.547	18.1771
3	3	0	0	2002-09-25	0.000617143	18.4359	21.5444	25.2226	21.74	21.1542	19.1495	16.9931	17.1375	16.9343	18.4263	18.1122
3	3	0	0	2002-09-26	0.000617143	17.3691	20.3125	23.79	22.1169	21.4275	19.3389	16.9764	17.0524	16.8991	18.3064	18.0493
3	3	0	0	2002-09-27	0.000617143	16.3764	19.1799	22.4385	22.4247	21.6779	19.5162	16.9578	16.9666	16.8607	18.1897	17.9885
3	3	0	0	2002-09-28	0.000950476	16.9718	18.8599	21.686	22.9316	22.1982	19.9231	17.0974	16.998	16.9009	18.1371	17.9805
3	3	0	0	2002-09-29	0.000950476	17.6092	18.6069	21.0346	21.8548	22.6952	20.313	17.2309	17.0307	16.9376	18.0903	17.9716
3	3	0	0	2002-09-30	0.00179869	18.2386	18.3373	20.4427	20.8389	23.1503	20.6683	17.347	17.0471	16.9655	18.0248	17.96
3	3	0	0	2002-10-01	0.00179869	19.0045	18.1872	19.876	19.9554	23.6051	21.0236	17.4752	17.0641	16.9952	17.9553	17.9525
3	3	0	0	2002-10-02	0.00588798	19.7446	18.0607	19.3684	19.1273	23.9992	21.3556	17.5996	17.0725	17.0198	17.8825	17.9442
3	3	0	0	2002-10-03	0.00682964	19.1248	18.0484	18.9481	18.4073	24.2808	21.686	17.7305	17.0899	17.0454	17.815	17.9381
3	3	0	0	2002-10-04	0.00682964	18.5054	18.0574	18.573	17.7641	23.2956	21.9969	17.8503	17.1003	17.067	17.7477	17.9321
3	3	0	0	2002-10-05	0.00682964	18.0767	18.1576	18.2504	17.2129	22.397	22.3047	17.9745	17.0666	17.0899	17.6824	17.9298
3	3	0	0	2002-10-06	0.0116392	17.5897	18.2971	17.988	16.6662	21.5929	22.6025	18.0972	17.034	17.1107	17.6165	17.88
3	3	0	0	2002-10-07	0.0116392	17.0812	18.4129	17.7342	16.1583	20.8287	22.8463	18.2068	16.9959	17.1253	17.5466	17.8747
3	3	0	0	2002-10-08	0.0116392	17.5791	18.352	17.8919	15.9677	20.3523	23.1639	18.4325	17.047	17.1994	17.523	17.9049
3	3	0	0	2002-10-09	0.0116392	18.093	18.2992	18.0692	15.8147	19.9405	22.4285	18.6502	17.0959	17.2721	17.4981	17.9346
3	3	0	0	2002-10-10	0.0118642	18.5908	18.3337	18.3021	15.6973	19.5991	21.7627	18.867	17.1489	17.3444	17.4743	17.9651
3	3	0	0	2002-10-11	0.0118642	18.9789	18.2844	18.5244	15.5975	19.2393	21.1572	19.0674	17.192	17.4082	17.4476	17.9921
3	3	0	0	2002-10-12	0.0118642	19.3038	18.1924	18.7099	15.4883	18.8981	20.5747	19.2474	17.2244	17.4611	17.4161	18.0139
3	3	0	0	2002-10-13	0.0118642	18.4413	18.0102	18.3818	15.391	18.5731	20.0338	19.4093	17.2471	17.5046	17.381	18.0312
3	3	0	0	2002-10-14	0.0120642	17.5364	17.8147	18.0449	15.2978	18.2697	19.5398	19.557	17.263	17.5404	17.3442	18.0448
3	3	0	0	2002-10-15	0.0120642	16.5358	17.5634	17.7345	15.2222	17.9756	19.0885	19.6903	17.2725	17.5702	17.3054	18.056
3	3	0	0	2002-10-16	0.0120642	15.5937	17.2863	17.3875	15.1534	17.7074	18.6317	19.8116	17.2819	17.5924	17.2658	18.0648
3	3	0	0	2002-10-17	0.0120642	14.7481	17.0259	17.0443	15.0811	17.4509	18.2064	19.9186	17.2894	17.5915	17.2237	18.0708
3	3	0	0	2002-10-18	0.012557	13.978	16.2097	16.6662	14.6425	17.2191	17.8072	20.0127	17.293	17.582	17.1804	18.0743
3	3	0	0	2002-10-19	0.012557	13.2592	15.3978	16.2962	14.2102	17.0006	17.4346	20.0966	17.2903	17.56	17.1005	18.0756
3	3	0	0	2002-10-20	0.012557	12.5763	14.556	15.901	13.8066	16.8037	17.0757	20.1702	17.2847	17.4245	17.0192	18.074
3	3	0	0	2002-10-21	0.012557	12.9253	14.2595	15.8327	13.6337	16.8185	16.9104	20.346	17.3596	17.3424	16.9787	18.1043
3	3	0	0	2002-10-22	0.012557	13.3147	14.0314	15.7888	13.4736	16.8385	16.7615	20.4938	17.4309	17.2605	16.9382	18.1327
3	3	0	0	2002-10-23	0.012557	13.6765	13.8272	15.3653	13.2804	16.5599	16.6286	20.5643	17.4943	17.1764	16.8955	18.1573
3	3	0	0	2002-10-24	0.012557	14.0207	13.64	14.9388	13.0891	16.283	16.504	19.9319	17.5509	17.0923	16.8492	18.1789
3	3	0	0	2002-10-25	0.012557	14.2894	13.4328	14.4671	12.8598	16.0138	16.3846	19.3308	17.5957	17.0008	16.7969	18.0584
3	3	0	0	2002-10-26	0.012557	13.5584	13.2419	14.0258	12.6258	15.7292	16.2751	18.7801	17.6356	16.9076	16.7431	17.9406
3	3	0	0	2002-10-27	0.012557	12.8281	13.0714	13.6303	12.4103	15.4552	16.1701	18.2598	17.6717	16.8153	16.688	17.8263
3	3	0	0	2002-10-28	0.013557	12.1456	12.9111	13.2667	11.9221	15.1641	15.8242	17.7781	17.7023	16.721	16.6318	17.715
3	3	0	0	2002-10-29	0.013557	11.4971	12.7589	12.9257	11.4401	14.8813	15.4853	17.3351	17.7277	16.6298	16.5745	17.6098
3	3	0	0	2002-10-30	0.0163983	11.0193	12.6543	12.6283	10.9669	14.6023	15.1814	16.9352	17.7534	16.5395	16.5194	17.4966
3	3	0	0	2002-10-31	0.0163983	10.8506	12.2046	12.4448	10.5937	14.3814	14.9162	16.5694	17.7985	16.4624	16.4755	17.3879
3	3	0	0	2002-11-01	0.0214459	13.323	13.0756	13.1553	10.9152	14.7035	15.0998	16.5227	18.0563	16.5292	16.5399	17.3665
3	3	0	0	2002-11-02	0.0214459	16.3902	14.2679	14.0708	11.4093	14.9263	15.3685	16.5617	18.3558	16.6304	16.6262	17.3661
3	3	0	0	2002-11-03	0.0214459	20.003	15.7502	15.1737	12.0568	15.2633	15.7349	16.681	18.6945	16.7594	16.734	17.3856
3	3	0	0	2002-11-04	0.0214459	23.3403	17.1798	16.2163	12.668	15.5522	16.0587	16.7892	19.0103	16.8449	16.8321	17.3981
3	3	0	0	2002-11-05	0.0214459	25.9502	18.4004	16.7864	13.1829	15.7757	16.3095	16.8691	19.2847	16.9068	16.9104	17.3956
3	3	0	0	2002-11-06	0.0226173	29.3796	21.3513	18.5103	14.573	16.7187	17.1496	17.3444	19.8265	17.1614	17.1314	17.5077
3	3	0	0	2002-11-07	0.0285673	33.7275	25.0588	20.7544	16.3467	17.9836	18.0599	18.0039	20.4405	17.4989	17.4145	17.6709
3	3	0	0	2002-11-08	0.0285673	37.5756	28.7894	23.0252	18.1358	19.2712	18.9821	18.6778	20.5339	17.8389	17.6995	17.8354
3	3	0	0	2002-11-09	0.0285673	41.2389	32.2896	25.1995	19.8337	20.4928	19.8333	19.3229	20.6266	18.158	17.9666	17.9866
3	3	0	0	2002-11-10	0.0285673	44.7701	35.3599	27.1903	21.144	21.611	20.608	19.9135	20.7113	18.445	18.2081	18.1201
3	3	0	0	2002-11-11	0.0285673	44.6107	36.9918	29.1021	22.3954	22.6898	21.3662	20.4807	20.799	18.7192	18.4374	18.2466
3	3	0	0	2002-11-12	0.0285673	42.5977	38.1627	30.9055	23.5772	23.7076	22.086	20.8513	20.8885	18.9743	18.65	18.3625
3	3	0	0	2002-11-13	0.0292923	40.4083	38.9911	32.6616	24.7323	24.7006	22.7937	21.2108	20.9954	19.2208	18.8537	18.4746
3	3	0	0	2002-11-14	0.0292923	38.2162	39.7276	34.2652	25.8154	25.6208	23.4468	21.5426	21.0962	19.4448	19.0393	18.5742
3	3	0	0	2002-11-15	0.0292923	36.2598	40.5132	35.6588	26.8184	26.277	24.0518	21.8303	21.1704	19.6528	19.2072	18.6634
3	3	0	0	2002-11-16	0.0314257	34.032	39.3213	36.006	27.697	26.8339	24.5806	22.0685	21.2221	19.834	19.3387	18.7355
3	3	0	0	2002-11-17	0.0314257	31.9772	37.2913	36.1008	28.5348	27.3676	25.0858	22.2792	21.2751	20.0049	19.4579	18.802
3	3	0	0	2002-11-18	0.0314257	29.6279	35.0195	35.8704	29.2654	27.8224	25.5221	22.4468	21.307	20.1485	19.5505	18.8253
3	3	0	0	2002-11-19	0.0315876	27.5887	32.9064	35.6816	29.958	28.2811	25.949	22.5997	21.341	20.2871	19.5556	18.8456
3	3	0	0	2002-11-20	0.0315876	25.661	30.9567	35.5616	30.5207	28.6973	26.1741	22.727	21.3709	20.4121	19.5503	18.8583
3	3	0	0	2002-11-21	0.0315876	24.0517	29.0449	34.2265	30.3791	29.0784	26.37	22.843	21.3944	20.5249	19.5379	18.865
3	3	0	0	2002-11-22	0.0315876	22.3927	27.1819	32.3222	30.0357	29.4175	26.5386	22.8142	21.4122	20.6234	19.5169	18.8647
3	3	0	0	2002-11-23	0.0315876	21.0545	25.3406	30.3607	29.5285	29.7342	26.6946	22.776	21.4278	20.7131	19.4928	18.8587
3	3	0	0	2002-11-24	0.0315876	19.6569	23.6241	28.4866	29.037	30.0084	26.8433	22.718	21.4427	20.7925	19.4615	18.8467
3	3	0	0	2002-11-25	0.0315876	18.2933	21.9761	26.7333	28.6063	30.186	26.9633	22.6507	21.4477	20.8591	19.4215	18.8276
3	3	0	0	2002-11-26	0.0315876	17.0373	20.5466	25.0416	27.2931	29.8211	27.0714	22.591	21.4493	20.9193	19.3794	18.8052
3	3	0	0	2002-11-27	0.0315876	15.9453	19.1709	23.4397	25.5902	29.3284	27.1718	22.5369	21.3267	20.9732	19.3337	18.7803
3	3	0	0	2002-11-28	0.0315876	14.6608	17.858	21.8755	23.7999	28.6658	27.222	22.4565	21.1822	21.0224	19.2895	18.7539
3	3	0	0	2002-11-29	0.0315876	13.7795	16.7199	20.437	22.1726	28.0965	27.3037	22.412	21.0711	21.0668	19.2423	18.7262
3	3	0	0	2002-11-30	0.0315876	13.0242	15.6586	19.0881	20.6699	27.6002	27.3255	22.3652	20.9494	21.104	19.1899	18.6953
3	3	0	0	2002-12-01	0.0315876	12.5569	14.7964	17.9752	19.2815	26.4568	26.9437	22.3475	20.8504	21.1486	19.1446	18.6705
3	3	0	0	2002-12-02	0.0315876	12.1616	14.0538	16.9275	17.9811	25.016	26.4673	22.335	20.7465	21.1895	19.1765	18.6443
3	3	0	0	2002-12-03	0.0315876	11.7723	13.3575	16.0174	16.7118	23.5619	25.8971	22.3225	20.6446	21.2252	19.1308	18.6164
3	3	0	0	2002-12-04	0.0315876	11.3917	12.727	15.1305	15.5367	22.1831	25.3591	22.3115	20.5375	21.2565	19.1555	18.5874
3	3	0	0	2002-12-05	0.0315876	11.0638	12.1844	14.3143	14.442	20.9154	24.891	22.1897	20.429	21.2834	19.0849	18.5564
3	3	0	0	2002-12-06	0.0315876	10.5891	11.7137	13.5815	13.4904	19.7101	23.859	22.0759	20.3328	21.3005	19.0178	18.5267
3	3	0	0	2002-12-07	0.0315876	10.1679	11.3054	12.946	12.5993	18.5855	22.5873	21.9765	20.1523	21.2861	18.9531	18.4989
3	3	0	0	2002-12-08	0.0315876	9.85515	10.9543	12.3776	11.8385	17.5074	21.3238	21.891	19.9815	20.9271	18.8922	18.4742
3	3	0	0	2002-12-09	0.0315876	9.58716	10.6302	11.868	11.1064	16.5137	20.1308	21.8204	19.8107	20.5912	18.8332	18.4493
3	3	0	0	2002-12-10	0.0315876	9.71266	10.5289	11.5481	10.5256	15.663	19.0952	21.7936	19.6803	20.3025	18.7896	18.4354
3	3	0	0	2002-12-11	0.0315876	10.7831	10.8268	11.5911	10.2436	15.1159	18.2689	21.8801	19.6462	20.0855	18.7887	18.4535
3	3	0	0	2002-12-12	0.0315876	11.8443	11.1468	11.6727	10.0323	14.6153	17.5088	21.9743	19.626	19.8918	18.79	18.4716
3	3	0	0	2002-12-13	0.0315876	12.7657	11.4511	11.7458	9.83634	14.1909	16.7639	22.0632	19.6075	19.7148	18.7886	18.4856
3	3	0	0	2002-12-14	0.0315876	13.6136	11.7411	11.8122	9.66609	13.7748	16.0773	22.14	19.5906	19.5532	18.7849	18.4873
3	3	0	0	2002-12-15	0.0315876	14.0484	12.0212	11.8897	9.53489	13.3971	15.4409	22.1802	19.575	19.3904	18.7818	18.4945
3	3	0	0	2002-12-16	0.0315876	13.4643	12.2644	11.8936	9.42107	13.0546	14.8875	21.9269	19.5626	19.2405	18.7795	18.489
3	3	0	0	2002-12-17	0.0315876	12.7774	12.4515	11.8779	9.31054	12.7483	14.3558	21.6044	19.5494	19.0985	18.7747	18.478
3	3	0	0	2002-12-18	0.0315876	12.157	12.6021	11.874	9.21027	12.4674	13.8988	21.2228	19.539	18.9675	18.7682	18.4606
3	3	0	0	2002-12-19	0.0315876	16.9189	15.4069	13.6546	10.4505	13.2836	14.3457	21.4578	19.9759	19.1391	18.9837	18.5541
3	3	0	0	2002-12-20	0.0315876	23.7096	19.0197	16.1049	12.2063	14.5368	15.1628	21.9624	20.4969	19.4314	19.2818	18.7132
3	3	0	0	2002-12-21	0.0315876	30.2536	21.9996	18.4484	13.8453	15.7545	15.968	22.0553	20.9978	19.7155	19.5677	18.8644
3	3	0	0	2002-12-22	0.0315876	36.5663	24.8126	20.6774	15.4117	16.9286	16.7648	21.9509	21.4804	19.993	19.8408	19.0069
3	3	0	0	2002-12-23	0.0315876	42.1968	27.3168	22.654	16.816	17.9741	17.4689	21.7673	21.9101	20.2381	20.0841	19.1285
3	3	0	0	2002-12-24	0.0315876	42.0789	29.6385	24.4844	18.1219	18.9427	18.1293	21.5821	22.3151	20.4681	20.3088	19.2355
3	3	0	0	2002-12-25	0.0315876	39.9859	31.9883	26.1959	19.4369	19.9292	18.8251	21.4622	22.7223	20.7035	20.5326	19.3427
3	3	0	0	2002-12-26	0.0315876	37.9424	34.2388	27.5015	20.6836	20.8316	19.4994	21.3465	23.1145	20.9293	20.7463	19.4438
3	3	0	0	2002-12-27	0.0315876	35.7165	36.2821	28.6348	21.7989	21.6396	20.1069	21.2175	23.4679	21.05	20.9386	19.5288
3	3	0	0	2002-12-28	0.0315876	34.0518	38.2642	29.7494	22.8652	22.4301	20.7007	21.0925	23.8133	21.1672	21.124	19.6122
3	3	0	0	2002-12-29	0.0315876	32.3883	37.3733	30.7426	23.8221	23.142	21.2305	20.9657	24.1191	21.2698	21.2897	19.6804
3	3	0	0	2002-12-30	0.0315876	30.3863	35.3266	31.6419	24.6053	23.7936	21.7189	20.8412	24.3742	21.3514	21.4398	19.7361
3	3	0	0	2002-12-31	0.0315876	28.286	33.2548	32.442	25.0592	24.371	22.1209	20.739	24.3843	21.4194	21.5738	19.7803
3	3	0	0	2003-01-01	0.0315876	26.3968	31.1974	33.1746	25.437	24.8853	22.4794	20.6288	24.3254	21.4696	21.694	19.8174
3	3	0	0	2003-01-02	0.0315876	24.5555	29.4443	33.8821	25.8126	25.3702	22.8312	20.5599	24.2162	21.519	21.8088	19.8511
3	3	0	0	2003-01-03	0.0315876	23.0795	27.8746	32.7962	26.1886	25.8406	23.1785	20.4959	24.1209	21.5634	21.919	19.8643
3	3	0	0	2003-01-04	0.0315876	21.7395	26.2035	30.9852	26.5279	26.199	23.4981	20.4369	24.0468	21.5976	22.0191	19.8718
3	3	0	0	2003-01-05	0.0315876	20.958	24.7627	29.3436	26.9327	26.406	23.849	20.4265	23.706	21.6504	22.1197	19.8882
3	3	0	0	2003-01-06	0.0315876	20.1872	23.4327	27.7149	27.2895	26.5539	24.1492	20.4149	23.2205	21.6302	22.1839	19.8966
3	3	0	0	2003-01-07	0.0315876	19.3722	22.1045	26.2745	27.6164	26.6915	24.4174	20.4041	22.7227	21.6057	21.9817	19.9014
3	3	0	0	2003-01-08	0.0315876	18.4336	20.8972	24.9152	26.5672	26.8045	24.6529	20.3913	22.2438	21.5703	21.7887	19.9014
3	3	0	0	2003-01-09	0.0315876	17.5446	19.7827	23.5048	24.9867	26.8982	24.8035	20.385	21.8014	21.5335	21.6097	19.8966
3	3	0	0	2003-01-10	0.0315876	22.2613	21.7503	24.1164	24.9347	28.1653	25.7621	21.0384	21.8676	21.8304	21.6867	20.0876
3	3	0	0	2003-01-11	0.0315876	27.9997	24.2341	25.1426	25.1479	29.5985	26.8418	21.7854	22.0274	22.1768	21.8114	20.3046
3	3	0	0	2003-01-12	0.0315876	34.0338	26.8438	26.2685	25.576	31.067	27.9621	22.5566	22.215	22.5378	21.9587	20.5276
3	3	0	0	2003-01-13	0.0315876	39.9497	29.3321	27.4355	26.0353	31.4106	29.0421	23.2989	22.4117	22.8866	22.1074	20.7406
3	3	0	0	2003-01-14	0.0315876	45.4852	31.6525	28.5357	26.3601	31.252	30.0419	23.9913	22.5935	23.2094	22.2353	20.938
3	3	0	0	2003-01-15	0.0315876	44.6884	33.6155	29.5839	26.6211	31.0523	30.9661	24.6086	22.7788	23.5093	22.3539	21.121
3	3	0	0	2003-01-16	0.0315876	42.5821	35.4321	30.5378	26.8643	30.8017	31.8094	25.1656	22.9347	23.7815	22.4583	21.2858
3	3	0	0	2003-01-17	0.0315876	39.7989	37.0564	31.3497	27.0128	30.5873	32.5691	25.6707	23.0859	24.0278	22.5499	21.4325
3	3	0	0	2003-01-18	0.0315876	36.8611	38.5434	32.028	27.1525	30.3664	32.3651	26.1283	23.2074	24.2511	22.6276	21.5643
3	3	0	0	2003-01-19	0.0315876	34.0201	39.8952	32.6299	27.269	30.0593	31.7606	26.542	23.3137	24.3971	22.6957	21.6257
3	3	0	0	2003-01-20	0.0315876	31.3089	38.14	33.0352	27.3776	29.7262	31.1425	26.9111	23.4074	24.5248	22.7543	21.7309
3	3	0	0	2003-01-21	0.0315876	28.8514	35.8614	33.4259	27.4781	29.4287	30.5236	27.2416	23.4963	24.6403	22.8077	21.8256
3	3	0	0	2003-01-22	0.0315876	26.5303	33.303	33.7361	27.5068	29.0836	29.9584	27.5237	23.5658	24.7386	22.8502	21.9071
3	3	0	0	2003-01-23	0.0315876	24.502	30.8244	34.0514	27.5084	28.7895	29.4362	27.7857	23.6349	24.8343	22.8921	21.9825
3	3	0	0	2003-01-24	0.0315876	22.6809	28.4911	34.345	27.5047	28.5186	28.8768	27.9832	23.7031	24.9195	22.9288	22.0497
3	3	0	0	2003-01-25	0.0315876	21.0058	26.3032	32.6117	27.3896	28.2703	28.3196	28.047	23.7617	24.9948	22.9589	22.1092
3	3	0	0	2003-01-26	0.0315876	19.4924	24.3074	30.5857	27.3037	28.0473	27.8192	28.091	23.8149	25.0642	22.9243	22.1629
3	3	0	0	2003-01-27	0.0315876	20.7357	23.7743	29.3037	27.8477	28.3195	27.7391	28.4092	24.072	25.2675	22.9922	22.2952
3	3	0	0	2003-01-28	0.0315876	22.3973	23.5909	28.2005	28.4993	28.6531	27.771	28.7614	24.3529	25.482	23.0771	22.4342
3	3	0	0	2003-01-29	0.0315876	24.0912	23.5276	27.2133	29.1414	28.9887	27.8277	29.0988	24.6254	25.6709	23.1525	22.5655
3	3	0	0	2003-01-30	0.0315876	25.6907	23.4891	26.2842	28.2469	29.2169	27.8873	29.4057	24.856	25.6974	23.2184	22.6847
3	3	0	0	2003-01-31	0.0315876	27.1058	23.4385	25.4306	27.0804	29.4311	27.9373	29.6831	25.0603	25.6749	23.2686	22.791
3	3	0	0	2003-02-01	0.0315876	25.8288	23.423	24.6468	25.7964	29.6109	27.9512	29.9282	25.2433	25.6066	23.3091	22.8855
3	3	0	0	2003-02-02	0.0315876	24.105	23.3918	23.9498	24.5384	29.7874	27.9419	29.5599	25.4285	25.5508	23.3482	22.9783
3	3	0	0	2003-02-03	0.0315876	22.2987	23.3357	23.3056	23.3462	29.9397	27.9208	28.9424	25.5777	25.4945	23.3685	23.0542
3	3	0	0	2003-02-04	0.0315876	20.6253	23.2987	22.7221	22.2311	28.8895	27.8318	28.3357	25.7085	25.2375	23.3859	23.1168
3	3	0	0	2003-02-05	0.0315876	19.1286	23.2579	22.1894	21.2168	27.6569	27.7609	27.7456	25.8232	24.8903	23.353	23.154
3	3	0	0	2003-02-06	0.0315876	17.7792	21.9447	21.7292	20.2919	26.36	27.6857	27.2153	25.9199	24.5333	23.3159	22.9772
3	3	0	0	2003-02-07	0.0315876	19.7723	22.0793	22.3723	20.2672	25.752	28.165	27.0818	26.2772	24.3739	23.4091	22.9187
3	3	0	0	2003-02-08	0.0315876	21.836	22.2081	23.0234	20.3	25.2111	28.636	26.9256	26.5882	24.236	23.4992	22.8698
3	3	0	0	2003-02-09	0.0315876	23.8817	22.3942	23.6806	20.3737	24.7282	28.1018	26.7734	26.8002	24.1021	23.5883	22.8244
3	3	0	0	2003-02-10	0.0315876	29.3183	24.3641	25.4656	21.3334	25.0039	27.9807	27.0346	27.2796	24.1683	23.8179	22.8999
3	3	0	0	2003-02-11	0.0315876	34.8276	26.4441	26.4265	22.3655	25.3657	27.8181	27.3016	27.7584	24.2389	24.048	22.9852
3	3	0	0	2003-02-12	0.0315876	37.0775	28.5656	27.2662	23.4106	25.7961	27.6864	27.6028	28.2325	24.3263	24.2767	23.0779
3	3	0	0	2003-02-13	0.0315876	39.0524	30.5848	28.0103	24.3921	26.2173	27.5649	27.8885	28.6717	24.407	24.4885	23.1559
3	3	0	0	2003-02-14	0.0315876	40.8068	32.4854	28.7197	25.324	26.6275	27.455	28.1647	29.0789	24.4939	24.6858	23.2288
3	3	0	0	2003-02-15	0.0315876	38.9501	34.2754	29.414	26.1989	27.0238	27.3754	28.4296	29.4606	24.5712	24.8702	23.2964
3	3	0	0	2003-02-16	0.0315876	36.8298	35.9693	30.0935	26.3888	27.4253	27.3232	28.6654	29.8143	24.6547	25.0418	23.3592
3	3	0	0	2003-02-17	0.0315876	34.442	35.9011	30.7122	26.4219	27.7841	27.2841	28.8654	29.6929	24.7227	25.1996	23.4136
3	3	0	0	2003-02-18	0.0315876	32.1667	35.75	31.2995	26.4108	28.1139	27.2556	29.047	29.3764	24.784	25.3019	23.4624
3	3	0	0	2003-02-19	0.0315876	30.0455	35.5667	31.8596	26.4127	28.4353	27.2439	29.1744	29.0614	24.8425	25.3946	23.5069
3	3	0	0	2003-02-20	0.0315876	28.0649	33.6492	32.3926	26.4382	28.7388	27.2441	29.3047	28.7523	24.9018	25.4815	23.5497
3	3	0	0	2003-02-21	0.0315876	29.6314	33.371	34.0443	27.3396	29.2044	27.8398	29.8053	28.7674	25.1467	25.7041	23.7029
3	3	0	0	2003-02-22	0.0315876	32.2726	33.4977	34.8786	28.4638	29.759	28.5789	30.4031	28.8758	25.4393	25.9606	23.8842
3	3	0	0	2003-02-23	0.0315876	35.7086	34.0785	35.9234	29.7633	30.4373	29.4266	31.0651	29.0198	25.7672	26.2366	24.083
3	3	0	0	2003-02-24	0.0315876	38.9578	34.6429	36.8841	30.9956	31.0885	30.2358	31.0295	29.1461	26.0761	26.4952	24.2689
3	3	0	0	2003-02-25	0.0315876	41.8959	35.1204	36.5854	32.1304	31.6969	30.9786	30.8489	29.2671	26.3591	26.7328	24.3899
3	3	0	0	2003-02-26	0.0315876	42.7492	36.3322	36.6849	33.5825	32.5886	31.509	30.7738	29.4923	26.7072	27.018	24.5503
3	3	0	0	2003-02-27	0.0315876	42.361	37.456	36.6393	34.1104	33.4098	31.9059	30.6707	29.7066	27.0269	27.2781	24.6976
3	3	0	0	2003-02-28	0.0315876	41.1326	38.5619	36.6168	34.5877	34.2041	32.2668	30.5824	29.9155	27.3287	27.5101	24.8301
3	3	0	0	2003-03-01	0.0315876	39.9864	39.6123	36.6105	35.0215	34.9608	32.6182	30.5069	30.1208	27.5999	27.6178	24.9531
3	3	0	0	2003-03-02	0.0315876	39.1123	40.6419	36.6379	34.5777	35.6929	32.9791	30.4629	30.3265	27.8561	27.6911	25.0653
3	3	0	0	2003-03-03	0.0315876	37.3889	40.2098	36.8715	34.2227	36.5108	33.4356	30.5059	30.5617	28.1304	27.7541	25.1891
3	3	0	0	2003-03-04	0.0315876	38.6987	40.669	38.0578	34.5156	37.1943	34.3381	30.8753	31.0082	28.5438	27.9297	25.3944
3	3	0	0	2003-03-05	0.0315876	40.1508	40.7821	39.279	34.8623	37.867	35.2424	31.2633	31.4497	28.9447	28.1136	25.5915
3	3	0	0	2003-03-06	0.0315876	42.386	41.3253	40.7246	35.416	38.6615	36.245	31.7374	31.9068	29.3663	28.1712	25.8059
3	3	0	0	2003-03-07	0.0315876	44.9756	42.1815	42.2755	36.0841	38.8242	37.2869	32.2543	32.3923	29.79	28.1712	25.988
3	3	0	0	2003-03-08	0.0315876	47.0545	42.3621	42.679	36.7796	38.9565	38.3148	32.7865	32.8686	30.1972	28.1608	26.164
3	3	0	0	2003-03-09	0.0315876	46.7648	42.8692	42.8875	37.5945	39.1317	38.8349	33.3482	33.3687	30.609	28.1712	26.3427
3	3	0	0	2003-03-10	0.0315876	46.2602	43.3463	42.7977	38.3865	39.3096	39.313	33.8834	33.843	30.9752	28.1874	26.5103
4	4	0	0	2002-03-12	0.139336	6.89878	7.19626	7.89766	8.9413	9.94219	10.0597	12.0301	13.9507	19.7818	23.4071	20.7616
4	4	0	0	2002-03-13	0.139336	6.83277	7.05868	7.65463	8.5956	9.85202	9.88015	11.6677	13.7044	19.4308	23.1405	20.7525
4	4	0	0	2002-03-14	0.139336	6.78197	6.94221	7.44138	8.28206	9.50919	9.72029	11.3317	13.4849	19.0912	22.8906	20.7446
4	4	0	0	2002-03-15	0.139336	6.63876	6.83771	7.24809	8.00219	9.12277	9.58028	11.0292	13.0886	18.7621	22.6564	20.7364
4	4	0	0	2002-03-16	0.139336	6.77618	6.86838	7.16264	7.81555	8.81261	9.502	10.7904	12.7606	18.4704	22.4516	20.7383
4	4	0	0	2002-03-17	0.139336	7.07277	6.98578	7.15508	7.69144	8.56759	9.46395	10.5965	12.4652	18.201	22.222	20.7465
4	4	0	0	2002-03-18	0.139336	7.35947	7.09612	7.15893	7.5808	8.34839	9.43662	10.4265	12.1982	17.9633	21.9956	20.755
4	4	0	0	2002-03-19	0.139336	7.61711	7.19954	7.1672	7.48533	8.14906	9.19381	10.2493	11.9619	17.7472	21.7736	20.7588
4	4	0	0	2002-03-20	0.139336	7.85377	7.24627	7.17639	7.39952	7.97247	8.9113	10.0645	11.7538	17.5514	21.5635	20.7557
4	4	0	0	2002-03-21	0.139336	7.78295	7.27957	7.17325	7.31774	7.80902	8.64103	9.89014	11.5652	17.3236	21.2938	20.7514
4	4	0	0	2002-03-22	0.139336	7.53835	7.30557	7.16996	7.2509	7.66081	8.39608	9.73377	11.3945	17.1071	21.0355	20.7473
4	4	0	0	2002-03-23	0.139336	7.30135	7.33038	7.1645	7.19453	7.52495	8.17389	9.59498	11.2412	16.9061	20.7792	20.7439
4	4	0	0	2002-03-24	0.139336	7.0795	7.34831	7.15951	7.14527	7.40413	7.97081	9.46913	11.1039	16.7259	20.5328	20.7414
4	4	0	0	2002-03-25	0.139336	7.47882	7.66631	7.32381	7.25201	7.41539	7.89022	9.41587	11.0345	16.5174	20.3405	20.7601
4	4	0	0	2002-03-26	0.139336	7.86177	7.8224	7.47365	7.34539	7.42654	7.81781	9.32833	10.976	16.3291	20.1655	20.7774
4	4	0	0	2002-03-27	0.139336	8.22774	7.88304	7.61294	7.4344	7.44628	7.75532	9.2441	10.9258	16.0684	20.0081	20.7936
4	4	0	0	2002-03-28	0.139336	8.57089	7.9361	7.7439	7.5161	7.46982	7.69925	9.1682	10.6867	15.7737	19.8157	20.8082
4	4	0	0	2002-03-29	0.139336	8.88852	7.98398	7.86169	7.59177	7.49392	7.65155	9.10078	10.4642	15.4434	19.6019	20.8216
4	4	0	0	2002-03-30	0.139336	8.59142	8.03513	7.97467	7.6407	7.51987	7.61138	9.04508	10.2656	15.0984	19.3873	20.8346
4	4	0	0	2002-03-31	0.139336	8.34362	8.10269	7.99611	7.69115	7.54503	7.57938	9.00006	10.0918	14.7368	19.1836	20.8473
4	4	0	0	2002-04-01	0.139336	8.10849	8.1681	7.95817	7.73685	7.56921	7.55666	8.96203	9.93694	14.3806	18.9818	20.8593
4	4	0	0	2002-04-02	0.139336	7.88854	8.22972	7.92025	7.78004	7.59062	7.53957	8.93114	9.79996	14.0512	18.7973	20.8705
4	4	0	0	2002-04-03	0.139336	7.69534	8.29189	7.88779	7.82013	7.61248	7.52749	8.7585	9.65892	13.755	18.6233	20.881
4	4	0	0	2002-04-04	0.139336	7.50255	8.04699	7.85761	7.85665	7.61304	7.51701	8.56008	9.51282	13.4854	18.4569	20.8907
4	4	0	0	2002-04-05	0.139336	7.31428	7.82894	7.83987	7.82566	7.61573	7.50659	8.37395	9.37759	13.1896	18.2776	20.9002
4	4	0	0	2002-04-06	0.139336	7.13905	7.62374	7.8251	7.7534	7.61727	7.49754	8.20573	9.25659	12.9221	17.9991	20.909
4	4	0	0	2002-04-07	0.139336	6.97839	7.43346	7.8126	7.68479	7.61971	7.48853	8.05344	9.14937	12.6763	17.7239	20.9175
4	4	0	0	2002-04-08	0.139336	6.82967	7.26251	7.80449	7.62323	7.62203	7.48204	7.91537	9.05298	12.4009	17.4566	20.8832
4	4	0	0	2002-04-09	0.139336	6.69349	7.09803	7.59581	7.56658	7.62403	7.45976	7.79208	8.96088	12.1712	17.1936	20.6535
4	4	0	0	2002-04-10	0.139336	6.55808	6.9362	7.40531	7.51945	7.57214	7.43947	7.6803	8.84763	11.9622	16.9539	20.4258
4	4	0	0	2002-04-11	0.139336	6.52878	6.83393	7.25877	7.50101	7.50847	7.43583	7.5898	8.60886	11.7791	16.6953	20.2128
4	4	0	0	2002-04-12	0.139336	8.93544	7.95693	7.93411	8.09331	7.93491	7.83897	7.77757	8.72077	11.7492	16.5329	20.0802
4	4	0	0	2002-04-13	0.139336	12.5316	9.68061	9.01887	8.98627	8.60489	8.44027	8.10731	8.94141	11.8033	16.4284	20.0007
4	4	0	0	2002-04-14	0.139336	17.2258	11.9596	10.474	10.0034	9.49842	9.22431	8.56558	9.2634	11.8005	16.3776	19.97
4	4	0	0	2002-04-15	0.139336	22.9405	14.7493	12.271	11.2891	10.6036	10.1335	9.14324	9.67886	11.8849	16.3862	19.988
4	4	0	0	2002-04-16	0.139336	29.4969	18.0128	14.3882	12.8183	11.9002	11.1732	9.83381	10.1797	12.0345	16.444	20.0122
4	4	0	0	2002-04-17	0.139336	33.5048	21.2201	16.4729	14.3268	13.1756	12.1965	10.5174	10.6776	12.1977	16.5217	20.0358
4	4	0	0	2002-04-18	0.139336	36.067	24.2993	18.4761	15.7809	14.4025	13.1819	11.177	11.049	12.3686	16.6059	20.0551
4	4	0	0	2002-04-19	0.139336	37.1757	27.2006	20.3649	17.1493	15.4378	14.1112	11.7996	11.3724	12.5396	16.6914	20.0729
4	4	0	0	2002-04-20	0.139336	36.9523	29.9457	22.1499	18.441	16.4215	14.9949	12.3877	11.679	12.7084	16.7415	20.034
4	4	0	0	2002-04-21	0.139336	35.6815	32.5899	23.9027	19.7118	17.3912	15.864	12.966	11.9912	12.8843	16.7963	20.0013
4	4	0	0	2002-04-22	0.139336	34.217	33.8603	25.552	20.9086	18.3046	16.6824	13.5097	12.2892	13.0549	16.8502	19.9599
4	4	0	0	2002-04-23	0.139336	32.6901	34.3788	27.0964	22.0298	19.1629	17.4504	14.0201	12.5717	13.2194	16.907	19.9163
4	4	0	0	2002-04-24	0.138936	31.2542	34.2152	28.5521	23.0874	19.9704	18.0739	14.4905	12.8432	13.381	16.9066	19.8872
4	4	0	0	2002-04-25	0.138936	29.897	33.4232	29.93	24.087	20.7325	18.6677	14.9364	13.1039	13.5399	16.9137	19.8661
4	4	0	0	2002-04-26	0.138936	28.4456	32.0658	31.2085	25.0385	21.4587	19.2337	15.36	13.3556	13.6951	16.8597	19.8532
4	4	0	0	2002-04-27	0.138936	27.073	30.6449	31.5978	25.9323	22.1414	19.7659	15.7586	13.5937	13.7131	16.7717	19.8057
4	4	0	0	2002-04-28	0.138936	25.8433	29.2684	31.5341	26.7835	22.7927	20.2765	16.1382	13.8251	13.7349	16.6517	19.7368
4	4	0	0	2002-04-29	0.138936	24.6843	27.9691	31.0382	27.585	23.4067	20.756	16.4956	14.0448	13.7624	16.5128	19.661
4	4	0	0	2002-04-30	0.138936	23.5872	26.7407	30.1431	28.3439	23.9867	21.208	16.804	14.2548	13.7972	16.3546	19.5885
4	4	0	0	2002-05-01	0.138936	22.4694	25.4576	28.8654	29.0235	24.5247	21.627	17.0708	14.4529	13.8336	16.1922	19.5109
4	4	0	0	2002-05-02	0.138936	21.4959	24.2824	27.5953	29.072	25.0446	22.0336	17.3291	14.6477	13.8778	16.0468	19.4445
4	4	0	0	2002-05-03	0.138936	20.5607	23.2021	26.3648	28.7906	25.5389	22.4207	17.5763	14.8352	13.9128	15.9214	19.3828
4	4	0	0	2002-05-04	0.138936	19.6996	22.1916	25.2137	28.204	26.0081	22.789	17.8119	15.0141	13.9382	15.8113	19.3233
4	4	0	0	2002-05-05	0.138936	18.9015	21.2425	24.1302	27.333	26.4555	23.1393	18.0395	15.184	13.9648	15.677	19.25
4	4	0	0	2002-05-06	0.138936	18.2547	20.3636	23.0581	26.2148	26.8701	23.4799	18.2616	15.3497	13.9976	15.5616	19.0952
4	4	0	0	2002-05-07	0.138936	17.5812	19.5378	22.0499	25.0917	26.7737	23.8007	18.4713	15.5057	14.0331	15.4573	18.9393
4	4	0	0	2002-05-08	0.138936	16.9079	18.7348	21.1048	24.0027	26.4141	24.1005	18.6685	15.6523	14.0688	15.3258	18.7853
4	4	0	0	2002-05-09	0.138936	16.303	18.002	20.2282	22.9875	25.8236	24.3906	18.7924	15.7863	14.1041	15.226	18.633
4	4	0	0	2002-05-10	0.138936	15.7392	17.3204	19.4097	22.0332	25.0171	24.6695	18.9148	15.9156	14.1216	15.139	18.497
4	4	0	0	2002-05-11	0.138936	15.1766	16.7166	18.634	21.0879	24.0075	24.9212	19.0337	16.0396	14.1389	15.0646	18.3405
4	4	0	0	2002-05-12	0.138936	14.6548	16.118	17.9099	20.2013	23.0042	24.7538	19.1473	16.1575	14.1578	15.0004	18.1771
4	4	0	0	2002-05-13	0.138936	14.1927	15.5514	17.2212	19.3766	22.0409	24.3775	19.2578	16.27	14.1793	14.9469	18.0182
4	4	0	0	2002-05-14	0.138936	13.7246	15.0139	16.5755	18.6026	21.1316	23.8069	19.3626	16.3767	14.2038	14.8021	17.8635
4	4	0	0	2002-05-15	0.138936	13.2625	14.5018	15.9685	17.8731	20.2771	23.058	19.4615	16.4561	14.2307	14.6778	17.7203
4	4	0	0	2002-05-16	0.138936	12.8211	13.9998	15.4174	17.18	19.4341	22.1405	19.5575	16.5187	14.2597	14.5614	17.5836
4	4	0	0	2002-05-17	0.138936	12.4211	13.5367	14.8844	16.5376	18.644	21.2388	19.6509	16.5793	14.2909	14.4582	17.4653
4	4	0	0	2002-05-18	0.138936	12.0285	13.1106	14.3757	15.9221	17.9075	20.3718	19.7393	16.6375	14.2489	14.3691	17.3589
4	4	0	0	2002-05-19	0.138936	11.6564	12.6907	13.894	15.3463	17.2146	19.554	19.8241	16.6937	14.1921	14.2933	17.2639
4	4	0	0	2002-05-20	0.138936	11.3122	12.2863	13.4381	14.8043	16.5611	18.7831	19.9055	16.7502	14.1397	14.2271	17.1498
4	4	0	0	2002-05-21	0.138936	10.9795	11.8994	12.9924	14.3081	15.9407	18.0252	19.9841	16.8054	14.0949	14.1694	17.042
4	4	0	0	2002-05-22	0.138936	10.66	11.5394	12.5779	13.8287	15.3611	17.3141	20.0599	16.8591	14.0567	14.1196	16.9429
4	4	0	0	2002-05-23	0.138936	10.3781	11.2032	12.1991	13.3773	14.8135	16.6529	20.1337	16.9125	14.0245	14.0777	16.8561
4	4	0	0	2002-05-24	0.138936	10.1075	10.8819	11.8296	12.9487	14.2989	16.0298	20.2037	16.9128	13.9979	14.0431	16.7311
4	4	0	0	2002-05-25	0.138936	9.84759	10.5789	11.4735	12.5405	13.8133	15.4413	20.2708	16.9156	13.9757	14.0152	16.6192
4	4	0	0	2002-05-26	0.138936	9.59616	10.2871	11.1331	12.1444	13.3667	14.8824	20.3247	16.9194	13.9574	13.9921	16.4643
4	4	0	0	2002-05-27	0.138936	9.35257	10.0064	10.8112	11.7717	12.9336	14.3607	20.1061	16.9243	13.9419	13.8749	16.2895
4	4	0	0	2002-05-28	0.138936	12.5709	11.4749	11.6592	12.2928	13.2158	14.4399	20.1376	17.2192	14.1227	13.9113	16.2093
4	4	0	0	2002-05-29	0.138936	15.6805	12.8943	12.4819	12.7924	13.4944	14.529	20.0319	17.5036	14.2987	13.954	16.116
4	4	0	0	2002-05-30	0.138936	18.6503	14.2487	13.2696	13.2679	13.7622	14.6189	19.7942	17.7745	14.4689	14.0026	16.0074
4	4	0	0	2002-05-31	0.138936	21.4849	15.5408	14.02	13.7205	14.0118	14.7191	19.4348	18.0342	14.6343	14.055	15.8976
4	4	0	0	2002-06-01	0.138936	24.1095	16.731	14.7073	14.1356	14.2394	14.7963	19.0622	18.276	14.7898	14.1074	15.7967
4	4	0	0	2002-06-02	0.138936	23.4446	18.0077	15.4648	14.6056	14.5231	14.9207	18.7356	18.5318	14.9564	14.1648	15.7213
4	4	0	0	2002-06-03	0.138936	22.9651	19.3228	16.2511	15.1026	14.8269	15.0729	18.4529	18.792	15.1263	14.2218	15.7722
4	4	0	0	2002-06-04	0.138936	22.6004	20.6253	17.0327	15.6023	15.1344	15.2352	18.1997	19.0485	15.2937	14.2824	15.6972
4	4	0	0	2002-06-05	0.138936	22.2853	21.8851	17.7889	16.0864	15.4334	15.3908	17.946	19.2964	15.456	14.3459	15.7544
4	4	0	0	2002-06-06	0.138936	22.0935	23.1014	18.5185	16.5538	15.7272	15.5484	17.7154	19.5356	15.6125	14.4118	15.7026
4	4	0	0	2002-06-07	0.138936	21.6872	22.5659	19.2342	17.0203	16.0219	15.7172	17.5129	19.7699	15.7665	14.481	15.6311
4	4	0	0	2002-06-08	0.138936	21.1965	22.0808	19.9474	17.4875	16.3215	15.8885	17.3354	20.0006	15.9129	14.5502	15.5856
4	4	0	0	2002-06-09	0.138936	20.7045	21.6524	20.6518	17.9506	16.6227	16.0627	17.1781	20.2273	16.0573	14.6069	15.5509
4	4	0	0	2002-06-10	0.138936	20.2318	21.2584	21.334	18.3996	16.9154	16.2332	17.0333	20.4383	16.1967	14.6625	15.5253
4	4	0	0	2002-06-11	0.138936	19.8043	20.9489	22.0024	18.84	17.2038	16.4067	16.9077	20.4413	16.3332	14.7199	15.5087
4	4	0	0	2002-06-12	0.138936	19.381	20.5341	21.5043	19.2709	17.4925	16.5817	16.7948	20.3406	16.4664	14.7799	15.5009
4	4	0	0	2002-06-13	0.138936	18.9145	20.0556	21.0254	19.6892	17.7729	16.7536	16.6944	20.1413	16.595	14.8413	15.4195
4	4	0	0	2002-06-14	0.138936	18.4098	19.5571	20.5716	20.0912	18.0424	16.9206	16.6031	19.8496	16.7036	14.9031	15.3535
4	4	0	0	2002-06-15	0.138936	17.9126	19.0721	20.1432	20.4786	18.3022	17.0816	16.5272	19.4729	16.7989	14.9652	15.2925
4	4	0	0	2002-06-16	0.138936	17.391	18.5976	19.7629	20.8495	18.5501	17.2351	16.4518	19.0985	16.8904	15.027	15.2406
4	4	0	0	2002-06-17	0.138936	16.8507	18.1158	19.3063	20.3408	18.7869	17.3855	16.3826	18.7393	16.9795	15.0331	15.1995
4	4	0	0	2002-06-18	0.138936	16.3176	17.616	18.8095	19.8484	19.0149	17.5304	16.3185	18.4032	17.0652	15.0267	15.1677
4	4	0	0	2002-06-19	0.138936	15.8218	17.1158	18.3121	19.3841	19.2373	17.6723	16.2608	18.0889	17.1502	15.0229	15.1432
4	4	0	0	2002-06-20	0.138936	15.3406	16.6266	17.8283	18.9425	19.451	17.8086	16.2033	17.7777	17.2324	15.0233	15.1243
4	4	0	0	2002-06-21	0.137896	15.6765	16.5337	17.6239	18.7413	19.8149	18.0712	16.2403	17.5536	17.3558	15.0603	15.137
4	4	0	0	2002-06-22	0.137896	16.0315	16.4411	17.4211	18.4876	19.479	18.3276	16.2852	17.3511	17.4768	15.1003	15.1547
4	4	0	0	2002-06-23	0.137896	16.4102	16.3639	17.2141	18.2097	19.1607	18.5807	16.3304	17.1662	17.5614	15.1436	15.1777
4	4	0	0	2002-06-24	0.137896	16.7717	16.2968	17.0011	17.927	18.8617	18.8264	16.3755	16.995	17.6452	15.1883	15.2046
4	4	0	0	2002-06-25	0.137016	17.1218	16.2312	16.7916	17.6517	18.5783	19.0629	16.4193	16.834	17.7265	15.2337	15.2333
4	4	0	0	2002-06-26	0.135416	16.7248	16.2007	16.5974	17.3991	18.338	19.2999	16.4703	16.6912	17.8088	15.2814	15.187
4	4	0	0	2002-06-27	0.135416	16.3535	16.1925	16.4119	17.1541	18.0608	18.9581	16.5252	16.5601	17.8915	15.3315	15.1476
4	4	0	0	2002-06-28	0.13515	15.999	16.2046	16.2423	16.9103	17.7676	18.6337	16.5832	16.4424	17.9729	15.3825	15.117
4	4	0	0	2002-06-29	0.131603	15.6672	16.2194	16.0869	16.6676	17.475	18.3292	16.6427	16.3351	18.052	15.4339	15.095
4	4	0	0	2002-06-30	0.131603	15.364	16.2429	15.9421	16.4347	17.1941	18.0427	16.7018	16.242	18.1296	15.4863	15.0796
4	4	0	0	2002-07-01	0.131603	15.0846	15.9047	15.8286	16.2192	16.9362	17.7958	16.7662	16.1571	18.2085	15.5413	15.0722
4	4	0	0	2002-07-02	0.131603	14.788	15.5708	15.7244	16.006	16.6809	17.5153	16.8318	16.0791	18.2855	15.596	15.0619
4	4	0	0	2002-07-03	0.131603	14.493	15.246	15.6341	15.805	16.4269	17.2218	16.8983	16.0084	18.3612	15.6501	15.0489
4	4	0	0	2002-07-04	0.131603	14.2059	14.9365	15.5483	15.6167	16.1753	16.9302	16.9643	15.9438	18.4349	15.7028	15.039
4	4	0	0	2002-07-05	0.131603	13.9501	14.657	15.4786	15.4441	15.9378	16.6535	17.0319	15.8832	18.508	15.7554	15.0345
4	4	0	0	2002-07-06	0.127163	13.6452	14.3649	15.1515	15.2828	15.7044	16.3877	17.098	15.8291	18.5789	15.8063	15.0341
4	4	0	0	2002-07-07	0.127163	13.3455	14.0667	14.829	15.1296	15.4739	16.1251	17.1614	15.7822	18.6475	15.8562	15.0368
4	4	0	0	2002-07-08	0.127163	13.0583	13.7757	14.5168	14.9902	15.2556	15.8655	17.2261	15.7381	18.7148	15.9011	15.0403
4	4	0	0	2002-07-09	0.127163	12.7701	13.488	14.2144	14.8538	15.0474	15.6078	17.2891	15.6964	18.78	15.9449	15.0341
4	4	0	0	2002-07-10	0.127163	12.4429	13.1965	13.919	14.7197	14.8439	15.3553	17.3482	15.6553	18.8365	15.9864	15.0281
4	4	0	0	2002-07-11	0.127163	12.0869	12.866	13.6055	14.3853	14.6436	15.1015	17.4018	15.6152	18.7539	16.0252	15.0233
4	4	0	0	2002-07-12	0.127163	11.7444	12.5449	13.2926	14.0578	14.4526	14.8523	17.0696	15.5781	18.6038	16.063	15.0215
4	4	0	0	2002-07-13	0.108041	11.4078	12.2331	12.9864	13.7396	14.2736	14.6143	16.7513	15.5451	18.3916	16.0998	15.0229
4	4	0	0	2002-07-14	0.100761	11.0913	11.9307	12.6891	13.4336	14.1013	14.388	16.4492	15.5154	18.1219	16.1247	15.0272
4	4	0	0	2002-07-15	0.0930812	10.8175	11.6302	12.4035	13.1436	13.9393	14.1728	16.1629	15.4883	17.7989	16.1424	15.0338
4	4	0	0	2002-07-16	0.0930812	10.6089	11.3479	12.1136	12.8564	13.63	13.9712	15.9017	15.4642	17.482	16.1606	15.0429
4	4	0	0	2002-07-17	0.0930812	10.405	11.0747	11.8316	12.5707	13.3273	13.778	15.6207	15.4429	17.1781	16.1791	15.0091
4	4	0	0	2002-07-18	0.0930812	10.2794	10.8436	11.5818	12.3097	13.0475	13.608	15.3418	15.4303	16.8974	16.2009	14.97
4	4	0	0	2002-07-19	0.081725	10.4265	10.7589	11.4293	12.1235	12.8322	13.4888	15.0965	15.4417	16.6481	16.2348	14.9936
4	4	0	0	2002-07-20	0.081725	10.6567	10.7371	11.3057	11.9668	12.6462	13.3922	14.8709	15.4615	16.4085	16.2724	14.9746
4	4	0	0	2002-07-21	0.081725	11.033	10.8209	11.2429	11.8435	12.4917	13.1972	14.6728	15.4953	16.1941	16.3162	14.9653
4	4	0	0	2002-07-22	0.081725	13.7853	12.0951	11.9782	11.8994	12.8136	13.4036	14.7428	15.7267	16.1278	16.4585	15.0385
4	4	0	0	2002-07-23	0.081725	16.4191	13.3493	12.7021	11.9303	13.1315	13.6095	14.8111	15.9562	16.0732	16.5734	15.1143
4	4	0	0	2002-07-24	0.080925	18.697	14.5618	13.405	11.9478	13.4381	13.8097	14.8734	16.1791	16.0259	16.6863	15.1901
4	4	0	0	2002-07-25	0.080925	20.7936	15.7253	14.0893	11.9643	13.7322	14.0041	14.9333	16.3945	15.9834	16.7959	15.2653
4	4	0	0	2002-07-26	0.080925	22.6144	16.8237	14.7521	11.9737	13.9977	14.1788	14.985	16.6005	15.9464	16.9013	15.3384
4	4	0	0	2002-07-27	0.080925	22.0316	17.9084	15.4074	12.3795	14.2623	14.3499	15.0373	16.5151	15.916	17.0061	15.4128
4	4	0	0	2002-07-28	0.0558584	21.4437	18.9315	16.0474	12.7755	14.5217	14.5169	15.0921	16.4364	15.8932	17.1088	15.487
4	4	0	0	2002-07-29	0.0517831	20.8419	19.7695	16.6554	13.1521	14.7654	14.6721	15.1438	16.3618	15.8734	17.207	15.5591
4	4	0	0	2002-07-30	0.0517831	20.2894	20.5415	17.2466	13.5272	15	14.825	15.1974	16.2949	15.8623	17.3034	15.6316
4	4	0	0	2002-07-31	0.0517831	19.7145	21.1645	17.7872	13.8806	15.2115	14.9505	15.2432	16.2343	15.8475	17.394	15.7007
4	4	0	0	2002-08-01	0.049348	19.1645	20.5981	18.3271	14.2345	15.4261	15.0794	15.2943	16.1585	15.8385	17.484	15.7703
4	4	0	0	2002-08-02	0.049348	18.6591	20.0513	18.8407	14.5883	15.6418	15.2112	15.3522	16.0776	15.8353	17.5738	15.84
4	4	0	0	2002-08-03	0.041648	18.2277	19.5348	19.2556	14.9362	15.8568	15.3425	15.411	15.9974	15.836	17.6618	15.9083
4	4	0	0	2002-08-04	0.040441	17.7315	19.0105	19.6049	15.2557	16.058	15.4553	15.463	15.9154	15.8333	17.7448	15.9729
4	4	0	0	2002-08-05	0.0379877	17.3461	18.5303	19.8917	15.5648	16.2634	15.5673	15.4287	15.8386	15.8344	17.826	16.0361
4	4	0	0	2002-08-06	0.0379877	17.2366	18.2005	19.4775	15.9424	16.5246	15.7281	15.4283	15.7876	15.8566	17.9176	16.1081
4	4	0	0	2002-08-07	0.029148	17.0677	17.8634	19.0568	16.2854	16.7739	15.8813	15.4252	15.7335	15.8779	18.006	16.1744
4	4	0	0	2002-08-08	0.029148	16.8481	17.5379	18.6392	16.5416	17.0083	16.0218	15.4195	15.676	15.8975	18.0905	16.2379
4	4	0	0	2002-08-09	0.029148	16.6881	17.2098	18.2363	16.7636	17.2319	16.1628	15.4149	15.6202	15.9171	18.1681	16.2993
4	4	0	0	2002-08-10	0.029148	16.4952	16.9207	17.8519	16.9305	17.4406	16.3021	15.4032	15.5628	15.9368	18.141	16.3582
4	4	0	0	2002-08-11	0.0273564	15.9634	16.6	17.4548	16.487	17.6362	16.431	15.3849	15.5028	15.955	18.0607	16.4141
4	4	0	0	2002-08-12	0.0273564	15.453	16.2603	17.0598	16.0437	17.8085	16.5536	15.3646	15.4451	15.9739	17.9322	16.4681
4	4	0	0	2002-08-13	0.0267564	14.9444	15.8963	16.6734	15.6035	17.9118	16.6643	15.3392	15.3872	15.991	17.7574	16.2979
4	4	0	0	2002-08-14	0.0262675	14.4355	15.5618	16.285	15.174	17.9876	16.7659	15.3117	15.3304	16.0067	17.5406	16.3324
4	4	0	0	2002-08-15	0.0249675	13.9395	15.2173	15.927	14.7618	18.0219	16.8572	15.2759	15.2752	16.0211	17.3258	16.3653
4	4	0	0	2002-08-16	0.0249675	13.475	14.7192	15.5583	14.3478	17.5742	16.9427	15.2393	15.2215	16.0354	17.1193	16.3972
4	4	0	0	2002-08-17	0.0249675	12.9538	14.2033	15.1581	13.9213	17.1152	16.9994	15.1936	15.1648	16.0459	16.9229	16.4259
4	4	0	0	2002-08-18	0.0249675	12.4243	13.6844	14.7389	13.4991	16.6572	16.9972	15.1414	15.1041	16.0528	16.7354	16.4526
4	4	0	0	2002-08-19	0.0210475	11.9024	13.169	14.342	13.0773	16.2094	16.9735	15.0842	15.0439	16.0581	16.5497	16.4779
4	4	0	0	2002-08-20	0.0210475	11.4245	12.682	13.9531	12.6893	15.784	16.922	15.0291	14.9209	16.0636	16.3761	16.5027
4	4	0	0	2002-08-21	0.0199846	10.9427	12.2088	13.4603	12.2923	15.3564	16.4689	14.9721	14.7974	16.0667	16.2131	16.5259
4	4	0	0	2002-08-22	0.0199846	10.5249	11.7393	12.9772	11.8877	14.9316	16.017	14.9121	14.6743	16.0691	16.0592	16.5274
4	4	0	0	2002-08-23	0.0199846	10.1651	11.2947	12.5113	11.4834	14.5219	15.5752	14.8518	14.5536	16.0705	15.9132	16.5294
4	4	0	0	2002-08-24	0.019318	9.82618	10.8643	12.0547	11.101	14.1168	15.1455	14.7934	14.4359	16.0708	15.7739	16.5312
4	4	0	0	2002-08-25	0.0188127	9.47752	10.451	11.6139	10.7221	13.7366	14.7329	14.7393	14.317	16.0706	15.643	16.5329
4	4	0	0	2002-08-26	0.0188127	9.15942	10.0511	11.1924	10.2731	13.3554	14.3236	14.6849	14.198	15.8773	15.5179	16.535
4	4	0	0	2002-08-27	0.0124127	8.86404	9.69447	10.7809	9.83689	12.9727	13.9204	14.6293	14.0798	15.6904	15.4	16.5365
4	4	0	0	2002-08-28	0.0124127	8.57403	9.36958	10.3878	9.41492	12.5912	13.5306	14.5722	13.9623	15.5107	15.2877	16.5371
4	4	0	0	2002-08-29	0.0118794	8.30334	9.06475	10.0106	9.0048	12.2311	13.1478	14.5141	13.8475	15.3385	15.1836	16.5377
4	4	0	0	2002-08-30	0.0118794	8.0458	8.76166	9.64928	8.60979	11.8765	12.7881	14.4545	13.7318	15.1781	15.0827	16.5382
4	4	0	0	2002-08-31	0.0118794	7.81257	8.48601	9.30487	8.23536	11.4706	12.4316	14.3968	13.6167	15.0088	14.9867	16.5389
4	4	0	0	2002-09-01	0.0118794	7.5978	8.23091	8.99558	7.87307	11.0787	12.0769	14.3314	13.5051	14.8366	14.8957	16.5397
4	4	0	0	2002-09-02	0.0118794	7.4225	7.99828	8.72056	7.53443	10.7061	11.7297	14.2384	13.3973	14.6675	14.8094	16.5407
4	4	0	0	2002-09-03	0.0118794	7.27378	7.78855	8.46777	7.21437	10.3483	11.4049	14.1382	13.2912	14.5045	14.7261	16.5421
4	4	0	0	2002-09-04	0.0118794	7.13905	7.59244	8.22078	6.90968	10.0053	11.087	14.0219	13.1883	14.3473	14.6476	16.5435
4	4	0	0	2002-09-05	0.00835936	7.00565	7.4091	7.99254	6.61804	9.67907	10.7265	13.6435	13.0883	14.1931	14.5741	16.5448
4	4	0	0	2002-09-06	0.00835936	6.87548	7.23664	7.77913	6.3535	9.36319	10.3782	13.271	12.9899	14.041	14.5029	16.5458
4	4	0	0	2002-09-07	0.00835936	7.12073	7.27162	7.70576	6.20856	9.14134	10.1085	12.9521	12.9264	13.9128	14.4503	16.5594
4	4	0	0	2002-09-08	0.00835936	7.92234	7.59806	7.83315	6.21934	9.04562	9.94391	12.7081	12.9145	13.8207	14.4238	16.5886
4	4	0	0	2002-09-09	0.00742673	14.6815	10.9102	9.95542	7.7239	10.1537	10.7846	13.1404	13.4044	14.0626	14.6487	16.7351
4	4	0	0	2002-09-10	0.00742673	20.9744	13.99	11.9308	9.12592	11.1789	11.5616	13.526	13.8574	14.2816	14.8567	16.8262
4	4	0	0	2002-09-11	0.00807848	26.7206	16.7981	13.7314	10.4024	12.1166	12.2561	13.8574	14.266	14.4747	15.0444	16.8622
4	4	0	0	2002-09-12	0.00894515	31.7211	19.421	15.4215	11.5975	13.0007	12.9047	14.1609	14.6456	14.6523	15.2194	16.8522
4	4	0	0	2002-09-13	0.0208013	35.704	21.8181	16.97	12.6913	13.8079	13.4903	14.4219	14.9892	14.8096	15.3777	16.7958
4	4	0	0	2002-09-14	0.0208013	33.3232	23.9992	18.3792	13.6837	14.5322	14.0142	14.6518	15.2968	14.9475	15.5194	16.7288
4	4	0	0	2002-09-15	0.022593	30.9939	25.9842	19.6579	14.5846	15.1892	14.4815	14.8404	15.5731	15.0674	15.6469	16.657
4	4	0	0	2002-09-16	0.022593	29.1396	27.9283	20.9106	15.4704	15.8388	14.9532	15.0215	15.8374	15.1868	15.7727	16.5943
4	4	0	0	2002-09-17	0.022593	27.3327	29.5246	22.0565	16.286	16.4333	15.3886	15.172	16.0541	15.2916	15.8867	16.5314
4	4	0	0	2002-09-18	0.022113	25.6893	30.7008	23.1107	17.0394	16.9818	15.7891	15.3068	16.2424	15.385	15.9908	16.4629
4	4	0	0	2002-09-19	0.022113	24.2437	28.7752	24.08	17.7329	17.4852	16.1504	15.4181	16.3976	15.4235	16.0854	16.3963
4	4	0	0	2002-09-20	0.0245663	23.0046	26.9965	24.9908	18.3823	17.9581	16.4916	15.4812	16.3413	15.4547	16.1729	16.3341
4	4	0	0	2002-09-21	0.0245663	21.6067	25.3728	25.8202	18.9721	18.3869	16.7997	15.5256	16.2695	15.4755	16.2517	16.2726
4	4	0	0	2002-09-22	0.0245663	20.338	23.8312	26.4628	19.515	18.7863	17.0841	15.5599	16.1909	15.4897	16.3239	16.2127
4	4	0	0	2002-09-23	0.0245663	19.1095	22.408	26.8404	19.9988	19.1434	17.3367	15.5761	16.1022	15.4955	16.3873	16.1518
4	4	0	0	2002-09-24	0.0245663	17.9729	21.1127	25.184	20.4428	19.4717	17.5674	15.5829	16.0113	15.493	16.4447	16.0932
4	4	0	0	2002-09-25	0.0245663	16.8225	19.9134	23.6062	20.8372	19.7605	17.7692	15.5769	15.9075	15.4807	16.3503	16.0335
4	4	0	0	2002-09-26	0.0245663	15.7728	18.6963	22.1685	21.1971	20.0226	17.9516	15.5614	15.7971	15.4633	16.2557	15.9757
4	4	0	0	2002-09-27	0.0245663	14.8044	17.5653	20.8247	21.4349	20.2616	18.122	15.544	15.6874	15.4414	16.1635	15.9199
4	4	0	0	2002-09-28	0.0245663	14.4709	16.7911	19.7589	21.6358	20.583	18.3647	15.5799	15.6173	15.4457	16.095	15.8852
4	4	0	0	2002-09-29	0.0257383	14.228	16.1033	18.8161	20.3295	20.8894	18.5978	15.6149	15.554	15.4455	16.033	15.8511
4	4	0	0	2002-09-30	0.0332849	14.0495	15.4371	17.9593	19.1059	21.1692	18.8086	15.6407	15.4812	15.4399	15.9587	15.8165
4	4	0	0	2002-10-01	0.0332849	14.0142	14.8948	17.1314	18.0204	21.4501	19.0211	15.6792	15.41	15.4363	15.8827	15.7861
4	4	0	0	2002-10-02	0.0332849	14.0021	14.4013	16.3806	17.0053	21.638	19.2186	15.7193	15.3352	15.4302	15.8052	15.7566
4	4	0	0	2002-10-03	0.0618579	13.5812	14.026	15.7212	16.1028	21.7145	19.4159	15.7665	15.2715	15.4254	15.7324	15.7294
4	4	0	0	2002-10-04	0.0700468	13.1613	13.6946	15.1227	15.2905	20.5855	19.6014	15.8079	15.2053	15.4185	15.6609	15.7037
4	4	0	0	2002-10-05	0.0951135	12.8713	13.4604	14.5819	14.5753	19.5487	19.7862	15.8551	15.1174	15.4135	15.5914	15.6819
4	4	0	0	2002-10-06	0.0959135	12.5423	13.2782	14.1107	13.872	18.6144	19.9655	15.9033	15.033	15.4077	15.5222	15.629
4	4	0	0	2002-10-07	0.0983486	12.1996	13.1009	13.6674	13.2233	17.7339	20.0651	15.9453	14.9479	15.3985	15.4509	15.6068
4	4	0	0	2002-10-08	0.102789	13.3933	13.4873	13.8151	13.0272	17.2505	20.3277	16.1629	14.9969	15.4781	15.4474	15.6382
4	4	0	0	2002-10-09	0.10563	14.5571	13.8592	13.9822	12.8693	16.8334	19.5807	16.3723	15.0438	15.5558	15.4423	15.6687
4	4	0	0	2002-10-10	0.107082	15.69	14.2807	14.2036	12.7469	16.4878	18.9055	16.5807	15.0947	15.6328	15.4377	15.7001
4	4	0	0	2002-10-11	0.107082	16.6877	14.6149	14.4147	12.6428	16.1247	18.2933	16.7727	15.1358	15.701	15.4294	15.7278
4	4	0	0	2002-10-12	0.10727	17.5676	14.8835	14.5897	12.5304	15.7818	17.7061	16.9446	15.1665	15.7584	15.4158	15.7503
4	4	0	0	2002-10-13	0.107611	16.7247	15.059	14.5664	12.4305	15.4562	17.1629	17.0986	15.1877	15.8064	15.398	15.7683
4	4	0	0	2002-10-14	0.105408	15.8425	15.1998	14.5203	12.3352	15.1535	16.6683	17.2386	15.2024	15.8465	15.3777	15.7827
4	4	0	0	2002-10-15	0.105408	14.8689	15.2795	14.4768	12.2579	14.8609	16.218	17.3647	15.2108	15.8807	15.355	15.7947
4	4	0	0	2002-10-16	0.106008	13.9549	15.3213	14.3949	12.1876	14.5949	15.7632	17.479	15.2192	15.9052	15.3309	15.8044
4	4	0	0	2002-10-17	0.106008	13.1375	15.3524	14.3015	12.1146	14.3415	15.3411	17.5796	15.2259	15.9089	15.3039	15.8112
4	4	0	0	2002-10-18	0.106542	12.3959	14.5603	14.1713	11.9117	14.1132	14.9462	17.6678	15.2288	15.903	15.2753	15.8156
4	4	0	0	2002-10-19	0.106542	11.7062	13.7743	14.0352	11.7047	13.899	14.5789	17.746	15.2258	15.8839	15.2123	15.8176
4	4	0	0	2002-10-20	0.106542	11.0531	12.961	13.8706	11.5088	13.7067	14.2263	17.8144	15.22	15.729	15.1476	15.8172
4	4	0	0	2002-10-21	0.106542	11.5334	12.7441	14.0587	11.5675	13.7465	14.0846	17.9965	15.3033	15.6338	15.1278	15.8519
4	4	0	0	2002-10-22	0.106542	12.0431	12.5903	14.2494	11.6249	13.79	13.9584	18.1264	15.3824	15.5393	15.1069	15.8844
4	4	0	0	2002-10-23	0.106542	12.5123	12.4541	13.8776	11.6445	13.7215	13.8464	18.1777	15.4527	15.4429	15.0832	15.9127
4	4	0	0	2002-10-24	0.106542	12.9526	12.3293	13.5004	11.6525	13.6439	13.7413	17.554	15.5154	15.3472	15.0552	15.9376
4	4	0	0	2002-10-25	0.106542	13.3044	12.1787	13.0755	11.617	13.5576	13.6396	16.9622	15.5654	15.2441	15.0206	15.8416
4	4	0	0	2002-10-26	0.107022	12.5467	12.0401	12.6783	11.5686	13.453	13.5465	16.4216	15.6102	15.1395	14.9839	15.7474
4	4	0	0	2002-10-27	0.107022	11.7918	11.9174	12.3241	11.523	13.3479	13.457	15.9119	15.6505	15.0365	14.9455	15.6557
4	4	0	0	2002-10-28	0.107474	11.0889	11.8006	11.999	11.0684	13.2231	13.2827	15.4417	15.6848	14.9317	14.905	15.5662
4	4	0	0	2002-10-29	0.109676	10.4237	11.6881	11.6941	10.6192	13.0964	13.1072	15.0103	15.7136	14.831	14.8609	15.4814
4	4	0	0	2002-10-30	0.109676	9.93517	11.6197	11.4308	10.1783	12.9703	12.9538	14.6223	15.7423	14.7314	14.8183	15.3914
4	4	0	0	2002-10-31	0.109676	9.68825	11.1175	11.2561	9.81877	12.8822	12.8255	14.2607	15.7844	14.6412	14.7837	15.3048
4	4	0	0	2002-11-01	0.111276	12.3258	12.0588	12.0536	10.2125	13.3732	13.1775	14.2454	16.0592	14.7086	14.8671	15.3132
4	4	0	0	2002-11-02	0.117676	15.5888	13.3389	13.0634	10.7844	13.6621	13.6173	14.3185	16.3777	14.8127	14.9734	15.3429
4	4	0	0	2002-11-03	0.117676	19.2484	14.836	14.2082	11.4706	14.0346	14.1217	14.4555	16.7227	14.9367	15.0944	15.3866
4	4	0	0	2002-11-04	0.117676	22.6197	16.2774	15.2864	12.116	14.3563	14.5785	14.5796	17.0435	15.0304	15.2048	15.4224
4	4	0	0	2002-11-05	0.117676	25.3145	17.5014	15.8498	12.6587	14.6075	14.9542	14.6731	17.321	15.0993	15.2943	15.4422
4	4	0	0	2002-11-06	0.125356	27.8999	20.1128	17.3392	13.9031	15.4396	15.7942	15.0853	17.7908	15.3226	15.4975	15.5531
4	4	0	0	2002-11-07	0.13051	31.0646	23.3266	19.2474	15.4516	16.5302	16.5625	15.6468	18.3062	15.6115	15.7492	15.704
4	4	0	0	2002-11-08	0.13091	33.8857	26.567	21.186	17.0155	17.6433	17.3431	16.2228	18.323	15.9029	16.0026	15.856
4	4	0	0	2002-11-09	0.13091	36.5783	29.5991	23.0444	18.4973	18.6981	18.06	16.7745	18.3438	16.1757	16.2395	15.9956
4	4	0	0	2002-11-10	0.13091	39.2188	32.2667	24.7405	19.58	19.6604	18.7095	17.2779	18.3624	16.4196	16.4532	16.1189
4	4	0	0	2002-11-11	0.13139	38.889	33.3911	26.3693	20.613	20.5887	19.3468	17.7611	18.3875	16.6525	16.6554	16.2355
4	4	0	0	2002-11-12	0.13139	37.0487	34.0625	27.9047	21.5886	21.463	19.9518	18.1567	18.4185	16.8684	16.8427	16.3423
4	4	0	0	2002-11-13	0.13139	35.081	34.4785	29.4017	22.5451	22.3163	20.5479	18.5387	18.4692	17.0769	17.0219	16.4453
4	4	0	0	2002-11-14	0.13139	33.0945	34.8327	30.762	23.4433	23.1051	21.0964	18.8899	18.5183	17.2653	17.1847	16.5369
4	4	0	0	2002-11-15	0.13139	31.3553	35.2879	31.9631	24.2824	23.6249	21.6096	19.2047	18.5475	17.442	17.3313	16.6202
4	4	0	0	2002-11-16	0.13139	29.3897	34.1362	32.0576	25.0125	24.0579	22.0556	19.4708	18.5594	17.595	17.4456	16.6878
4	4	0	0	2002-11-17	0.13491	27.5731	32.3171	31.8996	25.7098	24.4753	22.4813	19.7114	18.5749	17.739	17.5475	16.7501
4	4	0	0	2002-11-18	0.13491	25.4991	30.2842	31.4852	26.314	24.8256	22.8467	19.9096	18.574	17.8587	17.6246	16.7728
4	4	0	0	2002-11-19	0.138456	23.7046	28.3973	31.1232	26.8853	25.185	23.2049	20.0935	18.5767	17.9743	17.5979	16.7927
4	4	0	0	2002-11-20	0.138456	21.9711	26.6646	30.8486	27.3533	25.51	23.3494	20.2524	18.5781	18.0779	17.5627	16.8056
4	4	0	0	2002-11-21	0.138456	20.5345	24.9633	29.6018	27.0646	25.8065	23.4708	20.397	18.5757	18.1711	17.5222	16.8132
4	4	0	0	2002-11-22	0.138456	19.0578	23.3154	27.8964	26.5769	26.069	23.5723	20.3407	18.5704	18.2518	17.4753	16.8146
4	4	0	0	2002-11-23	0.139336	17.8704	21.6851	26.1475	25.9695	26.315	23.6663	20.2777	18.5649	18.325	17.427	16.8109
4	4	0	0	2002-11-24	0.139336	16.6319	20.1678	24.475	25.3884	26.5245	23.7595	20.1982	18.5606	18.3894	17.3729	16.8019
4	4	0	0	2002-11-25	0.139336	15.4303	18.701	22.9197	24.8823	26.6584	23.8299	20.1128	18.5494	18.4427	17.3121	16.7867
4	4	0	0	2002-11-26	0.139336	14.3264	17.4306	21.4166	23.6712	26.2069	23.8933	20.0369	18.5362	18.4907	17.2507	16.7685
4	4	0	0	2002-11-27	0.139336	13.3726	16.2155	20.0006	22.1541	25.6259	23.9529	19.9683	18.4789	18.5334	17.1871	16.7483
4	4	0	0	2002-11-28	0.139336	12.2565	15.0633	18.6231	20.5622	24.9165	23.9721	19.8793	18.4006	18.5724	17.1263	16.7247
4	4	0	0	2002-11-29	0.139336	11.4915	14.0618	17.3562	19.1167	24.2986	24.0187	19.8229	18.3474	18.6072	17.0633	16.7001
4	4	0	0	2002-11-30	0.139336	10.8371	13.1339	16.1599	17.7867	23.7626	24.0214	19.7663	18.2846	18.6361	16.9962	16.6729
4	4	0	0	2002-12-01	0.139336	10.4362	12.3815	15.1797	16.5597	22.7149	23.5784	19.7367	18.239	18.6716	16.9361	16.651
4	4	0	0	2002-12-02	0.139336	10.0984	11.7357	14.2567	15.4136	21.4322	23.0378	19.7131	18.1888	18.7038	16.9616	16.6279
4	4	0	0	2002-12-03	0.139336	9.76719	11.1324	13.4595	14.2967	20.1404	22.4321	19.6907	18.1379	18.7319	16.9031	16.6035
4	4	0	0	2002-12-04	0.139336	9.44399	10.5891	12.684	13.2662	18.9206	21.8633	19.671	18.082	18.7561	16.9225	16.5781
4	4	0	0	2002-12-05	0.139336	9.16688	10.123	11.9725	12.2999	17.8005	21.37	19.5302	18.0235	18.7769	16.8509	16.5512
4	4	0	0	2002-12-06	0.139336	8.76128	9.72	11.3363	11.4631	16.7382	20.4287	19.3988	17.9726	18.7761	16.783	16.5254
4	4	0	0	2002-12-07	0.139336	8.44061	9.39078	10.7989	10.6909	15.7573	19.3077	19.2875	17.7961	18.7461	16.7193	16.5026
4	4	0	0	2002-12-08	0.139336	8.2124	9.11072	10.3207	10.0355	14.818	18.1937	19.191	17.6294	18.3859	16.6593	16.4824
4	4	0	0	2002-12-09	0.139336	8.01962	8.8527	9.89362	9.40564	13.9549	17.1433	19.1107	17.4629	18.0498	16.6016	16.462
4	4	0	0	2002-12-10	0.139336	8.59835	9.00354	9.77581	9.01696	13.2975	16.3075	19.1185	17.3695	17.7835	16.5754	16.4656
4	4	0	0	2002-12-11	0.139336	9.93115	9.46715	9.95146	8.8727	12.8947	15.6439	19.219	17.3565	17.579	16.5842	16.4948
4	4	0	0	2002-12-12	0.139336	11.2051	9.94378	10.1567	8.78828	12.5318	15.0387	19.3274	17.3563	17.3979	16.5948	16.5236
4	4	0	0	2002-12-13	0.139336	12.3225	10.3883	10.3425	8.70898	12.2309	14.4423	19.4286	17.3562	17.233	16.602	16.5476
4	4	0	0	2002-12-14	0.139336	13.3463	10.8039	10.5118	8.6447	11.9318	13.8938	19.5163	17.3562	17.0829	16.6063	16.5555
4	4	0	0	2002-12-15	0.139336	13.5513	11.1957	10.6807	8.60767	11.6618	13.3802	19.5745	17.356	16.9311	16.6103	16.5702
4	4	0	0	2002-12-16	0.139336	12.9132	11.543	10.777	8.57981	11.4187	12.938	19.3111	17.3579	16.7916	16.6146	16.5731
4	4	0	0	2002-12-17	0.139336	12.1708	11.8088	10.8473	8.54817	11.2028	12.5119	18.9744	17.3577	16.6599	16.616	16.5695
4	4	0	0	2002-12-18	0.139336	11.5024	12.0334	10.9209	8.52046	11.0057	12.1498	18.595	17.3593	16.5386	16.6153	16.5587
4	4	0	0	2002-12-19	0.139336	16.2692	14.9287	12.7869	9.83914	11.9076	12.695	18.8378	17.8111	16.7221	16.8383	16.6464
4	4	0	0	2002-12-20	0.139336	22.0777	17.9354	14.9843	11.4179	13.0397	13.4381	19.2418	18.2549	16.9708	17.1018	16.7668
4	4	0	0	2002-12-21	0.139336	27.5868	20.3709	17.0522	12.8674	14.1191	14.1538	19.3033	18.6734	17.2077	17.3506	16.8775
4	4	0	0	2002-12-22	0.139336	32.9063	22.6595	19.0026	14.25	15.1579	14.8604	19.2059	19.0774	17.4398	17.5878	16.9813
4	4	0	0	2002-12-23	0.139336	37.6309	24.684	20.7247	15.4846	16.0791	15.4823	19.0372	19.4355	17.6434	17.7982	17.0671
4	4	0	0	2002-12-24	0.139336	36.5958	26.5574	22.3149	16.629	16.93	16.0639	18.8675	19.7729	17.8344	17.9919	17.1402
4	4	0	0	2002-12-25	0.139336	34.7432	28.531	23.699	17.8117	17.8208	16.6971	18.7711	20.1246	18.038	18.1901	17.2182
4	4	0	0	2002-12-26	0.139336	33.015	30.4225	24.7471	18.931	18.6351	17.309	18.6783	20.462	18.2331	18.3791	17.2914
4	4	0	0	2002-12-27	0.139336	31.1177	32.1333	25.6404	19.9193	19.3617	17.8581	18.5725	20.7668	18.378	18.5484	17.3504
4	4	0	0	2002-12-28	0.139336	29.7256	33.7947	26.5256	20.8628	20.0708	18.3938	18.4701	21.064	18.5178	18.7116	17.4089
4	4	0	0	2002-12-29	0.139336	28.3281	32.5874	27.3088	21.7062	20.7069	18.87	18.3656	21.3258	18.6411	18.8567	17.4537
4	4	0	0	2002-12-30	0.139336	26.4972	30.7411	28.0143	22.2864	21.2868	19.3072	18.2581	21.5454	18.7449	18.9877	17.4875
4	4	0	0	2002-12-31	0.139336	24.5815	28.9199	28.6366	22.5935	21.7991	19.6664	18.1709	21.5037	18.8343	19.1041	17.5112
4	4	0	0	2003-01-01	0.139336	22.8651	27.1121	29.2047	22.8342	22.2465	19.9858	18.0763	21.3931	18.9072	19.2081	17.5295
4	4	0	0	2003-01-02	0.139336	21.3906	25.6789	29.8215	23.1298	22.7063	20.3311	18.0405	21.2628	18.9885	19.3154	17.5518
4	4	0	0	2003-01-03	0.139336	20.2428	24.4065	28.6337	23.4303	23.1515	20.6698	18.0078	21.148	19.0641	19.4184	17.562
4	4	0	0	2003-01-04	0.139336	19.2047	22.9719	27.0563	23.6999	23.4081	20.9801	17.9776	21.0566	19.1285	19.5115	17.5668
4	4	0	0	2003-01-05	0.139336	18.3395	21.5815	25.5535	23.9501	23.4807	21.2628	17.9539	20.727	19.1889	19.5817	17.5691
4	4	0	0	2003-01-06	0.139336	17.531	20.3187	24.08	24.1743	23.5116	21.5008	17.9335	20.2855	19.1506	19.6186	17.5657
4	4	0	0	2003-01-07	0.139336	16.4982	19.0653	22.7798	24.3788	23.5418	21.712	17.9149	19.834	19.1098	19.4012	17.5599
4	4	0	0	2003-01-08	0.139336	15.3785	17.9316	21.5585	23.2076	23.5578	21.8964	17.8954	19.4014	19.0603	19.1953	17.5506
4	4	0	0	2003-01-09	0.139336	14.3342	16.8904	20.2539	21.7639	23.5646	21.936	17.8826	19.0031	19.0112	19.0055	17.5376
4	4	0	0	2003-01-10	0.139336	18.6913	18.6364	20.7793	21.7264	24.6362	22.7231	18.4658	19.0648	19.2647	19.0488	17.702
4	4	0	0	2003-01-11	0.139336	23.9234	20.8481	21.6816	21.9286	25.862	23.6207	19.1326	19.2109	19.5639	19.1374	17.89
4	4	0	0	2003-01-12	0.139336	29.3985	23.0694	22.6711	22.3226	27.1214	24.5582	19.8195	19.3815	19.8763	19.2481	18.0833
4	4	0	0	2003-01-13	0.139336	34.7476	25.1835	23.6979	22.7434	27.2538	25.4629	20.4792	19.5599	20.178	19.3618	18.2677
4	4	0	0	2003-01-14	0.139336	39.7174	27.1517	24.6642	23.0103	27.0941	26.299	21.0928	19.7207	20.4565	19.4568	18.4382
4	4	0	0	2003-01-15	0.139336	38.9815	28.9621	25.5826	23.2203	26.917	27.0694	21.6384	19.885	20.7144	19.545	18.5956
4	4	0	0	2003-01-16	0.139336	37.0743	30.6162	26.4159	23.4159	26.695	27.7701	22.129	20.0224	20.948	19.6213	18.7368
4	4	0	0	2003-01-17	0.139336	34.5378	32.091	27.0553	23.5271	26.5052	28.3987	22.5723	20.1553	21.1585	19.6873	18.8619
4	4	0	0	2003-01-18	0.139336	31.8818	33.4367	27.5784	23.632	26.3096	28.0647	22.9726	20.2615	21.3486	19.7418	18.9737
4	4	0	0	2003-01-19	0.139336	29.3353	34.6495	28.0381	23.7177	26.0121	27.5065	23.3327	20.3539	21.4583	19.7887	19.0182
4	4	0	0	2003-01-20	0.139336	26.8983	33.052	28.4335	23.798	25.693	26.9535	23.6532	20.4348	21.5529	19.828	19.1066
4	4	0	0	2003-01-21	0.139336	24.6884	30.9917	28.8022	23.8723	25.4086	26.4009	23.9346	20.5118	21.6379	19.8639	19.1857
4	4	0	0	2003-01-22	0.139336	22.618	28.7103	29.0959	23.8348	25.0839	25.8978	24.1736	20.5713	21.7091	19.8908	19.2535
4	4	0	0	2003-01-23	0.139336	20.8203	26.4771	29.3914	23.7761	24.8074	25.4346	24.3948	20.6306	21.7796	19.9183	19.3158
4	4	0	0	2003-01-24	0.139336	19.2047	24.3876	29.6583	23.7184	24.5534	24.918	24.5116	20.6889	21.8419	19.9418	19.371
4	4	0	0	2003-01-25	0.139336	17.7347	22.4252	28.1058	23.6456	24.322	24.4058	24.5201	20.7384	21.8961	19.9601	19.4198
4	4	0	0	2003-01-26	0.139336	16.3948	20.6692	26.2911	23.5891	24.1155	23.9473	24.5115	20.7842	21.9463	19.9542	19.4636
4	4	0	0	2003-01-27	0.139336	16.225	19.5445	24.7051	23.7666	24.0511	23.6478	24.6072	20.9021	22.0449	19.9841	19.5342
4	4	0	0	2003-01-28	0.139336	16.2712	18.666	23.2327	23.9994	24.0131	23.425	24.7197	21.029	22.1447	20.0209	19.6058
4	4	0	0	2003-01-29	0.139336	16.4245	17.937	21.895	24.2412	23.9976	23.2395	24.8308	21.1546	22.2296	20.0523	19.6734
4	4	0	0	2003-01-30	0.139336	16.6109	17.2912	20.6527	23.1253	23.9768	23.0774	24.9311	21.2533	22.1476	20.0789	19.7341
4	4	0	0	2003-01-31	0.139336	16.7585	16.6988	19.5238	21.7977	23.9608	22.9298	25.0208	21.339	22.0245	20.0967	19.7878
4	4	0	0	2003-02-01	0.139336	15.9273	16.1971	18.4999	20.3987	23.9367	22.737	25.0989	21.4154	21.8735	20.1095	19.8352
4	4	0	0	2003-02-02	0.139336	14.9366	15.7248	17.5841	19.0468	23.9247	22.5409	24.5719	21.5962	21.8044	20.1717	19.922
4	4	0	0	2003-02-03	0.139336	13.9017	15.284	16.7532	17.7845	23.9112	22.3555	23.9224	21.6578	21.682	20.1737	19.9593
4	4	0	0	2003-02-04	0.139336	12.9464	14.8995	16.0041	16.6141	22.8277	22.1786	23.3036	21.7116	21.4035	20.1748	19.9802
4	4	0	0	2003-02-05	0.139336	12.0951	14.5478	15.3255	15.5545	21.5953	22.0234	22.7089	21.753	21.0576	20.1073	19.9787
4	4	0	0	2003-02-06	0.139336	11.3309	13.75	14.7363	14.5956	20.323	21.8761	22.1772	21.7847	20.7068	20.0398	19.7753
4	4	0	0	2003-02-07	0.139336	13.3173	14.248	15.0835	14.4055	19.6389	22.1972	21.9842	22.0376	20.5255	20.0831	19.6748
4	4	0	0	2003-02-08	0.139336	15.2846	14.7141	15.4454	14.2739	19.0226	22.5137	21.7605	22.2148	20.3654	20.1251	19.5862
4	4	0	0	2003-02-09	0.139336	17.1908	15.1895	15.8245	14.1888	18.4675	21.9285	21.5455	22.3159	20.2116	20.1693	19.5038
4	4	0	0	2003-02-10	0.139336	22.6771	17.5071	17.4187	15.0512	18.7171	21.8159	21.7711	22.7086	20.2714	20.3654	19.5522
4	4	0	0	2003-02-11	0.139336	28.2102	19.8915	18.7313	15.9928	19.0565	21.678	22.0087	23.1083	20.3395	20.5652	19.6132
4	4	0	0	2003-02-12	0.139336	30.9726	22.266	19.9841	16.9438	19.4568	21.5681	22.2783	23.5063	20.4213	20.7642	19.6822
4	4	0	0	2003-02-13	0.139336	33.4474	24.4867	21.1198	17.8339	19.8467	21.467	22.5329	23.8729	20.4951	20.9475	19.738
4	4	0	0	2003-02-14	0.139336	35.678	26.5552	22.1801	18.6758	20.2245	21.3761	22.7786	24.2129	20.5741	21.1183	19.7903
4	4	0	0	2003-02-15	0.139336	34.0457	28.4817	23.1809	19.4634	20.5881	21.312	23.0135	24.5317	20.6444	21.2771	19.8386
4	4	0	0	2003-02-16	0.139336	32.1107	30.2814	24.1258	19.964	20.9542	21.2725	23.2001	24.8262	20.7203	21.4251	19.8835
4	4	0	0	2003-02-17	0.139336	29.9379	30.5759	24.9845	20.36	21.2805	21.244	23.3552	24.6453	20.7815	21.5614	19.9214
4	4	0	0	2003-02-18	0.139336	27.872	30.7831	25.7766	20.6957	21.5794	21.2244	23.4956	24.3565	20.8362	21.639	19.9549
4	4	0	0	2003-02-19	0.139336	25.9524	30.9362	26.5155	21.0115	21.8692	21.2195	23.624	24.0776	20.8886	21.7081	19.9856
4	4	0	0	2003-02-20	0.139336	24.166	29.2262	27.2049	21.3151	22.1418	21.2248	23.7505	23.8036	20.9419	21.7732	20.0151
4	4	0	0	2003-02-21	0.139336	25.9699	29.1611	29.0052	22.4748	22.9032	21.8304	24.2525	23.8548	21.1835	21.9779	20.1579
4	4	0	0	2003-02-22	0.139336	28.579	29.3794	30.0719	23.7709	23.7423	22.5372	24.822	23.9765	21.4585	22.2072	20.3213
4	4	0	0	2003-02-23	0.139336	31.9223	30.0177	31.3233	25.2009	24.6789	23.3435	25.4498	24.1213	21.7662	22.4562	20.5014
4	4	0	0	2003-02-24	0.139336	35.0715	30.6333	32.4765	26.5428	25.5615	24.1099	25.4443	24.2486	22.0549	22.6876	20.6692
4	4	0	0	2003-02-25	0.139336	37.9348	31.1713	32.29	27.775	26.3774	24.8142	25.3074	24.3716	22.32	22.9019	20.8053
4	4	0	0	2003-02-26	0.139336	38.2749	32.2436	32.3602	29.2109	27.3726	25.5055	25.2388	24.5672	22.6292	23.1478	20.9676
4	4	0	0	2003-02-27	0.139336	37.6525	33.2363	32.2989	29.8549	28.2851	26.1008	25.1447	24.7536	22.9113	23.3728	21.116
4	4	0	0	2003-02-28	0.139336	36.26	34.2121	32.26	30.4444	29.1504	26.6493	25.0646	24.9349	23.1785	23.5734	21.2507
4	4	0	0	2003-03-01	0.139336	34.9597	35.1364	32.237	30.9849	29.9639	27.168	24.9963	25.1133	23.4168	23.6416	21.3758
4	4	0	0	2003-03-02	0.139336	33.9098	36.0424	32.2456	30.5831	30.7398	27.6726	24.9563	25.2919	23.6428	23.6749	21.491
4	4	0	0	2003-03-03	0.139336	32.451	35.4838	32.4744	30.2711	31.5965	28.2595	25.0061	25.4889	23.8892	23.7092	21.6186
4	4	0	0	2003-03-04	0.139336	33.6424	35.7692	33.5342	30.5227	32.3513	29.2186	25.3407	25.8705	24.2564	23.8421	21.8165
4	4	0	0	2003-03-05	0.139336	34.9616	35.7312	34.6233	30.8235	33.0866	30.1596	25.6906	26.2484	24.612	23.9855	22.0064
4	4	0	0	2003-03-06	0.139336	36.9928	36.0953	35.9161	31.3133	33.9246	31.1756	26.1183	26.6678	24.986	24.0303	22.2104
4	4	0	0	2003-03-07	0.139336	39.3398	36.7452	37.3037	31.9074	34.0729	32.2141	26.5846	27.1096	25.3597	24.0303	22.3639
4	4	0	0	2003-03-08	0.139336	41.1347	36.9116	37.5269	32.5257	34.1802	33.2263	27.0623	27.5418	25.7175	24.0208	22.5126
4	4	0	0	2003-03-09	0.139336	40.8863	37.3835	37.6347	33.2588	34.3327	33.8136	27.5696	27.9954	26.082	24.0314	22.6644
4	4	0	0	2003-03-10	0.139336	40.4604	37.8338	37.4708	33.9695	34.4871	34.3533	28.0515	28.4247	26.3817	24.0465	22.8066
5	5	0	0	2002-03-12	0.16384	7.55844	7.86991	8.48118	9.36262	10.1732	10.0796	11.0036	13.0418	19.694	24.3848	21.8632
5	5	0	0	2002-03-13	0.16384	7.44677	7.73256	8.26272	9.06367	10.1223	9.97229	10.7935	12.7721	19.3094	24.1001	21.8435
5	5	0	0	2002-03-14	0.16384	7.35224	7.61436	8.06981	8.79165	9.82059	9.87644	10.5984	12.5308	18.9367	23.8327	21.8264
5	5	0	0	2002-03-15	0.16384	7.24667	7.50742	7.89434	8.54787	9.4922	9.79263	10.4223	12.1898	18.5758	23.5815	21.8091
5	5	0	0	2002-03-16	0.16384	7.52077	7.58814	7.85864	8.41894	9.25676	9.78072	10.3067	11.918	18.2596	23.365	21.8063
5	5	0	0	2002-03-17	0.16384	8.13095	7.8447	7.95694	8.39361	9.11629	9.83288	10.2439	11.6907	17.9767	23.159	21.8166
5	5	0	0	2002-03-18	0.16384	8.70962	8.07819	8.05825	8.37445	8.99286	9.88687	10.1918	11.4856	17.7267	22.9483	21.8271
5	5	0	0	2002-03-19	0.16384	9.23681	8.29453	8.15518	8.36163	8.88067	9.72329	10.1141	11.304	17.4989	22.7201	21.8303
5	5	0	0	2002-03-20	0.16384	9.72397	8.48532	8.24627	8.35174	8.78309	9.53083	10.0347	11.1446	17.2921	22.5038	21.831
5	5	0	0	2002-03-21	0.16384	9.77417	8.6475	8.31683	8.33753	8.68997	9.343	9.95704	10.9991	17.0799	22.2201	21.8299
5	5	0	0	2002-03-22	0.16384	9.45133	8.79115	8.38025	8.33053	8.60517	9.17213	9.88737	10.867	16.8773	21.9424	21.8287
5	5	0	0	2002-03-23	0.16384	9.13785	8.92374	8.43142	8.32815	8.52712	9.01703	9.82619	10.7483	16.689	21.6607	21.8281
5	5	0	0	2002-03-24	0.16384	8.84373	9.04026	8.47759	8.32731	8.458	8.87451	9.77044	10.6417	16.5195	21.3892	21.828
5	5	0	0	2002-03-25	0.16384	8.66563	9.19479	8.54542	8.35111	8.41452	8.76351	9.72797	10.557	16.3455	21.153	21.832
5	5	0	0	2002-03-26	0.16384	8.5274	9.15081	8.60745	8.36947	8.3755	8.66288	9.66688	10.4837	16.1877	20.9375	21.836
5	5	0	0	2002-03-27	0.16384	8.41384	8.93259	8.66539	8.38865	8.3472	8.57328	9.60815	10.419	15.9418	20.7425	21.8397
5	5	0	0	2002-03-28	0.16384	8.31426	8.72606	8.72058	8.40213	8.32538	8.49165	9.55505	10.2753	15.6828	20.5133	21.8429
5	5	0	0	2002-03-29	0.16384	8.22891	8.53636	8.76982	8.41543	8.30763	8.41982	9.50757	10.1412	15.3864	20.2576	21.8457
5	5	0	0	2002-03-30	0.16384	8.0633	8.36446	8.81762	8.42489	8.29354	8.35598	9.46763	10.0211	15.0767	20.0019	21.8487
5	5	0	0	2002-03-31	0.16384	7.92487	8.22614	8.74216	8.43681	8.28055	8.3004	9.43453	9.91553	14.6792	19.729	21.8523
5	5	0	0	2002-04-01	0.16384	7.79325	8.10355	8.5528	8.44735	8.26957	8.25487	9.40618	9.82115	14.2942	19.4596	21.8559
5	5	0	0	2002-04-02	0.16384	7.66985	7.99205	8.37398	8.4579	8.25567	8.21613	9.38258	9.7373	13.9373	19.2126	21.8592
5	5	0	0	2002-04-03	0.16384	7.56123	7.89509	8.21129	8.46767	8.24458	8.18324	9.21929	9.63837	13.6152	18.9796	21.8625
5	5	0	0	2002-04-04	0.16384	7.45261	7.75796	8.06052	8.47636	8.23043	8.15339	9.04073	9.54116	13.3211	18.7567	21.8658
5	5	0	0	2002-04-05	0.16384	7.3464	7.63562	7.93289	8.39321	8.21872	8.12485	8.87295	9.451	12.9613	18.5166	21.8692
5	5	0	0	2002-04-06	0.16384	7.24729	7.52026	7.81806	8.22642	8.20734	8.09919	8.7208	9.37005	12.6349	18.2153	21.8724
5	5	0	0	2002-04-07	0.16384	7.15621	7.41305	7.71343	8.06954	8.19756	8.07243	8.58249	9.29801	12.3342	17.9175	21.8757
5	5	0	0	2002-04-08	0.16384	7.07174	7.31648	7.62063	7.92639	8.18849	8.04909	8.45656	9.23298	12.0371	17.6175	21.8269
5	5	0	0	2002-04-09	0.16384	6.99425	7.22343	7.50338	7.79396	8.17995	8.02441	8.34347	9.17181	11.7878	17.3201	21.579
5	5	0	0	2002-04-10	0.16384	6.91699	7.13168	7.39608	7.67891	8.09795	8.00177	8.24063	9.09918	11.5604	17.0482	21.3339
5	5	0	0	2002-04-11	0.16384	7.3397	7.29349	7.46007	7.69852	8.04908	8.06274	8.20221	8.85678	11.3821	16.7862	21.1204
5	5	0	0	2002-04-12	0.16384	10.4048	8.7805	8.41028	8.38627	8.53659	8.56543	8.46452	9.05449	11.3699	16.6234	20.9931
5	5	0	0	2002-04-13	0.16384	14.4458	10.7588	9.69293	9.32693	9.23029	9.23138	8.84419	9.33954	11.431	16.5104	20.9124
5	5	0	0	2002-04-14	0.16384	19.8201	13.4072	11.4223	10.5826	10.1992	10.12	9.37809	9.74193	11.4998	16.4618	20.8892
5	5	0	0	2002-04-15	0.16384	26.3305	16.6238	13.5313	12.1297	11.4092	11.1367	10.044	10.2444	11.6576	16.4788	20.9194
5	5	0	0	2002-04-16	0.16384	32.7671	20.0534	15.7847	13.7868	12.7122	12.1688	10.7648	10.7864	11.85	16.5247	20.9609
5	5	0	0	2002-04-17	0.16384	36.4371	23.4209	17.9994	15.4169	13.9964	13.1867	11.4772	11.3224	12.0526	16.5917	20.9959
5	5	0	0	2002-04-18	0.16384	38.8648	26.6553	20.1275	16.9859	15.2345	14.1694	12.1647	11.732	12.2591	16.6665	21.0099
5	5	0	0	2002-04-19	0.16384	39.5935	29.7068	22.136	18.4651	16.3847	15.0982	12.8142	12.1002	12.4625	16.7436	21.0227
5	5	0	0	2002-04-20	0.16384	38.8616	32.5961	24.0364	19.8639	17.4761	15.9846	13.4287	12.4495	12.6609	16.8061	20.973
5	5	0	0	2002-04-21	0.16384	37.5922	35.1797	25.8997	21.2366	18.5479	16.8589	14.0327	12.8011	12.8643	16.8728	20.9257
5	5	0	0	2002-04-22	0.16384	36.122	36.2795	27.6546	22.53	19.5579	17.684	14.5998	13.1361	13.0602	16.9377	20.8653
5	5	0	0	2002-04-23	0.16384	34.5914	36.728	29.3006	23.7433	20.507	18.4606	15.133	13.4532	13.248	17.0047	20.8035
5	5	0	0	2002-04-24	0.16384	33.1479	36.3707	30.8538	24.8889	21.4016	19.1786	15.6342	13.7567	13.4309	17.0537	20.7582
5	5	0	0	2002-04-25	0.16384	31.7824	35.3218	32.3249	25.9729	22.2476	19.8605	16.1095	14.0473	13.6093	17.1059	20.7221
5	5	0	0	2002-04-26	0.162066	30.3181	33.9552	33.5591	27.0043	23.0528	20.5096	16.5615	14.3271	13.7825	17.0838	20.6959
5	5	0	0	2002-04-27	0.162066	28.9322	32.5269	33.8304	27.974	23.8104	21.1204	16.9871	14.5916	13.8903	17.0422	20.6347
5	5	0	0	2002-04-28	0.162066	27.6904	31.1406	33.7154	28.8981	24.5328	21.7042	17.3928	14.8476	13.9955	16.9659	20.5469
5	5	0	0	2002-04-29	0.162066	26.5147	29.8313	33.0853	29.7689	25.214	22.2538	17.7751	15.0905	14.0987	16.871	20.4523
5	5	0	0	2002-04-30	0.162066	25.4001	28.5913	32.0149	30.5937	25.8583	22.773	18.0961	15.3223	14.2014	16.7027	20.3378
5	5	0	0	2002-05-01	0.162066	24.2653	27.2917	30.7252	31.2356	26.4564	23.2549	18.3543	15.5405	14.2991	16.5344	20.2187
5	5	0	0	2002-05-02	0.162066	23.273	26.1026	29.4423	31.191	27.0338	23.7209	18.6052	15.7541	14.3985	16.3832	20.1142
5	5	0	0	2002-05-03	0.162066	22.3214	25.0059	28.2009	30.8669	27.5827	24.1642	18.8465	15.9593	14.4803	16.2525	20.0165
5	5	0	0	2002-05-04	0.162066	21.444	23.9791	27.0356	30.1749	28.104	24.5857	19.0773	16.1552	14.556	16.1373	19.9225
5	5	0	0	2002-05-05	0.162066	20.6277	23.0138	25.9367	29.1678	28.6005	24.9866	19.302	16.3413	14.6295	15.9676	19.8106
5	5	0	0	2002-05-06	0.162066	19.9657	22.1156	24.8495	28.0352	28.9816	25.3747	19.5225	16.5226	14.7049	15.8199	19.6472
5	5	0	0	2002-05-07	0.162066	19.274	21.2737	23.8263	26.9003	28.8077	25.7405	19.7315	16.6921	14.7788	15.6858	19.4821
5	5	0	0	2002-05-08	0.162066	18.5836	20.4524	22.8651	25.7967	28.4103	26.0828	19.9288	16.8516	14.8496	15.5485	19.3106
5	5	0	0	2002-05-09	0.162066	17.9607	19.7023	21.9731	24.7668	27.7323	26.4134	20.1101	17.0046	14.919	15.4442	19.1388
5	5	0	0	2002-05-10	0.162066	17.3805	19.0042	21.1362	23.7975	26.8107	26.7305	20.2857	17.1518	14.9763	15.3529	18.9847
5	5	0	0	2002-05-11	0.162066	16.8009	18.3833	20.3438	22.8374	25.7885	26.9515	20.4544	17.2928	15.0313	15.2745	18.8193
5	5	0	0	2002-05-12	0.162066	16.2609	17.7674	19.6027	21.9351	24.7725	26.7165	20.6144	17.4266	15.0847	15.2065	18.642
5	5	0	0	2002-05-13	0.165533	15.784	17.1838	18.8963	21.0948	23.7941	26.3058	20.7682	17.5543	15.1379	15.1497	18.4695
5	5	0	0	2002-05-14	0.165533	15.2978	16.6292	18.2343	20.3043	22.873	25.6596	20.9139	17.6755	15.1908	15.0398	18.3014
5	5	0	0	2002-05-15	0.165533	14.8195	16.0999	17.6092	19.5569	22.002	24.8119	21.0518	17.76	15.2432	14.9462	18.1455
5	5	0	0	2002-05-16	0.165533	14.3615	15.5811	17.0426	18.8484	21.1421	23.8838	21.1842	17.812	15.2951	14.8585	17.9965
5	5	0	0	2002-05-17	0.165533	13.9444	15.1027	16.4932	18.1881	20.337	22.9677	21.3116	17.8628	15.3471	14.7814	17.8669
5	5	0	0	2002-05-18	0.165533	13.5352	14.6595	15.9676	17.5561	19.5828	22.0842	21.432	17.9125	15.3257	14.7154	17.7501
5	5	0	0	2002-05-19	0.165533	13.1483	14.2231	15.4691	16.9627	18.8731	21.2523	21.5468	17.9609	15.2938	14.6599	17.6453
5	5	0	0	2002-05-20	0.165533	12.7871	13.8032	14.9957	16.4037	18.203	20.4662	21.6563	18.0111	15.2646	14.6122	17.5381
5	5	0	0	2002-05-21	0.165379	12.4392	13.4003	14.5339	15.8918	17.5666	19.6917	21.7611	18.061	15.2409	14.5712	17.4366
5	5	0	0	2002-05-22	0.165379	12.1048	13.0247	14.1034	15.3959	16.9715	18.9649	21.8615	18.1101	15.222	14.5364	17.3432
5	5	0	0	2002-05-23	0.165379	11.8103	12.6728	13.7099	14.9284	16.4069	18.2874	21.9585	18.1597	15.2075	14.5079	17.2613
5	5	0	0	2002-05-24	0.157779	11.5257	12.3369	13.3239	14.4832	15.8752	17.6485	22.0503	18.1992	15.1969	14.4853	17.1727
5	5	0	0	2002-05-25	0.157779	11.2512	12.0192	12.9526	14.0596	15.3732	17.0444	22.1379	18.2381	15.1893	14.4681	17.0936
5	5	0	0	2002-05-26	0.157779	10.987	11.713	12.596	13.647	14.9109	16.4698	22.1664	18.2754	15.1843	14.4544	16.961
5	5	0	0	2002-05-27	0.157779	10.7296	11.4173	12.2597	13.26	14.4627	15.9312	21.8976	18.3114	15.181	14.4005	16.82
5	5	0	0	2002-05-28	0.157779	13.219	12.5147	12.8548	13.5871	14.5864	15.8756	21.8222	18.5755	15.3332	14.4655	16.7478
5	5	0	0	2002-05-29	0.157779	15.6324	13.579	13.4354	13.9011	14.713	15.8348	21.585	18.8299	15.4815	14.5327	16.6637
5	5	0	0	2002-05-30	0.157779	17.942	14.5966	13.9935	14.2	14.8361	15.8013	21.2058	19.0728	15.6249	14.6013	16.5224
5	5	0	0	2002-05-31	0.157779	20.1516	15.5693	14.5259	14.4848	14.948	15.7843	20.7646	19.3053	15.7647	14.6704	16.3844
5	5	0	0	2002-06-01	0.157779	22.1982	16.4639	15.0109	14.7443	15.0476	15.752	20.3155	19.5221	15.8963	14.7369	16.257
5	5	0	0	2002-06-02	0.157779	21.5479	17.3834	15.5257	15.0281	15.1793	15.7467	19.8981	19.7411	16.0314	14.7969	16.1513
5	5	0	0	2002-06-03	0.157779	21.0264	18.3294	16.0615	15.3332	15.3261	15.7652	19.522	19.9611	16.1681	14.8583	16.2037
5	5	0	0	2002-06-04	0.157779	20.602	19.272	16.5984	15.6456	15.4804	15.797	19.1769	20.1775	16.3028	14.9214	16.0744
5	5	0	0	2002-06-05	0.157779	20.2228	20.1872	17.1205	15.9501	15.6325	15.8272	18.8347	20.3866	16.4337	14.9855	16.1297
5	5	0	0	2002-06-06	0.157779	19.9498	21.074	17.6259	16.2456	15.7854	15.8646	18.5186	20.5882	16.5592	15.0503	16.03
5	5	0	0	2002-06-07	0.157779	19.6047	20.5763	18.1238	16.5455	15.9434	15.9169	18.2329	20.7855	16.6829	15.1164	15.9306
5	5	0	0	2002-06-08	0.157779	19.2154	20.1209	18.6248	16.85	16.1096	15.9743	17.9739	20.9795	16.804	15.1828	15.8587
5	5	0	0	2002-06-09	0.157779	18.8249	19.7134	19.1229	17.155	16.2814	16.0378	17.7372	21.1698	16.9233	15.2417	15.7983
5	5	0	0	2002-06-10	0.157779	18.4493	19.336	19.6079	17.4527	16.45	16.1019	17.5159	21.3123	17.0387	15.2989	15.7484
5	5	0	0	2002-06-11	0.156046	18.1094	19.0296	20.0858	17.7467	16.6184	16.1727	17.316	21.2303	17.1516	15.3567	15.7081
5	5	0	0	2002-06-12	0.156046	17.7724	18.6885	19.6417	18.036	16.7909	16.2482	17.1309	21.0627	17.2618	15.4155	15.6778
5	5	0	0	2002-06-13	0.156046	17.4008	18.3081	19.2142	18.3188	16.9601	16.3249	16.9613	20.7779	17.3682	15.4743	15.6052
5	5	0	0	2002-06-14	0.155646	16.9984	17.9117	18.8084	18.5918	17.1237	16.4009	16.8037	20.3921	17.4499	15.5326	15.5455
5	5	0	0	2002-06-15	0.155646	16.6015	17.5254	18.4245	18.8563	17.2824	16.4752	16.6644	19.9653	17.5093	15.5902	15.4903
5	5	0	0	2002-06-16	0.155646	16.1847	17.147	18.0813	19.1105	17.4343	16.5461	16.5284	19.5425	17.5668	15.6468	15.4427
5	5	0	0	2002-06-17	0.155646	15.7526	16.7625	17.7099	18.6694	17.5793	16.6178	16.4011	19.1367	17.6238	15.6487	15.4043
5	5	0	0	2002-06-18	0.155646	15.3257	16.3632	17.314	18.2421	17.7202	16.6877	16.2815	18.7556	17.6793	15.6423	15.3739
5	5	0	0	2002-06-19	0.155646	14.9282	15.9633	16.9172	17.8384	17.8591	16.7578	16.1704	18.3977	17.7362	15.6379	15.3498
5	5	0	0	2002-06-20	0.155646	14.5419	15.5717	16.5309	17.4539	17.9934	16.8257	16.0617	18.0443	17.7921	15.6371	15.3305
5	5	0	0	2002-06-21	0.155646	14.5568	15.3707	16.2836	17.2002	18.1997	16.9548	16.0043	17.7455	17.8679	15.6552	15.3285
5	5	0	0	2002-06-22	0.155646	14.5947	15.1736	16.0399	16.9311	17.8545	17.0819	15.9579	17.4703	17.9433	15.6761	15.3311
5	5	0	0	2002-06-23	0.155492	14.6593	14.9925	15.7953	16.6503	17.5255	17.21	15.9146	17.2149	18.0124	15.7002	15.3387
5	5	0	0	2002-06-24	0.155492	14.7194	14.8238	15.5487	16.3678	17.2146	17.3358	15.8748	16.9757	18.0802	15.7259	15.35
5	5	0	0	2002-06-25	0.155492	14.7809	14.6614	15.3081	16.0934	16.9193	17.458	15.8373	16.7496	18.1458	15.7527	15.3635
5	5	0	0	2002-06-26	0.155492	14.501	14.5289	15.0808	15.838	16.6603	17.5833	15.8088	16.5429	18.2116	15.7816	15.3455
5	5	0	0	2002-06-27	0.155492	14.2392	14.417	14.8622	15.5897	16.3927	17.2519	15.7862	16.3494	18.2772	15.8129	15.3312
5	5	0	0	2002-06-28	0.151225	13.989	14.3242	14.658	15.3437	16.118	16.9361	15.7692	16.1711	18.3416	15.8452	15.3218
5	5	0	0	2002-06-29	0.151225	13.7545	14.237	14.4674	15.1002	15.8451	16.6379	15.7564	16.0053	18.4041	15.8782	15.3171
5	5	0	0	2002-06-30	0.151225	13.54	14.1604	14.2876	14.8661	15.5827	16.3561	15.746	15.8558	18.4651	15.9125	15.3159
5	5	0	0	2002-07-01	0.148292	13.408	13.9545	14.1553	14.6627	15.352	16.1183	15.7492	15.7208	18.5304	15.9518	15.3216
5	5	0	0	2002-07-02	0.148292	13.2614	13.7503	14.0318	14.462	15.1241	15.8708	15.7558	15.5944	18.5939	15.9912	15.3201
5	5	0	0	2002-07-03	0.148292	13.1138	13.5514	13.9207	14.2719	14.8977	15.6173	15.7654	15.4769	18.6561	16.0304	15.3185
5	5	0	0	2002-07-04	0.147807	12.9693	13.3619	13.8144	14.0929	14.674	15.3658	15.7767	15.3671	18.7165	16.0686	15.3187
5	5	0	0	2002-07-05	0.147807	12.8455	13.1927	13.7221	13.927	14.462	15.1265	15.7912	15.2625	18.7761	16.1069	15.3221
5	5	0	0	2002-07-06	0.147807	12.6186	13.0133	13.5092	13.7711	14.2538	14.8964	15.8062	15.1662	18.8339	16.1435	15.3279
5	5	0	0	2002-07-07	0.147499	12.3954	12.8284	13.2987	13.6227	14.0487	14.6693	15.8208	15.0787	18.8896	16.1795	15.3354
5	5	0	0	2002-07-08	0.147499	12.1813	12.6475	13.0947	13.4858	13.8538	14.445	15.8382	14.9953	18.9442	16.2143	15.3437
5	5	0	0	2002-07-09	0.147499	11.9662	12.4678	12.8967	13.3524	13.6676	14.2227	15.8561	14.9159	18.997	16.2482	15.3463
5	5	0	0	2002-07-10	0.147499	11.7217	12.2836	12.7024	13.222	13.486	14.0052	15.8728	14.8392	19.0196	16.2804	15.3486
5	5	0	0	2002-07-11	0.147499	11.4553	12.0369	12.494	12.9957	13.308	13.7874	15.8869	14.7657	18.8922	16.3105	15.3513
5	5	0	0	2002-07-12	0.147499	11.1987	11.797	12.2852	12.7737	13.1379	13.5737	15.5963	14.6966	18.7093	16.3398	15.3555
5	5	0	0	2002-07-13	0.147246	10.9463	11.5638	12.0805	12.5576	12.9779	13.3692	15.3176	14.6327	18.4513	16.3684	15.3617
5	5	0	0	2002-07-14	0.147246	10.7088	11.3375	11.8815	12.3497	12.8237	13.1744	15.0524	14.5733	18.1291	16.381	15.3694
5	5	0	0	2002-07-15	0.147246	10.5029	11.1123	11.69	12.1525	12.6782	12.9888	14.8007	14.5177	17.7826	16.3792	15.3783
5	5	0	0	2002-07-16	0.147121	10.3459	10.9006	11.4733	11.957	12.4658	12.8143	14.57	14.4658	17.4427	16.3787	15.3887
5	5	0	0	2002-07-17	0.142854	10.1923	10.6955	11.2621	11.762	12.2574	12.647	14.3346	14.418	17.1164	16.3796	15.3568
5	5	0	0	2002-07-18	0.142854	10.1554	10.5509	11.0943	11.5992	12.0772	12.5075	14.1097	14.3833	16.8158	16.3864	15.3237
5	5	0	0	2002-07-19	0.133387	10.5147	10.6117	11.0632	11.5398	11.9827	12.4388	13.9316	14.384	16.5543	16.4119	15.3394
5	5	0	0	2002-07-20	0.133387	10.9952	10.749	11.0733	11.5163	11.9211	12.3977	13.7754	14.3973	16.305	16.4435	15.3305
5	5	0	0	2002-07-21	0.133387	11.5271	10.9365	11.1094	11.4867	11.871	12.3093	13.6341	14.4177	16.0764	16.4782	15.3273
5	5	0	0	2002-07-22	0.133387	14.8651	12.5287	12.0854	11.7917	12.3826	12.692	13.808	14.6726	16.0204	16.6305	15.4206
5	5	0	0	2002-07-23	0.133387	18.0308	14.0931	13.0442	12.077	12.8855	13.0694	13.9781	14.9254	15.976	16.7766	15.5153
5	5	0	0	2002-07-24	0.132703	20.6974	15.6061	13.9736	12.3431	13.3713	13.4352	14.1397	15.1711	15.9384	16.919	15.609
5	5	0	0	2002-07-25	0.132051	23.1247	17.0599	14.8742	12.5984	13.838	13.7883	14.2949	15.4088	15.9054	17.0564	15.7011
5	5	0	0	2002-07-26	0.132051	25.3519	18.4395	15.7416	12.8372	14.2598	14.1178	14.4388	15.6362	15.8774	17.1882	15.7901
5	5	0	0	2002-07-27	0.128451	24.7289	19.797	16.5954	13.4134	14.6761	14.4403	14.5809	15.6317	15.8559	17.318	15.8797
5	5	0	0	2002-07-28	0.128451	24.0998	21.0653	17.4287	13.9753	15.0827	14.7546	14.7224	15.631	15.8418	17.4448	15.9683
5	5	0	0	2002-07-29	0.115251	23.4553	22.0764	18.2225	14.5112	15.4685	15.052	14.8571	15.6306	15.8304	17.5661	16.0542
5	5	0	0	2002-07-30	0.115251	22.863	22.9938	18.9943	15.0386	15.8415	15.3421	14.9906	15.6347	15.8275	17.6844	16.1398
5	5	0	0	2002-07-31	0.115251	22.2457	23.7988	19.7082	15.5349	16.1852	15.5908	15.1123	15.6402	15.8203	17.7955	16.2209
5	5	0	0	2002-08-01	0.115251	21.6548	23.1918	20.4163	16.0275	16.528	15.8392	15.2367	15.6407	15.8189	17.9052	16.3021
5	5	0	0	2002-08-02	0.111785	21.1115	22.6057	21.0807	16.5166	16.8688	16.0875	15.3652	15.6381	15.8234	18.0139	16.3831
5	5	0	0	2002-08-03	0.0223179	20.6474	22.0514	21.6001	16.9959	17.2047	16.3316	15.4926	15.6344	15.8315	18.1203	16.4625
5	5	0	0	2002-08-04	0.0223179	20.1127	21.4878	22.0333	17.4411	17.5197	16.5534	15.6096	15.6256	15.8357	18.2204	16.5375
5	5	0	0	2002-08-05	0.0218462	19.6969	20.9713	22.4315	17.8726	17.8335	16.7705	15.6834	15.6191	15.8438	18.318	16.6102
5	5	0	0	2002-08-06	0.0129128	19.747	20.7009	22.0435	18.4161	18.2376	17.0645	15.8092	15.6525	15.8835	18.4334	16.6978
5	5	0	0	2002-08-07	0.0129128	19.7263	20.4189	21.6458	18.9093	18.6248	17.345	15.9283	15.6806	15.9214	18.5444	16.7817
5	5	0	0	2002-08-08	0.0129128	19.6431	20.1453	21.2486	19.278	18.9916	17.6111	16.0397	15.7025	15.9572	18.6505	16.8621
5	5	0	0	2002-08-09	0.0129128	19.6178	19.8652	20.8645	19.5967	19.3426	17.8694	16.147	15.7229	15.9922	18.732	16.9394
5	5	0	0	2002-08-10	0.0129128	19.5496	19.6233	20.4974	19.8782	19.6742	18.1195	16.2443	15.7391	16.0265	18.699	17.0136
5	5	0	0	2002-08-11	0.00962051	18.9395	19.3432	20.1138	19.4347	19.9871	18.3546	16.3315	15.7498	16.0588	18.6206	17.0841
5	5	0	0	2002-08-12	0.00962051	18.3533	19.0398	19.7304	18.9899	20.2644	18.5795	16.4132	15.76	16.0912	18.4833	17.152
5	5	0	0	2002-08-13	0.00962051	17.7685	18.7058	19.353	18.5457	20.4423	18.7877	16.4856	15.7667	16.121	18.2938	16.9868
5	5	0	0	2002-08-14	0.00962051	17.1823	18.4001	18.9709	18.1111	20.5801	18.9826	16.5517	15.7713	16.1489	18.0826	17.0243
5	5	0	0	2002-08-15	0.00962051	16.6103	18.0799	18.6189	17.6928	20.6909	19.1636	16.6002	15.7746	16.1747	17.8729	17.0601
5	5	0	0	2002-08-16	0.00962051	16.0737	17.5066	18.2534	17.2709	20.2288	19.3348	16.6439	15.7765	16.1999	17.671	17.0951
5	5	0	0	2002-08-17	0.00915897	15.4707	16.912	17.8501	16.8326	19.7523	19.4654	16.6751	15.7721	16.2202	17.4782	17.1266
5	5	0	0	2002-08-18	0.00915897	14.8567	16.3126	17.4228	16.3961	19.2742	19.5114	16.6953	15.7608	16.236	17.2936	17.1562
5	5	0	0	2002-08-19	0.00915897	14.2506	15.7164	17.0169	15.958	18.8053	19.5252	16.7079	15.7471	16.2495	17.1101	17.1843
5	5	0	0	2002-08-20	0.00915897	13.6948	15.1525	16.6182	15.5551	18.3595	19.5249	16.7197	15.7027	16.263	16.9385	17.212
5	5	0	0	2002-08-21	0.00915897	13.1333	14.6035	16.0489	15.1406	17.9097	19.0462	16.7259	15.6547	16.2734	16.7769	17.2381
5	5	0	0	2002-08-22	0.00915897	12.6454	14.058	15.4898	14.7161	17.4614	18.5679	16.7266	15.6043	16.2825	16.6239	17.2593
5	5	0	0	2002-08-23	0.00915897	12.2244	13.5405	14.9498	14.2904	17.028	18.0992	16.724	15.5528	16.29	16.4786	17.2794
5	5	0	0	2002-08-24	0.00915897	11.8268	13.0387	14.4199	13.8866	16.598	17.6421	16.7195	15.5009	16.2962	16.3396	17.298
5	5	0	0	2002-08-25	0.00915897	11.4172	12.556	13.9074	13.4852	16.1938	17.2024	16.7155	15.4458	16.3012	16.2087	17.3154
5	5	0	0	2002-08-26	0.00915897	11.0428	12.0881	13.4166	12.9645	15.7873	16.7652	16.7086	15.3884	16.1525	16.0832	17.3319
5	5	0	0	2002-08-27	0.00915897	10.6944	11.6699	12.9368	12.4582	15.378	16.3336	16.6986	15.3297	16.0081	15.9648	17.347
5	5	0	0	2002-08-28	0.00915897	10.3516	11.288	12.4776	11.9675	14.9689	15.9153	16.6844	15.2693	15.8684	15.8516	17.3603
5	5	0	0	2002-08-29	0.00915897	10.031	10.9289	12.0361	11.4899	14.5817	15.5035	16.6671	15.2085	15.7339	15.7465	17.3726
5	5	0	0	2002-08-30	0.00915897	9.72524	10.5712	11.6124	11.0291	14.1994	15.1157	16.6465	15.1389	15.6082	15.6442	17.3839
5	5	0	0	2002-08-31	0.00915897	9.44786	10.2453	11.208	10.5916	13.7275	14.7307	16.6259	15.0706	15.4803	15.5469	17.3948
5	5	0	0	2002-09-01	0.00915897	9.19195	9.94319	10.844	10.1678	13.2712	14.347	16.5916	15.0029	15.3506	15.4543	17.405
5	5	0	0	2002-09-02	0.00915897	8.98267	9.66716	10.5196	9.77104	12.8367	13.9712	16.5141	14.937	15.2229	15.3664	17.4149
5	5	0	0	2002-09-03	0.00390769	8.80474	9.41785	10.2208	9.39546	12.4191	13.6189	16.4237	14.8717	15.0996	15.2815	17.4245
5	5	0	0	2002-09-04	0.00390769	8.6432	9.18422	9.92857	9.0373	12.0182	13.2734	16.3261	14.8076	14.9801	15.2012	17.4335
5	5	0	0	2002-09-05	0.00390769	8.48297	8.96541	9.65789	8.69395	11.6361	12.8534	15.9168	14.7446	14.8624	15.126	17.4418
5	5	0	0	2002-09-06	0.0036	8.32631	8.75913	9.40423	8.38173	11.2658	12.447	15.5133	14.6817	14.7457	15.0528	17.4494
5	5	0	0	2002-09-07	0.0036	8.87888	8.93078	9.40439	8.27657	11.0589	12.1771	15.201	14.6797	14.6703	15.0122	17.4803
5	5	0	0	2002-09-08	0.0036	10.0058	9.4053	9.61381	8.33427	10.9838	12.0169	14.9661	14.7288	14.6305	14.9983	17.5134
5	5	0	0	2002-09-09	0.0036	16.4939	12.5685	11.6208	9.73708	11.9949	12.7641	15.3419	15.2274	14.8904	15.2109	17.6365
5	5	0	0	2002-09-10	0.0036	22.5468	15.5149	13.4925	11.0473	12.9308	13.4546	15.6743	15.6902	15.1276	15.4078	17.7118
5	5	0	0	2002-09-11	0.0036	28.0871	18.2067	15.2018	12.2421	13.7891	14.0693	15.9563	16.1101	15.3394	15.5857	17.7249
5	5	0	0	2002-09-12	0.0036	32.5704	20.7246	16.8107	13.3631	14.6016	14.6441	16.2138	16.5016	15.5354	15.7518	17.6883
5	5	0	0	2002-09-13	0.0036	36.0534	23.0296	18.288	14.3909	15.3444	15.1621	16.4317	16.858	15.7111	15.9022	17.6229
5	5	0	0	2002-09-14	0.0036	33.7693	25.1316	19.6355	15.3251	16.0098	15.6238	16.6223	17.1794	15.8673	16.037	17.5475
5	5	0	0	2002-09-15	0.0036	31.5506	27.0487	20.8601	16.1743	16.6142	16.0341	16.7738	17.4701	16.0053	16.1584	17.468
5	5	0	0	2002-09-16	0.0036	29.773	28.9301	22.0622	17.0118	17.2146	16.453	16.9187	17.7449	16.142	16.2784	17.3976
5	5	0	0	2002-09-17	0.00413333	28.0395	30.305	23.1629	17.7851	17.7646	16.8412	17.0351	17.962	16.2638	16.3874	17.3275
5	5	0	0	2002-09-18	0.00413333	26.4714	31.2624	24.1769	18.501	18.2733	17.1989	17.1382	18.1477	16.3739	16.4869	17.2523
5	5	0	0	2002-09-19	0.00413333	25.0715	29.4204	25.1115	19.1616	18.7406	17.5201	17.2194	18.3081	16.4514	16.5773	17.1792
5	5	0	0	2002-09-20	0.00413333	23.8758	27.7132	25.9911	19.7812	19.1808	17.8245	17.2326	18.221	16.5209	16.6611	17.1108
5	5	0	0	2002-09-21	0.00413333	22.5232	26.1481	26.7944	20.3446	19.5803	18.0993	17.2295	18.1192	16.5789	16.7367	17.0435
5	5	0	0	2002-09-22	0.00413333	21.297	24.6683	27.3023	20.8636	19.9537	18.3533	17.2189	18.0119	16.6292	16.8059	16.978
5	5	0	0	2002-09-23	0.00413333	20.1049	23.2881	27.5432	21.3261	20.2881	18.5785	17.1923	17.896	16.6697	16.8668	16.9118
5	5	0	0	2002-09-24	0.00413333	19.0022	22.0368	25.9476	21.7514	20.596	18.7842	17.1586	17.779	16.7015	16.9219	16.8482
5	5	0	0	2002-09-25	0.0176	17.8763	20.8761	24.4343	22.1296	20.8665	18.9634	17.1145	17.6499	16.723	16.8552	16.7837
5	5	0	0	2002-09-26	0.0176	16.8499	19.6866	23.0487	22.4755	21.1119	19.1253	17.0625	17.5151	16.7379	16.7874	16.7213
5	5	0	0	2002-09-27	0.0205333	15.8945	18.5957	21.7437	22.6175	21.3361	19.2772	17.0106	17.3819	16.7481	16.7206	16.6611
5	5	0	0	2002-09-28	0.0376	16.7917	18.4483	21.1227	23.0225	21.8855	19.7053	17.1489	17.3901	16.8503	16.7268	16.6627
5	5	0	0	2002-09-29	0.0446667	17.7134	18.3578	20.5957	22.0563	22.41	20.1156	17.2812	17.4013	16.9407	16.7351	16.6629
5	5	0	0	2002-09-30	0.0453179	18.6014	18.2389	20.1178	21.1432	22.8902	20.489	17.3953	17.3955	17.0196	16.7324	16.6597
5	5	0	0	2002-10-01	0.0453179	19.6169	18.2334	19.6633	20.3579	23.37	20.8628	17.5232	17.3905	17.0991	16.7287	16.6604
5	5	0	0	2002-10-02	0.0453179	20.59	18.2422	19.2605	19.6224	23.6783	21.2117	17.6477	17.3771	17.1715	16.7201	16.6599
5	5	0	0	2002-10-03	0.0457795	19.9264	18.359	18.941	18.9908	23.8696	21.5589	17.7796	17.3745	17.2437	16.7144	16.6614
5	5	0	0	2002-10-04	0.0457795	19.2637	18.4885	18.6598	18.4299	22.964	21.8856	17.9	17.3651	17.3098	16.7065	16.6625
5	5	0	0	2002-10-05	0.0499308	18.8051	18.7032	18.4276	17.9569	22.1419	22.2093	18.0255	17.317	17.3757	16.6991	16.6671
5	5	0	0	2002-10-06	0.0511923	18.2845	18.9507	18.2504	17.4858	21.4095	22.5224	18.1497	17.2704	17.4382	16.6899	16.6617
5	5	0	0	2002-10-07	0.0511923	17.741	19.1655	18.0752	17.0478	20.7124	22.6887	18.2606	17.2186	17.4923	16.6749	16.6624
5	5	0	0	2002-10-08	0.0516769	20.094	20.0102	18.9374	17.3964	20.6777	23.2403	18.6982	17.4142	17.7089	16.7829	16.7617
5	5	0	0	2002-10-09	0.0516769	22.3805	20.8221	19.7858	17.7571	20.6862	22.8667	19.1181	17.6011	17.9168	16.8844	16.857
5	5	0	0	2002-10-10	0.0516769	24.6091	21.7071	20.6718	18.1402	20.7535	22.553	19.5329	17.7895	18.1208	16.984	16.9518
5	5	0	0	2002-10-11	0.0516769	26.5948	22.4396	21.4987	18.5037	20.7738	22.2737	19.9164	17.9571	18.3075	17.073	17.0382
5	5	0	0	2002-10-12	0.0526942	28.3579	23.0494	22.2297	18.813	20.7761	21.9867	20.2613	18.101	18.4728	17.1482	17.1137
5	5	0	0	2002-10-13	0.0526942	26.8968	23.4954	22.3058	19.0944	20.7628	21.7142	20.5721	18.2238	18.6196	17.2119	17.1795
5	5	0	0	2002-10-14	0.0526942	25.3647	23.8726	22.3363	19.3478	20.7449	21.466	20.8558	18.3306	18.7512	17.267	17.2377
5	5	0	0	2002-10-15	0.0530942	23.6715	24.1403	22.3619	19.589	20.7127	21.2399	21.1133	18.4226	18.8696	17.3139	17.2896
5	5	0	0	2002-10-16	0.053566	22.0783	24.3365	22.3192	19.8108	20.6849	20.9913	21.3482	18.5078	18.9699	17.3543	17.3359
5	5	0	0	2002-10-17	0.0537199	20.6495	24.5036	22.2495	20.0018	20.6466	20.7549	21.5576	18.5838	19.0359	17.3866	17.3758
5	5	0	0	2002-10-18	0.0537199	19.3496	23.1232	22.1134	19.7339	20.6117	20.5272	21.7438	18.6487	19.0837	17.4122	17.4099
5	5	0	0	2002-10-19	0.0537199	18.1372	21.751	21.9608	19.4537	20.5719	20.3103	21.9107	18.7008	19.1184	17.4162	17.4388
5	5	0	0	2002-10-20	0.0554939	16.9861	20.3288	21.7556	19.1852	20.5346	20.0916	22.0581	18.7437	18.9874	17.4136	17.4622
5	5	0	0	2002-10-21	0.0554939	16.7691	19.4237	21.8141	19.0989	20.6687	20.0322	22.2863	18.8514	18.8998	17.4422	17.5107
5	5	0	0	2002-10-22	0.0607452	16.6661	18.6578	21.8912	19.0208	20.8009	19.9832	22.4229	18.9539	18.8119	17.4677	17.5563
5	5	0	0	2002-10-23	0.0607452	16.5863	17.9679	20.9442	18.8988	20.5706	19.9408	22.4749	19.0453	18.7205	17.4874	17.5965
5	5	0	0	2002-10-24	0.0607452	16.5354	17.3363	20.0125	18.7716	20.3364	19.8992	21.9153	19.1273	18.6286	17.5009	17.6323
5	5	0	0	2002-10-25	0.0607452	16.4406	16.7134	19.0327	18.594	20.1025	19.8523	21.3796	19.1935	18.527	17.5053	17.5696
5	5	0	0	2002-10-26	0.0607452	15.5126	16.1409	18.12	18.4059	19.8478	19.8094	20.8891	19.253	18.4227	17.5057	17.5067
5	5	0	0	2002-10-27	0.0607452	14.5861	15.6261	17.3006	18.2321	19.6001	19.7651	20.4246	19.3068	18.3192	17.5024	17.4444
5	5	0	0	2002-10-28	0.0607452	13.721	15.1536	16.5523	17.3056	19.3295	19.429	19.9936	19.3528	18.2126	17.495	17.3821
5	5	0	0	2002-10-29	0.0610528	12.8997	14.7176	15.8574	16.4015	19.0635	19.0969	19.5965	19.3919	18.1094	17.4797	17.3224
5	5	0	0	2002-10-30	0.0610528	12.2951	14.3678	15.2406	15.5155	18.8005	18.8012	19.2401	19.4308	18.007	17.465	17.2611
5	5	0	0	2002-10-31	0.0610528	12.0665	13.7896	14.7828	14.7738	18.6043	18.551	18.9218	19.4925	17.9203	17.4621	17.208
5	5	0	0	2002-11-01	0.0610528	14.6023	14.5942	15.2848	14.7932	18.9724	18.7671	18.9316	19.7751	17.9833	17.5704	17.2444
5	5	0	0	2002-11-02	0.15052	17.7979	15.7595	16.035	15.0309	18.8703	19.0742	19.0298	20.1022	18.084	17.7014	17.3013
5	5	0	0	2002-11-03	0.15052	21.4699	17.1848	16.9683	15.4278	18.8814	19.4646	19.1963	20.4607	18.2079	17.8485	17.373
5	5	0	0	2002-11-04	0.15292	24.852	18.5735	17.8625	15.8106	18.849	19.8091	19.3486	20.7948	18.2906	17.9841	17.436
5	5	0	0	2002-11-05	0.15292	27.4323	19.7494	18.3371	16.1123	18.7718	20.0756	19.4672	21.0847	18.3483	18.0975	17.482
5	5	0	0	2002-11-06	0.15292	30.128	22.3651	19.7721	17.1628	19.3264	20.8316	19.9128	21.5458	18.5658	18.3272	17.6212
5	5	0	0	2002-11-07	0.153173	33.4997	25.6489	21.6729	18.5684	20.1909	21.3086	20.5182	22.0601	18.8552	18.6088	17.803
5	5	0	0	2002-11-08	0.153173	36.4736	28.9717	23.6144	20.0118	21.1032	21.8134	21.1376	22.1257	19.1481	18.891	17.9852
5	5	0	0	2002-11-09	0.153173	39.3155	32.0838	25.4876	21.393	21.9779	22.2601	21.7307	22.1922	19.4226	19.1556	18.1541
5	5	0	0	2002-11-10	0.154107	42.1047	34.7685	27.2012	22.4462	22.7771	22.6606	22.2733	22.2528	19.6679	19.3958	18.3054
5	5	0	0	2002-11-11	0.167307	41.8285	35.9786	28.8532	23.4536	23.5624	23.0769	22.7945	22.3174	19.9026	19.6238	18.4489
5	5	0	0	2002-11-12	0.167307	39.953	36.7262	30.4167	24.41	24.3115	23.4845	23.0916	22.385	20.1203	19.8359	18.5814
5	5	0	0	2002-11-13	0.167307	37.9004	37.1878	31.9485	25.3535	25.0561	23.903	23.3808	22.4701	20.331	20.0391	18.7091
5	5	0	0	2002-11-14	0.167307	35.8533	37.5849	33.3406	26.2464	25.7515	24.2906	23.6477	22.5509	20.5215	20.2248	18.8242
5	5	0	0	2002-11-15	0.167307	34.1057	38.1052	34.5475	27.0945	26.2444	24.6652	23.8832	22.6138	20.7032	20.3937	18.9314
5	5	0	0	2002-11-16	0.167307	32.1049	36.9671	34.6874	27.8333	26.6501	24.9862	24.0739	22.6562	20.8608	20.5234	19.0214
5	5	0	0	2002-11-17	0.167307	30.2534	35.1029	34.5686	28.5431	27.0449	25.3018	24.239	22.7001	21.0093	20.6383	19.1051
5	5	0	0	2002-11-18	0.167307	28.1247	33.0134	34.1668	29.1597	27.374	25.5676	24.3653	22.7246	21.1326	20.7307	19.1614
5	5	0	0	2002-11-19	0.167307	26.2813	31.0677	33.817	29.7429	27.7196	25.8398	24.4784	22.7513	21.2519	20.7005	19.2138
5	5	0	0	2002-11-20	0.167307	24.4531	29.2794	33.5545	30.1912	28.0325	25.9458	24.5686	22.7747	21.3591	20.6613	19.2579
5	5	0	0	2002-11-21	0.167307	22.9312	27.5181	32.2885	29.9156	28.3192	26.0303	24.6506	22.7924	21.4556	20.6165	19.2952
5	5	0	0	2002-11-22	0.167307	21.3635	25.8084	30.5231	29.4345	28.5734	26.098	24.3801	22.8051	21.5391	20.5649	19.3245
5	5	0	0	2002-11-23	0.167307	20.0996	24.1121	28.7088	28.8172	28.814	26.1616	24.1119	22.816	21.615	20.5118	19.348
5	5	0	0	2002-11-24	0.167307	18.7782	22.5298	26.9713	28.2246	29.0163	26.2294	23.8305	22.8265	21.6817	20.4526	19.3651
5	5	0	0	2002-11-25	0.167307	17.4922	20.9727	25.3504	27.7061	29.1176	26.2758	23.5571	22.8282	21.7368	20.386	19.3746
5	5	0	0	2002-11-26	0.167307	16.3076	19.6194	23.7812	26.4604	28.6602	26.3172	23.3117	22.8268	21.7865	20.3187	19.3803
5	5	0	0	2002-11-27	0.167307	15.2813	18.3224	22.2994	24.8798	28.0701	26.3581	23.0895	22.6792	21.8308	20.249	19.3825
5	5	0	0	2002-11-28	0.167307	14.0736	17.0866	20.8539	23.2172	27.3347	26.3572	22.8573	22.5127	21.8712	20.1823	19.379
5	5	0	0	2002-11-29	0.167307	13.246	16.0121	19.5231	21.7072	26.6951	26.3879	22.6721	22.3802	21.9074	20.1132	19.3733
5	5	0	0	2002-11-30	0.167307	12.535	15.0136	18.2481	20.3137	26.1382	26.3538	22.4968	22.238	21.9372	20.0396	19.3641
5	5	0	0	2002-12-01	0.167307	12.0471	14.1774	17.1833	19.0149	25.044	25.8913	22.3558	22.1149	21.9714	19.9713	19.3583
5	5	0	0	2002-12-02	0.167307	11.6304	13.4559	16.1797	17.7993	23.6962	25.3302	22.2318	21.9878	22.0024	19.9961	19.3508
5	5	0	0	2002-12-03	0.167307	11.2244	12.781	15.3084	16.6137	22.3376	24.6936	22.1185	21.8647	22.0293	19.9299	19.3413
5	5	0	0	2002-12-04	0.167307	10.8312	12.1705	14.461	15.5174	21.0509	24.0951	22.0175	21.7377	22.0525	19.9487	19.33
5	5	0	0	2002-12-05	0.167307	10.492	11.6454	13.6823	14.4762	19.8684	23.5744	21.8287	21.6107	22.0721	19.8618	19.3166
5	5	0	0	2002-12-06	0.167307	10.0662	11.1885	12.9828	13.5711	18.7442	22.5916	21.6518	21.4973	22.052	19.7793	19.3038
5	5	0	0	2002-12-07	0.167307	9.76897	10.8316	12.4028	12.7441	17.7123	21.419	21.5037	21.1494	22.004	19.7032	19.2945
5	5	0	0	2002-12-08	0.167307	9.56742	10.5278	11.8857	12.0404	16.7235	20.2532	21.3736	20.819	21.6591	19.6314	19.2871
5	5	0	0	2002-12-09	0.167307	9.39928	10.2472	11.4227	11.3628	15.8127	19.153	21.2645	20.4922	21.3367	19.5622	19.2788
5	5	0	0	2002-12-10	0.167307	10.7128	10.7343	11.5104	11.1071	15.2426	18.3864	21.3247	20.3091	21.1216	19.5545	19.3177
5	5	0	0	2002-12-11	0.167307	12.4184	11.3742	11.7744	11.0089	14.8596	17.7338	21.4403	20.191	20.9471	19.5674	19.3696
5	5	0	0	2002-12-12	0.167307	14.0151	12.024	12.0687	10.9731	14.5174	17.1401	21.5656	20.0979	20.7942	19.5822	19.4204
5	5	0	0	2002-12-13	0.167307	15.4254	12.6283	12.3363	10.9378	14.2364	16.5511	21.6836	20.0127	20.6547	19.593	19.4652
5	5	0	0	2002-12-14	0.167307	16.7204	13.1917	12.5808	10.9143	13.9533	16.008	21.7855	19.9349	20.5275	19.6001	19.4762
5	5	0	0	2002-12-15	0.167307	16.4644	13.7206	12.8202	10.9161	13.6976	15.4902	21.8426	19.8633	20.3969	19.6069	19.5078
5	5	0	0	2002-12-16	0.167307	15.706	14.1941	12.994	10.9245	13.4674	15.0447	21.5922	19.801	20.2766	19.6137	19.5224
5	5	0	0	2002-12-17	0.167307	14.8108	14.5448	13.1288	10.9214	13.2596	14.6103	21.2631	19.7417	20.1611	19.6165	19.5274
5	5	0	0	2002-12-18	0.167307	14.0025	14.8459	13.2623	10.92	13.0698	14.2414	20.8832	19.6901	20.0544	19.6168	19.5276
5	5	0	0	2002-12-19	0.167307	18.7971	17.8907	15.2361	12.3021	14.0099	14.8046	21.1421	20.1078	20.26	19.8471	19.6161
5	5	0	0	2002-12-20	0.167307	24.6802	20.7042	17.5497	13.9524	15.1879	15.572	21.5662	20.5445	20.5313	20.1193	19.7382
5	5	0	0	2002-12-21	0.167307	30.2766	23.1233	19.7308	15.4819	16.3139	16.3129	21.6381	20.9572	20.7901	20.3769	19.8505
5	5	0	0	2002-12-22	0.167307	35.7161	25.3953	21.7778	16.9428	17.3993	17.0463	21.5386	21.3578	21.043	20.6229	19.9559
5	5	0	0	2002-12-23	0.167307	40.5498	27.4078	23.5896	18.2512	18.3649	17.6936	21.3653	21.7133	21.2661	20.8416	20.0429
5	5	0	0	2002-12-24	0.167307	39.4893	29.2756	25.2664	19.4668	19.2587	18.3006	21.1908	22.0506	21.4754	21.0434	20.1169
5	5	0	0	2002-12-25	0.167307	37.4189	31.1815	26.4517	20.6841	20.1647	18.9371	21.0748	22.3921	21.6887	21.2439	20.191
5	5	0	0	2002-12-26	0.167307	35.4901	33.0153	27.4214	21.8379	21.0025	19.5539	20.963	22.7212	21.8934	21.4354	20.2605
5	5	0	0	2002-12-27	0.167307	33.3944	34.6872	28.2376	22.8492	21.752	20.1092	20.8392	23.0193	21.9801	21.6074	20.3158
5	5	0	0	2002-12-28	0.167307	31.8239	36.3185	29.0557	23.8153	22.4848	20.652	20.7193	23.3122	22.0647	21.7734	20.371
5	5	0	0	2002-12-29	0.167307	30.2577	35.0058	29.7789	24.6815	23.144	21.1359	20.5983	23.5695	22.1376	21.9215	20.4125
5	5	0	0	2002-12-30	0.167307	28.4018	33.0423	30.4308	25.1064	23.7467	21.5816	20.4704	23.7753	22.1914	22.0553	20.4428
5	5	0	0	2002-12-31	0.167307	26.4563	31.1051	31.0048	25.3473	24.2805	21.9555	20.3647	23.731	22.234	22.1744	20.4629
5	5	0	0	2003-01-01	0.167307	24.7079	29.1831	31.5366	25.5224	24.7399	22.2887	20.2524	23.6171	22.2603	22.281	20.4777
5	5	0	0	2003-01-02	0.167307	23.7667	27.9272	32.3105	25.9007	25.3246	22.7424	20.2644	23.5257	22.3295	22.4146	20.5155
5	5	0	0	2003-01-03	0.167307	23.1311	26.8263	31.2235	26.2841	25.8904	23.1858	20.2776	23.4481	22.3926	22.5428	20.5341
5	5	0	0	2003-01-04	0.167307	22.5558	25.6108	29.7227	26.6293	26.1153	23.5922	20.2889	23.3909	22.4434	22.6591	20.5459
5	5	0	0	2003-01-05	0.167307	22.0111	24.3656	28.2497	26.9236	26.1991	23.9463	20.2918	23.0766	22.4859	22.7326	20.5506
5	5	0	0	2003-01-06	0.167307	21.4356	23.2036	26.7765	27.1786	26.224	24.2332	20.2897	22.6337	22.3495	22.7682	20.5471
5	5	0	0	2003-01-07	0.167307	20.046	22.0383	25.476	27.4116	26.2486	24.4888	20.2878	22.1787	22.2145	22.5735	20.5408
5	5	0	0	2003-01-08	0.167307	18.5627	20.9789	24.2477	26.2255	26.2588	24.7131	20.283	21.7406	22.0714	22.3878	20.5303
5	5	0	0	2003-01-09	0.167307	17.1803	20	22.9765	24.7543	26.2585	24.6701	20.2836	21.3359	21.935	22.2157	20.5156
5	5	0	0	2003-01-10	0.167307	21.4552	21.865	23.5713	24.7182	27.349	25.4524	20.8931	21.4008	22.117	22.2804	20.6823
5	5	0	0	2003-01-11	0.167307	26.7022	24.2008	24.5457	24.9251	28.6023	26.3477	21.588	21.5515	22.3534	22.3896	20.8732
5	5	0	0	2003-01-12	0.167307	32.2208	26.2653	25.6083	25.3294	29.8924	27.2881	22.3041	21.7272	22.6101	22.52	21.07
5	5	0	0	2003-01-13	0.167307	37.6378	28.2321	26.7077	25.7624	30.027	28.1993	22.9931	21.9113	22.862	22.6524	21.2579
5	5	0	0	2003-01-14	0.167307	42.7022	30.0731	27.7432	26.0751	29.8628	29.043	23.6354	22.0742	23.0954	22.7654	21.4321
5	5	0	0	2003-01-15	0.167307	41.9279	31.8233	28.7285	26.3276	29.6791	29.8227	24.2131	22.2413	23.3138	22.8701	21.5935
5	5	0	0	2003-01-16	0.167307	39.9446	33.4549	29.6244	26.5624	29.4478	30.5365	24.7339	22.381	23.5122	22.9619	21.7385
5	5	0	0	2003-01-17	0.167307	37.3384	34.9121	30.1326	26.7083	29.2505	31.1775	25.2058	22.5171	23.6915	23.0422	21.8669
5	5	0	0	2003-01-18	0.167307	34.5885	36.2454	30.5271	26.8452	29.0468	30.8313	25.6329	22.6256	23.8546	23.1098	21.9819
5	5	0	0	2003-01-19	0.167307	31.9402	37.4528	30.8715	26.9598	28.7672	30.2531	26.0186	22.7202	23.953	23.1688	22.0358
5	5	0	0	2003-01-20	0.167307	29.411	35.8008	31.1952	27.0663	28.4634	29.6784	26.3626	22.8033	24.0365	23.219	22.1269
5	5	0	0	2003-01-21	0.167307	27.1174	33.6638	31.5183	27.1648	28.1924	29.1034	26.6615	22.8825	24.1119	23.265	22.2087
5	5	0	0	2003-01-22	0.167307	24.9553	31.2803	31.769	27.0055	27.8767	28.5786	26.9156	22.9437	24.174	23.3012	22.2788
5	5	0	0	2003-01-23	0.167307	23.0664	28.9607	32.0283	26.8291	27.6085	28.094	27.1515	23.0049	24.2373	23.337	22.3433
5	5	0	0	2003-01-24	0.167307	21.3732	26.7893	32.2703	26.6641	27.3615	27.5789	27.2031	23.0656	24.2932	23.3682	22.4006
5	5	0	0	2003-01-25	0.167307	19.8156	24.7451	30.6484	26.5174	27.1352	27.066	27.1844	23.1176	24.3417	23.3935	22.4512
5	5	0	0	2003-01-26	0.167307	18.4074	22.8941	28.7525	26.4077	26.9323	26.6055	27.1496	23.165	24.3869	23.3434	22.4968
5	5	0	0	2003-01-27	0.167307	17.6348	21.427	26.907	26.4027	26.6504	26.2137	27.1611	23.2405	24.4516	23.3089	22.5512
5	5	0	0	2003-01-28	0.167307	17.3019	20.3162	25.2498	26.5139	26.4427	25.9348	27.2161	23.3429	24.5301	23.2939	22.6139
5	5	0	0	2003-01-29	0.167307	17.1041	19.3706	23.7365	26.6451	26.2711	25.6959	27.2742	23.4463	24.5878	23.2745	22.6731
5	5	0	0	2003-01-30	0.167307	16.9735	18.5264	22.3306	25.397	26.1276	25.4856	27.3253	23.5281	24.4881	23.2538	22.7264
5	5	0	0	2003-01-31	0.167307	16.836	17.7536	21.0507	23.9411	26.0124	25.2936	27.3746	23.5988	24.3481	23.2256	22.7732
5	5	0	0	2003-02-01	0.167307	16.2818	17.0901	19.8878	22.4179	25.8975	24.9662	27.4143	23.6619	24.178	23.1957	22.8146
5	5	0	0	2003-02-02	0.167307	15.3704	16.4681	18.8435	20.9471	25.8042	24.6413	26.8354	23.8971	24.1353	23.2497	22.9226
5	5	0	0	2003-02-03	0.167307	14.4163	15.8921	17.8951	19.5736	25.7183	24.3393	26.1338	23.9493	23.9966	23.2123	22.9552
5	5	0	0	2003-02-04	0.167307	13.5331	15.3852	17.0378	18.2984	24.5432	24.0725	25.4649	23.9929	23.6981	23.1774	22.9607
5	5	0	0	2003-02-05	0.167307	12.7438	14.9218	16.2595	17.1412	23.2207	23.8449	24.8221	24.0225	23.3269	23.0183	22.9437
5	5	0	0	2003-02-06	0.167307	12.0329	14.2892	15.5803	16.0912	21.8599	23.6307	24.2458	24.0433	22.9522	22.8635	22.7451
5	5	0	0	2003-02-07	0.167307	14.3685	15.0014	15.9441	15.8919	21.1504	23.9423	24.044	24.3112	22.764	22.834	22.6588
5	5	0	0	2003-02-08	0.167307	16.686	15.683	16.3326	15.76	20.5151	24.2569	23.8301	24.447	22.5991	22.8104	22.584
5	5	0	0	2003-02-09	0.167307	18.9212	16.3591	16.7398	15.6759	19.942	23.6502	23.624	24.5348	22.4401	22.7952	22.5145
5	5	0	0	2003-02-10	0.167307	24.8385	18.9231	18.4033	16.5715	20.1996	23.5343	23.8714	24.9245	22.5019	22.9435	22.5786
5	5	0	0	2003-02-11	0.167307	30.7969	21.5468	19.9677	17.5516	20.5514	23.3934	24.1317	25.3242	22.5721	23.1008	22.6548
5	5	0	0	2003-02-12	0.167307	33.6714	24.1519	21.4006	18.5431	20.9668	23.2812	24.4234	25.7238	22.6574	23.2617	22.7383
5	5	0	0	2003-02-13	0.167307	36.2265	26.5881	22.7067	19.4732	21.3723	23.1777	24.6995	26.0939	22.7315	23.4109	22.8079
5	5	0	0	2003-02-14	0.167307	38.5331	28.8591	23.9259	20.3553	21.7663	23.0845	24.9658	26.4371	22.8118	23.5514	22.873
5	5	0	0	2003-02-15	0.167307	36.8505	30.9764	25.0748	21.1823	22.1463	23.0187	25.2206	26.7612	22.8831	23.6838	22.9334
5	5	0	0	2003-02-16	0.167307	34.8484	32.9546	26.1566	21.8551	22.53	22.9782	25.363	27.0614	22.9603	23.8081	22.9895
5	5	0	0	2003-02-17	0.167307	32.5962	33.2658	27.1426	22.3667	22.8727	22.9491	25.4751	26.8737	23.0229	23.9231	23.0377
5	5	0	0	2003-02-18	0.167307	30.4499	33.4702	28.0512	22.8097	23.1875	22.9292	25.5766	26.5747	23.0793	23.9919	23.0809
5	5	0	0	2003-02-19	0.167307	28.4516	33.6243	28.8991	23.2248	23.4936	22.9245	25.6813	26.285	23.1332	24.0535	23.1203
5	5	0	0	2003-02-20	0.167307	26.5868	31.8506	29.6891	23.62	23.7822	22.9304	25.7931	26.0004	23.1879	24.1114	23.1582
5	5	0	0	2003-02-21	0.167307	28.5062	31.8092	31.6477	24.9112	24.7043	23.57	26.3031	26.0578	23.442	24.3179	23.3151
5	5	0	0	2003-02-22	0.167307	30.8833	31.8717	32.6475	26.2449	25.589	24.2518	26.844	26.1565	23.7101	24.5359	23.4801
5	5	0	0	2003-02-23	0.167307	34.2853	32.4995	33.9177	27.7772	26.6238	25.0812	27.4772	26.3135	24.027	24.7851	23.6709
5	5	0	0	2003-02-24	0.167307	37.4979	33.1067	35.0914	29.216	27.5984	25.8716	27.4639	26.4523	24.3251	25.0191	23.8493
5	5	0	0	2003-02-25	0.167307	40.5071	33.6789	34.912	30.5608	28.5164	26.6137	27.3269	26.5931	24.604	25.2385	23.9576
5	5	0	0	2003-02-26	0.167307	40.8006	34.7854	34.9823	32.1031	29.6081	27.431	27.2563	26.8058	24.9268	25.4914	24.0934
5	5	0	0	2003-02-27	0.167307	40.4793	35.8132	34.9168	32.7726	30.6108	28.1147	27.1597	27.0083	25.223	25.7212	24.2182
5	5	0	0	2003-02-28	0.167307	39.0994	36.8243	34.8753	33.3804	31.5605	28.7471	27.0769	27.205	25.5028	25.9225	24.3291
5	5	0	0	2003-03-01	0.167307	37.8092	37.7855	34.8501	33.938	32.4537	29.3442	27.0063	27.3984	25.7563	25.997	24.432
5	5	0	0	2003-03-02	0.167307	36.688	38.7293	34.8578	33.5231	33.3052	29.9223	26.9651	27.5914	25.9961	26.0366	24.5251
5	5	0	0	2003-03-03	0.167307	35.2379	38.1512	35.1121	33.2133	34.2491	30.5904	27.0228	27.7618	26.2609	26.0761	24.6347
5	5	0	0	2003-03-04	0.167307	36.464	38.6036	36.206	33.4707	35.0299	31.6303	27.368	28.1193	26.6471	26.216	24.8156
5	5	0	0	2003-03-05	0.167307	37.8229	38.5932	37.3331	33.7795	35.7879	32.6482	27.7305	28.4773	27.0211	26.3664	24.9892
5	5	0	0	2003-03-06	0.167307	39.9137	38.9937	38.6708	34.2832	36.6522	33.741	28.1733	28.8903	27.4145	26.4158	25.1799
5	5	0	0	2003-03-07	0.167307	42.3367	39.6442	40.1077	34.8947	36.8049	34.8544	28.6561	29.3332	27.8054	26.4158	25.2753
5	5	0	0	2003-03-08	0.167307	44.1258	39.8136	40.3185	35.5326	36.9147	35.9391	29.1528	29.7684	28.1808	26.4059	25.3683
5	5	0	0	2003-03-09	0.167307	43.8756	40.3015	40.5368	36.2906	37.0707	36.5481	29.6802	30.2287	28.5624	26.417	25.4666
5	5	0	0	2003-03-10	0.167307	43.4384	40.763	40.3845	37.0269	37.2305	37.1072	30.1823	30.6655	28.8393	26.4331	25.5595
6	6	0	0	2002-03-12	0.242667	7.53941	7.83045	8.42019	9.27382	10.0556	9.96264	10.7748	12.726	19.6491	24.5448	21.9884
6	6	0	0	2002-03-13	0.242667	7.4256	7.69821	8.20884	8.98423	10.0069	9.85936	10.5833	12.4444	19.2553	24.2511	21.968
6	6	0	0	2002-03-14	0.242667	7.32901	7.58445	8.02222	8.7207	9.71781	9.76708	10.4082	12.1924	18.8737	23.9753	21.9503
6	6	0	0	2002-03-15	0.242667	7.22537	7.48157	7.85246	8.48453	9.39952	9.68641	10.2502	11.8729	18.5041	23.7161	21.9324
6	6	0	0	2002-03-16	0.242667	7.55196	7.59154	7.83885	8.37517	9.18371	9.6857	10.1563	11.6246	18.1826	23.4944	21.9307
6	6	0	0	2002-03-17	0.242667	8.24554	7.89247	7.9688	8.37651	9.06815	9.75392	10.1172	11.4222	17.8966	23.2902	21.9433
6	6	0	0	2002-03-18	0.242667	8.90227	8.16394	8.09956	8.3822	8.96784	9.82281	10.0865	11.2399	17.644	23.0857	21.9559
6	6	0	0	2002-03-19	0.242667	9.50117	8.41508	8.22336	8.39194	8.8768	9.6817	10.0228	11.0789	17.4137	22.8613	21.9616
6	6	0	0	2002-03-20	0.242667	10.0548	8.64009	8.33932	8.40305	8.79859	9.50874	9.95766	10.9379	17.2047	22.6488	21.9658
6	6	0	0	2002-03-21	0.242667	10.113	8.83249	8.43202	8.40738	8.72274	9.33859	9.89286	10.8089	16.9935	22.3594	21.9679
6	6	0	0	2002-03-22	0.242667	9.76158	9.00355	8.5155	8.417	8.65354	9.18373	9.8348	10.6919	16.7918	22.0777	21.9696
6	6	0	0	2002-03-23	0.242667	9.4203	9.16129	8.58271	8.42974	8.58982	9.04324	9.78414	10.5867	16.6041	21.7937	21.9717
6	6	0	0	2002-03-24	0.242667	9.10009	9.30063	8.64342	8.44254	8.53359	8.91402	9.73791	10.4924	16.4352	21.5198	21.9739
6	6	0	0	2002-03-25	0.242667	8.80554	9.43019	8.69524	8.45587	8.48355	8.79974	9.694	10.4109	16.2621	21.2777	21.977
6	6	0	0	2002-03-26	0.242667	8.56297	9.33801	8.74264	8.46476	8.43851	8.69611	9.63111	10.3402	16.1051	21.0566	21.9802
6	6	0	0	2002-03-27	0.242667	8.35384	9.05772	8.78699	8.47509	8.40437	8.60358	9.57076	10.2779	15.862	20.8566	21.9831
6	6	0	0	2002-03-28	0.242667	8.16608	8.79319	8.82955	8.47856	8.37701	8.51919	9.5161	10.1449	15.6099	20.6146	21.9855
6	6	0	0	2002-03-29	0.242667	8.00054	8.55031	8.86726	8.48269	8.35413	8.44475	9.46713	10.0229	15.32	20.3415	21.9876
6	6	0	0	2002-03-30	0.242667	7.85204	8.32879	8.90413	8.48444	8.33511	8.3783	9.42565	9.91365	15.0178	20.0685	21.99
6	6	0	0	2002-03-31	0.242667	7.72794	8.14547	8.80132	8.48896	8.3174	8.32008	9.39091	9.81758	14.6076	19.7857	21.9929
6	6	0	0	2002-04-01	0.242667	7.60992	7.98188	8.57513	8.49272	8.30206	8.27196	9.36098	9.73166	14.2105	19.5066	21.9958
6	6	0	0	2002-04-02	0.242667	7.49928	7.83267	8.36189	8.49698	8.2827	8.23072	9.33583	9.65533	13.8424	19.2506	21.9986
6	6	0	0	2002-04-03	0.242667	7.40187	7.70119	8.16748	8.50091	8.26653	8.19542	9.17696	9.55897	13.5101	19.0092	22.0013
6	6	0	0	2002-04-04	0.242667	7.30447	7.57825	7.98736	8.50423	8.24845	8.16333	9.00159	9.46508	13.2066	18.7784	22.004
6	6	0	0	2002-04-05	0.242667	7.20917	7.46857	7.83337	8.40327	8.23301	8.13269	8.83685	9.37799	12.8274	18.5247	22.0069
6	6	0	0	2002-04-06	0.242667	7.12028	7.3651	7.69471	8.21141	8.21823	8.10509	8.68738	9.29977	12.4834	18.2146	22.0097
6	6	0	0	2002-04-07	0.242667	7.03859	7.26892	7.56797	8.03106	8.2053	8.07535	8.55149	9.23011	12.1664	17.9106	22.0124
6	6	0	0	2002-04-08	0.242667	6.96279	7.18233	7.45505	7.86632	8.19328	8.04926	8.42769	9.1672	11.8555	17.6078	21.965
6	6	0	0	2002-04-09	0.242667	6.89325	7.09885	7.34991	7.71381	8.18202	8.02258	8.31647	9.10798	11.595	17.3014	21.719
6	6	0	0	2002-04-10	0.242667	6.82387	7.01656	7.25367	7.58102	8.08743	7.99816	8.2153	9.03674	11.3573	17.0213	21.4669
6	6	0	0	2002-04-11	0.242667	7.18934	7.1548	7.30651	7.56835	8.00699	8.04674	8.17123	8.79267	11.1663	16.7485	21.2452
6	6	0	0	2002-04-12	0.242667	10.1993	8.61893	8.24571	8.2258	8.4647	8.53763	8.42803	8.98647	11.1421	16.5759	21.1084
6	6	0	0	2002-04-13	0.242667	14.1782	10.5705	9.51427	9.13583	9.12868	9.19077	8.80126	9.26689	11.1919	16.453	21.0183
6	6	0	0	2002-04-14	0.242667	19.5468	13.22	11.2482	10.3991	10.0804	10.0762	9.33492	9.66925	11.274	16.3971	20.9882
6	6	0	0	2002-04-15	0.242667	26.083	16.4535	13.3721	11.961	11.2814	11.0867	10.0041	10.1742	11.4453	16.4087	21.0129
6	6	0	0	2002-04-16	0.242667	32.6378	19.9135	15.6491	13.6393	12.5822	12.1121	10.731	10.721	11.6521	16.4505	21.0546
6	6	0	0	2002-04-17	0.242667	36.4216	23.3105	17.8865	15.2897	13.865	13.1242	11.4493	11.2615	11.868	16.5141	21.0933
6	6	0	0	2002-04-18	0.242667	38.9677	26.5729	20.0362	16.8776	15.1022	14.1019	12.1423	11.6797	12.0865	16.5858	21.1094
6	6	0	0	2002-04-19	0.242667	39.7551	29.6509	22.065	18.3749	16.2703	15.0262	12.7972	12.0554	12.3007	16.6601	21.1243
6	6	0	0	2002-04-20	0.242667	39.0476	32.5653	23.9848	19.7909	17.3783	15.9091	13.4168	12.4118	12.509	16.7224	21.0694
6	6	0	0	2002-04-21	0.242667	37.7725	35.2052	25.8665	21.18	18.466	16.7806	14.0256	12.7701	12.7215	16.789	21.0183
6	6	0	0	2002-04-22	0.242667	36.2955	36.3586	27.6388	22.4887	19.4909	17.6034	14.5965	13.1113	12.9256	16.8539	20.9556
6	6	0	0	2002-04-23	0.242667	34.7579	36.8628	29.3013	23.7166	20.4537	18.3781	15.1333	13.4341	13.121	16.921	20.8914
6	6	0	0	2002-04-24	0.242667	33.3077	36.5314	30.8699	24.8757	21.3615	19.1099	15.6383	13.7428	13.3106	16.9741	20.8441
6	6	0	0	2002-04-25	0.242667	31.9358	35.4917	32.3555	25.9726	22.2199	19.8046	16.1173	14.0383	13.495	17.03	20.8062
6	6	0	0	2002-04-26	0.242667	30.4646	34.1186	33.625	27.0161	23.0369	20.4657	16.5728	14.3226	13.6738	17.013	20.7784
6	6	0	0	2002-04-27	0.241467	29.0721	32.6838	33.9297	27.9972	23.8054	21.0877	17.0017	14.5914	13.7925	16.9794	20.7092
6	6	0	0	2002-04-28	0.241467	27.8241	31.291	33.8499	28.9319	24.5381	21.6821	17.4105	14.8514	13.9093	16.9105	20.6096
6	6	0	0	2002-04-29	0.241467	26.6425	29.9751	33.2351	29.813	25.2291	22.2416	17.7958	15.0979	14.023	16.8238	20.5031
6	6	0	0	2002-04-30	0.241467	25.5226	28.7292	32.1686	30.6473	25.8826	22.7703	18.114	15.3332	14.1352	16.6483	20.3826
6	6	0	0	2002-05-01	0.241467	24.3818	27.4232	30.873	31.3142	26.4894	23.261	18.3657	15.5545	14.2415	16.4732	20.2575
6	6	0	0	2002-05-02	0.241467	23.3845	26.2283	29.5841	31.2934	27.0746	23.7353	18.6108	15.771	14.3487	16.3156	20.1476
6	6	0	0	2002-05-03	0.241467	22.4278	25.1259	28.3366	30.9944	27.6311	24.1864	18.8468	15.9789	14.4348	16.1791	20.0446
6	6	0	0	2002-05-04	0.241467	21.5458	24.0942	27.1653	30.3128	28.1596	24.6152	19.0726	16.1772	14.5151	16.0587	19.9457
6	6	0	0	2002-05-05	0.241467	20.725	23.1238	26.0611	29.3078	28.6628	25.023	19.2931	16.3658	14.593	15.8763	19.8244
6	6	0	0	2002-05-06	0.241467	20.0594	22.2206	24.9686	28.1696	29.0632	25.4176	19.51	16.5493	14.6724	15.7169	19.6552
6	6	0	0	2002-05-07	0.241467	19.364	21.3742	23.9401	27.029	28.9075	25.7895	19.7157	16.7204	14.7499	15.5721	19.4864
6	6	0	0	2002-05-08	0.241467	18.6696	20.5487	22.9738	25.9198	28.5294	26.1375	19.91	16.8814	14.824	15.426	19.3137
6	6	0	0	2002-05-09	0.241467	18.0433	19.7946	22.0772	24.8848	27.8589	26.4736	20.099	17.036	14.8965	15.3146	19.1358
6	6	0	0	2002-05-10	0.241467	17.4598	19.0924	21.2358	23.9108	26.9382	26.7957	20.2817	17.1849	14.9564	15.2169	18.9762
6	6	0	0	2002-05-11	0.241467	16.8767	18.4681	20.4393	22.9456	25.911	27.0322	20.4569	17.3274	15.0138	15.1327	18.8053
6	6	0	0	2002-05-12	0.241467	16.3336	17.8488	19.694	22.0385	24.89	26.8119	20.6232	17.4627	15.0696	15.0596	18.6231
6	6	0	0	2002-05-13	0.175467	15.8541	17.2619	18.9838	21.1939	23.9067	26.4168	20.7827	17.5918	15.1249	14.9981	18.4458
6	6	0	0	2002-05-14	0.175467	15.365	16.7042	18.318	20.3991	22.9809	25.7766	20.9338	17.7143	15.1797	14.8996	18.273
6	6	0	0	2002-05-15	0.175467	14.8837	16.1718	17.6895	19.6478	22.1054	24.9291	21.0767	17.7958	15.2338	14.8162	18.1127
6	6	0	0	2002-05-16	0.175467	14.4231	15.6499	17.1197	18.9352	21.2411	23.9963	21.214	17.8422	15.2875	14.7382	17.9596
6	6	0	0	2002-05-17	0.175467	14.0034	15.1685	16.567	18.2714	20.4315	23.0755	21.3458	17.8878	15.3408	14.6699	17.8263
6	6	0	0	2002-05-18	0.175467	13.5915	14.7228	16.0384	17.6358	19.6734	22.1875	21.4704	17.9326	15.3237	14.6118	17.7061
6	6	0	0	2002-05-19	0.175467	13.2022	14.2836	15.5368	17.0391	18.9598	21.3511	21.5891	17.9766	15.2954	14.5633	17.5983
6	6	0	0	2002-05-20	0.175467	12.8388	13.8612	15.0608	16.4769	18.286	20.561	21.7023	18.023	15.2696	14.522	17.4901
6	6	0	0	2002-05-21	0.175467	12.4885	13.4558	14.5961	15.9619	17.6459	19.7824	21.8104	18.0695	15.2489	14.4867	17.3877
6	6	0	0	2002-05-22	0.1748	12.1521	13.0777	14.163	15.4633	17.0475	19.0516	21.914	18.1155	15.2328	14.4571	17.2934
6	6	0	0	2002-05-23	0.1748	11.8557	12.7236	13.7671	14.9927	16.4797	18.3705	22.0141	18.1623	15.2209	14.4333	17.2109
6	6	0	0	2002-05-24	0.1748	11.5691	12.3856	13.3787	14.5449	15.9451	17.728	22.1086	18.2069	15.2125	14.4149	17.1248
6	6	0	0	2002-05-25	0.1748	11.2928	12.0658	13.0051	14.1188	15.44	17.1205	22.1988	18.2505	15.207	14.4014	17.0481
6	6	0	0	2002-05-26	0.1748	11.0269	11.7577	12.6462	13.7038	14.9749	16.5427	22.2368	18.2922	15.204	14.3911	16.9189
6	6	0	0	2002-05-27	0.1748	10.7677	11.46	12.3077	13.3142	14.5242	16.0009	21.9772	18.3323	15.2026	14.3446	16.7836
6	6	0	0	2002-05-28	0.1748	12.9831	12.4194	12.8101	13.5711	14.5908	15.897	21.8813	18.5775	15.3413	14.4062	16.7078
6	6	0	0	2002-05-29	0.1748	15.1334	13.3512	13.3016	13.8174	14.6626	15.8098	21.6182	18.8137	15.4766	14.4697	16.6211
6	6	0	0	2002-05-30	0.1508	17.192	14.2424	13.7745	14.0518	14.7334	15.732	21.2109	19.0392	15.6075	14.5344	16.4651
6	6	0	0	2002-05-31	0.1508	19.1625	15.0947	14.226	14.2752	14.7955	15.6729	20.7396	19.2549	15.7353	14.5994	16.3131
6	6	0	0	2002-06-01	0.1508	20.9864	15.8771	14.6354	14.4774	14.8487	15.6012	20.2621	19.4562	15.8557	14.6618	16.1728
6	6	0	0	2002-06-02	0.1508	20.3722	16.6776	15.0703	14.7006	14.9313	15.5544	19.8151	19.6584	15.9787	14.7147	16.0542
6	6	0	0	2002-06-03	0.1508	19.8758	17.5046	15.5261	14.9451	15.0291	15.5315	19.4094	19.8613	16.1033	14.7692	16.101
6	6	0	0	2002-06-04	0.1508	19.4693	18.3307	15.9847	15.1982	15.1353	15.5227	19.0355	20.0608	16.2261	14.8254	15.9533
6	6	0	0	2002-06-05	0.1508	19.1052	19.1339	16.4316	15.4458	15.2412	15.5138	18.6654	20.2537	16.3455	14.8827	16.003
6	6	0	0	2002-06-06	0.1508	18.8398	19.9131	16.8647	15.6865	15.3499	15.5138	18.3226	20.4397	16.4596	14.9409	15.8872
6	6	0	0	2002-06-07	0.1508	18.5213	19.4467	17.2922	15.9331	15.4648	15.5297	18.011	20.6216	16.5721	15.0004	15.7734
6	6	0	0	2002-06-08	0.1508	18.1634	19.0196	17.7242	16.1854	15.5888	15.5515	17.7267	20.8005	16.6825	15.0603	15.6887
6	6	0	0	2002-06-09	0.1508	17.8045	18.6369	18.1553	16.4396	15.7195	15.5802	17.4654	20.9759	16.7913	15.1123	15.6163
6	6	0	0	2002-06-10	0.1508	17.4591	18.2822	18.5756	16.6885	15.8484	15.6109	17.2204	21.1095	16.8966	15.1631	15.5551
6	6	0	0	2002-06-11	0.1508	17.1467	17.9932	18.9909	16.9352	15.9785	15.6493	16.9976	21.0186	16.9996	15.2146	15.5042
6	6	0	0	2002-06-12	0.1504	16.8369	17.6791	18.5768	17.1784	16.1138	15.6934	16.7902	20.8431	17.1004	15.2671	15.4639
6	6	0	0	2002-06-13	0.115733	16.4952	17.3293	18.1781	17.417	16.2474	15.7399	16.5992	20.5462	17.1975	15.3197	15.3944
6	6	0	0	2002-06-14	0.115733	16.1252	16.9649	17.7997	17.6478	16.3768	15.7871	16.4213	20.1461	17.2676	15.3721	15.3371
6	6	0	0	2002-06-15	0.115733	15.7603	16.6097	17.4415	17.8718	16.5028	15.8338	16.2624	19.703	17.3141	15.424	15.2841
6	6	0	0	2002-06-16	0.115733	15.377	16.2618	17.1211	18.0875	16.6235	15.8782	16.1079	19.2649	17.3593	15.4752	15.2382
6	6	0	0	2002-06-17	0.115733	14.9796	15.9083	16.7793	17.6775	16.7386	15.9248	15.9627	18.8441	17.4047	15.474	15.2011
6	6	0	0	2002-06-18	0.113733	14.587	15.5411	16.4153	17.2804	16.851	15.9706	15.826	18.4488	17.4493	15.4642	15.1715
6	6	0	0	2002-06-19	0.105067	14.2215	15.1733	16.0504	16.9051	16.9625	16.0176	15.6986	18.0772	17.4959	15.4566	15.1478
6	6	0	0	2002-06-20	0.105067	13.8661	14.8132	15.6952	16.5477	17.0707	16.0634	15.5743	17.7108	17.5421	15.4525	15.1287
6	6	0	0	2002-06-21	0.105067	13.9123	14.6446	15.4786	16.3189	17.2524	16.1717	15.5021	17.3996	17.6089	15.4675	15.1268
6	6	0	0	2002-06-22	0.105067	13.9787	14.4792	15.265	16.0791	16.9377	16.2786	15.4414	17.1125	17.6757	15.4853	15.1291
6	6	0	0	2002-06-23	0.105067	14.0687	14.3278	15.0503	15.8286	16.638	16.3873	15.3844	16.8456	17.7417	15.5062	15.1361
6	6	0	0	2002-06-24	0.105067	14.1534	14.1874	14.8334	15.5761	16.3548	16.4943	15.3313	16.5954	17.8065	15.5289	15.1467
6	6	0	0	2002-06-25	0.105067	14.2381	14.0521	14.6215	15.3309	16.0858	16.5986	15.2811	16.3586	17.869	15.5527	15.1593
6	6	0	0	2002-06-26	0.100867	13.9759	13.9441	14.4217	15.1029	15.8503	16.7063	15.2401	16.1416	17.9317	15.5785	15.1436
6	6	0	0	2002-06-27	0.100867	13.7305	13.8546	14.2296	14.8814	15.6094	16.4032	15.2055	15.938	17.9941	15.6068	15.1323
6	6	0	0	2002-06-28	0.0996667	13.496	13.7823	14.0506	14.6617	15.3621	16.1143	15.1768	15.75	18.0553	15.636	15.1253
6	6	0	0	2002-06-29	0.100333	13.2763	13.7149	13.8837	14.4441	15.1162	15.8417	15.1526	15.5749	18.1147	15.666	15.1225
6	6	0	0	2002-06-30	0.0959333	13.0752	13.6566	13.7265	14.2349	14.8798	15.584	15.1313	15.4164	18.1726	15.6975	15.123
6	6	0	0	2002-07-01	0.0959333	12.9882	13.4821	13.6254	14.0633	14.68	15.3733	15.1273	15.2752	18.2366	15.7351	15.1308
6	6	0	0	2002-07-02	0.0959333	12.8862	13.3083	13.5318	13.8937	14.4824	15.1555	15.1271	15.1429	18.2988	15.7729	15.1296
6	6	0	0	2002-07-03	0.0959333	12.782	13.139	13.4489	13.7334	14.2858	14.9321	15.1301	15.0197	18.3596	15.8105	15.1285
6	6	0	0	2002-07-04	0.0959333	12.6797	12.978	13.3698	13.5827	14.0912	14.7101	15.135	14.9044	18.4186	15.8471	15.1291
6	6	0	0	2002-07-05	0.0959333	12.5958	12.8355	13.303	13.4438	13.9071	14.4991	15.1433	14.7944	18.4769	15.8839	15.1327
6	6	0	0	2002-07-06	0.0959333	12.3775	12.6829	13.1139	13.3135	13.7262	14.2962	15.1524	14.693	18.5332	15.9187	15.1387
6	6	0	0	2002-07-07	0.0806	12.1626	12.5244	12.9264	13.1895	13.5475	14.0957	15.1612	14.6007	18.5877	15.953	15.1462
6	6	0	0	2002-07-08	0.0806	11.9566	12.3693	12.7449	13.0758	13.3781	13.8976	15.1731	14.5125	18.6409	15.9863	15.1544
6	6	0	0	2002-07-09	0.0711333	11.7496	12.2147	12.5685	12.9648	13.2161	13.701	15.1857	14.4285	18.6923	16.0187	15.1568
6	6	0	0	2002-07-10	0.0711333	11.5143	12.055	12.3951	12.8558	13.0579	13.5083	15.1974	14.3476	18.7171	16.0495	15.1589
6	6	0	0	2002-07-11	0.0711333	11.2578	11.8176	12.2078	12.6498	12.9023	13.3148	15.2068	14.27	18.592	16.0784	15.1613
6	6	0	0	2002-07-12	0.0711333	11.0108	11.5867	12.0199	12.4475	12.7538	13.1247	14.9421	14.197	18.4117	16.1065	15.1653
6	6	0	0	2002-07-13	0.0703333	10.7678	11.3622	11.8355	12.2506	12.6142	12.943	14.6881	14.1294	18.1532	16.1339	15.1711
6	6	0	0	2002-07-14	0.0703333	10.5391	11.1444	11.6562	12.0612	12.4796	12.77	14.4465	14.0665	17.8287	16.1432	15.1784
6	6	0	0	2002-07-15	0.0703333	10.3409	10.9276	11.4837	11.8815	12.3529	12.6051	14.2173	14.0074	17.4784	16.1368	15.187
6	6	0	0	2002-07-16	0.0605333	10.1898	10.7238	11.275	11.7033	12.1578	12.4502	14.0072	13.9522	17.1347	16.1321	15.1969
6	6	0	0	2002-07-17	0.0605333	10.0418	10.5263	11.0718	11.5253	11.9664	12.3018	13.7943	13.9012	16.8047	16.129	15.1662
6	6	0	0	2002-07-18	0.0605333	10.035	10.4014	10.9198	11.3854	11.8075	12.1844	13.5946	13.8655	16.502	16.1331	15.1349
6	6	0	0	2002-07-19	0.0605333	10.4225	10.4808	10.9038	11.3477	11.7335	12.1368	13.4413	13.8651	16.2384	16.1561	15.1482
6	6	0	0	2002-07-20	0.0605333	10.9394	10.6401	10.9315	11.3476	11.6931	12.1173	13.3099	13.8783	15.9877	16.1859	15.1411
6	6	0	0	2002-07-21	0.0605333	11.5	10.8449	10.9825	11.3313	11.6627	12.0482	13.1917	13.8979	15.7571	16.2187	15.1393
6	6	0	0	2002-07-22	0.0605333	14.965	12.5034	12.0059	11.7184	12.2133	12.4662	13.3991	14.1604	15.7051	16.3733	15.2371
6	6	0	0	2002-07-23	0.0605333	18.2303	14.1327	13.011	12.0856	12.7543	12.8779	13.6021	14.4206	15.6644	16.5258	15.3362
6	6	0	0	2002-07-24	0.0605333	20.994	15.7083	13.9852	12.4315	13.277	13.2769	13.7957	14.6736	15.6306	16.6741	15.4341
6	6	0	0	2002-07-25	0.0605333	23.5055	17.2224	14.9286	12.7637	13.7792	13.6619	13.9817	14.9182	15.601	16.8172	15.5301
6	6	0	0	2002-07-26	0.0561333	25.8199	18.66	15.8365	13.0763	14.229	14.0222	14.1554	15.1522	15.5765	16.9543	15.6229
6	6	0	0	2002-07-27	0.0561333	25.1826	20.0738	16.7298	13.6845	14.6726	14.3748	14.3264	15.177	15.5583	17.0892	15.716
6	6	0	0	2002-07-28	0.0524	24.5391	21.3847	17.6015	14.2775	15.1058	14.7184	14.4958	15.2044	15.5475	17.2211	15.8082
6	6	0	0	2002-07-29	0.0524	23.8797	22.4369	18.4321	14.8433	15.517	15.0441	14.6573	15.2309	15.5393	17.347	15.8973
6	6	0	0	2002-07-30	0.0524	23.2738	23.3896	19.2396	15.3993	15.9148	15.3616	14.8166	15.2608	15.5395	17.4699	15.986
6	6	0	0	2002-07-31	0.0524	22.6422	24.2311	19.9874	15.9224	16.2819	15.6312	14.9626	15.2902	15.5352	17.5853	16.07
6	6	0	0	2002-08-01	0.0524	22.0376	23.6101	20.7284	16.4412	16.6476	15.9001	15.1107	15.3158	15.5367	17.6991	16.154
6	6	0	0	2002-08-02	0.0524	21.4817	23.0104	21.417	16.9559	17.0108	16.1684	15.2619	15.3382	15.544	17.8118	16.2377
6	6	0	0	2002-08-03	0.0496	21.0068	22.4433	21.9602	17.4602	17.3684	16.432	15.4112	15.359	15.5549	17.922	16.3197
6	6	0	0	2002-08-04	0.0342667	20.4596	21.8667	22.413	17.929	17.7038	16.6723	15.5492	15.3736	15.5617	18.0257	16.3972
6	6	0	0	2002-08-05	0.0342667	20.0341	21.3382	22.8321	18.3835	18.0372	16.9073	15.6428	15.3897	15.5725	18.1267	16.4721
6	6	0	0	2002-08-06	0.0342667	20.0475	21.0426	22.4226	18.9426	18.4549	17.2142	15.785	15.443	15.6132	18.2443	16.5609
6	6	0	0	2002-08-07	0.0342667	19.9901	20.7359	22.0036	19.4447	18.8552	17.5073	15.9199	15.4904	15.6521	18.3575	16.6462
6	6	0	0	2002-08-08	0.0342667	19.8704	20.4386	21.5856	19.8221	19.2347	17.7854	16.0464	15.5311	15.6888	18.4656	16.7277
6	6	0	0	2002-08-09	0.0342667	19.8112	20.1354	21.1815	20.1469	19.5979	18.0551	16.1684	15.5696	15.7248	18.5516	16.8063
6	6	0	0	2002-08-10	0.0342667	19.7098	19.872	20.7954	20.4359	19.9412	18.316	16.2799	15.6033	15.76	18.523	16.8816
6	6	0	0	2002-08-11	0.0342667	19.0933	19.5704	20.3928	19.9747	20.2652	18.5613	16.3808	15.631	15.7931	18.4491	16.9531
6	6	0	0	2002-08-12	0.0334667	18.5008	19.2455	19.9909	19.5124	20.5484	18.7962	16.4759	15.6576	15.8263	18.3139	17.022
6	6	0	0	2002-08-13	0.0334667	17.9096	18.89	19.5956	19.0511	20.7321	19.0138	16.5613	15.6799	15.857	18.125	16.8564
6	6	0	0	2002-08-14	0.0330667	17.3172	18.5642	19.196	18.5999	20.8735	19.2178	16.6397	15.6994	15.8855	17.9133	16.8921
6	6	0	0	2002-08-15	0.0330667	16.7389	18.2244	18.8276	18.1657	20.989	19.4075	16.6967	15.7168	15.912	17.7029	16.9262
6	6	0	0	2002-08-16	0.0330667	16.1965	17.6449	18.4458	17.7282	20.5115	19.5871	16.7487	15.7324	15.9379	17.5003	16.9596
6	6	0	0	2002-08-17	0.0330667	15.5868	17.0438	18.0259	17.2743	20.0197	19.7215	16.7876	15.7409	15.9588	17.3069	16.9898
6	6	0	0	2002-08-18	0.0330667	14.9661	16.4379	17.582	16.8226	19.5265	19.7711	16.8153	15.7419	15.9752	17.1216	17.0181
6	6	0	0	2002-08-19	0.0330667	14.3532	15.8352	17.1605	16.3697	19.043	19.7867	16.835	15.74	15.9891	16.9375	17.0451
6	6	0	0	2002-08-20	0.0330667	13.7911	15.265	16.7466	15.9529	18.5833	19.7894	16.8537	15.7067	16.0031	16.7652	17.0719
6	6	0	0	2002-08-21	0.0330667	13.2233	14.7099	16.171	15.5246	18.1197	19.2968	16.8665	15.6695	16.0139	16.603	17.0971
6	6	0	0	2002-08-22	0.0330667	12.7299	14.1583	15.6058	15.0863	17.6579	18.8047	16.8735	15.6293	16.0233	16.4495	17.1206
6	6	0	0	2002-08-23	0.0330667	12.3039	13.635	15.0599	14.6469	17.2114	18.3228	16.8769	15.5878	16.0313	16.3036	17.1428
6	6	0	0	2002-08-24	0.0330667	11.9018	13.1274	14.524	14.2303	16.7686	17.8527	16.8781	15.5453	16.0377	16.164	17.1634
6	6	0	0	2002-08-25	0.0330667	11.4875	12.6393	14.0058	13.8163	16.3523	17.4007	16.8793	15.4994	16.0431	16.0325	17.1826
6	6	0	0	2002-08-26	0.0330667	11.1086	12.166	13.5095	13.2899	15.9338	16.9512	16.8774	15.451	15.9097	15.9065	17.2007
6	6	0	0	2002-08-27	0.0330667	10.7561	11.743	13.0243	12.7778	15.5127	16.5076	16.8722	15.401	15.7801	15.7875	17.2174
6	6	0	0	2002-08-28	0.0330667	10.4092	11.3566	12.5597	12.2816	15.0918	16.0777	16.8625	15.3489	15.6545	15.6739	17.2322
6	6	0	0	2002-08-29	0.0330667	10.0847	10.9933	12.1132	11.7986	14.6936	15.6546	16.8496	15.2961	15.5334	15.5683	17.2458
6	6	0	0	2002-08-30	0.0330667	9.77523	10.6313	11.6846	11.3326	14.3005	15.2561	16.8332	15.2316	15.4202	15.4654	17.2585
6	6	0	0	2002-08-31	0.0330667	9.49446	10.3015	11.2755	10.8902	13.8232	14.8606	16.8166	15.1683	15.3054	15.3676	17.2704
6	6	0	0	2002-09-01	0.0330667	9.23542	9.99578	10.9071	10.4615	13.3618	14.4665	16.7834	15.1054	15.189	15.2746	17.2818
6	6	0	0	2002-09-02	0.0330667	9.02354	9.71637	10.5789	10.0601	12.9225	14.0805	16.707	15.0442	15.0742	15.1863	17.2927
6	6	0	0	2002-09-03	0.0330667	8.8434	9.46403	10.2766	9.68017	12.5	13.7186	16.6167	14.9834	14.9633	15.1009	17.3033
6	6	0	0	2002-09-04	0.0330667	8.67982	9.22753	9.98084	9.31783	12.0945	13.3637	16.5198	14.9235	14.8558	15.0202	17.3132
6	6	0	0	2002-09-05	0.0330667	8.51757	9.00603	9.70689	8.97042	11.7081	12.939	16.1002	14.8646	14.7497	14.9446	17.3223
[truncated: 21,662 more rows]
